# Supplementary material for: Iodine-Catalyzed Prins Cyclization of Homoallylic Alcohols and Aldehydes
Source: MDPI journal article supplement (doi:10.3390/molecules180911100), 2013-09-10

# Supplementary Materials

## Contents

|                                                                                      |     |
|--------------------------------------------------------------------------------------|-----|
| Part 1: X-ray Crystallographic Data Collection .....                                 | S2  |
| Part 2: Cartesian Coordinates for Optimized Geometries and Thermochemical data ..... | S3  |
| 1. Thermochemical Data .....                                                         | S3  |
| 2. Energy Surface Scan.....                                                          | S4  |
| 3. Cartesian Coordinates for Optimized geometries.....                               | S4  |
| Part 3: Selected-NMR Spectra .....                                                   | S24 |

## Part 1: X-ray Crystallographic Data Collection

Table S1. Crystallographic data for **7k** and **15e**.

| Compound                                       | 7k                                            | 15e                                         |
|------------------------------------------------|-----------------------------------------------|---------------------------------------------|
| Empirical formula                              | C <sub>20</sub> H <sub>19</sub> BrO           | C <sub>21</sub> H <sub>21</sub> BrO         |
| Formula weight                                 | 355.26                                        | 369.29                                      |
| Crystal system                                 | Orthorhombic                                  | Monoclinic                                  |
| Space group                                    | P2 <sub>1</sub> 2 <sub>1</sub> 2 <sub>1</sub> | P2 <sub>1</sub> /c                          |
| Unit Cell Dimensions, (Å, °)                   | <i>a</i> = 7.2662(1)                          | <i>a</i> = 14.0033(3)                       |
|                                                | <i>b</i> = 12.8517(2)                         | <i>b</i> = 7.7072(2)                        |
|                                                | <i>c</i> = 16.8476(3)                         | <i>c</i> = 15.9479(3)                       |
|                                                |                                               | β = 105.606(2)                              |
| V, Å <sup>3</sup>                              | 1573.28(4)                                    | 1657.74(6)                                  |
| Z                                              | 4                                             | 4                                           |
| ρ calc., Mg m <sup>−3</sup>                    | 1.500                                         | 1.480                                       |
| μ, mm <sup>−1</sup>                            | 3.538                                         | 3.379                                       |
| F(000)                                         | 728                                           | 760                                         |
| θ-max, °                                       | 65.79                                         | 66.481                                      |
| Index ranges                                   | −8 ≤ <i>h</i> ≤ 8,                            | −16 ≤ <i>h</i> ≤ 16,                        |
|                                                | −14 ≤ <i>k</i> ≤ 15,                          | −8 ≤ <i>k</i> ≤ 8,                          |
|                                                | −19 ≤ <i>l</i> ≤ 19                           | −18 ≤ <i>l</i> ≤ 18                         |
| Reflections collected                          | 25884                                         | 61561                                       |
| Independent reflections                        | 2620 [R(int) = 0.0429]                        | 2893 [R(int) = 0.0670]                      |
| Completeness to θ-max, %                       | 97.1                                          | 96.5                                        |
| Refinement method                              | Full-matrix least-squares on F <sup>2</sup>   | Full-matrix least-squares on F <sup>2</sup> |
| Data/restraints/ parameters                    | 2620 / 0 / 200                                | 2893 / 0 / 209                              |
| Goodness-of-fit on F <sup>2</sup>              | 1.114                                         | 1.080                                       |
| Final R indices [I > 2σ(I)]                    | R1 = 0.0216, wR2 = 0.0510                     | R1 = 0.0297, wR2 = 0.0635                   |
| R indices (all data)                           | R1 = 0.0240, wR2 = 0.0525                     | R1 = 0.0406, wR2 = 0.0689                   |
| Absolute structure parameter                   | −0.041(8)                                     |                                             |
| Largest diff. peak and hole, e.Å <sup>−3</sup> | 0.224 and −0.355                              | 0.436 and −0.283                            |

## Part 2: Cartesian Coordinates for Optimized Geometries and Thermochemical data

## 1. Thermochemical Data

**Table S2.** Free energy ( $G$  + ZPE + thermal corrections at 298.15 K) in Hartrees for all compounds studied determined at the DFT B3LYP/6-31+G(d,p) level, changes in free energy ( $\Delta G^0$ ) for different processes, activation energy ( $\Delta G^\ddagger$ ) and relative energies ( $\Delta G^{0,\text{rel}}$ ).<sup>a</sup>

| REAGENTS                                    | $G^0$ (Hartrees) | $G^0$ (Hartrees) | $\Delta G^{0,E/Z}$ (kJ mol <sup>-1</sup> )    | $\Delta G^{0,\text{rel}}$ (kJ mol <sup>-1</sup> ) |
|---------------------------------------------|------------------|------------------|-----------------------------------------------|---------------------------------------------------|
| (E)-3h, A                                   | -849.49142       |                  |                                               | 0                                                 |
| (Z)-3h, A                                   | -849.47487       |                  | 43                                            | 43                                                |
| (E)-3h, B_2                                 | -849.49210       |                  |                                               |                                                   |
| (Z)-3h, B_2                                 | -849.47645       |                  | 41                                            |                                                   |
| (E)-3h, B                                   | -849.48584       |                  |                                               | 15                                                |
| (Z)-3h, B                                   | -849.47245       |                  |                                               | 50                                                |
| TS                                          |                  |                  | $\Delta G^\ddagger$ (kJ mol <sup>-1</sup> )   |                                                   |
| (E)-3h, A $\rightarrow$ <i>cis</i> -4h, A   | -849.48408       |                  | 19                                            |                                                   |
| (Z)-3h, A $\rightarrow$ <i>trans</i> -4h, A | -849.46937       |                  | 14                                            |                                                   |
| INTERMEDIATES                               |                  |                  | $\Delta G^{0,R-I}$ (kJ mol <sup>-1</sup> )    | $\Delta G^{0,\text{rel}}$ (kJ mol <sup>-1</sup> ) |
| <i>cis</i> -4h, A                           | -849.49182       |                  | -1                                            | 0                                                 |
| <i>trans</i> -4h, A                         | -849.48516       |                  | -27                                           | 17                                                |
| <i>cis</i> -4h, B                           | -849.47772       |                  | 21                                            | 37                                                |
| <i>trans</i> -4h, B                         | -849.47804       |                  | -15                                           | 36                                                |
| PRODUCTS                                    |                  |                  | $\Delta G^{0,7h-12h}$ (kJ mol <sup>-1</sup> ) |                                                   |
| <i>cis</i> , A                              | -849.14799       | -849.138025      | -26                                           |                                                   |
| <i>trans</i> , A                            | -849.14685       | -849.132352      | -38                                           |                                                   |
| <i>cis</i> , B                              | -849.14691       | -849.140602      | -17                                           |                                                   |
| <i>trans</i> , B                            | -849.14513       | -849.137892      | -19                                           |                                                   |
|                                             | 7s               | 12s              | $\Delta G^{0,7s-12s}$ (kJ mol <sup>-1</sup> ) | $K$ , Boltzmann                                   |
|                                             | -775.311037      | -775.310585      | -1.2                                          | 1.6                                               |

<sup>a</sup> All compounds have no imaginary frequencies, except those corresponding to transition states (TS), which have one negative (imaginary) frequency corresponding to the reaction coordinate.

## 2. Energy Surface Scan

**Figure S1.** Change in energy resulting from the rotation around the dihedral angle formed between the 1,2-dihydronaphthalene ring and the benzylidene(propyl)oxonium moiety ( $\text{Me}-\text{CH}-(\text{C}=\text{C})$ ,  $\phi_1$ ) of compound (*E*)-3h, A, determined by a relaxed potential energy surface scan at the B3LYP/6-31G(d) level.

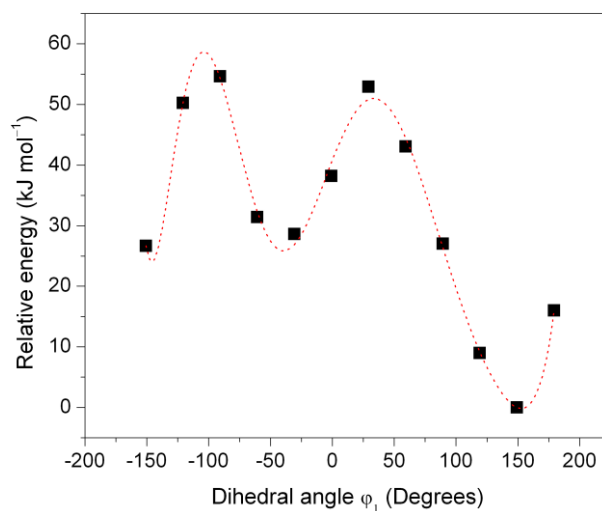

## 3. Cartesian Coordinates for Optimized geometries

### Reagents

(*E*)-3h, A

symmetry c1

|   |              |              |              |
|---|--------------|--------------|--------------|
| C | -4.283592000 | -1.508947000 | -1.143037000 |
| C | -3.568098000 | -2.001736000 | -0.048264000 |
| C | -2.556013000 | -1.250802000 | 0.552221000  |
| C | -2.242845000 | 0.036178000  | 0.040823000  |
| C | -2.987242000 | 0.524962000  | -1.051061000 |
| C | -3.994433000 | -0.238057000 | -1.641832000 |
| H | -5.067248000 | -2.109336000 | -1.594399000 |
| H | -3.807682000 | -2.982805000 | 0.353133000  |
| H | -2.798696000 | 1.515540000  | -1.451139000 |
| H | -4.552556000 | 0.162267000  | -2.482171000 |
| C | 1.289091000  | 0.562286000  | -0.887981000 |
| C | -0.960575000 | 2.283842000  | 0.338441000  |
| H | -1.940813000 | 2.703454000  | 0.083442000  |
| C | -0.132985000 | 2.446623000  | -0.959966000 |
| H | 0.071639000  | 3.494712000  | -1.178166000 |
| H | -0.606374000 | 1.970045000  | -1.821832000 |
| O | 1.191226000  | 1.848323000  | -0.793883000 |
| C | 2.512108000  | -0.108818000 | -0.609865000 |
| C | 2.579464000  | -1.498251000 | -0.880967000 |
| C | 3.646619000  | 0.571119000  | -0.098551000 |
| C | 3.758913000  | -2.192922000 | -0.643569000 |
| H | 1.711839000  | -2.013376000 | -1.283657000 |
| C | 4.817030000  | -0.133900000 | 0.132205000  |

|   |              |              |              |
|---|--------------|--------------|--------------|
| H | 3.591088000  | 1.635431000  | 0.102892000  |
| C | 4.873350000  | -1.512106000 | -0.137836000 |
| H | 3.817589000  | -3.255525000 | -0.853377000 |
| H | 5.691757000  | 0.377384000  | 0.519989000  |
| H | 5.795352000  | -2.055417000 | 0.045629000  |
| C | -0.388980000 | -1.285918000 | 1.845627000  |
| C | -1.849296000 | -1.747506000 | 1.794096000  |
| C | -1.147206000 | 0.809369000  | 0.674158000  |
| H | -1.911476000 | -2.837691000 | 1.859918000  |
| H | 0.222022000  | -1.880272000 | 1.144999000  |
| H | 0.036241000  | -1.469634000 | 2.837383000  |
| H | -2.376103000 | -1.351560000 | 2.674773000  |
| C | -0.269032000 | 0.172569000  | 1.497360000  |
| H | 0.534997000  | 0.733602000  | 1.964007000  |
| C | -0.376927000 | 3.145681000  | 1.472065000  |
| H | -0.400747000 | 4.202389000  | 1.188239000  |
| H | -0.966654000 | 3.028647000  | 2.384437000  |
| H | 0.660760000  | 2.891276000  | 1.704540000  |
| H | 0.449160000  | 0.012281000  | -1.311983000 |

(Z)-3h, A

symmetry c1

|   |              |              |              |
|---|--------------|--------------|--------------|
| C | 0.934339000  | 3.572147000  | -0.947600000 |
| C | 0.918136000  | 3.220170000  | 0.404813000  |
| C | 1.110214000  | 1.898501000  | 0.811015000  |
| C | 1.320754000  | 0.889078000  | -0.165542000 |
| C | 1.350964000  | 1.265837000  | -1.523797000 |
| C | 1.157008000  | 2.590016000  | -1.914535000 |
| H | 0.788305000  | 4.606956000  | -1.241481000 |
| H | 0.766758000  | 3.988302000  | 1.158489000  |
| H | 1.541586000  | 0.529828000  | -2.297818000 |
| H | 1.190596000  | 2.853628000  | -2.967012000 |
| C | -0.944806000 | -2.257988000 | 0.174932000  |
| C | 2.023247000  | -1.556282000 | -0.698240000 |
| H | 2.627631000  | -1.051815000 | -1.461283000 |
| C | 0.841210000  | -2.159736000 | -1.503709000 |
| H | 1.179746000  | -2.958436000 | -2.164105000 |
| H | 0.305132000  | -1.406839000 | -2.074201000 |
| O | -0.051934000 | -2.831286000 | -0.568644000 |
| C | -1.840113000 | -1.167161000 | -0.052558000 |
| C | -2.691919000 | -0.869940000 | 1.047853000  |
| C | -2.006766000 | -0.437773000 | -1.259862000 |
| C | -3.649604000 | 0.130460000  | 0.955770000  |
| H | -2.597552000 | -1.442965000 | 1.965828000  |
| C | -2.981160000 | 0.545147000  | -1.346176000 |
| H | -1.416272000 | -0.661110000 | -2.137226000 |
| C | -3.794523000 | 0.839765000  | -0.241770000 |
| H | -4.291799000 | 0.347823000  | 1.802551000  |
| H | -3.116028000 | 1.085660000  | -2.276974000 |
| H | -4.551094000 | 1.614112000  | -0.322806000 |
| C | 0.640435000  | 0.135194000  | 2.547892000  |
| C | 1.189582000  | 1.539554000  | 2.277716000  |

|   |              |              |              |
|---|--------------|--------------|--------------|
| C | 1.517760000  | -0.508699000 | 0.281268000  |
| H | 0.661520000  | 2.282158000  | 2.883047000  |
| H | -0.460907000 | 0.152637000  | 2.478369000  |
| H | 0.876523000  | -0.181967000 | 3.568385000  |
| H | 2.244092000  | 1.576100000  | 2.588509000  |
| C | 1.182833000  | -0.856612000 | 1.556112000  |
| H | 1.358441000  | -1.871133000 | 1.901939000  |
| C | 2.897701000  | -2.665055000 | -0.087269000 |
| H | 3.308851000  | -3.296482000 | -0.880896000 |
| H | 3.735390000  | -2.229553000 | 0.462851000  |
| H | 2.343836000  | -3.315256000 | 0.594643000  |
| H | -1.131027000 | -2.851099000 | 1.070461000  |

(E)-3h, B\_2

symmetry c1

|   |              |              |              |
|---|--------------|--------------|--------------|
| C | -4.237654000 | -1.607939000 | -1.140190000 |
| C | -3.292698000 | -2.156218000 | -0.269218000 |
| C | -2.322576000 | -1.358622000 | 0.341547000  |
| C | -2.290940000 | 0.035484000  | 0.076468000  |
| C | -3.254873000 | 0.571679000  | -0.799681000 |
| C | -4.218036000 | -0.237762000 | -1.402748000 |
| H | -4.987926000 | -2.243981000 | -1.599306000 |
| H | -3.313894000 | -3.221430000 | -0.054066000 |
| H | -3.287009000 | 1.637150000  | -1.001632000 |
| H | -4.955440000 | 0.204696000  | -2.065027000 |
| C | 1.269729000  | 0.417519000  | -0.857044000 |
| C | -0.994802000 | 2.283527000  | 0.241727000  |
| H | -1.955909000 | 2.746545000  | -0.014449000 |
| C | -0.253013000 | 2.229780000  | -1.108752000 |
| H | -0.080267000 | 3.224298000  | -1.519654000 |
| H | -0.765274000 | 1.600087000  | -1.840576000 |
| O | 1.102132000  | 1.692060000  | -0.921695000 |
| C | 2.546165000  | -0.143428000 | -0.580574000 |
| C | 2.679415000  | -1.553158000 | -0.644786000 |
| C | 3.672196000  | 0.664344000  | -0.277375000 |
| C | 3.914346000  | -2.142089000 | -0.410617000 |
| H | 1.814922000  | -2.167291000 | -0.880776000 |
| C | 4.898767000  | 0.063450000  | -0.044435000 |
| H | 3.565187000  | 1.742750000  | -0.234363000 |
| C | 5.019862000  | -1.335049000 | -0.110089000 |
| H | 4.023764000  | -3.219994000 | -0.461549000 |
| H | 5.766933000  | 0.671446000  | 0.186715000  |
| H | 5.985376000  | -1.796721000 | 0.073387000  |
| C | -1.284197000 | -1.966312000 | 1.260510000  |
| C | -0.873513000 | -0.998547000 | 2.374488000  |
| C | -0.597696000 | 0.372881000  | 1.823228000  |
| C | -1.266498000 | 0.874735000  | 0.755114000  |
| H | -1.679055000 | -0.919224000 | 3.121791000  |
| H | 0.000619000  | -1.378423000 | 2.913224000  |
| H | -0.389822000 | -2.228330000 | 0.672092000  |
| H | -1.654508000 | -2.905927000 | 1.680957000  |
| H | 0.106528000  | 0.997832000  | 2.363671000  |

|   |              |              |              |
|---|--------------|--------------|--------------|
| C | -0.292889000 | 3.233719000  | 1.225020000  |
| H | -0.226771000 | 4.237211000  | 0.793571000  |
| H | -0.858697000 | 3.307198000  | 2.156984000  |
| H | 0.723573000  | 2.912918000  | 1.470129000  |
| H | 0.424052000  | -0.225258000 | -1.103132000 |

## (Z)-3h, B\_2

symmetry c1

|   |              |              |              |
|---|--------------|--------------|--------------|
| C | 1.385325000  | 3.382441000  | -0.922980000 |
| C | 1.170288000  | 2.985104000  | 0.399962000  |
| C | 1.280230000  | 1.645890000  | 0.782284000  |
| C | 1.619485000  | 0.664644000  | -0.185032000 |
| C | 1.842141000  | 1.083130000  | -1.511221000 |
| C | 1.725138000  | 2.425554000  | -1.880222000 |
| H | 1.306290000  | 4.429907000  | -1.197394000 |
| H | 0.921962000  | 3.729992000  | 1.151788000  |
| H | 2.143591000  | 0.371035000  | -2.272932000 |
| H | 1.917852000  | 2.720553000  | -2.907165000 |
| C | -1.588236000 | -2.123833000 | 0.024117000  |
| C | 1.768410000  | -1.853497000 | -0.811756000 |
| H | 2.412336000  | -1.519899000 | -1.636743000 |
| C | 0.399193000  | -2.018097000 | -1.496642000 |
| H | 0.448916000  | -2.770768000 | -2.285630000 |
| H | -0.005981000 | -1.091553000 | -1.891701000 |
| O | -0.557079000 | -2.620536000 | -0.546375000 |
| C | -2.271291000 | -0.873095000 | -0.049684000 |
| C | -3.526167000 | -0.883047000 | 0.627705000  |
| C | -1.859331000 | 0.316486000  | -0.712955000 |
| C | -4.350463000 | 0.231473000  | 0.612326000  |
| H | -3.845591000 | -1.779994000 | 1.150348000  |
| C | -2.690306000 | 1.425783000  | -0.711961000 |
| H | -0.890218000 | 0.400011000  | -1.183331000 |
| C | -3.933661000 | 1.385626000  | -0.061638000 |
| H | -5.307688000 | 0.208432000  | 1.121736000  |
| H | -2.367251000 | 2.333510000  | -1.209837000 |
| H | -4.573482000 | 2.262902000  | -0.073332000 |
| C | 1.016692000  | 1.214350000  | 2.208438000  |
| C | 1.915917000  | 0.042655000  | 2.613758000  |
| C | 1.894829000  | -1.033167000 | 1.560825000  |
| C | 1.750709000  | -0.754983000 | 0.246686000  |
| H | 2.952697000  | 0.388527000  | 2.749583000  |
| H | 1.602703000  | -0.363684000 | 3.580762000  |
| H | -0.035112000 | 0.898724000  | 2.298143000  |
| H | 1.146412000  | 2.059427000  | 2.891183000  |
| H | 2.058489000  | -2.055492000 | 1.887286000  |
| C | 2.319923000  | -3.213526000 | -0.354117000 |
| H | 2.370029000  | -3.904582000 | -1.201412000 |
| H | 3.331063000  | -3.098251000 | 0.042910000  |
| H | 1.701704000  | -3.679917000 | 0.417518000  |
| H | -2.045047000 | -2.873932000 | 0.671856000  |

## (E)-3h, B

## symmetry c1

|   |              |              |              |
|---|--------------|--------------|--------------|
| C | 2.741286000  | -2.588619000 | -1.363417000 |
| C | 2.404522000  | -2.666718000 | -0.009231000 |
| C | 1.928764000  | -1.552880000 | 0.684210000  |
| C | 1.781931000  | -0.312716000 | 0.005846000  |
| C | 2.132119000  | -0.253172000 | -1.357353000 |
| C | 2.604401000  | -1.375168000 | -2.038170000 |
| H | 3.112768000  | -3.466476000 | -1.882875000 |
| H | 2.519246000  | -3.608937000 | 0.519967000  |
| H | 2.046075000  | 0.674241000  | -1.909009000 |
| H | 2.869189000  | -1.297411000 | -3.087984000 |
| C | -1.453158000 | 1.526500000  | -0.191104000 |
| C | 1.375412000  | 2.287358000  | 0.269538000  |
| H | 0.968940000  | 2.903742000  | 1.079502000  |
| C | 0.518550000  | 2.602883000  | -0.990425000 |
| H | 1.064794000  | 2.488021000  | -1.924289000 |
| H | 0.108844000  | 3.615963000  | -0.944964000 |
| O | -0.609922000 | 1.677098000  | -1.154233000 |
| C | -2.463798000 | 0.531760000  | -0.250102000 |
| C | -3.439678000 | 0.509141000  | 0.778731000  |
| C | -2.521272000 | -0.412722000 | -1.307565000 |
| C | -4.457641000 | -0.433360000 | 0.743959000  |
| H | -3.390396000 | 1.233262000  | 1.587300000  |
| C | -3.542185000 | -1.349676000 | -1.327804000 |
| H | -1.767829000 | -0.392383000 | -2.087183000 |
| C | -4.507888000 | -1.359242000 | -0.307470000 |
| H | -5.210783000 | -0.452846000 | 1.524259000  |
| H | -3.597094000 | -2.075984000 | -2.131695000 |
| H | -5.305378000 | -2.095702000 | -0.333693000 |
| C | 1.628464000  | -1.631565000 | 2.164490000  |
| C | 0.452462000  | -0.727349000 | 2.548370000  |
| C | 0.622149000  | 0.638462000  | 1.943976000  |
| C | 1.259149000  | 0.848828000  | 0.761737000  |
| H | -0.493902000 | -1.167629000 | 2.192326000  |
| H | 0.363520000  | -0.651901000 | 3.636636000  |
| H | 2.519747000  | -1.309640000 | 2.723255000  |
| H | 1.432534000  | -2.666693000 | 2.458967000  |
| H | 0.241229000  | 1.491993000  | 2.502923000  |
| C | 2.817346000  | 2.782215000  | 0.030449000  |
| H | 2.818464000  | 3.835180000  | -0.271533000 |
| H | 3.393472000  | 2.701416000  | 0.955482000  |
| H | 3.331780000  | 2.203784000  | -0.739855000 |
| H | -1.431470000 | 2.237464000  | 0.634323000  |

## (Z)-3h, B

## symmetry c1

|   |              |              |              |
|---|--------------|--------------|--------------|
| C | -4.952870000 | -0.164819000 | -0.957945000 |
| C | -4.474611000 | 1.000269000  | -0.353209000 |
| C | -3.182073000 | 1.067765000  | 0.170023000  |
| C | -2.329845000 | -0.065672000 | 0.090665000  |
| C | -2.832163000 | -1.230605000 | -0.518547000 |
| C | -4.125286000 | -1.284445000 | -1.039406000 |

|   |              |              |              |
|---|--------------|--------------|--------------|
| H | -5.960991000 | -0.196139000 | -1.359274000 |
| H | -5.118088000 | 1.873253000  | -0.283182000 |
| H | -2.220770000 | -2.120385000 | -0.600227000 |
| H | -4.481141000 | -2.198130000 | -1.505152000 |
| C | 1.730217000  | -0.286787000 | -1.481544000 |
| C | -0.090351000 | -1.159186000 | 1.000502000  |
| H | 0.788256000  | -0.741310000 | 1.503456000  |
| C | 0.435072000  | -1.978600000 | -0.202137000 |
| H | -0.317709000 | -2.636581000 | -0.628776000 |
| H | 1.310894000  | -2.576749000 | 0.056710000  |
| O | 0.769050000  | -1.121145000 | -1.350194000 |
| C | 2.932157000  | -0.051465000 | -0.749036000 |
| C | 3.746118000  | 0.981752000  | -1.293584000 |
| C | 3.392808000  | -0.754930000 | 0.397959000  |
| C | 4.964949000  | 1.304397000  | -0.714290000 |
| H | 3.407999000  | 1.520301000  | -2.174069000 |
| C | 4.616330000  | -0.430734000 | 0.960700000  |
| H | 2.808329000  | -1.546873000 | 0.843614000  |
| C | 5.400744000  | 0.597486000  | 0.411911000  |
| H | 5.576219000  | 2.094880000  | -1.135960000 |
| H | 4.968633000  | -0.973081000 | 1.831632000  |
| H | 6.355502000  | 0.843559000  | 0.866645000  |
| C | -2.693616000 | 2.315788000  | 0.871445000  |
| C | -1.200376000 | 2.546635000  | 0.620763000  |
| C | -0.432801000 | 1.276255000  | 0.872815000  |
| C | -0.954936000 | 0.047787000  | 0.644221000  |
| H | -1.040538000 | 2.876350000  | -0.418499000 |
| H | -0.823226000 | 3.351211000  | 1.260014000  |
| H | -2.857346000 | 2.201441000  | 1.953664000  |
| H | -3.279213000 | 3.184188000  | 0.555592000  |
| H | 0.574481000  | 1.362956000  | 1.277223000  |
| C | -0.738739000 | -2.146990000 | 1.996087000  |
| H | -0.042175000 | -2.948767000 | 2.265895000  |
| H | -1.005586000 | -1.614703000 | 2.912374000  |
| H | -1.647491000 | -2.602150000 | 1.597155000  |
| H | 1.587192000  | 0.312489000  | -2.381645000 |

**TS**

(*E*)-3h, A → *cis*-4h, A  
symmetry c1

|   |              |              |              |
|---|--------------|--------------|--------------|
| C | -2.033770000 | -3.266068000 | -0.666258000 |
| C | -1.748057000 | -2.860648000 | 0.639761000  |
| C | -1.486235000 | -1.522708000 | 0.936128000  |
| C | -1.519054000 | -0.558978000 | -0.112617000 |
| C | -1.828648000 | -0.987324000 | -1.425533000 |
| C | -2.073429000 | -2.326008000 | -1.703013000 |
| H | -2.233838000 | -4.312643000 | -0.874631000 |
| H | -1.735130000 | -3.594786000 | 1.440181000  |
| H | -1.870709000 | -0.273887000 | -2.241600000 |
| H | -2.302369000 | -2.638159000 | -2.716645000 |
| C | 1.194630000  | 1.782956000  | 0.316088000  |
| C | -1.619120000 | 1.955513000  | -0.734366000 |

|   |              |              |              |
|---|--------------|--------------|--------------|
| H | -2.284303000 | 1.574260000  | -1.512881000 |
| C | -0.313187000 | 2.398684000  | -1.472243000 |
| H | -0.484099000 | 3.329468000  | -2.014712000 |
| H | 0.036306000  | 1.637985000  | -2.171192000 |
| O | 0.682554000  | 2.712960000  | -0.497591000 |
| C | 1.963249000  | 0.593207000  | -0.054004000 |
| C | 2.972417000  | 0.227834000  | 0.867997000  |
| C | 1.819211000  | -0.175963000 | -1.230054000 |
| C | 3.818124000  | -0.849540000 | 0.618269000  |
| H | 3.111377000  | 0.815412000  | 1.771315000  |
| C | 2.673595000  | -1.245640000 | -1.478663000 |
| H | 1.052143000  | 0.047352000  | -1.957520000 |
| C | 3.671705000  | -1.587775000 | -0.558659000 |
| H | 4.594481000  | -1.103547000 | 1.332489000  |
| H | 2.559591000  | -1.818759000 | -2.393058000 |
| H | 4.332349000  | -2.424706000 | -0.761922000 |
| C | -0.249327000 | 0.090757000  | 2.415309000  |
| C | -1.254195000 | -1.066215000 | 2.357289000  |
| C | -1.268532000 | 0.838941000  | 0.217967000  |
| H | -0.905563000 | -1.901174000 | 2.971675000  |
| H | 0.757641000  | -0.304562000 | 2.226411000  |
| H | -0.230584000 | 0.531226000  | 3.416203000  |
| H | -2.215522000 | -0.746553000 | 2.784616000  |
| C | -0.588429000 | 1.156725000  | 1.394372000  |
| H | -0.660546000 | 2.177970000  | 1.754373000  |
| C | -2.311441000 | 3.167774000  | -0.078290000 |
| H | -2.652039000 | 3.857597000  | -0.855915000 |
| H | -3.186386000 | 2.852734000  | 0.496277000  |
| H | -1.642606000 | 3.721943000  | 0.584586000  |
| H | 1.582331000  | 2.275995000  | 1.205796000  |

(Z)-3h, A → *trans*-4h, A  
symmetry c1

|   |              |              |              |
|---|--------------|--------------|--------------|
| C | -4.467599000 | -1.562995000 | -0.716525000 |
| C | -3.535860000 | -2.065653000 | 0.195960000  |
| C | -2.428155000 | -1.310088000 | 0.579122000  |
| C | -2.259331000 | -0.001193000 | 0.039497000  |
| C | -3.222026000 | 0.495367000  | -0.872156000 |
| C | -4.307580000 | -0.281077000 | -1.256251000 |
| H | -5.320674000 | -2.169658000 | -1.004582000 |
| H | -3.674912000 | -3.057841000 | 0.615485000  |
| H | -3.116909000 | 1.487085000  | -1.298197000 |
| H | -5.030155000 | 0.108005000  | -1.965858000 |
| C | 1.144294000  | 0.537699000  | -0.749143000 |
| C | 2.671692000  | -1.381132000 | -1.035874000 |
| H | -2.027393000 | 2.649920000  | -0.027911000 |
| C | -0.129280000 | 2.493269000  | -0.999759000 |
| H | 0.075626000  | 3.554646000  | -1.144792000 |
| H | -0.590253000 | 2.079320000  | -1.903907000 |
| O | 1.141100000  | 1.875234000  | -0.785145000 |
| C | 2.434568000  | -0.099546000 | -0.502069000 |
| C | 0.020721000  | 0.131152000  | 0.975005000  |

|   |              |              |              |
|---|--------------|--------------|--------------|
| C | 3.448190000  | 0.550904000  | 0.230531000  |
| C | 3.904484000  | -2.002028000 | -0.842346000 |
| H | 1.903099000  | -1.876766000 | -1.622528000 |
| C | 4.675746000  | -0.074330000 | 0.418221000  |
| H | 3.272382000  | 1.543542000  | 0.632054000  |
| C | 4.904435000  | -1.351277000 | -0.113949000 |
| H | 4.088205000  | -2.984462000 | -1.264792000 |
| H | 5.459073000  | 0.429434000  | 0.975243000  |
| H | 5.865015000  | -1.834196000 | 0.036126000  |
| C | -0.015597000 | -1.363505000 | 1.240393000  |
| C | -1.435313000 | -1.818981000 | 1.596782000  |
| C | -1.115220000 | 0.784621000  | 0.479098000  |
| H | 0.719324000  | 0.716262000  | 1.563527000  |
| H | -1.713050000 | -1.438970000 | 2.590393000  |
| H | 0.686184000  | -1.614791000 | 2.039682000  |
| H | 0.320565000  | -1.914431000 | 0.352448000  |
| C | -1.040600000 | 2.271572000  | 0.249659000  |
| H | -1.480299000 | -2.910039000 | 1.658115000  |
| C | -0.542482000 | 3.091764000  | 1.455547000  |
| H | -0.635099000 | 4.159195000  | 1.234764000  |
| H | -1.142871000 | 2.880334000  | 2.344399000  |
| H | 0.505234000  | 2.891764000  | 1.691968000  |
| H | 0.477596000  | 0.032523000  | -1.450934000 |

## INTERMEDIATES

*cis*-4h, A

symmetry c1

|   |              |              |              |
|---|--------------|--------------|--------------|
| C | -4.792629000 | -1.449483000 | -0.276856000 |
| C | -3.671000000 | -2.073346000 | 0.274457000  |
| C | -2.459527000 | -1.395919000 | 0.389585000  |
| C | -2.382033000 | -0.025619000 | -0.047024000 |
| C | -3.554187000 | 0.590289000  | -0.591005000 |
| C | -4.733023000 | -0.115337000 | -0.718200000 |
| H | -5.722539000 | -2.003459000 | -0.366598000 |
| H | -3.740732000 | -3.101837000 | 0.615175000  |
| H | -3.518471000 | 1.613578000  | -0.943269000 |
| H | -5.608298000 | 0.354697000  | -1.153248000 |
| C | 1.216661000  | 0.529938000  | -0.645258000 |
| C | -1.079269000 | 2.179146000  | 0.064765000  |
| H | -2.008832000 | 2.605186000  | -0.316572000 |
| C | 0.065222000  | 2.563183000  | -0.924648000 |
| H | 0.234804000  | 3.641367000  | -0.879805000 |
| H | -0.217748000 | 2.292910000  | -1.952481000 |
| O | 1.274368000  | 1.938843000  | -0.559365000 |
| C | 2.575684000  | -0.055703000 | -0.362875000 |
| C | 3.135041000  | -0.984618000 | -1.249687000 |
| C | 3.295808000  | 0.325202000  | 0.779520000  |
| C | 4.395845000  | -1.532284000 | -0.997783000 |
| H | 2.593096000  | -1.274096000 | -2.146542000 |
| C | 4.556518000  | -0.216470000 | 1.027358000  |
| H | 2.884938000  | 1.065145000  | 1.460577000  |
| C | 5.106884000  | -1.149999000 | 0.141266000  |

|   |              |              |              |
|---|--------------|--------------|--------------|
| H | 4.822671000  | -2.247309000 | -1.694070000 |
| H | 5.113323000  | 0.092475000  | 1.906582000  |
| H | 6.088063000  | -1.571139000 | 0.337158000  |
| C | 0.024559000  | -1.549887000 | 0.348319000  |
| C | -1.256452000 | -2.047105000 | 1.013387000  |
| C | -1.167911000 | 0.689950000  | 0.137948000  |
| H | -1.339591000 | -3.135128000 | 0.937943000  |
| H | 0.039977000  | -1.886109000 | -0.696392000 |
| H | 0.905073000  | -1.979536000 | 0.830511000  |
| H | -1.243089000 | -1.814679000 | 2.089381000  |
| C | 0.114532000  | -0.019271000 | 0.391332000  |
| H | 0.494989000  | 0.316291000  | 1.366608000  |
| C | -0.820532000 | 2.801139000  | 1.465636000  |
| H | -0.892446000 | 3.888911000  | 1.379974000  |
| H | -1.564284000 | 2.469221000  | 2.195254000  |
| H | 0.176677000  | 2.553076000  | 1.833671000  |
| H | 0.886334000  | 0.226854000  | -1.650358000 |

*trans*-4h, A  
symmetry c1

|   |              |              |              |
|---|--------------|--------------|--------------|
| C | -4.191931000 | -1.684774000 | -0.620147000 |
| C | -3.520184000 | -1.721713000 | 0.603542000  |
| C | -2.397307000 | -0.928395000 | 0.830189000  |
| C | -1.947913000 | -0.044004000 | -0.213936000 |
| C | -2.667205000 | -0.018763000 | -1.450916000 |
| C | -3.761679000 | -0.833824000 | -1.654034000 |
| H | -5.055716000 | -2.324599000 | -0.775597000 |
| H | -3.872191000 | -2.382000000 | 1.390280000  |
| H | -2.338210000 | 0.623175000  | -2.258507000 |
| H | -4.286133000 | -0.820012000 | -2.603281000 |
| C | 1.538801000  | 0.948742000  | 0.939129000  |
| C | -0.551912000 | 2.018863000  | -0.816362000 |
| H | -0.989027000 | 1.901993000  | -1.810656000 |
| C | 0.975806000  | 2.244384000  | -0.978243000 |
| H | 1.153351000  | 3.240073000  | -1.390157000 |
| H | 1.398090000  | 1.502713000  | -1.667485000 |
| O | 1.627772000  | 2.208563000  | 0.274428000  |
| C | 2.320535000  | -0.153354000 | 0.243149000  |
| C | 3.672007000  | -0.310717000 | 0.588890000  |
| C | 1.787080000  | -0.974141000 | -0.761436000 |
| C | 4.471679000  | -1.250499000 | -0.062770000 |
| H | 4.103532000  | 0.315440000  | 1.365283000  |
| C | 2.584413000  | -1.914775000 | -1.418520000 |
| H | 0.737046000  | -0.904137000 | -1.035944000 |
| C | 3.929722000  | -2.053982000 | -1.069658000 |
| H | 5.515410000  | -1.355713000 | 0.216256000  |
| H | 2.153768000  | -2.541292000 | -2.193517000 |
| H | 4.549112000  | -2.789140000 | -1.573820000 |
| C | -0.205510000 | -0.671356000 | 1.996567000  |
| C | -1.698892000 | -0.940779000 | 2.162856000  |
| C | -0.844118000 | 0.820622000  | 0.030009000  |
| H | -1.873421000 | -1.896640000 | 2.665117000  |

|   |              |              |              |
|---|--------------|--------------|--------------|
| H | 0.261298000  | -1.501386000 | 1.457443000  |
| H | 0.284340000  | -0.610296000 | 2.973019000  |
| H | -2.155061000 | -0.170185000 | 2.804501000  |
| C | 0.018507000  | 0.638856000  | 1.233966000  |
| H | -0.265847000 | 1.480419000  | 1.891705000  |
| C | -1.217138000 | 3.273838000  | -0.164967000 |
| H | -1.121239000 | 4.110038000  | -0.862741000 |
| H | -2.280381000 | 3.113457000  | 0.032239000  |
| H | -0.713177000 | 3.542974000  | 0.765638000  |
| H | 2.003717000  | 1.131256000  | 1.910958000  |

*cis*-4h, B

symmetry c1

|   |              |              |              |
|---|--------------|--------------|--------------|
| C | -4.752716000 | -1.560628000 | 0.061510000  |
| C | -3.520052000 | -2.188765000 | 0.248667000  |
| C | -2.325729000 | -1.481152000 | 0.121869000  |
| C | -2.383942000 | -0.079517000 | -0.195006000 |
| C | -3.662333000 | 0.543064000  | -0.353323000 |
| C | -4.826051000 | -0.189361000 | -0.244543000 |
| H | -5.667283000 | -2.137554000 | 0.162897000  |
| H | -3.489079000 | -3.241992000 | 0.511530000  |
| H | -3.722839000 | 1.593275000  | -0.612178000 |
| H | -5.789253000 | 0.285670000  | -0.395674000 |
| C | 1.377603000  | 0.773470000  | -0.760260000 |
| C | -1.155796000 | 2.149299000  | -0.147456000 |
| H | -1.991997000 | 2.600162000  | -0.695155000 |
| C | 0.168990000  | 2.770531000  | -0.618573000 |
| H | 0.263196000  | 3.788203000  | -0.233268000 |
| H | 0.217936000  | 2.814610000  | -1.717076000 |
| O | 1.259294000  | 2.028564000  | -0.104187000 |
| C | 2.667034000  | 0.097811000  | -0.344151000 |
| C | 3.285834000  | -0.796411000 | -1.228315000 |
| C | 3.244636000  | 0.333885000  | 0.909952000  |
| C | 4.456883000  | -1.462418000 | -0.858181000 |
| H | 2.864983000  | -0.963403000 | -2.217746000 |
| C | 4.420822000  | -0.326017000 | 1.275254000  |
| H | 2.789076000  | 1.048744000  | 1.586869000  |
| C | 5.025477000  | -1.229341000 | 0.396797000  |
| H | 4.931444000  | -2.147240000 | -1.554215000 |
| H | 4.868642000  | -0.128176000 | 2.244412000  |
| H | 5.941147000  | -1.737591000 | 0.682586000  |
| C | -1.005259000 | -2.166099000 | 0.369061000  |
| C | 0.154602000  | -1.191084000 | 0.581919000  |
| C | 0.096213000  | -0.103960000 | -0.532269000 |
| C | -1.176589000 | 0.663122000  | -0.322380000 |
| H | 0.110826000  | -0.731378000 | 1.575637000  |
| H | 1.110938000  | -1.711394000 | 0.509069000  |
| H | -0.782104000 | -2.791598000 | -0.510302000 |
| H | -1.103653000 | -2.856228000 | 1.213201000  |
| H | -0.057229000 | -0.673862000 | -1.464814000 |
| C | -1.377781000 | 2.464319000  | 1.371666000  |
| H | -1.422535000 | 3.550899000  | 1.485051000  |

|   |              |             |              |
|---|--------------|-------------|--------------|
| H | -2.307812000 | 2.033225000 | 1.746240000  |
| H | -0.542089000 | 2.091326000 | 1.967589000  |
| H | 1.432241000  | 0.961295000 | -1.844577000 |

*trans*-4h, B  
symmetry c1

|   |              |              |              |
|---|--------------|--------------|--------------|
| C | -4.927067000 | -1.087482000 | -0.487774000 |
| C | -3.896664000 | -1.859630000 | 0.050893000  |
| C | -2.609408000 | -1.344023000 | 0.191064000  |
| C | -2.353760000 | 0.012745000  | -0.218796000 |
| C | -3.431594000 | 0.773054000  | -0.779259000 |
| C | -4.693096000 | 0.233754000  | -0.911597000 |
| H | -5.921388000 | -1.514098000 | -0.582895000 |
| H | -4.098432000 | -2.878346000 | 0.367774000  |
| H | -3.259593000 | 1.786520000  | -1.118681000 |
| H | -5.498216000 | 0.820331000  | -1.340442000 |
| C | 1.388329000  | 0.417651000  | 0.837321000  |
| C | -0.775188000 | 2.010879000  | -0.425903000 |
| H | -1.252107000 | 2.256105000  | -1.382677000 |
| C | 0.739139000  | 2.245207000  | -0.526031000 |
| H | 0.949593000  | 3.310492000  | -0.642395000 |
| H | 1.178987000  | 1.713342000  | -1.381676000 |
| O | 1.331724000  | 1.835687000  | 0.694791000  |
| C | 2.669868000  | -0.145445000 | 0.209001000  |
| C | 3.818396000  | 0.661450000  | 0.209631000  |
| C | 2.768731000  | -1.449099000 | -0.299006000 |
| C | 5.025841000  | 0.183274000  | -0.301981000 |
| H | 3.760014000  | 1.668906000  | 0.606994000  |
| C | 3.979253000  | -1.929823000 | -0.808706000 |
| H | 1.915451000  | -2.121866000 | -0.297282000 |
| C | 5.111005000  | -1.113929000 | -0.814421000 |
| H | 5.901291000  | 0.825436000  | -0.297210000 |
| H | 4.033294000  | -2.941834000 | -1.198229000 |
| H | 6.050617000  | -1.486016000 | -1.210551000 |
| C | -1.503911000 | -2.209452000 | 0.730584000  |
| C | -0.369335000 | -1.388276000 | 1.335237000  |
| C | 0.083399000  | -0.290821000 | 0.353279000  |
| C | -1.056498000 | 0.578846000  | -0.080658000 |
| H | -0.693388000 | -0.915160000 | 2.270614000  |
| H | 0.479689000  | -2.030846000 | 1.581813000  |
| H | -1.111276000 | -2.810999000 | -0.105824000 |
| H | -1.909216000 | -2.924235000 | 1.453193000  |
| H | 0.325229000  | -0.790222000 | -0.609661000 |
| C | -1.373281000 | 2.950844000  | 0.672085000  |
| H | -1.205046000 | 3.985163000  | 0.359130000  |
| H | -2.444251000 | 2.797233000  | 0.812148000  |
| H | -0.863221000 | 2.794907000  | 1.624382000  |
| H | 1.443231000  | 0.271345000  | 1.923377000  |

**PRODUCTS***cis*-7h, A

symmetry c1

|   |              |              |              |
|---|--------------|--------------|--------------|
| C | -4.740495000 | -1.468807000 | 0.264218000  |
| C | -3.526189000 | -2.147210000 | 0.123616000  |
| C | -2.325333000 | -1.454020000 | -0.038705000 |
| C | -2.324889000 | -0.037469000 | -0.066565000 |
| C | -3.554306000 | 0.629482000  | 0.080635000  |
| C | -4.749674000 | -0.074008000 | 0.243286000  |
| H | -5.665610000 | -2.024536000 | 0.386932000  |
| H | -3.509912000 | -3.234630000 | 0.140588000  |
| H | -3.590567000 | 1.713240000  | 0.064632000  |
| H | -5.683680000 | 0.470110000  | 0.350911000  |
| C | 1.389513000  | 0.716690000  | -0.920912000 |
| C | -0.982008000 | 2.188711000  | -0.000011000 |
| H | -1.877593000 | 2.647974000  | -0.439861000 |
| C | 0.214174000  | 2.772523000  | -0.756055000 |
| H | 0.400242000  | 3.811124000  | -0.466271000 |
| H | 0.029803000  | 2.743768000  | -1.842468000 |
| O | 1.408984000  | 2.063310000  | -0.446987000 |
| C | 2.569551000  | 0.008246000  | -0.270254000 |
| C | 3.651604000  | -0.426637000 | -1.042158000 |
| C | 2.598474000  | -0.199606000 | 1.115821000  |
| C | 4.744217000  | -1.065317000 | -0.445868000 |
| H | 3.643668000  | -0.261365000 | -2.116885000 |
| C | 3.688062000  | -0.831626000 | 1.715348000  |
| H | 1.764344000  | 0.139789000  | 1.722604000  |
| C | 4.764387000  | -1.269186000 | 0.934973000  |
| H | 5.577149000  | -1.397064000 | -1.059310000 |
| H | 3.699087000  | -0.984047000 | 2.791014000  |
| H | 5.611850000  | -1.762753000 | 1.402076000  |
| C | -0.032884000 | -1.439594000 | -1.064242000 |
| C | -1.004415000 | -2.180908000 | -0.143352000 |
| C | -1.040047000 | 0.688001000  | -0.248078000 |
| H | -1.160431000 | -3.207950000 | -0.490748000 |
| H | -0.377342000 | -1.518077000 | -2.108357000 |
| H | 0.952956000  | -1.912135000 | -1.024633000 |
| H | -0.555275000 | -2.250626000 | 0.859525000  |
| C | 0.056595000  | 0.023488000  | -0.682299000 |
| C | -0.946143000 | 2.546978000  | 1.498964000  |
| H | -1.031826000 | 3.630867000  | 1.639595000  |
| H | -1.765102000 | 2.068530000  | 2.044504000  |
| H | -0.002505000 | 2.220258000  | 1.945923000  |
| H | 1.567702000  | 0.722648000  | -2.014060000 |

*trans*-7h, A

symmetry c1

|   |             |              |              |
|---|-------------|--------------|--------------|
| C | 4.714000000 | -1.326016000 | 0.617308000  |
| C | 3.806529000 | -1.819519000 | -0.325092000 |
| C | 2.582110000 | -1.187270000 | -0.548343000 |
| C | 2.243046000 | -0.025327000 | 0.188028000  |
| C | 3.167177000 | 0.459734000  | 1.129758000  |

|   |              |              |              |
|---|--------------|--------------|--------------|
| C | 4.389228000  | -0.181174000 | 1.345440000  |
| H | 5.661071000  | -1.832307000 | 0.779990000  |
| H | 4.053725000  | -2.710802000 | -0.897407000 |
| H | 2.935230000  | 1.345004000  | 1.712523000  |
| H | 5.081848000  | 0.214482000  | 2.082818000  |
| C | -1.413024000 | 0.547526000  | -0.958129000 |
| C | 0.702480000  | 2.060850000  | 0.409277000  |
| H | 1.082570000  | 2.168888000  | 1.434481000  |
| C | -0.800105000 | 2.352333000  | 0.474133000  |
| H | -0.988544000 | 3.424868000  | 0.578236000  |
| H | -1.255846000 | 1.841098000  | 1.334792000  |
| O | -1.452317000 | 1.962798000  | -0.732326000 |
| C | -2.562118000 | -0.150087000 | -0.223630000 |
| C | -3.840868000 | -0.137334000 | -0.800360000 |
| C | -2.398474000 | -0.755527000 | 1.029829000  |
| C | -4.930659000 | -0.708534000 | -0.141858000 |
| H | -3.981399000 | 0.332531000  | -1.770795000 |
| C | -3.487953000 | -1.327168000 | 1.694656000  |
| H | -1.413320000 | -0.788642000 | 1.486577000  |
| C | -4.756470000 | -1.305334000 | 1.111052000  |
| H | -5.913177000 | -0.690283000 | -0.605120000 |
| H | -3.342954000 | -1.792461000 | 2.665683000  |
| H | -5.602275000 | -1.752942000 | 1.625127000  |
| C | 0.163342000  | -1.481036000 | -1.143705000 |
| C | 1.611934000  | -1.685904000 | -1.594975000 |
| C | 0.929914000  | 0.628231000  | -0.052390000 |
| H | 1.803087000  | -2.740159000 | -1.822148000 |
| H | -0.075653000 | -2.178552000 | -0.326570000 |
| H | -0.526398000 | -1.724140000 | -1.960377000 |
| H | 1.776135000  | -1.124320000 | -2.527837000 |
| C | -0.053428000 | -0.055030000 | -0.681495000 |
| C | 1.443201000  | 3.073508000  | -0.488122000 |
| H | 1.359052000  | 4.086540000  | -0.077686000 |
| H | 2.506274000  | 2.829735000  | -0.574246000 |
| H | 1.011139000  | 3.074523000  | -1.493590000 |
| H | -1.611189000 | 0.453019000  | -2.034145000 |

*cis*-7h, B

symmetry c1

|   |              |              |              |
|---|--------------|--------------|--------------|
| C | -4.762351000 | -1.281285000 | 0.619633000  |
| C | -3.729557000 | -1.980874000 | -0.011824000 |
| C | -2.516184000 | -1.360460000 | -0.315194000 |
| C | -2.313620000 | -0.001161000 | 0.027413000  |
| C | -3.369321000 | 0.694238000  | 0.643491000  |
| C | -4.579675000 | 0.063994000  | 0.940654000  |
| H | -5.698348000 | -1.781116000 | 0.851612000  |
| H | -3.870609000 | -3.025308000 | -0.280825000 |
| H | -3.251990000 | 1.740360000  | 0.902569000  |
| H | -5.374239000 | 0.625436000  | 1.423863000  |
| C | 1.401300000  | 0.486545000  | -0.994507000 |
| C | -0.893839000 | 2.163642000  | -0.274800000 |
| H | -1.819662000 | 2.589091000  | -0.686489000 |

|   |              |              |              |
|---|--------------|--------------|--------------|
| C | 0.252284000  | 2.562237000  | -1.209955000 |
| H | 0.468087000  | 3.632975000  | -1.145008000 |
| H | -0.000628000 | 2.319713000  | -2.254482000 |
| O | 1.457934000  | 1.903787000  | -0.828919000 |
| C | 2.567092000  | -0.102561000 | -0.211997000 |
| C | 3.667855000  | -0.644508000 | -0.883623000 |
| C | 2.567832000  | -0.090641000 | 1.189878000  |
| C | 4.751294000  | -1.171255000 | -0.172946000 |
| H | 3.681542000  | -0.649521000 | -1.970904000 |
| C | 3.648031000  | -0.610997000 | 1.903066000  |
| H | 1.718544000  | 0.329160000  | 1.721124000  |
| C | 4.743219000  | -1.155335000 | 1.222889000  |
| H | 5.598676000  | -1.588320000 | -0.709717000 |
| H | 3.636245000  | -0.594346000 | 2.989310000  |
| H | 5.582989000  | -1.562532000 | 1.778745000  |
| C | -1.431898000 | -2.084637000 | -1.080587000 |
| C | -0.035377000 | -1.623022000 | -0.659992000 |
| C | 0.056379000  | -0.112821000 | -0.619771000 |
| C | -1.015443000 | 0.645313000  | -0.293329000 |
| H | 0.214558000  | -2.026004000 | 0.333205000  |
| H | 0.717745000  | -2.030338000 | -1.344623000 |
| H | -1.566217000 | -1.875712000 | -2.153665000 |
| H | -1.534734000 | -3.168232000 | -0.957491000 |
| C | -0.664724000 | 2.749551000  | 1.136072000  |
| H | 0.333088000  | 2.483120000  | 1.495618000  |
| H | -0.734431000 | 3.843482000  | 1.111719000  |
| H | -1.393217000 | 2.380361000  | 1.862626000  |
| H | 1.569353000  | 0.251664000  | -2.063264000 |

*trans*-7h, B

symmetry c1

|   |              |              |              |
|---|--------------|--------------|--------------|
| C | 4.745150000  | -1.417921000 | 0.337440000  |
| C | 3.603933000  | -2.079827000 | -0.124621000 |
| C | 2.380983000  | -1.416785000 | -0.244609000 |
| C | 2.285525000  | -0.044252000 | 0.094287000  |
| C | 3.438335000  | 0.601304000  | 0.577329000  |
| C | 4.655380000  | -0.072791000 | 0.696270000  |
| H | 5.688781000  | -1.949306000 | 0.420532000  |
| H | 3.661545000  | -3.132846000 | -0.391111000 |
| H | 3.395359000  | 1.645474000  | 0.864958000  |
| H | 5.529058000  | 0.455823000  | 1.066744000  |
| C | -1.388785000 | 0.723605000  | -0.886258000 |
| C | 0.800048000  | 2.050045000  | 0.541438000  |
| H | 1.289577000  | 2.092885000  | 1.524262000  |
| C | -0.692925000 | 2.311480000  | 0.760099000  |
| H | -0.877086000 | 3.357136000  | 1.023818000  |
| H | -1.086467000 | 1.679316000  | 1.569199000  |
| O | -1.420514000 | 2.088730000  | -0.446961000 |
| C | -2.544328000 | -0.057776000 | -0.250979000 |
| C | -3.814381000 | 0.015935000  | -0.841284000 |
| C | -2.398191000 | -0.792801000 | 0.933708000  |
| C | -4.913100000 | -0.622409000 | -0.263541000 |

|   |              |              |              |
|---|--------------|--------------|--------------|
| H | -3.941727000 | 0.585699000  | -1.758583000 |
| C | -3.496391000 | -1.431581000 | 1.517753000  |
| H | -1.419836000 | -0.874523000 | 1.398401000  |
| C | -4.756626000 | -1.348579000 | 0.921097000  |
| H | -5.888566000 | -0.555257000 | -0.737073000 |
| H | -3.364923000 | -1.997152000 | 2.436096000  |
| H | -5.609000000 | -1.848330000 | 1.372408000  |
| C | 1.128270000  | -2.159926000 | -0.652579000 |
| C | 0.153410000  | -1.260760000 | -1.413439000 |
| C | -0.036222000 | 0.067204000  | -0.712123000 |
| C | 0.980292000  | 0.653183000  | -0.038954000 |
| H | 0.536243000  | -1.066708000 | -2.428761000 |
| H | -0.807398000 | -1.770947000 | -1.538707000 |
| H | 0.630683000  | -2.529520000 | 0.257697000  |
| H | 1.385031000  | -3.043437000 | -1.247023000 |
| C | 1.403413000  | 3.145316000  | -0.367440000 |
| H | 1.380466000  | 4.117574000  | 0.138910000  |
| H | 2.438373000  | 2.932263000  | -0.645983000 |
| H | 0.818495000  | 3.227339000  | -1.288174000 |
| H | -1.597234000 | 0.788690000  | -1.963478000 |

*cis*-12h, A

symmetry c1

|   |              |              |              |
|---|--------------|--------------|--------------|
| C | 4.708180000  | -1.721093000 | 0.162062000  |
| C | 3.516731000  | -2.242237000 | -0.341304000 |
| C | 2.354081000  | -1.467756000 | -0.420857000 |
| C | 2.375037000  | -0.107885000 | -0.013351000 |
| C | 3.572325000  | 0.374762000  | 0.560037000  |
| C | 4.722184000  | -0.409115000 | 0.638205000  |
| H | 5.599425000  | -2.339654000 | 0.214763000  |
| H | 3.475679000  | -3.280229000 | -0.663410000 |
| H | 3.605298000  | 1.366113000  | 0.987605000  |
| H | 5.622186000  | 0.003562000  | 1.085364000  |
| C | -1.311696000 | 0.744126000  | 0.393218000  |
| C | 1.100148000  | 2.080281000  | -0.114641000 |
| C | -0.219815000 | 2.822513000  | -0.100478000 |
| H | -0.264677000 | 3.520929000  | -0.946733000 |
| H | -0.243329000 | 3.442364000  | 0.816308000  |
| O | -1.406285000 | 2.051379000  | -0.178686000 |
| C | -2.677540000 | 0.101596000  | 0.273810000  |
| C | -3.221605000 | -0.613090000 | 1.348043000  |
| C | -3.410367000 | 0.191278000  | -0.918448000 |
| C | -4.466063000 | -1.239762000 | 1.233559000  |
| H | -2.670630000 | -0.677853000 | 2.283317000  |
| C | -4.655560000 | -0.429668000 | -1.034229000 |
| H | -3.008637000 | 0.766240000  | -1.746649000 |
| C | -5.186476000 | -1.150691000 | 0.040235000  |
| H | -4.873851000 | -1.788814000 | 2.077673000  |
| H | -5.214453000 | -0.347052000 | -1.962322000 |
| H | -6.155993000 | -1.632216000 | -0.050231000 |
| C | -0.102770000 | -1.507616000 | -0.039239000 |
| C | 1.052601000  | -2.104899000 | -0.848061000 |

|   |              |              |              |
|---|--------------|--------------|--------------|
| C | 1.146595000  | 0.724353000  | -0.140526000 |
| H | 1.112419000  | -3.189929000 | -0.709552000 |
| H | 0.071171000  | -1.679198000 | 1.031936000  |
| H | -1.047900000 | -1.993619000 | -0.298389000 |
| H | 0.863505000  | -1.935904000 | -1.918953000 |
| C | -0.189313000 | -0.011814000 | -0.348803000 |
| H | -0.450436000 | 0.064690000  | -1.415893000 |
| C | 2.260304000  | 3.050744000  | -0.088843000 |
| H | 2.588126000  | 3.292801000  | 0.931126000  |
| H | 3.125975000  | 2.674902000  | -0.638750000 |
| H | 1.960339000  | 3.999068000  | -0.550553000 |
| H | -1.045825000 | 0.818615000  | 1.460496000  |

*trans*-12h, A

symmetry c1

|   |              |              |              |
|---|--------------|--------------|--------------|
| C | -4.414364000 | -1.133933000 | -0.868750000 |
| C | -3.804459000 | -1.416694000 | 0.353024000  |
| C | -2.608047000 | -0.800568000 | 0.736760000  |
| C | -1.999972000 | 0.162039000  | -0.113987000 |
| C | -2.599596000 | 0.379044000  | -1.374560000 |
| C | -3.789284000 | -0.245740000 | -1.745097000 |
| H | -5.342889000 | -1.624868000 | -1.145368000 |
| H | -4.252919000 | -2.147544000 | 1.022074000  |
| H | -2.116893000 | 1.019630000  | -2.098092000 |
| H | -4.216051000 | -0.047431000 | -2.724240000 |
| C | 1.540404000  | 0.417236000  | 1.355176000  |
| C | -0.232808000 | 1.985340000  | -0.208864000 |
| C | 1.136900000  | 2.490164000  | 0.201416000  |
| H | 1.071011000  | 3.542690000  | 0.503827000  |
| H | 1.784633000  | 2.459931000  | -0.694985000 |
| O | 1.776817000  | 1.834364000  | 1.284157000  |
| C | 2.306814000  | -0.335133000 | 0.267984000  |
| C | 3.695802000  | -0.463736000 | 0.436793000  |
| C | 1.728294000  | -0.879798000 | -0.887126000 |
| C | 4.485039000  | -1.109896000 | -0.514899000 |
| H | 4.160725000  | -0.044733000 | 1.325888000  |
| C | 2.515020000  | -1.533087000 | -1.842119000 |
| H | 0.660234000  | -0.799659000 | -1.052072000 |
| C | 3.894302000  | -1.649394000 | -1.661790000 |
| H | 5.556866000  | -1.196698000 | -0.359929000 |
| H | 2.044164000  | -1.951352000 | -2.727474000 |
| H | 4.502912000  | -2.157828000 | -2.404188000 |
| C | -0.405127000 | -1.221133000 | 1.814050000  |
| C | -1.923532000 | -1.227999000 | 2.016221000  |
| C | -0.743599000 | 0.840002000  | 0.309635000  |
| H | -2.280447000 | -2.221945000 | 2.307183000  |
| H | -0.136769000 | -1.921539000 | 1.014921000  |
| H | 0.109561000  | -1.554362000 | 2.723428000  |
| H | -2.179469000 | -0.548565000 | 2.843193000  |
| C | 0.025419000  | 0.209726000  | 1.483117000  |
| H | -0.236606000 | 0.801561000  | 2.373592000  |
| C | -0.857442000 | 2.891154000  | -1.246342000 |

|   |              |             |              |
|---|--------------|-------------|--------------|
| H | -0.609138000 | 2.591007000 | -2.273639000 |
| H | -1.945998000 | 2.927714000 | -1.161963000 |
| H | -0.480446000 | 3.913046000 | -1.122694000 |
| H | 1.994393000  | 0.140459000 | 2.313427000  |

*cis*-12h, B

symmetry c1

|   |              |              |              |
|---|--------------|--------------|--------------|
| C | 4.637695000  | -1.804954000 | 0.130106000  |
| C | 3.443655000  | -2.211785000 | -0.464511000 |
| C | 2.300729000  | -1.400814000 | -0.445931000 |
| C | 2.370970000  | -0.127121000 | 0.167204000  |
| C | 3.571355000  | 0.254982000  | 0.797045000  |
| C | 4.695728000  | -0.568470000 | 0.778900000  |
| H | 5.509063000  | -2.452980000 | 0.101851000  |
| H | 3.390520000  | -3.184126000 | -0.950068000 |
| H | 3.612192000  | 1.196953000  | 1.332829000  |
| H | 5.608114000  | -0.250423000 | 1.275269000  |
| C | -1.354120000 | 0.829437000  | 0.477742000  |
| C | 1.125178000  | 2.063264000  | -0.039160000 |
| C | -0.204330000 | 2.784944000  | -0.143148000 |
| H | -0.171359000 | 3.497720000  | -0.974519000 |
| H | -0.394182000 | 3.370509000  | 0.776843000  |
| O | -1.313350000 | 1.941782000  | -0.410423000 |
| C | -2.689849000 | 0.125138000  | 0.341407000  |
| C | -3.109013000 | -0.757567000 | 1.347193000  |
| C | -3.515381000 | 0.322213000  | -0.772246000 |
| C | -4.322441000 | -1.440166000 | 1.238530000  |
| H | -2.486564000 | -0.907780000 | 2.226640000  |
| C | -4.732415000 | -0.357505000 | -0.880166000 |
| H | -3.203056000 | 1.016591000  | -1.544154000 |
| C | -5.139290000 | -1.242632000 | 0.121162000  |
| H | -4.632829000 | -2.118147000 | 2.028698000  |
| H | -5.364270000 | -0.191810000 | -1.748472000 |
| H | -6.085864000 | -1.768657000 | 0.036186000  |
| C | 1.007297000  | -1.939153000 | -1.041735000 |
| C | -0.178707000 | -0.957257000 | -1.035159000 |
| C | -0.132271000 | -0.082454000 | 0.232808000  |
| C | 1.155833000  | 0.726965000  | 0.160273000  |
| H | -0.144700000 | -0.303395000 | -1.913848000 |
| H | -1.115762000 | -1.520643000 | -1.088698000 |
| H | 0.728488000  | -2.831837000 | -0.463402000 |
| H | 1.194289000  | -2.295842000 | -2.062296000 |
| H | -0.066189000 | -0.755454000 | 1.101418000  |
| C | 2.321065000  | 2.966746000  | -0.225796000 |
| H | 2.582794000  | 3.496623000  | 0.700559000  |
| H | 3.206857000  | 2.420427000  | -0.555150000 |
| H | 2.102005000  | 3.736956000  | -0.975260000 |
| H | -1.272879000 | 1.208200000  | 1.511844000  |

*trans*-12h, B

symmetry c1

|   |             |              |              |
|---|-------------|--------------|--------------|
| C | 4.629398000 | -0.841572000 | -1.114439000 |
|---|-------------|--------------|--------------|

|   |              |              |              |
|---|--------------|--------------|--------------|
| C | 4.072633000  | 0.434230000  | -1.197821000 |
| C | 2.805299000  | 0.717742000  | -0.670672000 |
| C | 2.087135000  | -0.308628000 | -0.012515000 |
| C | 2.645158000  | -1.601460000 | 0.030345000  |
| C | 3.901897000  | -1.869845000 | -0.509077000 |
| H | 5.613338000  | -1.035506000 | -1.531828000 |
| H | 4.627857000  | 1.230645000  | -1.689171000 |
| H | 2.072167000  | -2.411372000 | 0.468318000  |
| H | 4.306571000  | -2.876947000 | -0.464462000 |
| C | -1.445202000 | 1.271197000  | 0.215503000  |
| C | 0.268281000  | -0.434926000 | 1.738905000  |
| C | -1.075609000 | 0.055221000  | 2.235183000  |
| H | -1.019992000 | 0.257722000  | 3.310149000  |
| H | -1.841874000 | -0.727711000 | 2.092639000  |
| O | -1.504395000 | 1.277554000  | 1.651587000  |
| C | -2.487851000 | 0.318126000  | -0.369184000 |
| C | -3.837256000 | 0.700633000  | -0.298634000 |
| C | -2.178026000 | -0.922988000 | -0.941665000 |
| C | -4.848560000 | -0.127660000 | -0.785938000 |
| H | -4.092780000 | 1.658453000  | 0.147875000  |
| C | -3.188813000 | -1.757399000 | -1.431519000 |
| H | -1.145492000 | -1.250642000 | -1.007286000 |
| C | -4.525850000 | -1.363501000 | -1.356021000 |
| H | -5.885350000 | 0.191347000  | -0.725487000 |
| H | -2.927180000 | -2.715359000 | -1.872337000 |
| H | -5.309493000 | -2.010324000 | -1.740126000 |
| C | 2.222330000  | 2.109807000  | -0.869950000 |
| C | 0.852595000  | 2.343942000  | -0.208809000 |
| C | 0.001871000  | 1.057200000  | -0.253701000 |
| C | 0.752382000  | 0.009731000  | 0.557869000  |
| H | 0.970375000  | 2.647725000  | 0.837418000  |
| H | 0.336602000  | 3.162638000  | -0.725871000 |
| H | 2.124524000  | 2.270405000  | -1.953214000 |
| H | 2.941497000  | 2.862556000  | -0.523692000 |
| H | -0.033231000 | 0.728050000  | -1.302276000 |
| C | 0.958322000  | -1.385982000 | 2.687401000  |
| H | 0.560457000  | -2.406836000 | 2.602096000  |
| H | 2.035624000  | -1.435491000 | 2.520005000  |
| H | 0.791500000  | -1.071861000 | 3.724845000  |
| H | -1.750762000 | 2.288869000  | -0.051855000 |

7s

symmetry c1

|   |              |              |              |
|---|--------------|--------------|--------------|
| C | -4.638861000 | -0.602377000 | 0.249785000  |
| C | -3.619592000 | -1.556802000 | 0.194321000  |
| C | -2.285369000 | -1.181133000 | 0.026817000  |
| C | -1.941776000 | 0.188538000  | -0.094722000 |
| C | -2.981637000 | 1.135538000  | -0.031429000 |
| C | -4.312543000 | 0.749445000  | 0.137208000  |
| C | -0.515793000 | 0.578481000  | -0.252809000 |
| C | 0.424267000  | -0.358087000 | -0.543328000 |
| H | -5.672000000 | -0.912239000 | 0.377481000  |

|   |              |              |              |
|---|--------------|--------------|--------------|
| H | -3.863155000 | -2.613364000 | 0.280947000  |
| H | -2.760629000 | 2.193752000  | -0.113678000 |
| H | -5.090353000 | 1.506621000  | 0.178953000  |
| C | -1.179166000 | -2.209140000 | 0.000186000  |
| H | -0.785107000 | -2.343874000 | 1.020289000  |
| H | -1.570860000 | -3.181269000 | -0.318730000 |
| C | -0.046092000 | -1.754029000 | -0.918683000 |
| H | -0.417306000 | -1.719076000 | -1.956180000 |
| H | 0.763451000  | -2.480826000 | -0.913478000 |
| C | 1.899165000  | -0.025408000 | -0.708299000 |
| H | 2.193547000  | -0.369568000 | -1.720603000 |
| C | -0.140373000 | 2.051666000  | -0.217562000 |
| H | -0.929836000 | 2.611315000  | -0.736862000 |
| C | 1.122418000  | 2.229442000  | -1.062046000 |
| H | 1.519135000  | 3.246665000  | -0.980667000 |
| H | 0.894934000  | 2.030551000  | -2.122029000 |
| O | 2.162165000  | 1.378063000  | -0.610814000 |
| C | -0.001287000 | 2.638480000  | 1.199420000  |
| H | 0.169242000  | 3.720676000  | 1.153899000  |
| H | -0.906269000 | 2.463325000  | 1.789635000  |
| H | 0.839077000  | 2.182522000  | 1.728512000  |
| C | 2.926448000  | -0.683372000 | 0.295485000  |
| C | 2.924784000  | -2.224280000 | 0.239652000  |
| H | 3.785844000  | -2.602148000 | 0.802216000  |
| H | 2.030574000  | -2.660500000 | 0.693503000  |
| H | 3.016977000  | -2.599671000 | -0.786455000 |
| C | 2.638875000  | -0.238295000 | 1.741313000  |
| H | 1.631130000  | -0.528402000 | 2.057856000  |
| H | 3.354379000  | -0.706812000 | 2.426922000  |
| H | 2.732126000  | 0.845449000  | 1.844091000  |
| C | 4.339091000  | -0.207855000 | -0.116033000 |
| H | 5.087698000  | -0.641828000 | 0.556516000  |
| H | 4.580634000  | -0.530004000 | -1.136587000 |
| H | 4.424084000  | 0.879333000  | -0.074700000 |

12s

symmetry c1

|   |              |              |              |
|---|--------------|--------------|--------------|
| C | -4.510766000 | -0.952518000 | 0.553385000  |
| C | -3.534499000 | -1.699876000 | -0.103471000 |
| C | -2.244715000 | -1.194151000 | -0.315750000 |
| C | -1.930380000 | 0.113494000  | 0.120196000  |
| C | -2.916288000 | 0.840849000  | 0.817352000  |
| C | -4.191940000 | 0.322925000  | 1.029090000  |
| H | -5.503513000 | -1.365705000 | 0.707381000  |
| H | -3.770579000 | -2.701768000 | -0.456261000 |
| H | -2.665333000 | 1.814103000  | 1.224213000  |
| H | -4.929659000 | 0.906651000  | 1.572343000  |
| C | -1.199461000 | -2.080428000 | -0.968271000 |
| H | -0.992399000 | -2.918139000 | -0.286016000 |
| H | -1.611826000 | -2.533800000 | -1.878538000 |
| C | 0.115889000  | -1.360814000 | -1.286590000 |
| H | 0.006903000  | -0.761664000 | -2.200186000 |

|   |              |              |              |
|---|--------------|--------------|--------------|
| H | 0.893920000  | -2.101858000 | -1.487185000 |
| C | 1.956340000  | 0.155907000  | -0.323565000 |
| H | 2.173126000  | 0.174709000  | -1.408318000 |
| C | 1.157519000  | 2.385091000  | -0.467739000 |
| H | 1.289378000  | 3.350980000  | 0.035816000  |
| H | 1.446873000  | 2.533117000  | -1.526890000 |
| O | 2.050249000  | 1.495289000  | 0.165785000  |
| C | -1.268386000 | 3.063389000  | -0.650612000 |
| H | -0.896109000 | 3.686011000  | -1.475503000 |
| H | -2.256849000 | 2.694181000  | -0.929353000 |
| H | -1.384991000 | 3.732922000  | 0.212868000  |
| C | 3.110467000  | -0.630696000 | 0.373822000  |
| C | 3.115590000  | -2.113272000 | -0.047044000 |
| H | 3.980146000  | -2.616578000 | 0.400125000  |
| H | 2.220203000  | -2.644847000 | 0.290847000  |
| H | 3.196086000  | -2.227667000 | -1.134420000 |
| C | 2.990654000  | -0.540674000 | 1.909858000  |
| H | 2.073510000  | -1.012348000 | 2.278958000  |
| H | 3.835530000  | -1.057656000 | 2.379111000  |
| H | 2.995311000  | 0.499727000  | 2.243562000  |
| C | 4.450934000  | 0.000819000  | -0.062072000 |
| H | 5.289886000  | -0.530591000 | 0.401571000  |
| H | 4.579146000  | -0.058704000 | -1.150037000 |
| H | 4.504704000  | 1.052434000  | 0.229387000  |
| H | 0.480061000  | -0.973596000 | 0.806796000  |
| C | 0.524742000  | -0.408181000 | -0.134500000 |
| C | -0.285840000 | 1.953048000  | -0.373796000 |
| C | -0.565780000 | 0.661384000  | -0.099718000 |

## Part 3: Selected-NMR Spectra

 $^1\text{H}$ -NMR of compound *cis-7c* (300 MHz,  $\text{CDCl}_3$ )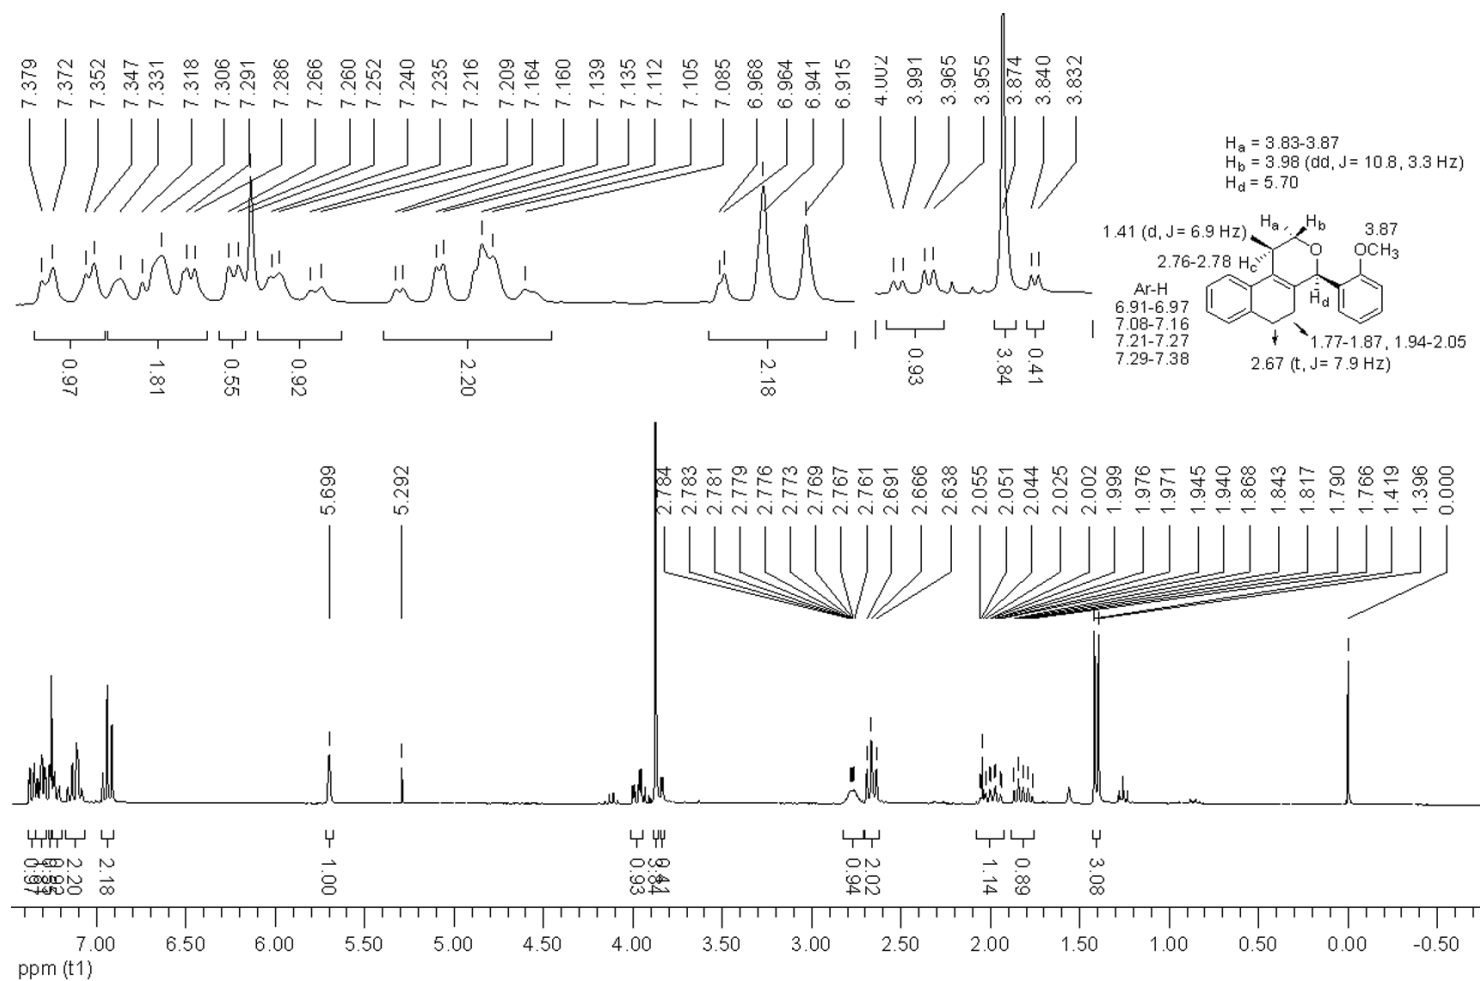

$^{13}\text{C}$ -NMR of compound *cis*-7c (75 MHz,  $\text{CDCl}_3$ )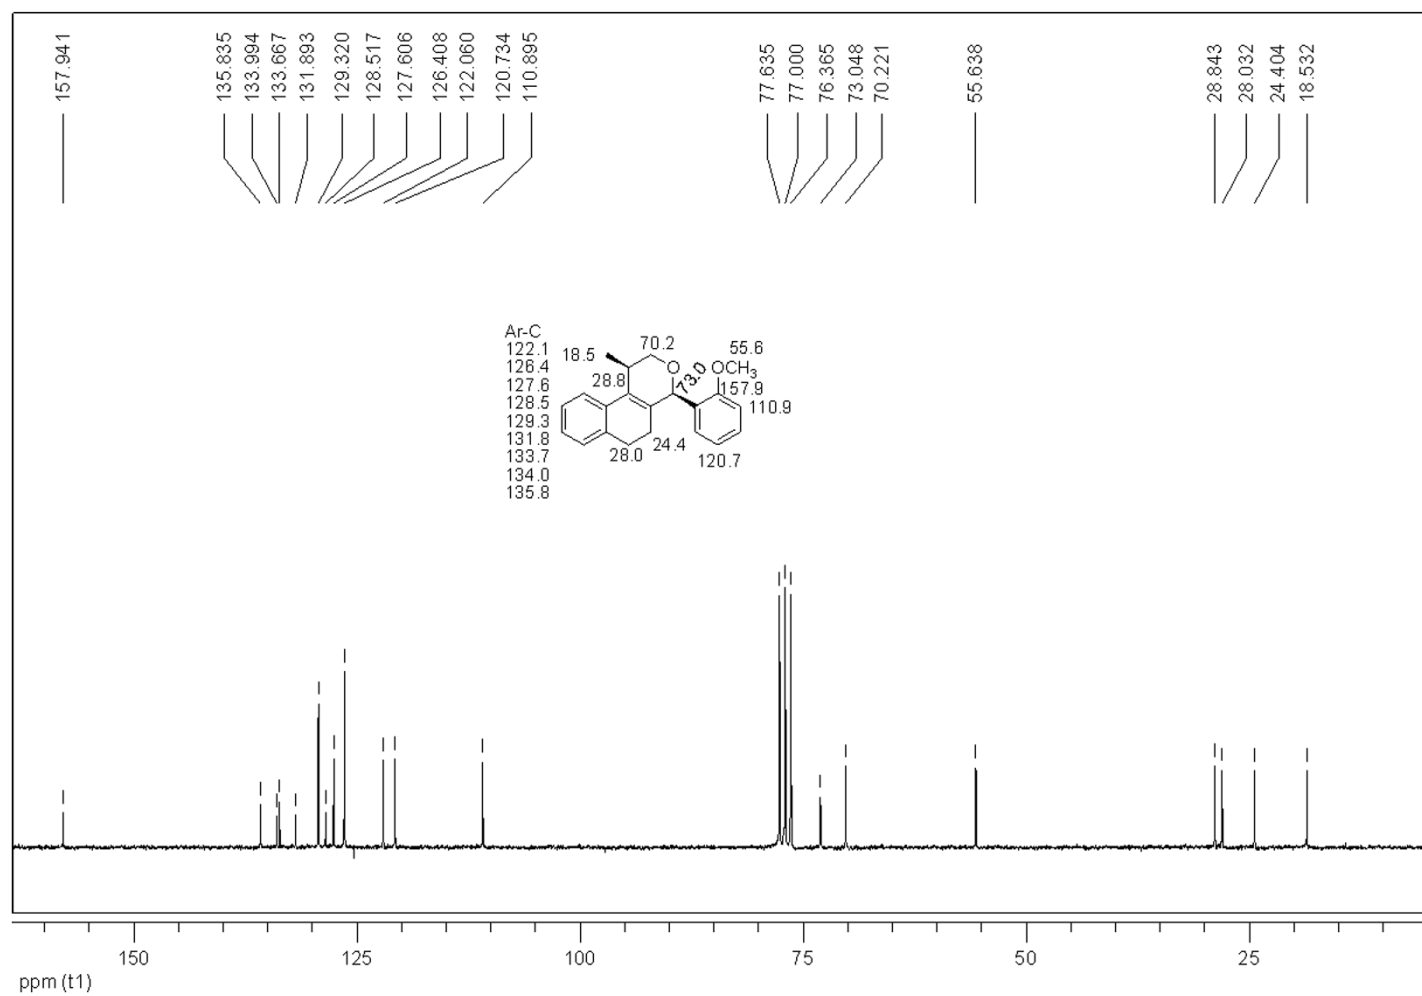

2D NOESY-NMR of compound *cis-7c* (300 MHz, CDCl<sub>3</sub>)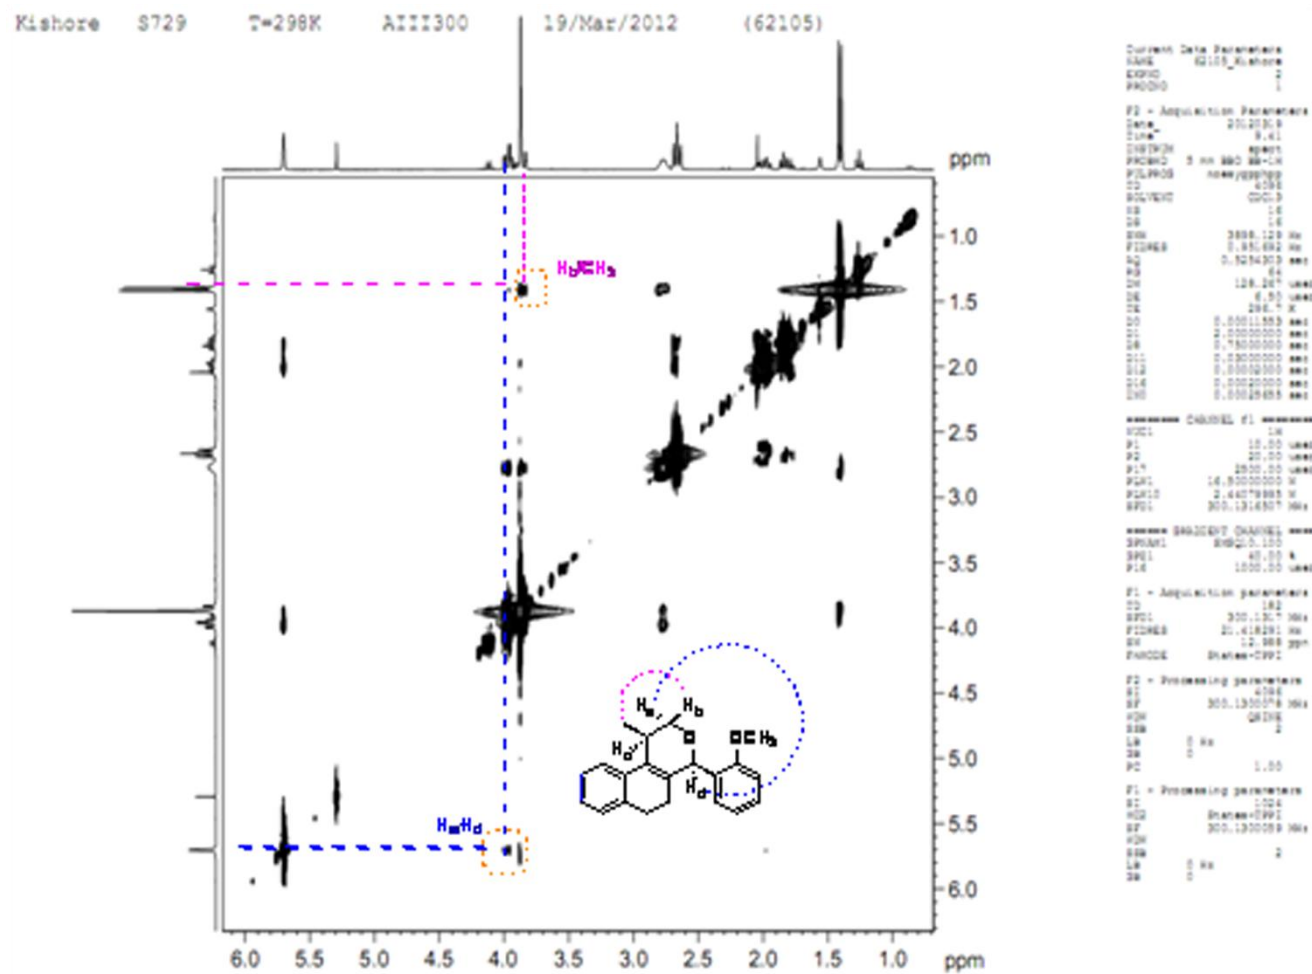

$^1\text{H}$ -NMR of compound *trans*-7c (300 MHz,  $\text{CDCl}_3$ )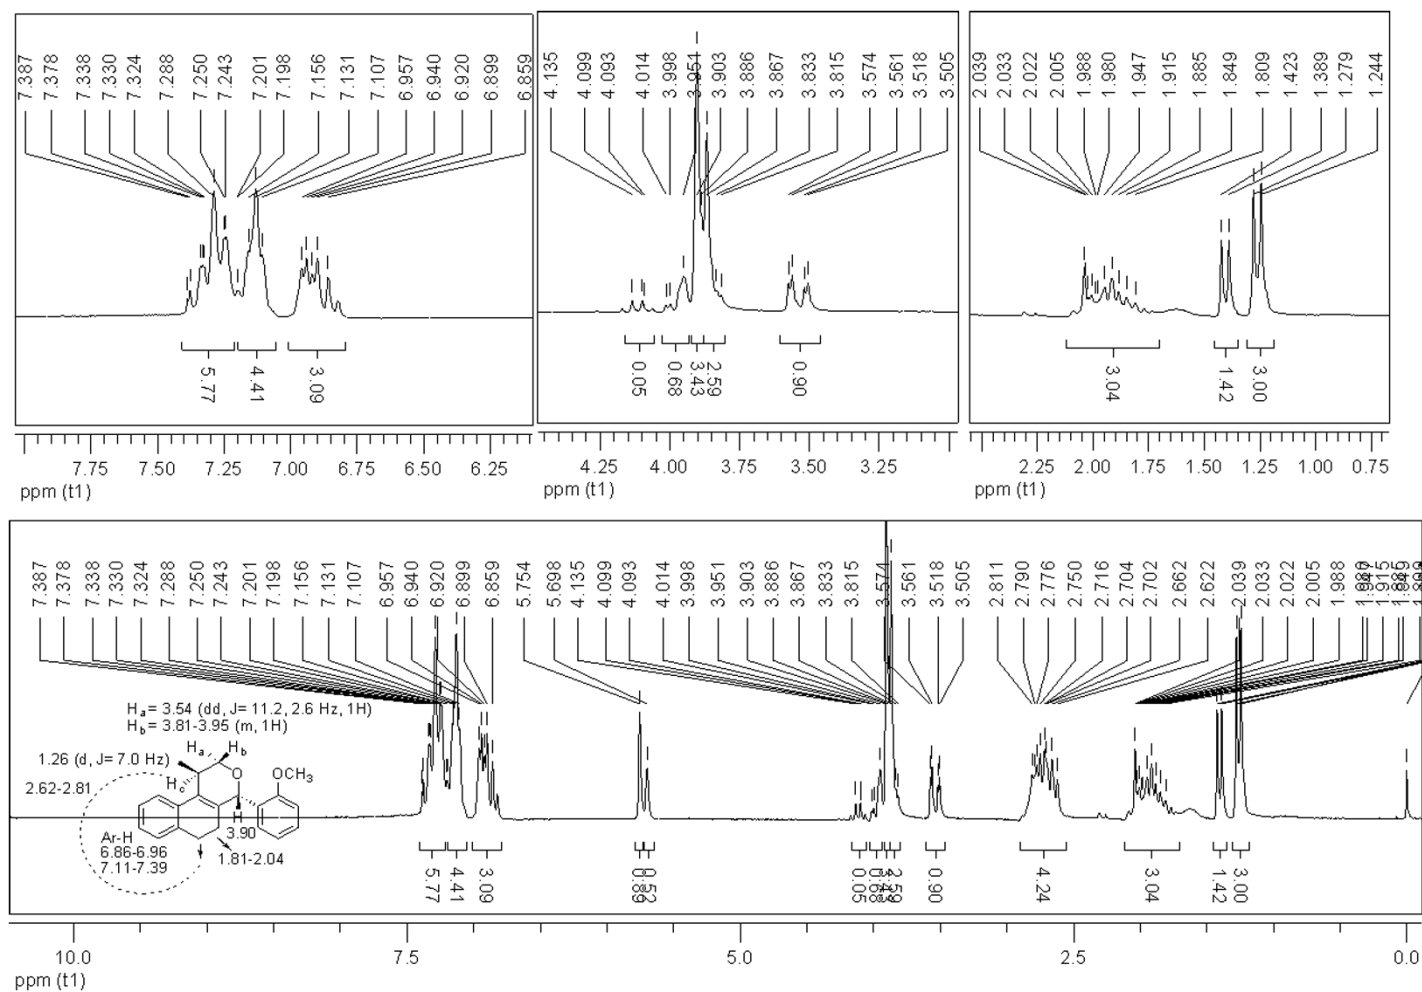

$^{13}\text{C}$ -NMR of compound *trans*-7c (75 MHz,  $\text{CDCl}_3$ )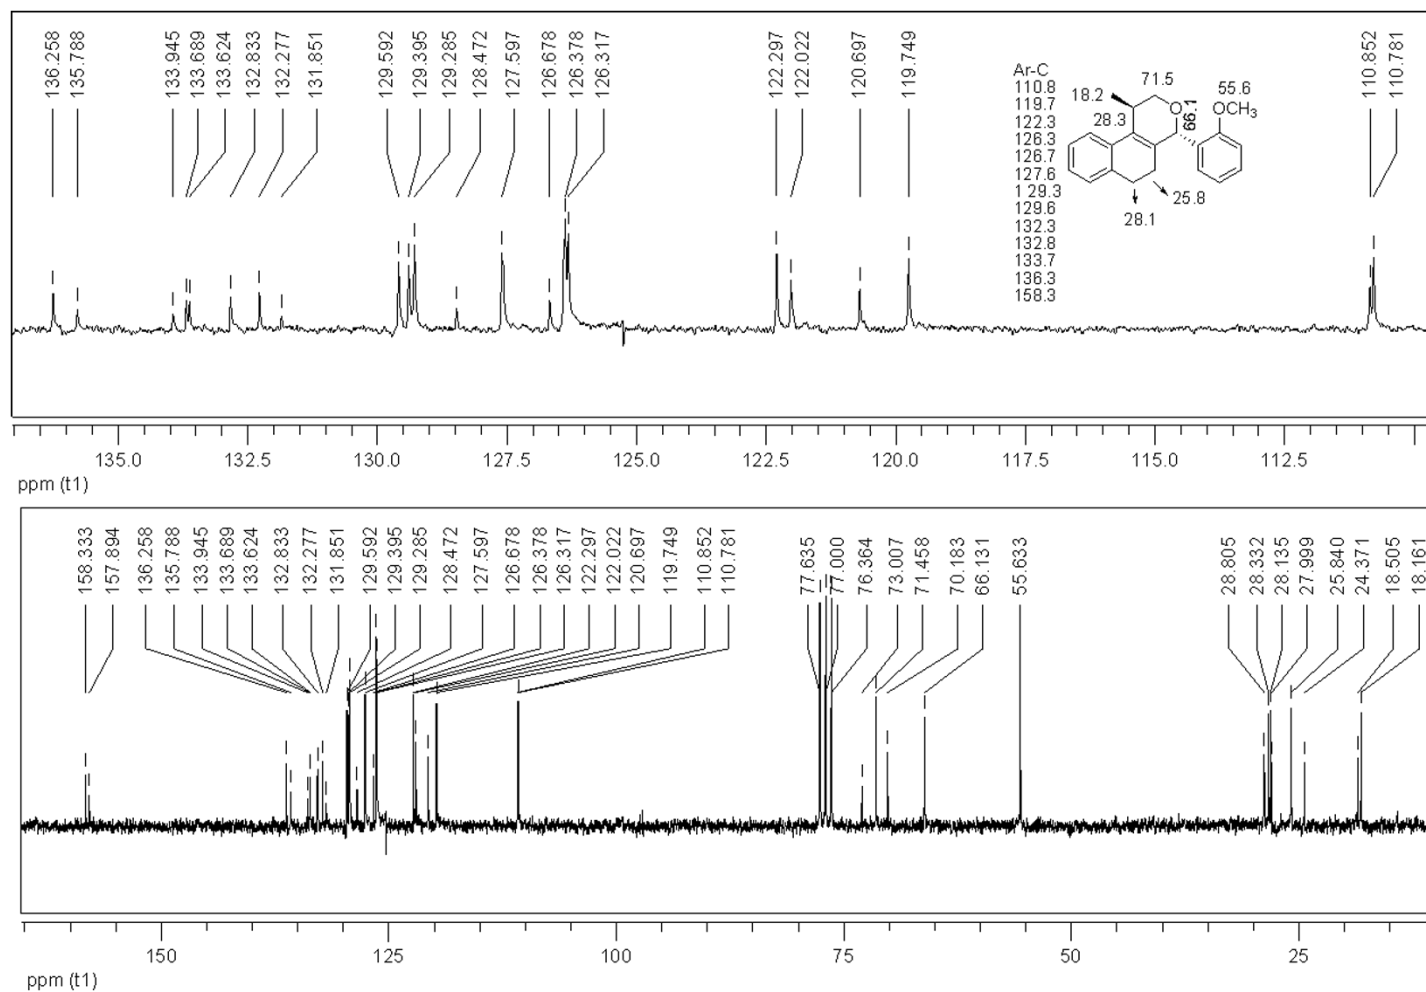

$^1\text{H}$ -NMR of compound *trans*-7d (200 MHz,  $\text{CDCl}_3$ )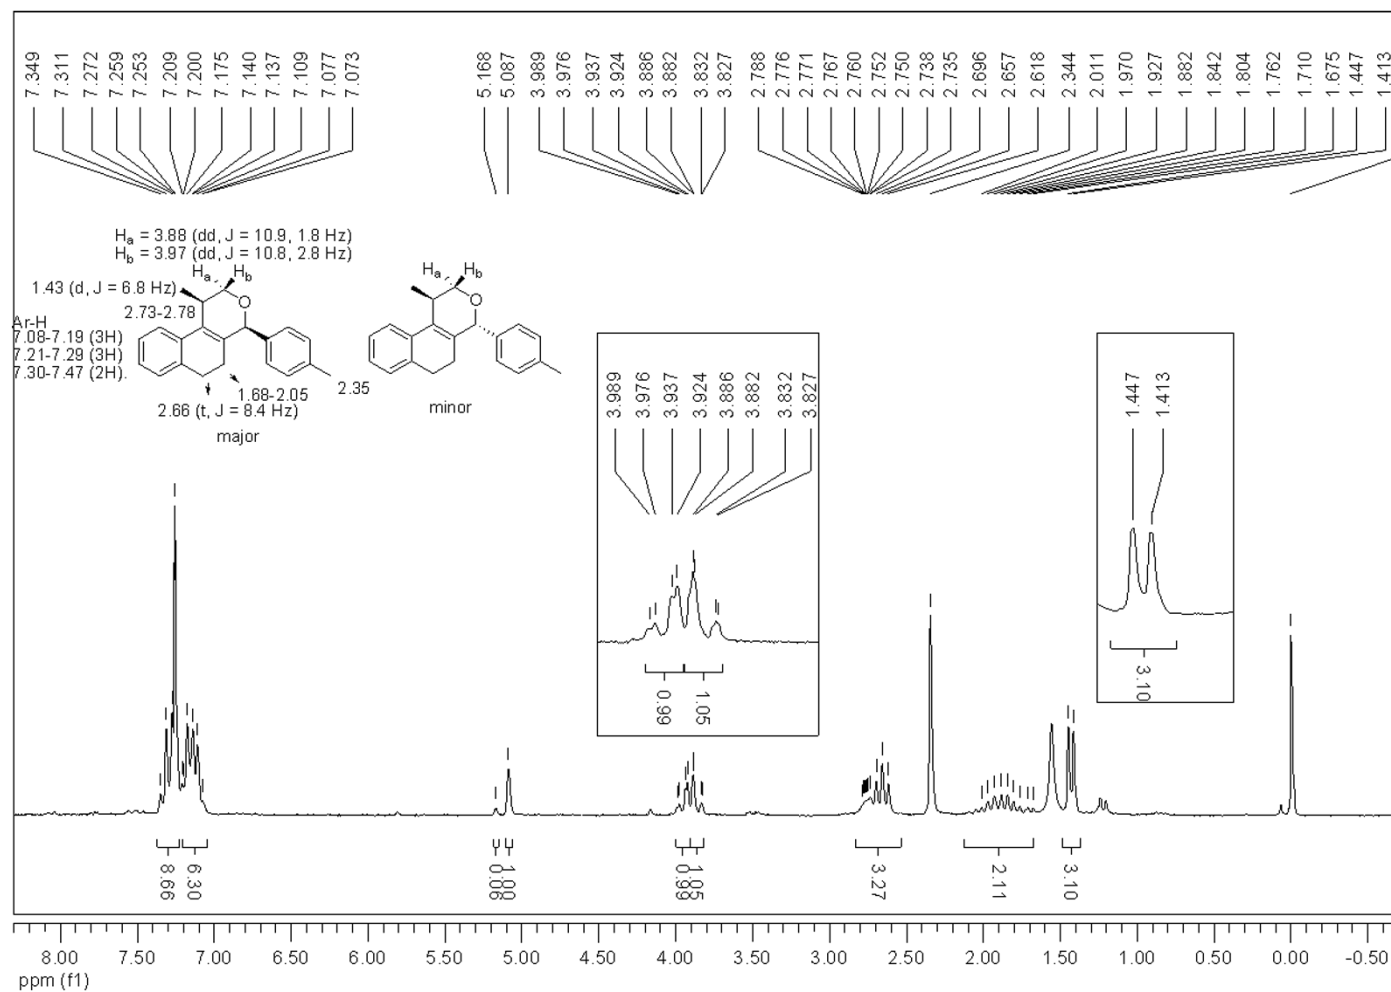

$^{13}\text{C}$ -NMR of compound *cis*-7d (50 MHz,  $\text{CDCl}_3$ )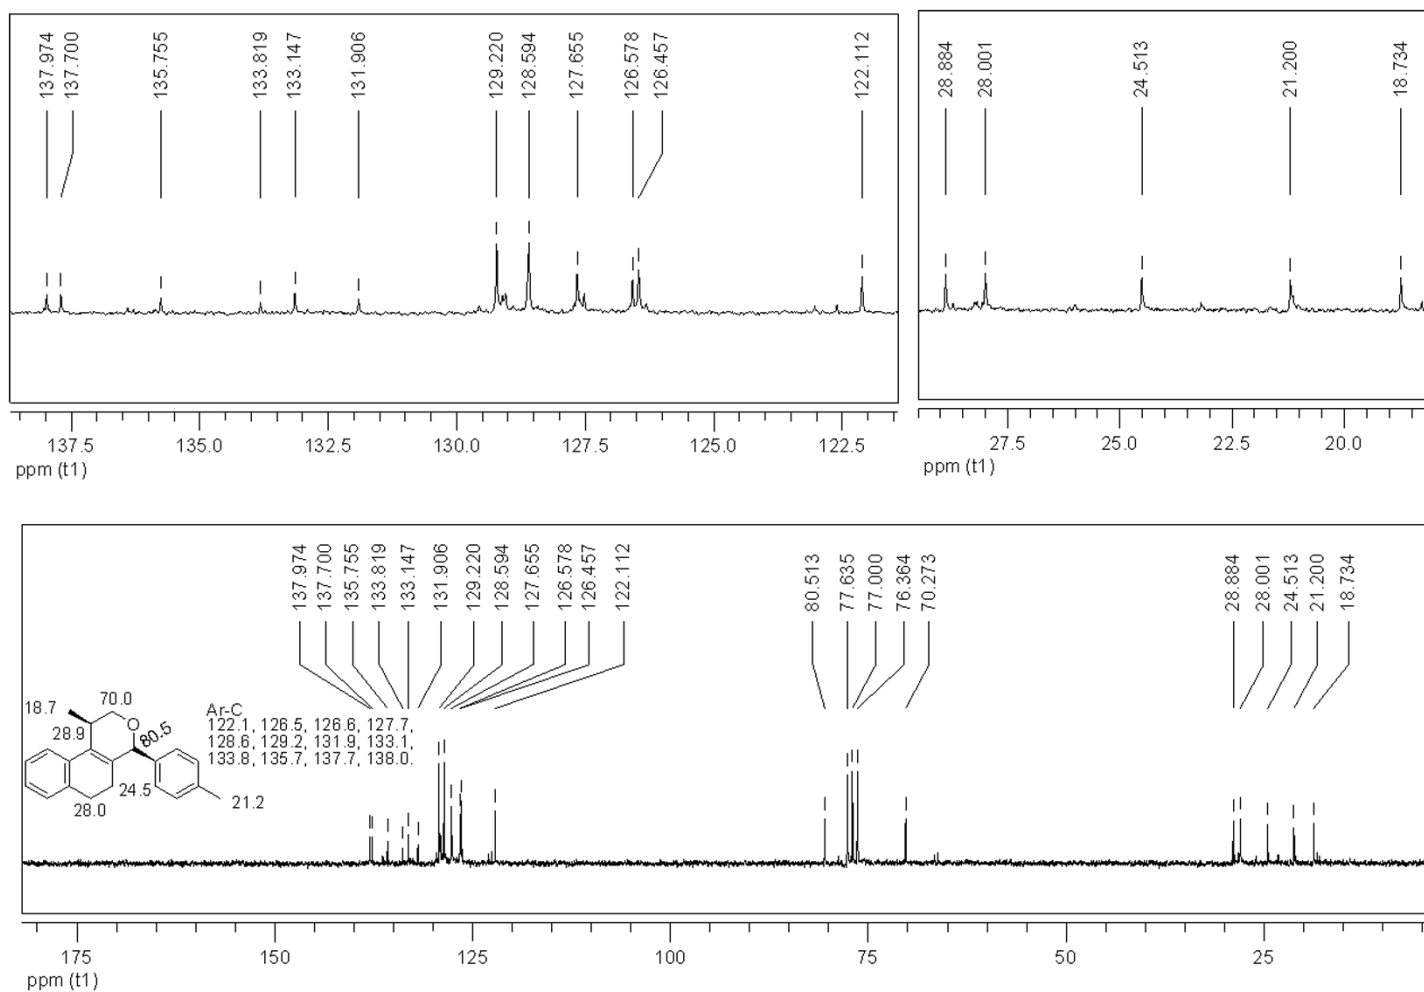

<sup>1</sup>H-NMR of compounds **12d** and *trans*-**7d** (200 MHz, CDCl<sub>3</sub>)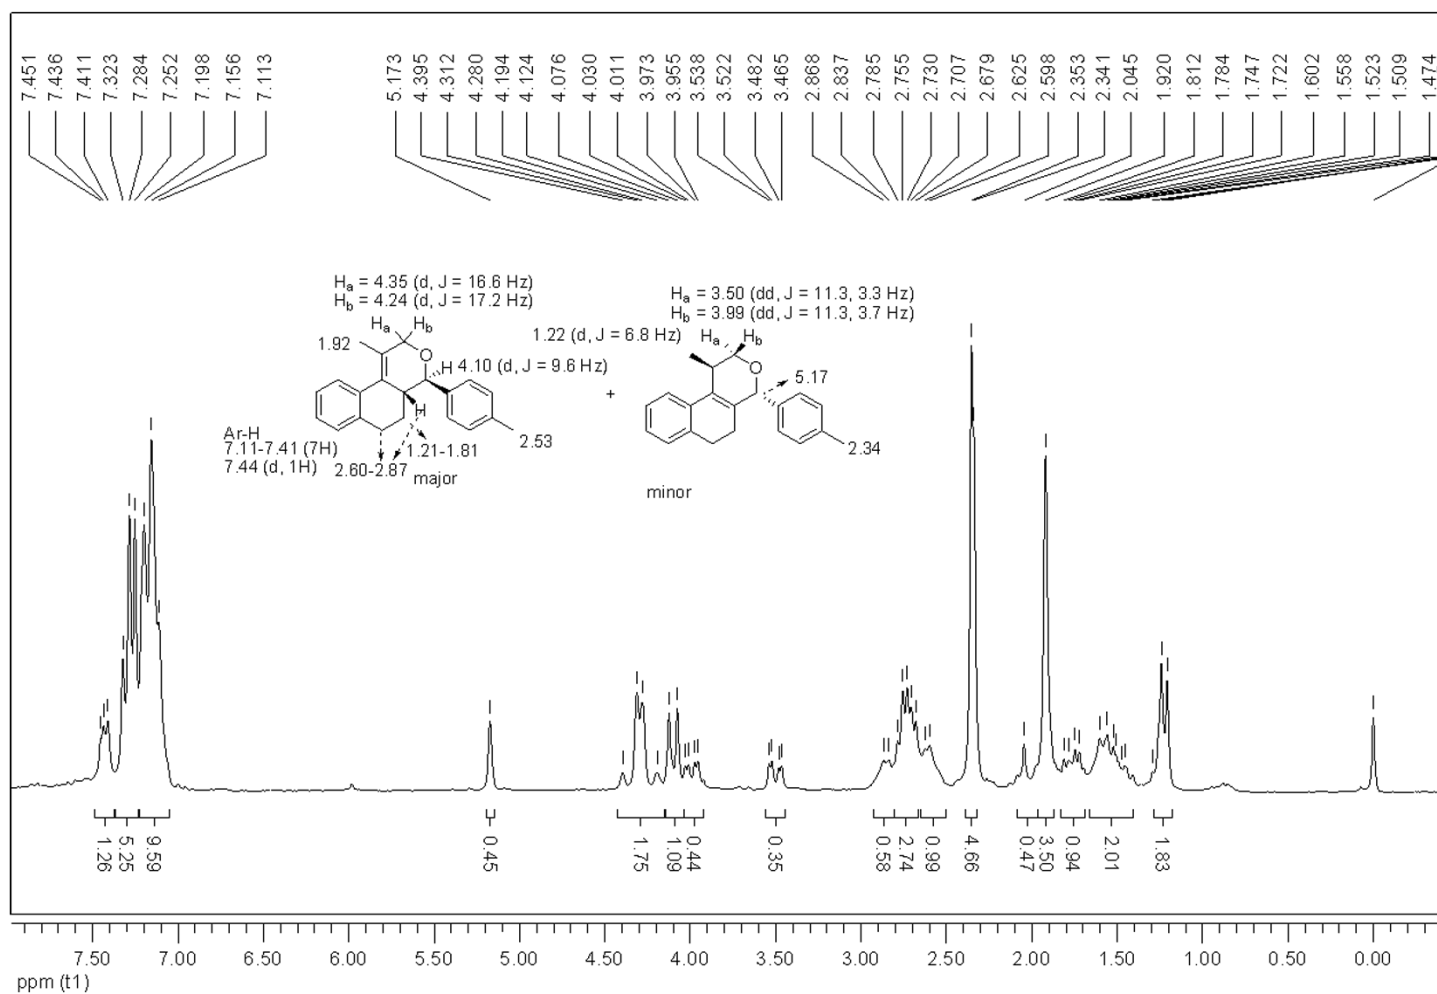

<sup>1</sup>H-NMR of compounds **12d** and *trans*-**7d** (200 MHz, CDCl<sub>3</sub>, selected expansions)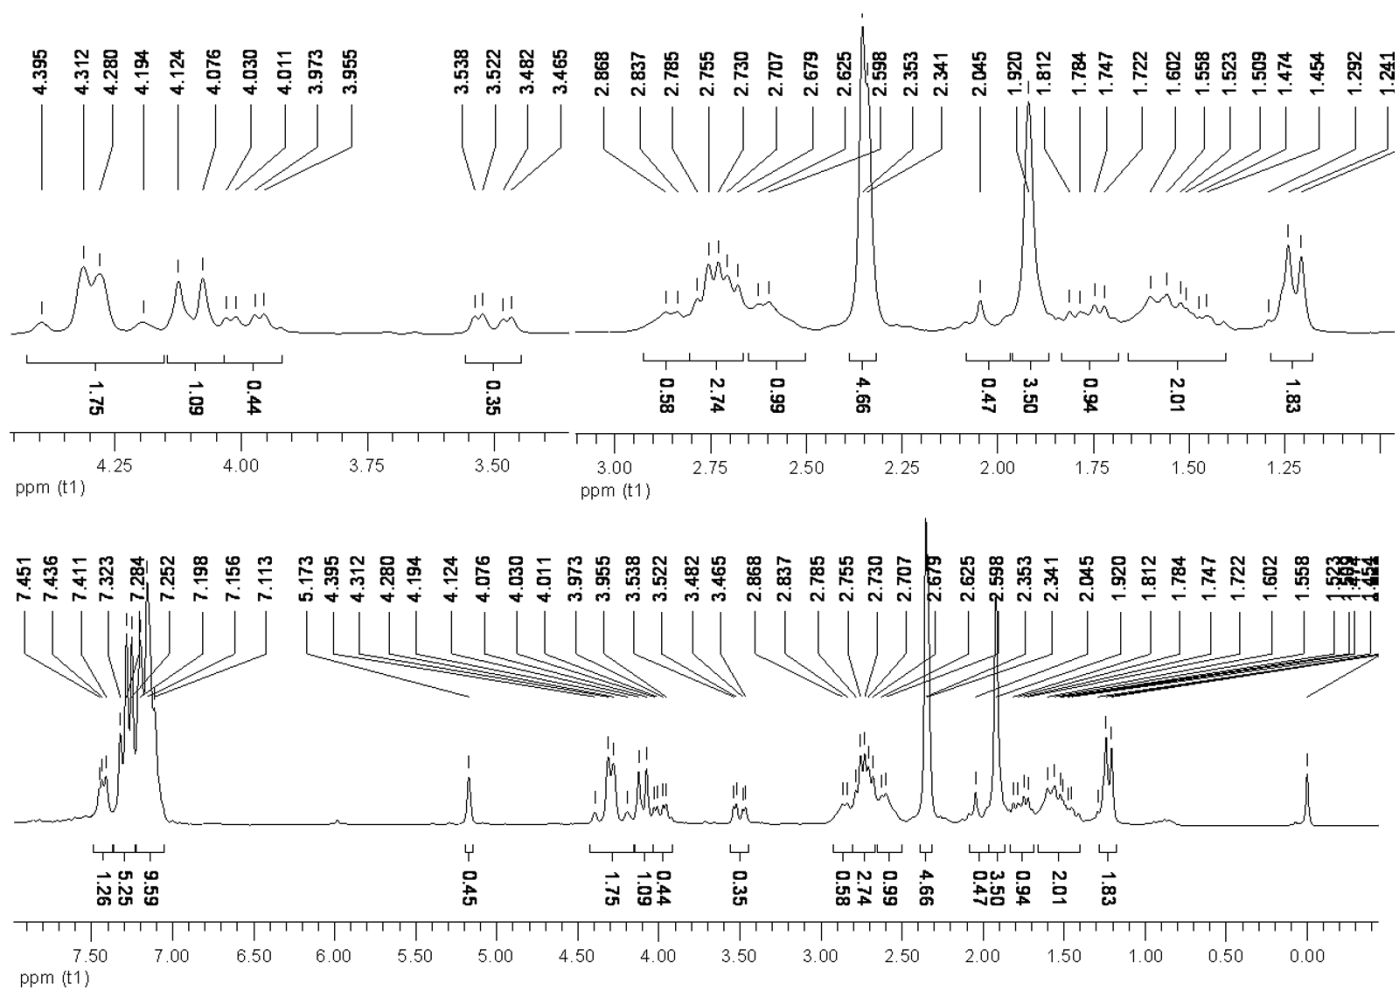

$^{13}\text{C}$ -NMR of compounds **12d** and *trans*-**7d** (75 MHz,  $\text{CDCl}_3$ )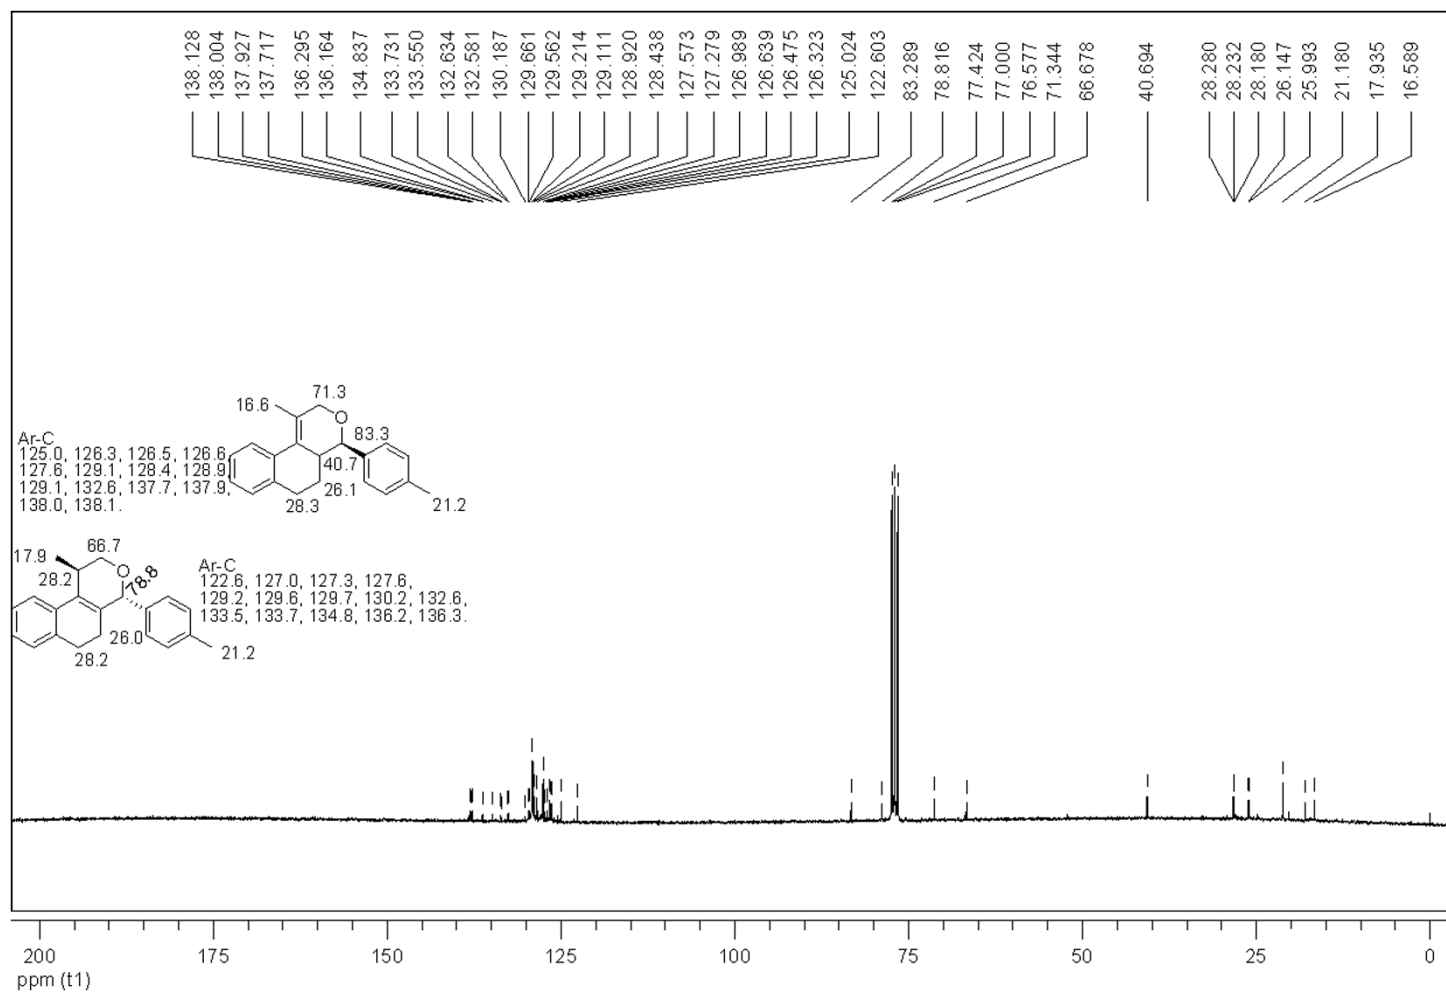

$^{13}\text{C}$ -NMR of compounds **12d** and *trans*-**7d** (75 MHz,  $\text{CDCl}_3$ , selected expansions)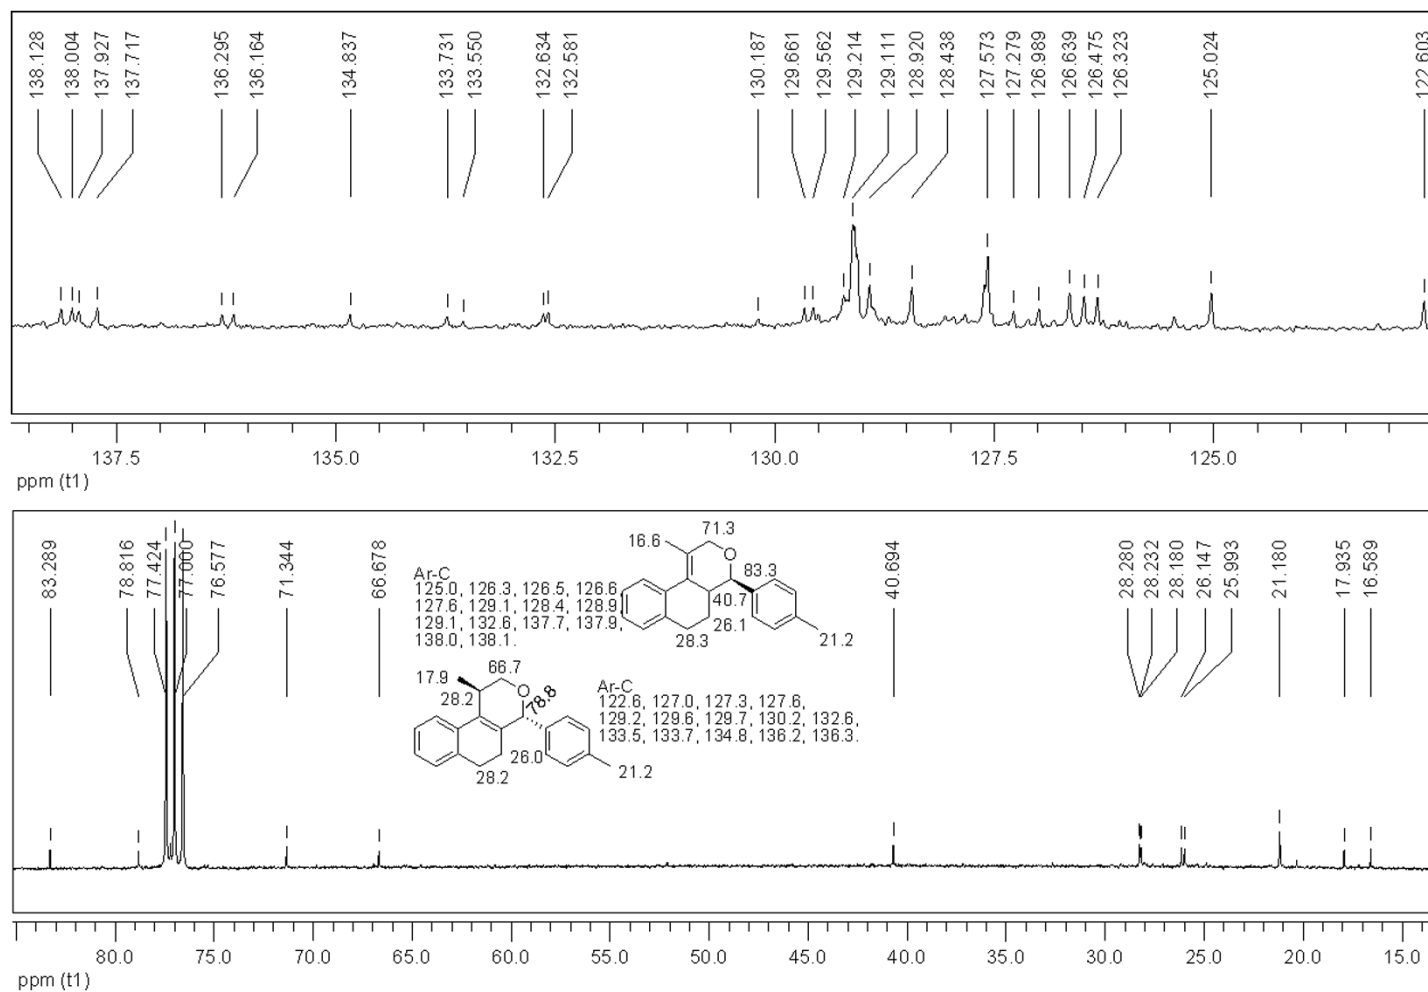

$^1\text{H}$ -NMR of compounds *cis*-7e and *trans*-7e (200 MHz,  $\text{CDCl}_3$ )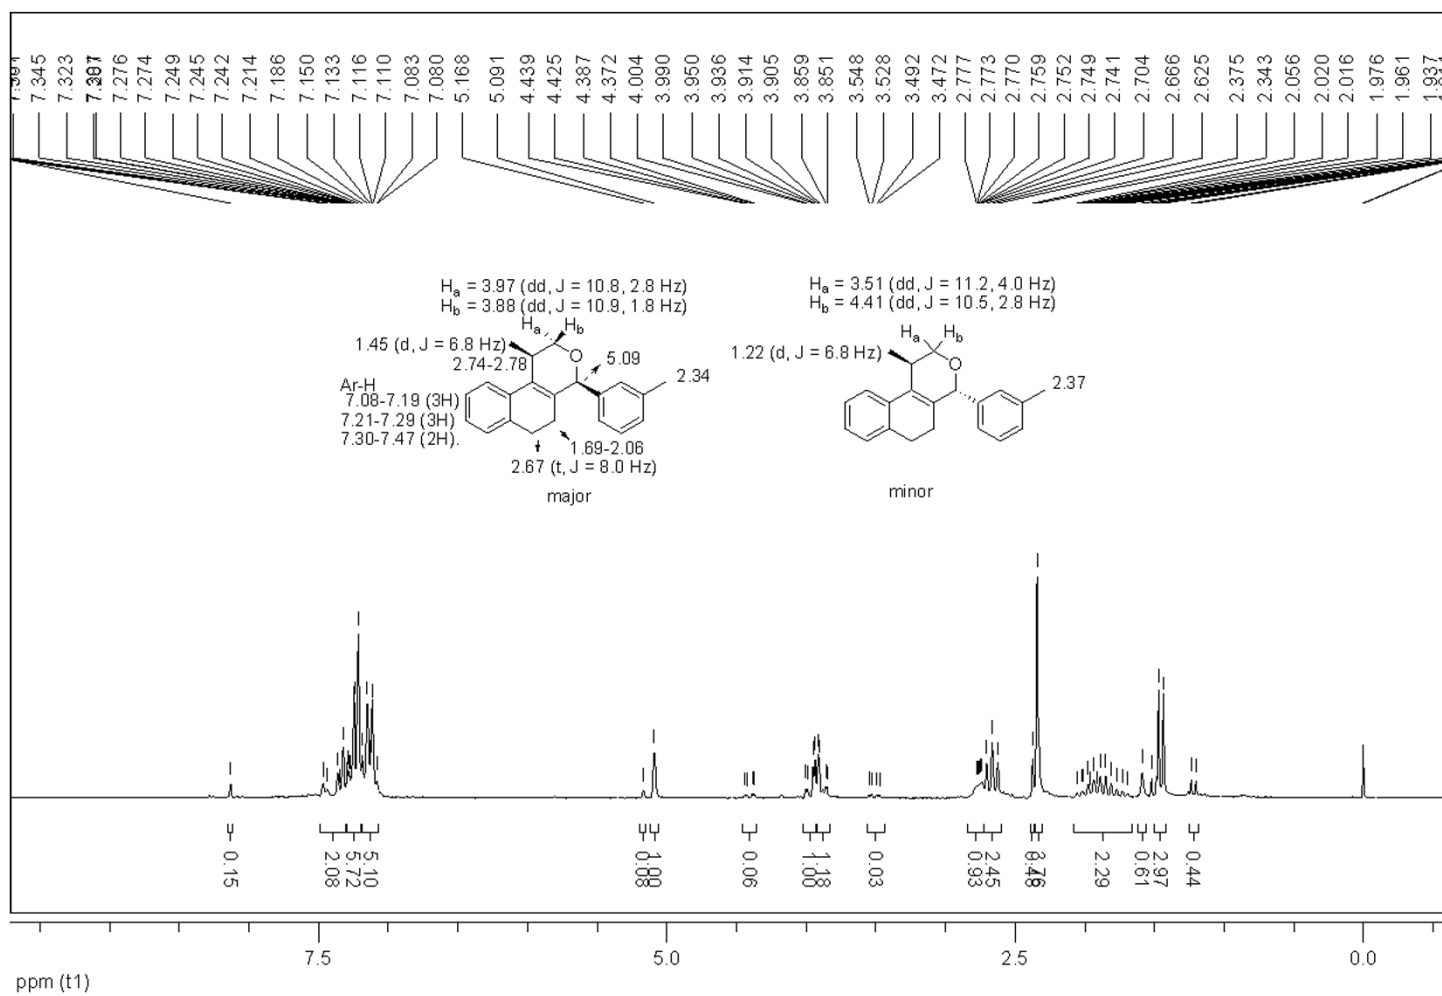

$^1\text{H}$ -NMR of compounds *cis*-7e and *trans*-7e (200 MHz,  $\text{CDCl}_3$ )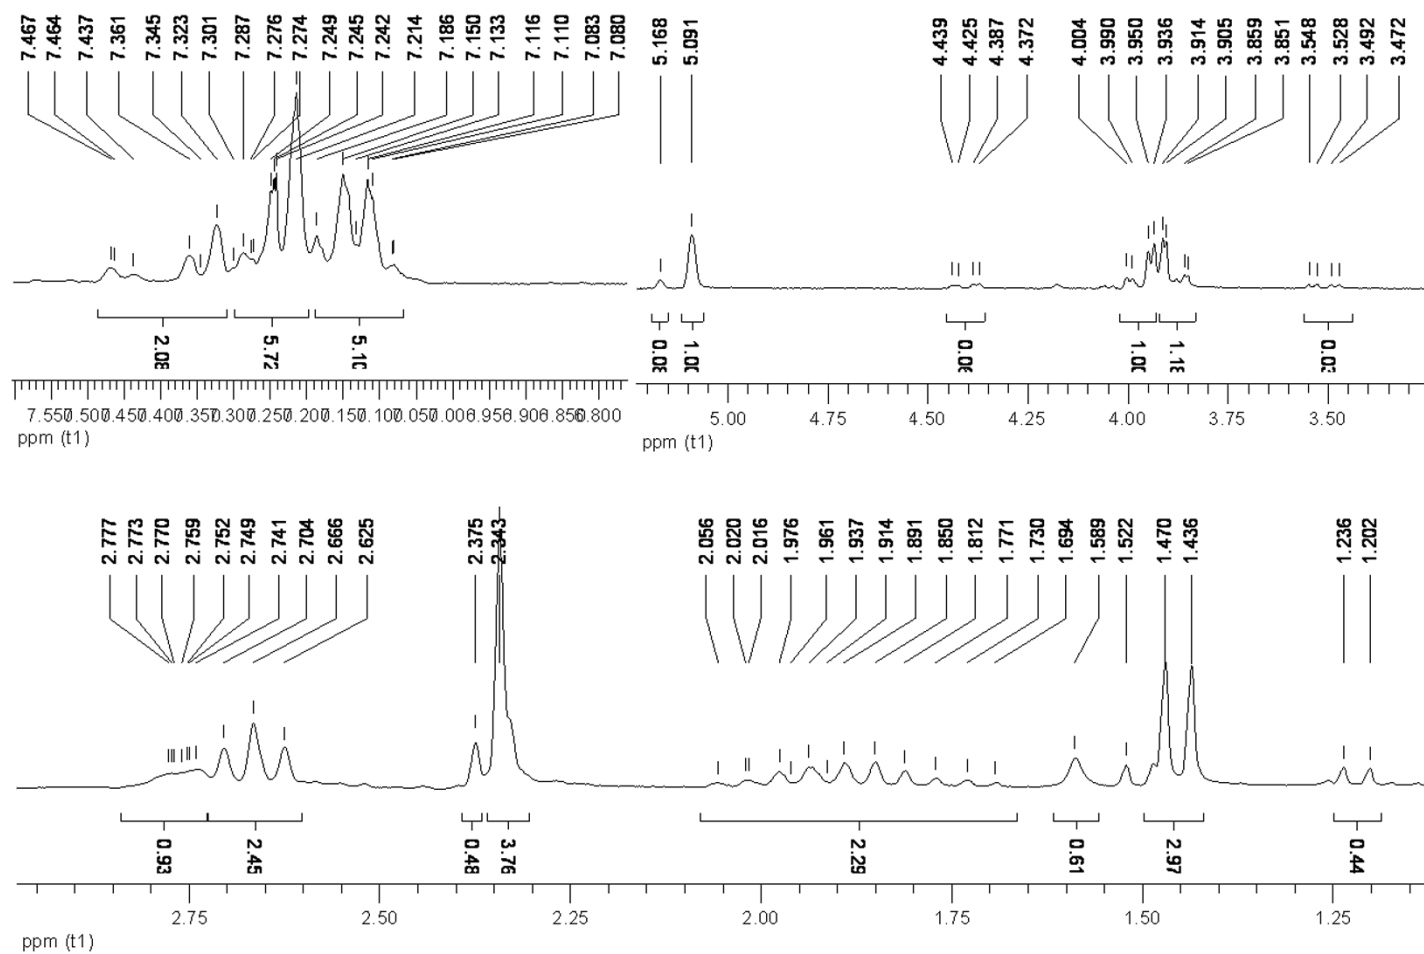

$^{13}\text{C}$ -NMR of compound *cis*-7e (50 MHz,  $\text{CDCl}_3$ )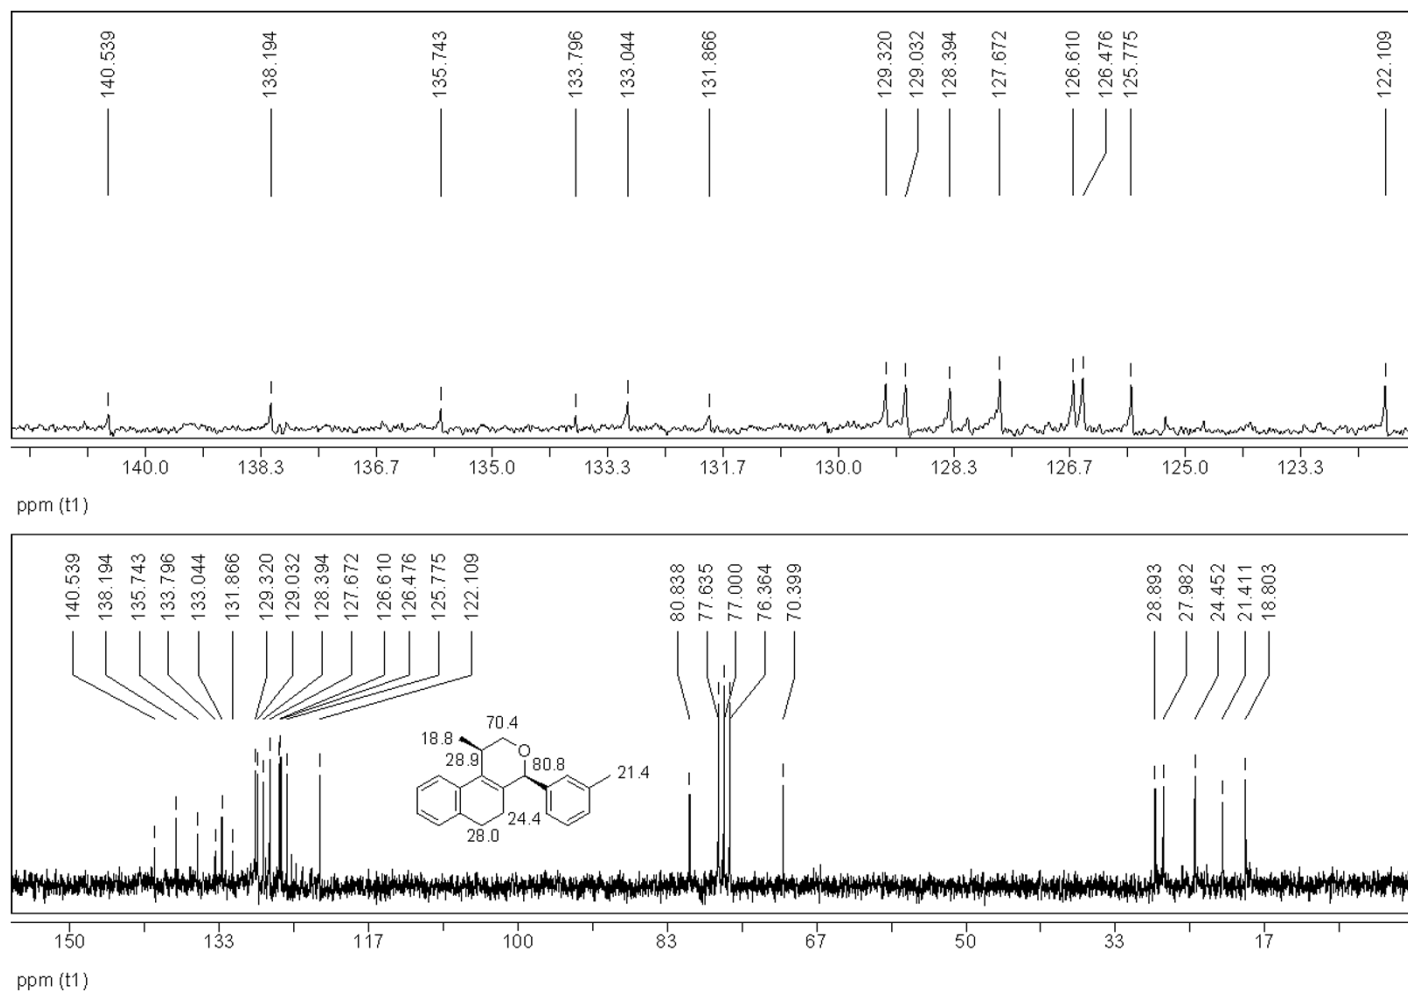

<sup>1</sup>H-NMR of compound **12e** (500 MHz, CDCl<sub>3</sub>)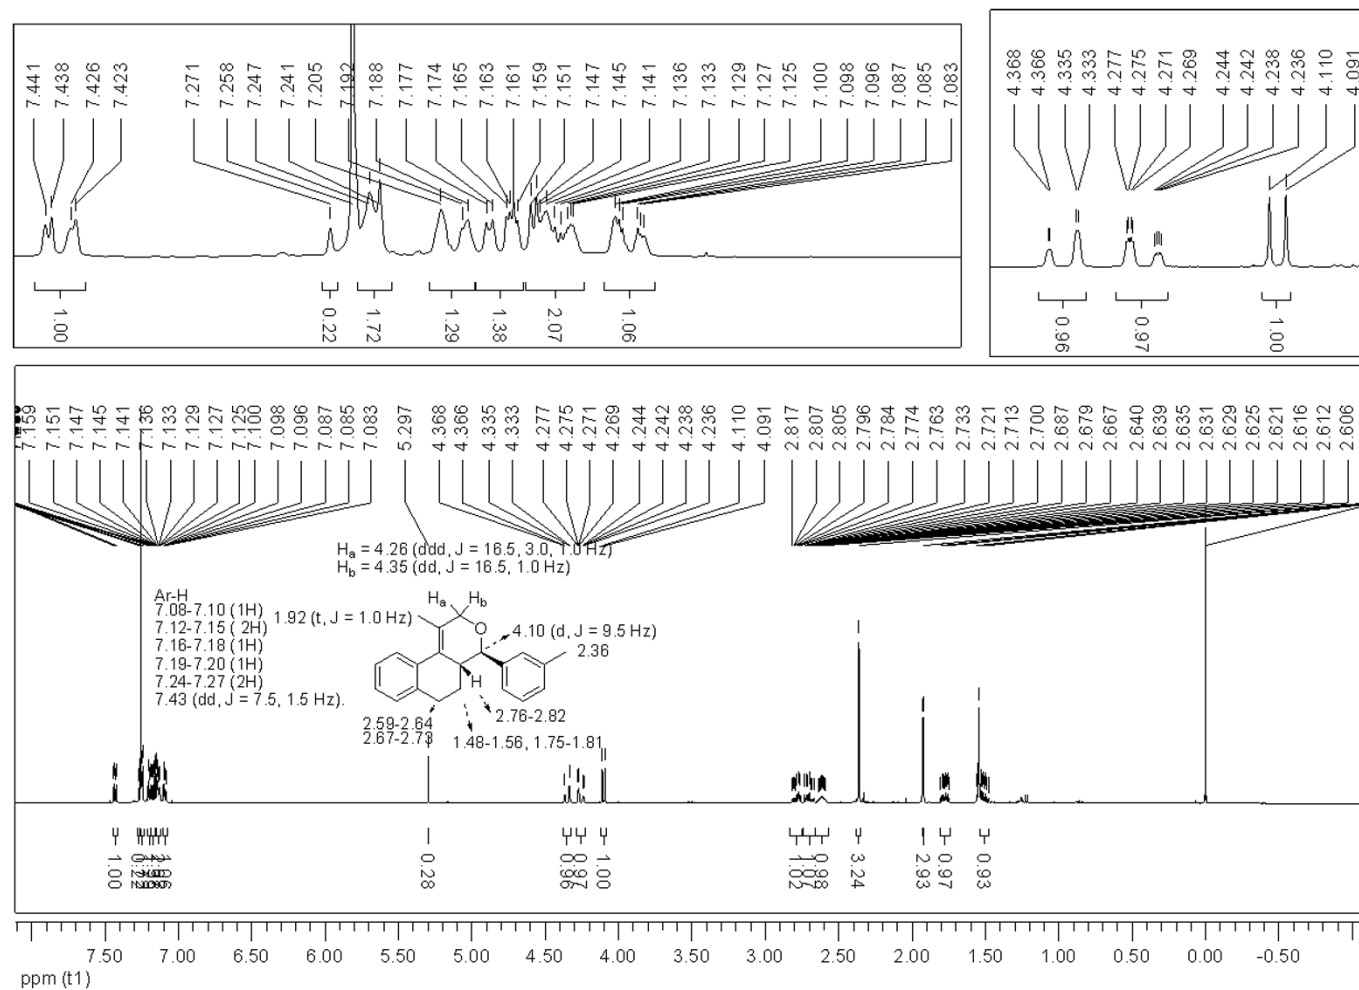

<sup>1</sup>H-NMR of compound **12e** (300 MHz, CDCl<sub>3</sub>)

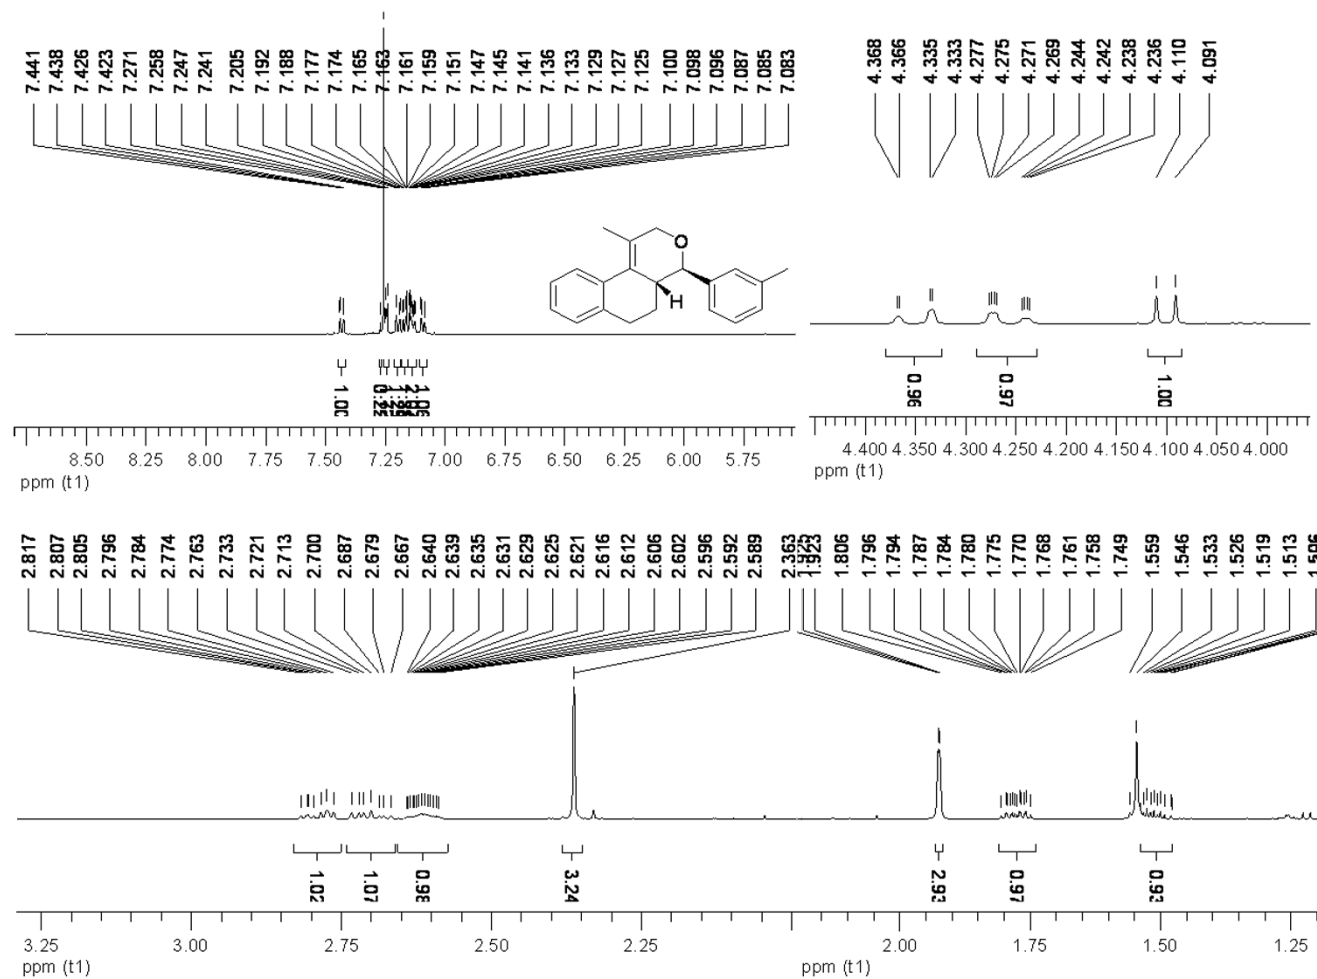

$^{13}\text{C}$ -NMR of compound **12e** (75 MHz,  $\text{CDCl}_3$ )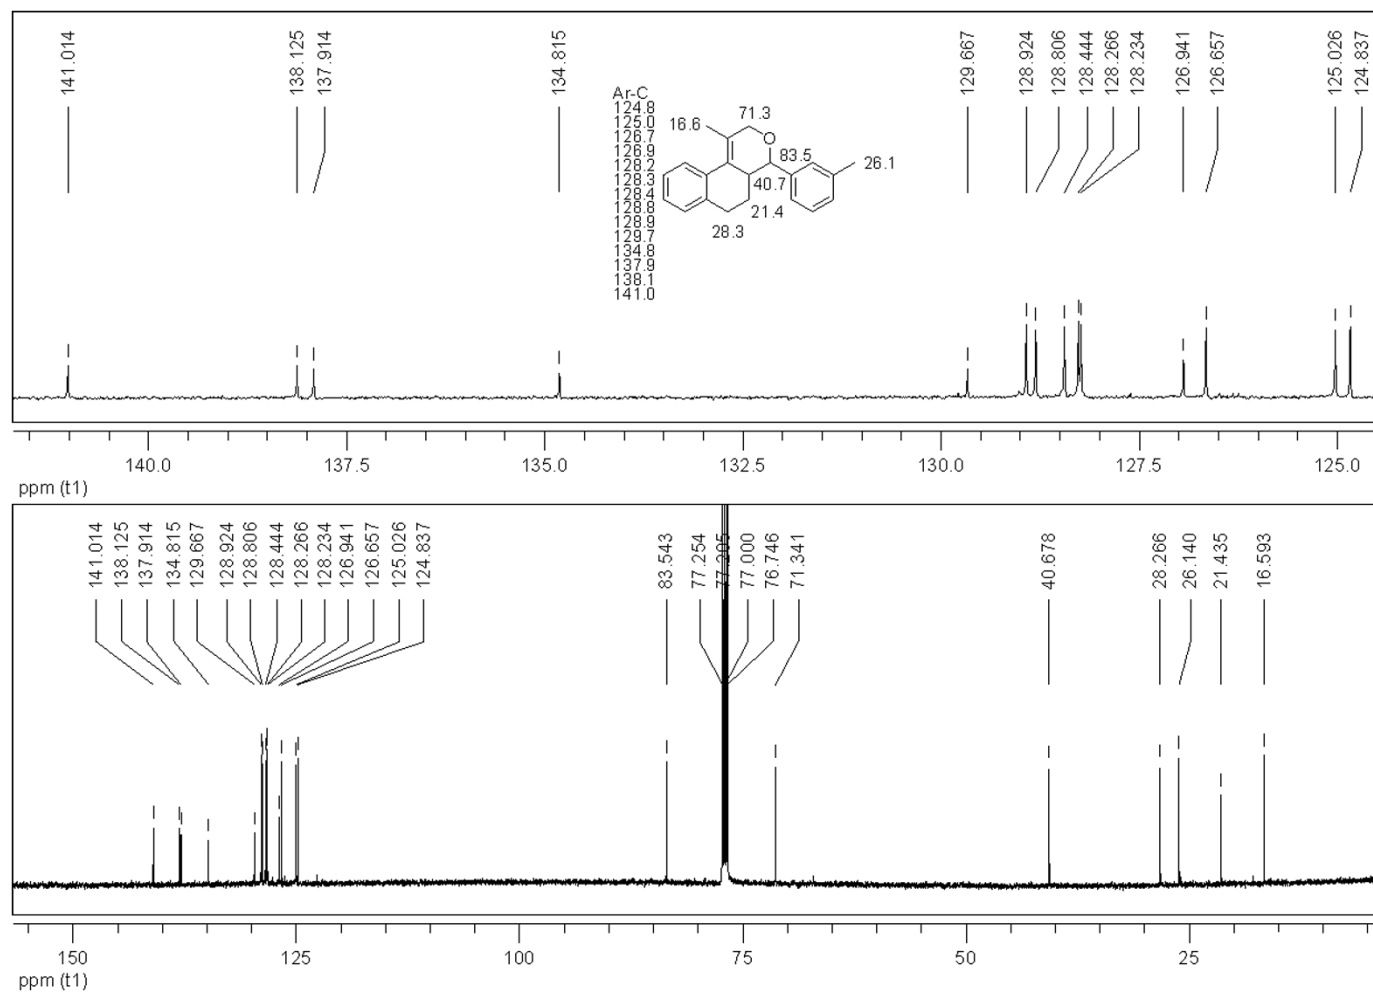

<sup>1</sup>H-NMR of compound *cis-7f* (300 MHz, CDCl<sub>3</sub>)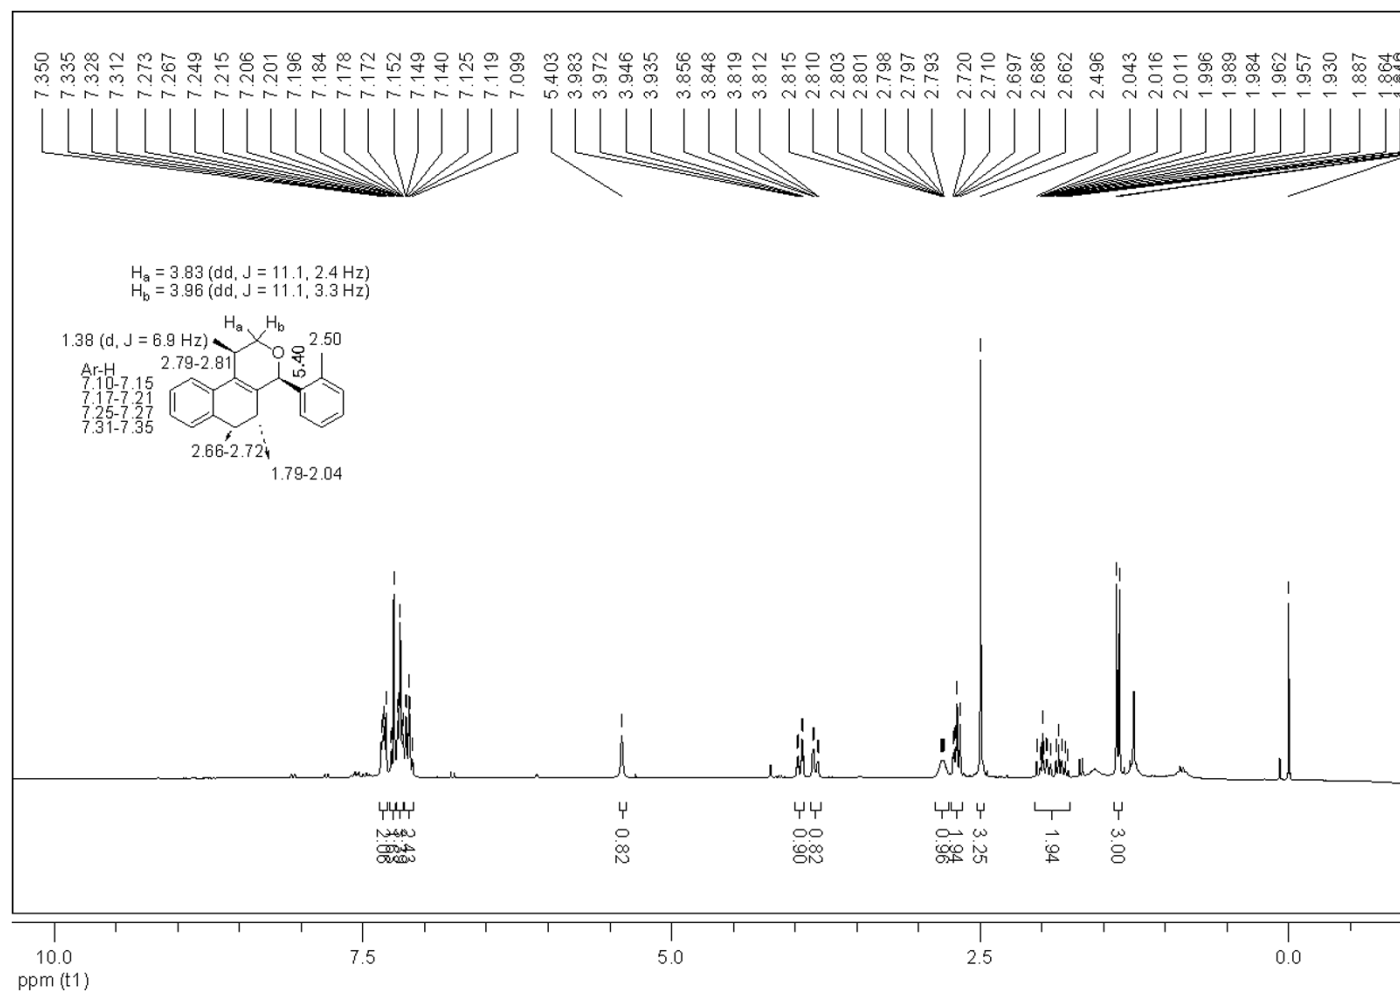

$^1\text{H}$ -NMR of compound *cis*-7f (300 MHz,  $\text{CDCl}_3$ )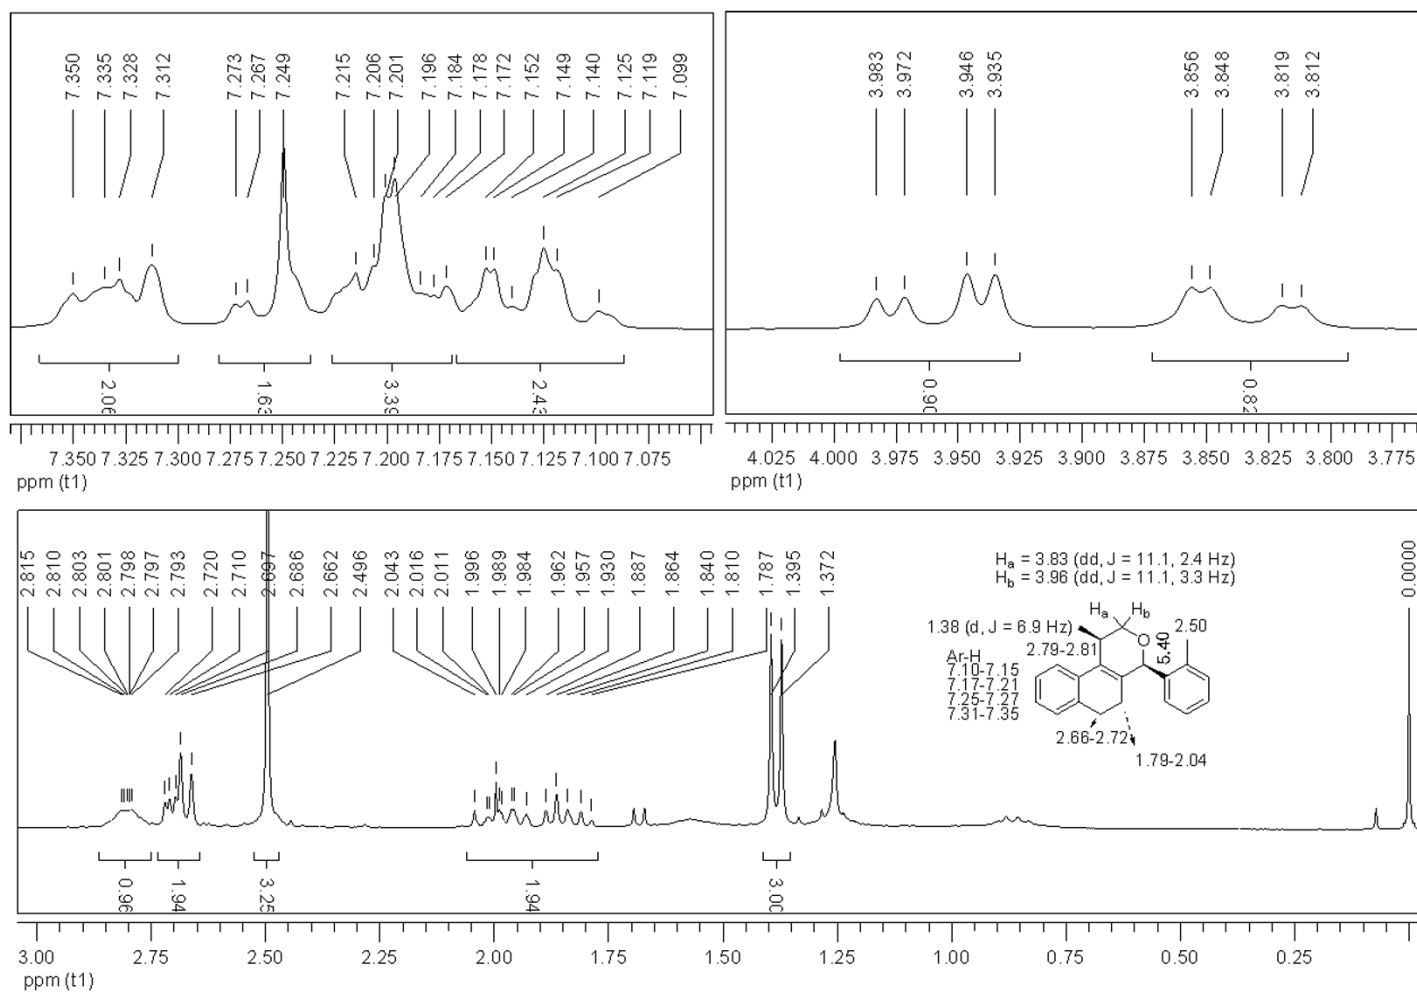

$^{13}\text{C}$ -NMR of compound *cis*-7f (75 MHz,  $\text{CDCl}_3$ )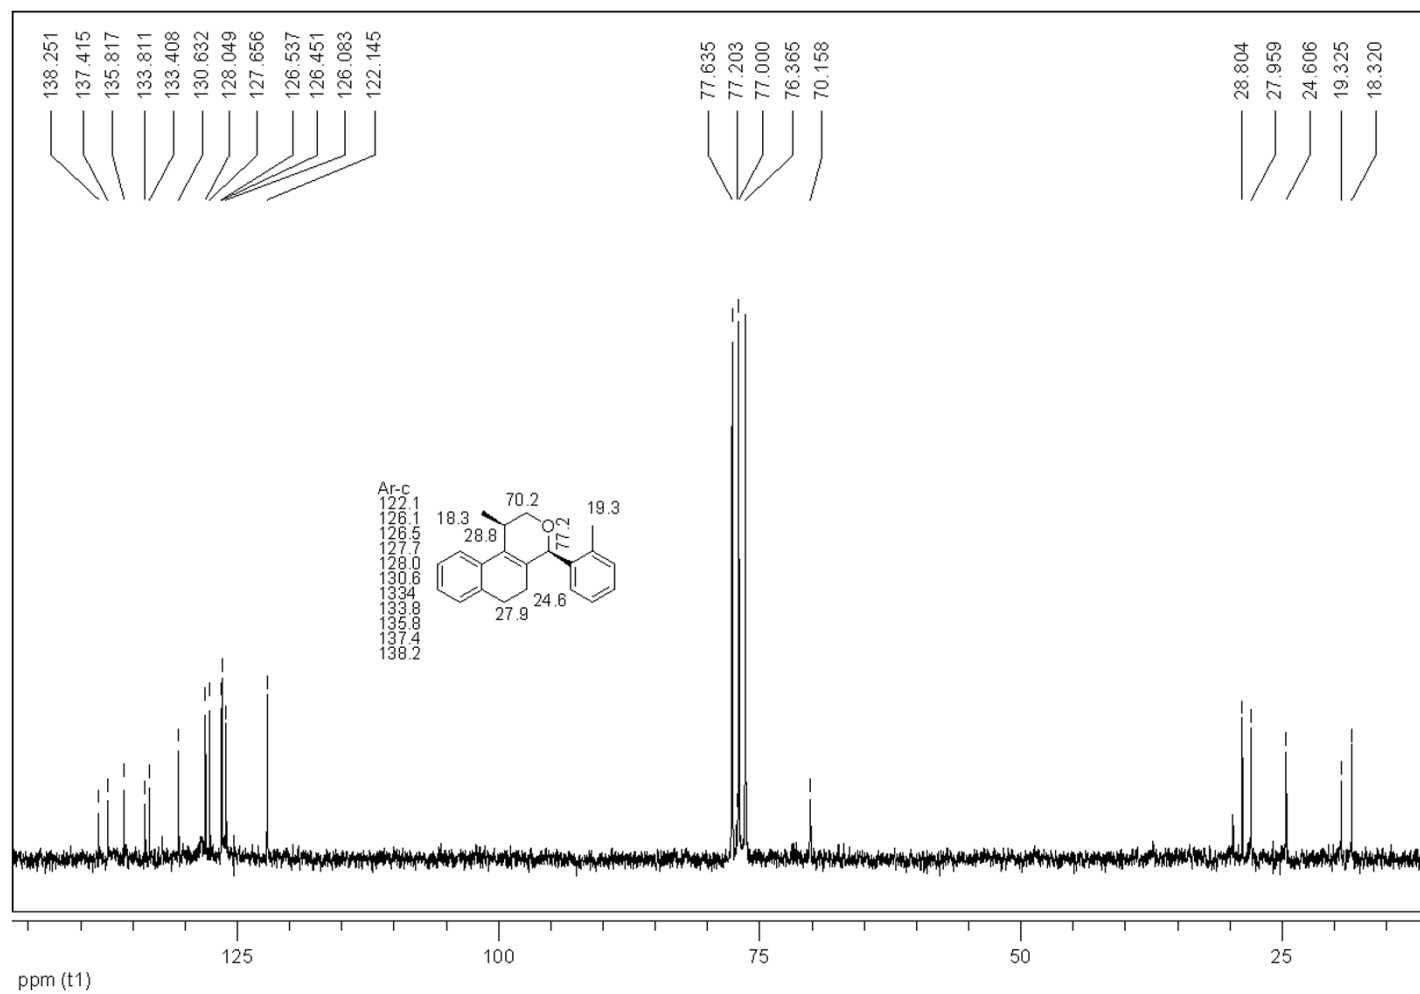

2D NOESY NMR of compound *cis-7f* (300 MHz, CDCl<sub>3</sub>)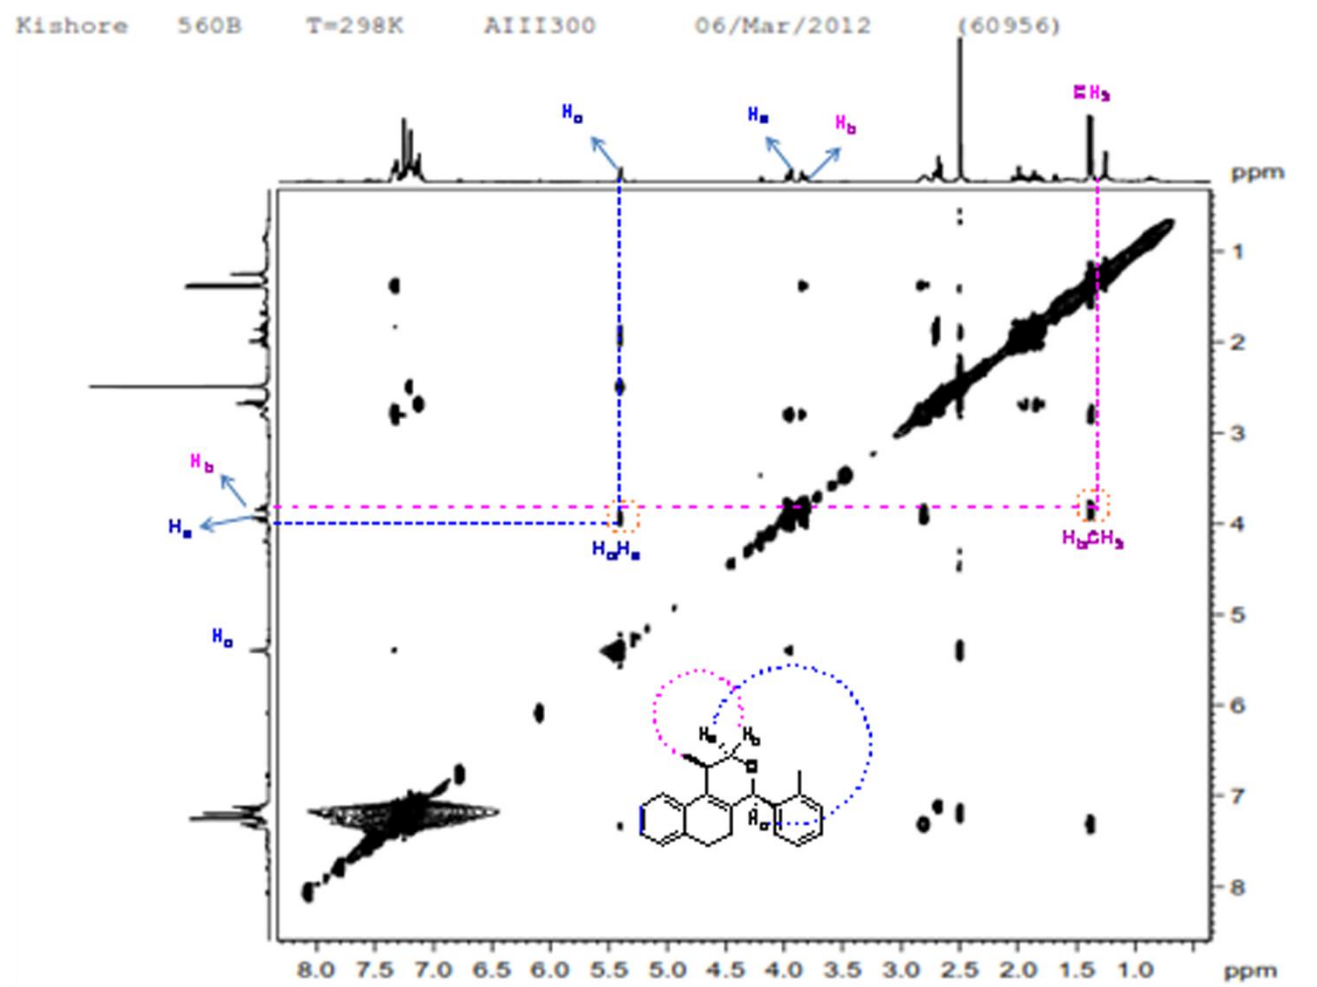

<sup>1</sup>H-NMR of compound *trans*-7f (500 MHz, CDCl<sub>3</sub>)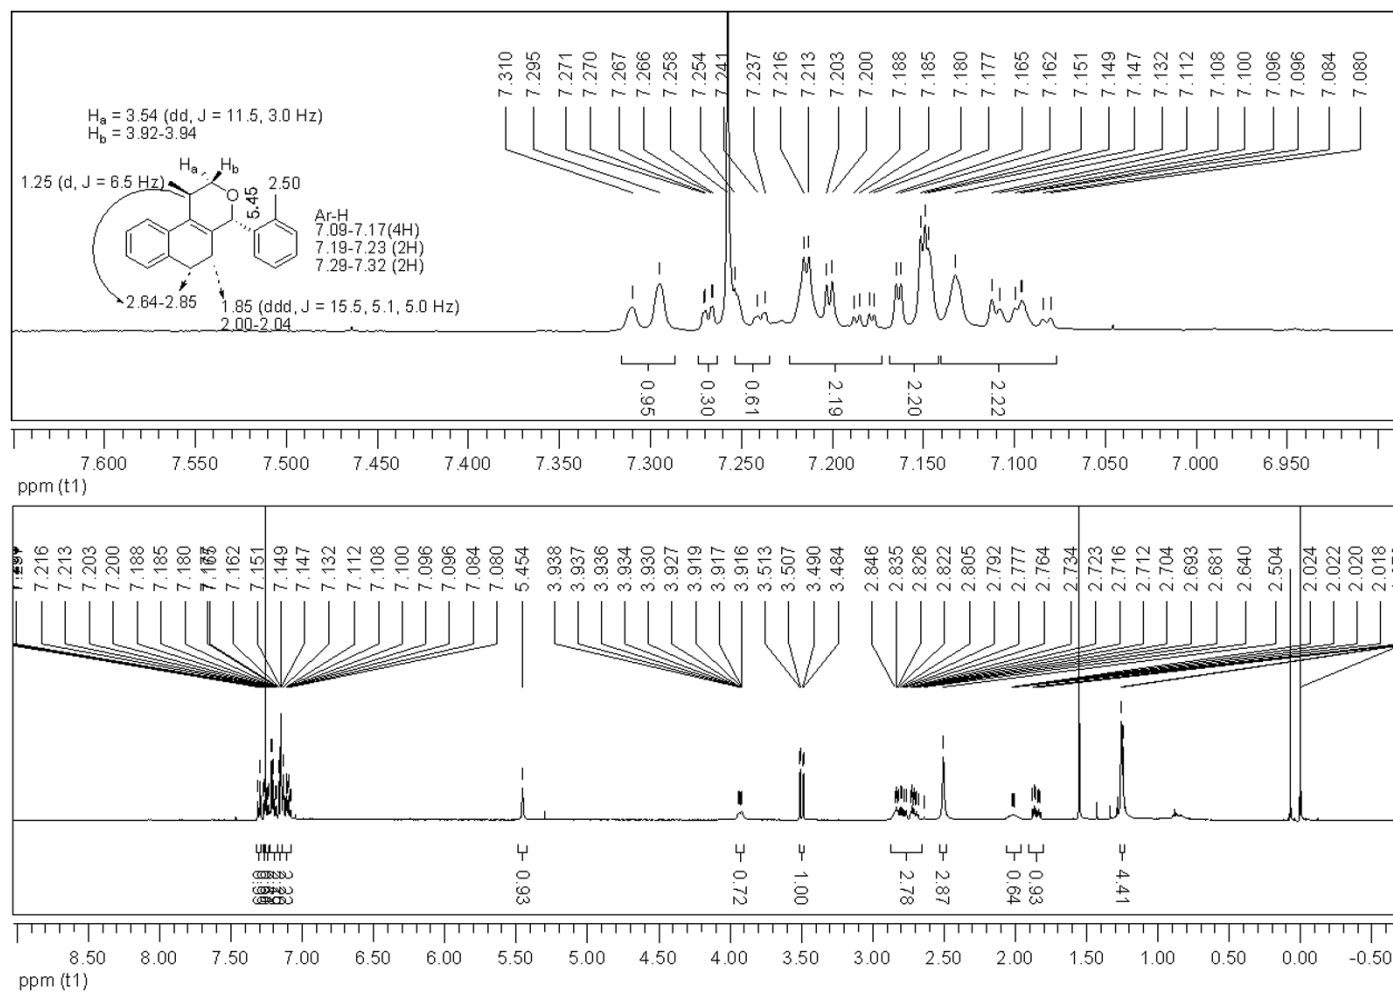

<sup>1</sup>H-NMR of compound *trans*-7f (500 MHz, CDCl<sub>3</sub>)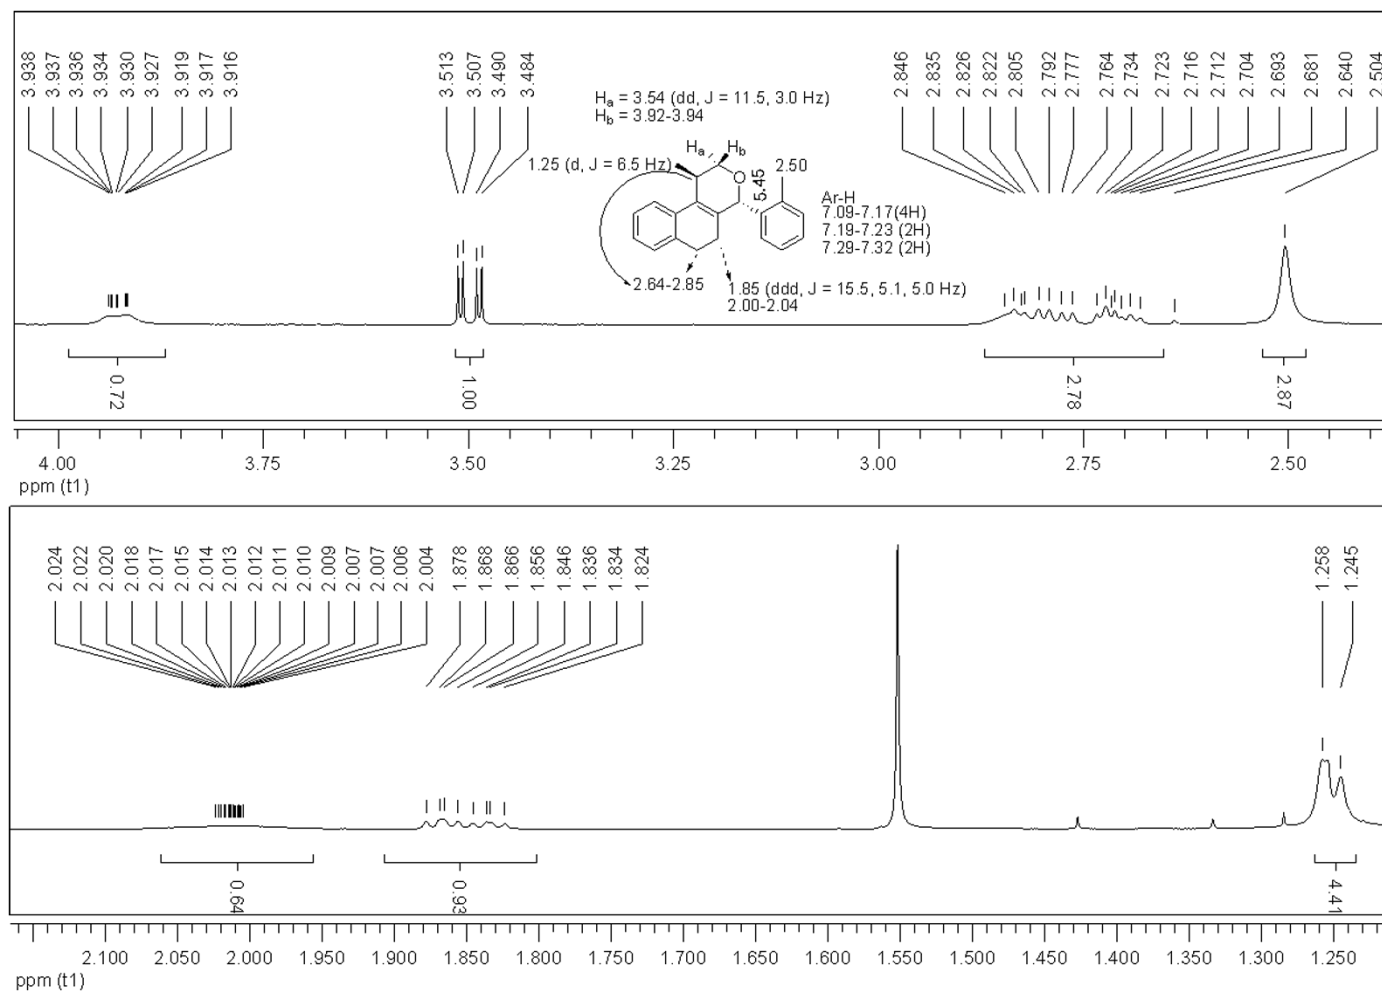

$^{13}\text{C}$ -NMR of compound *trans*-7f (75 MHz,  $\text{CDCl}_3$ )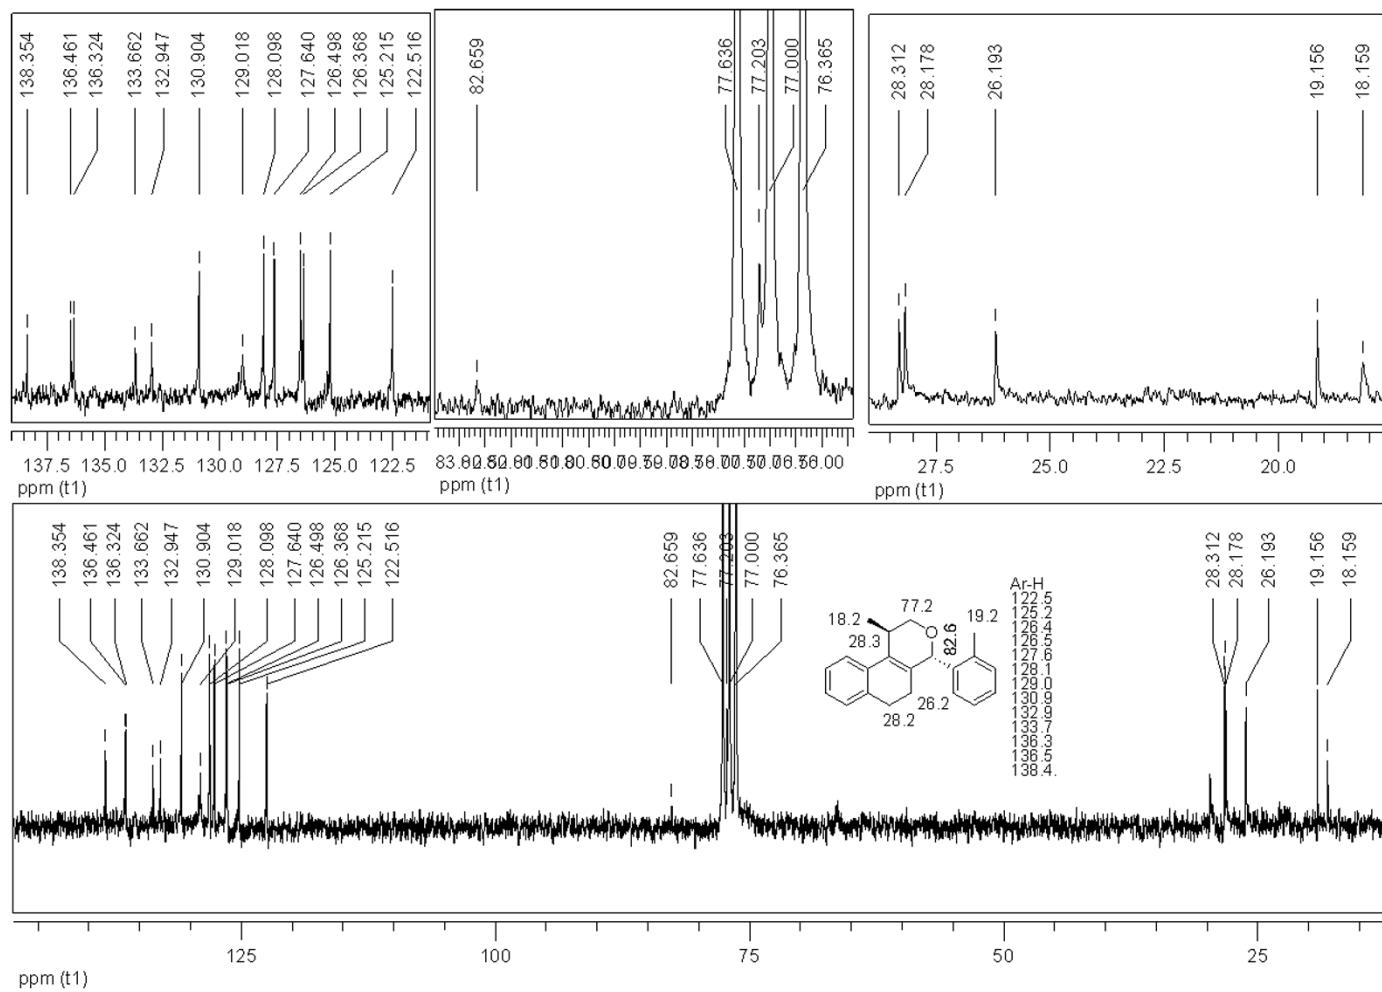

2D NOESY NMR of compound *trans*-7f (500 MHz, CDCl<sub>3</sub>)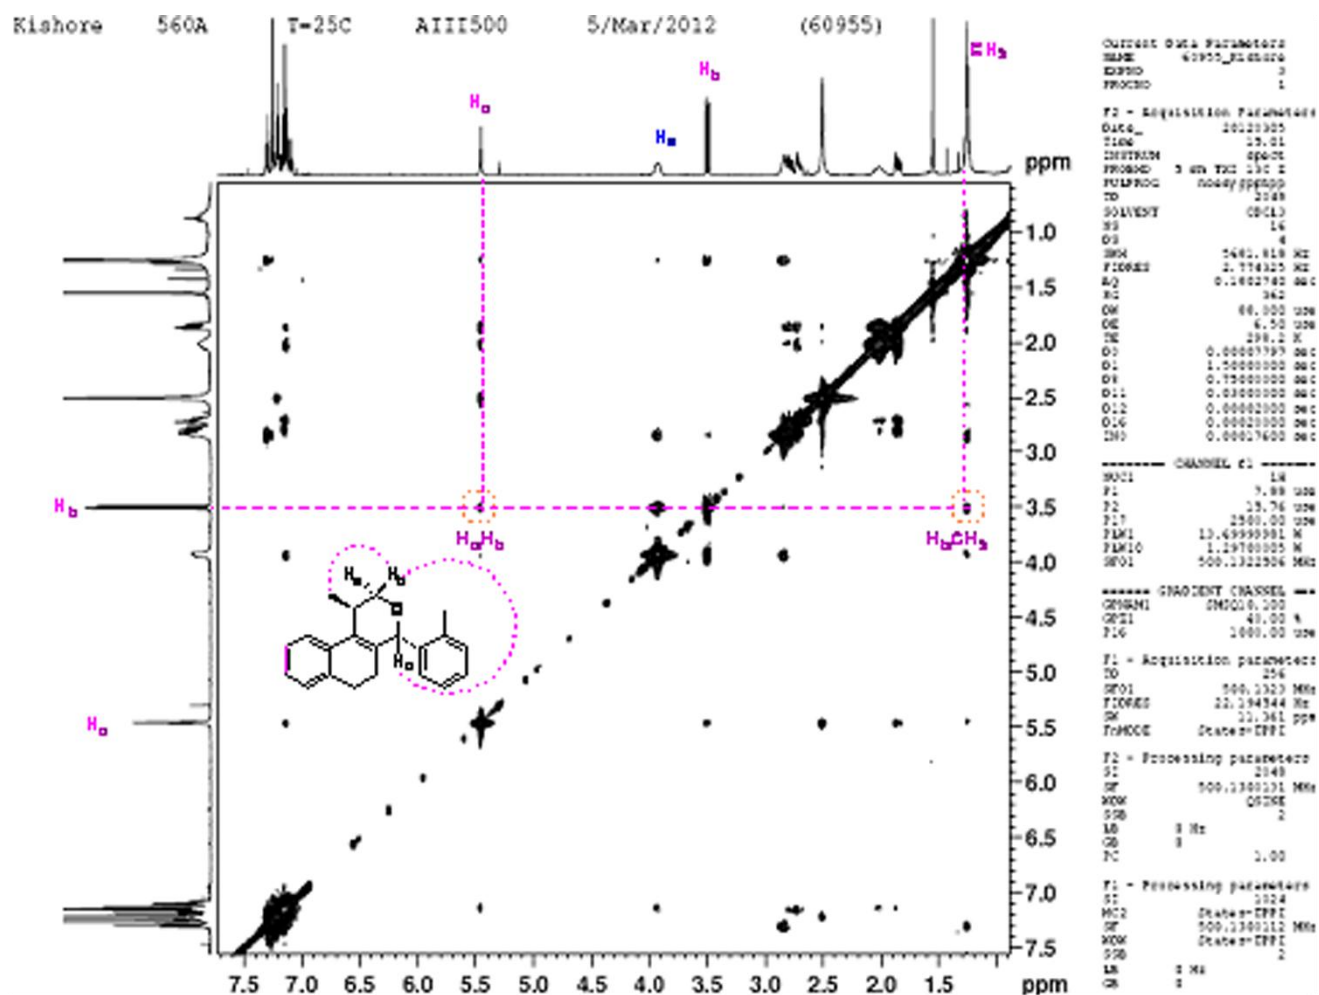

<sup>1</sup>H-NMR of compound **12g** (200 MHz, CDCl<sub>3</sub>)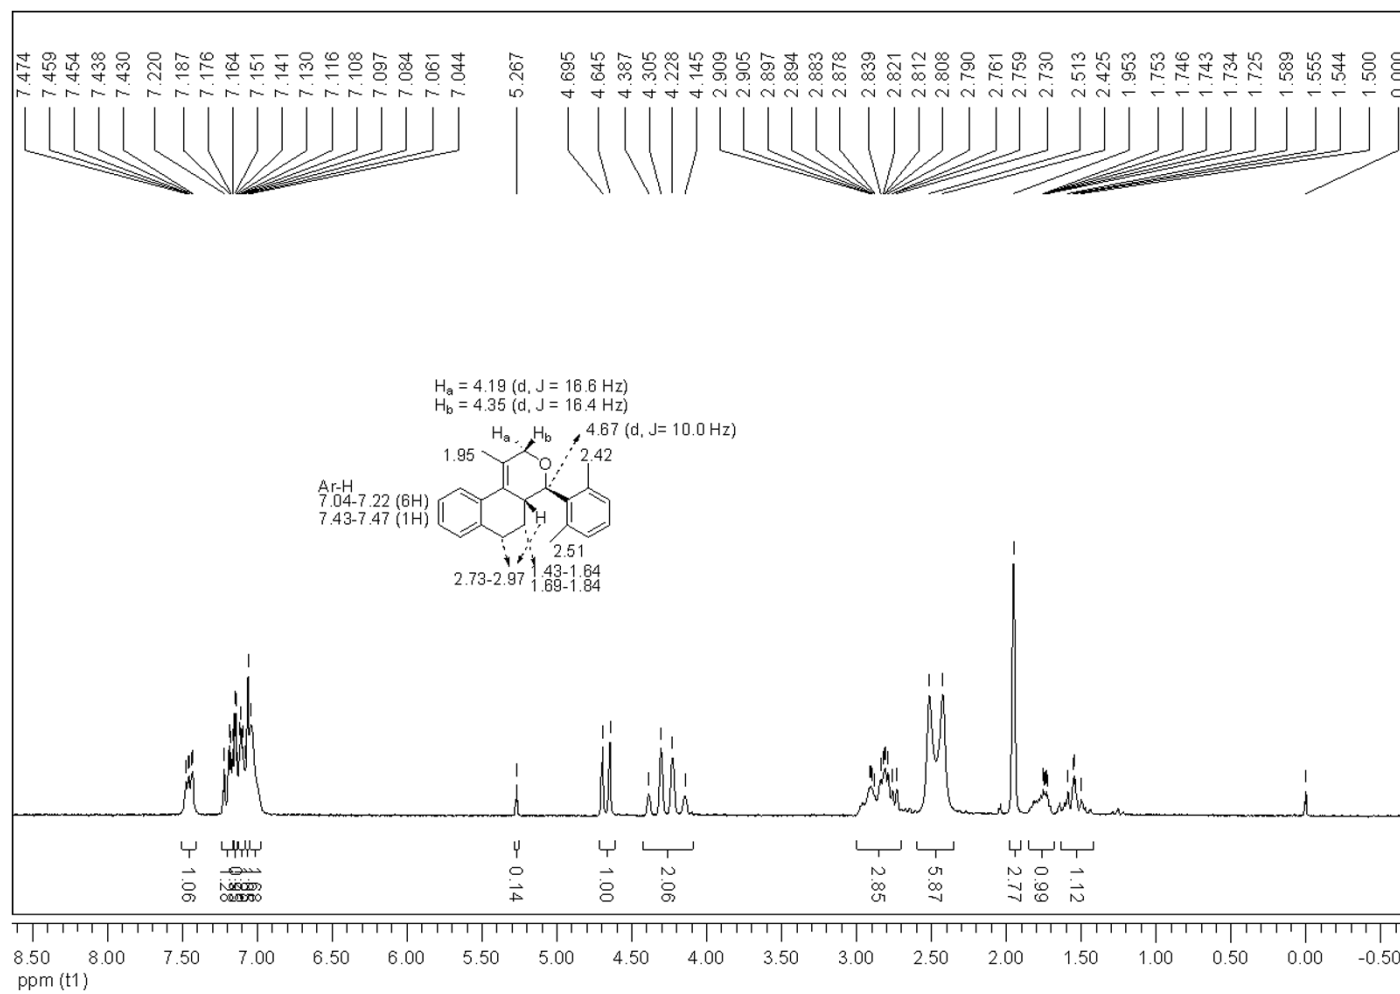

$^1\text{H}$ -NMR of compound **12g** (200 MHz,  $\text{CDCl}_3$ )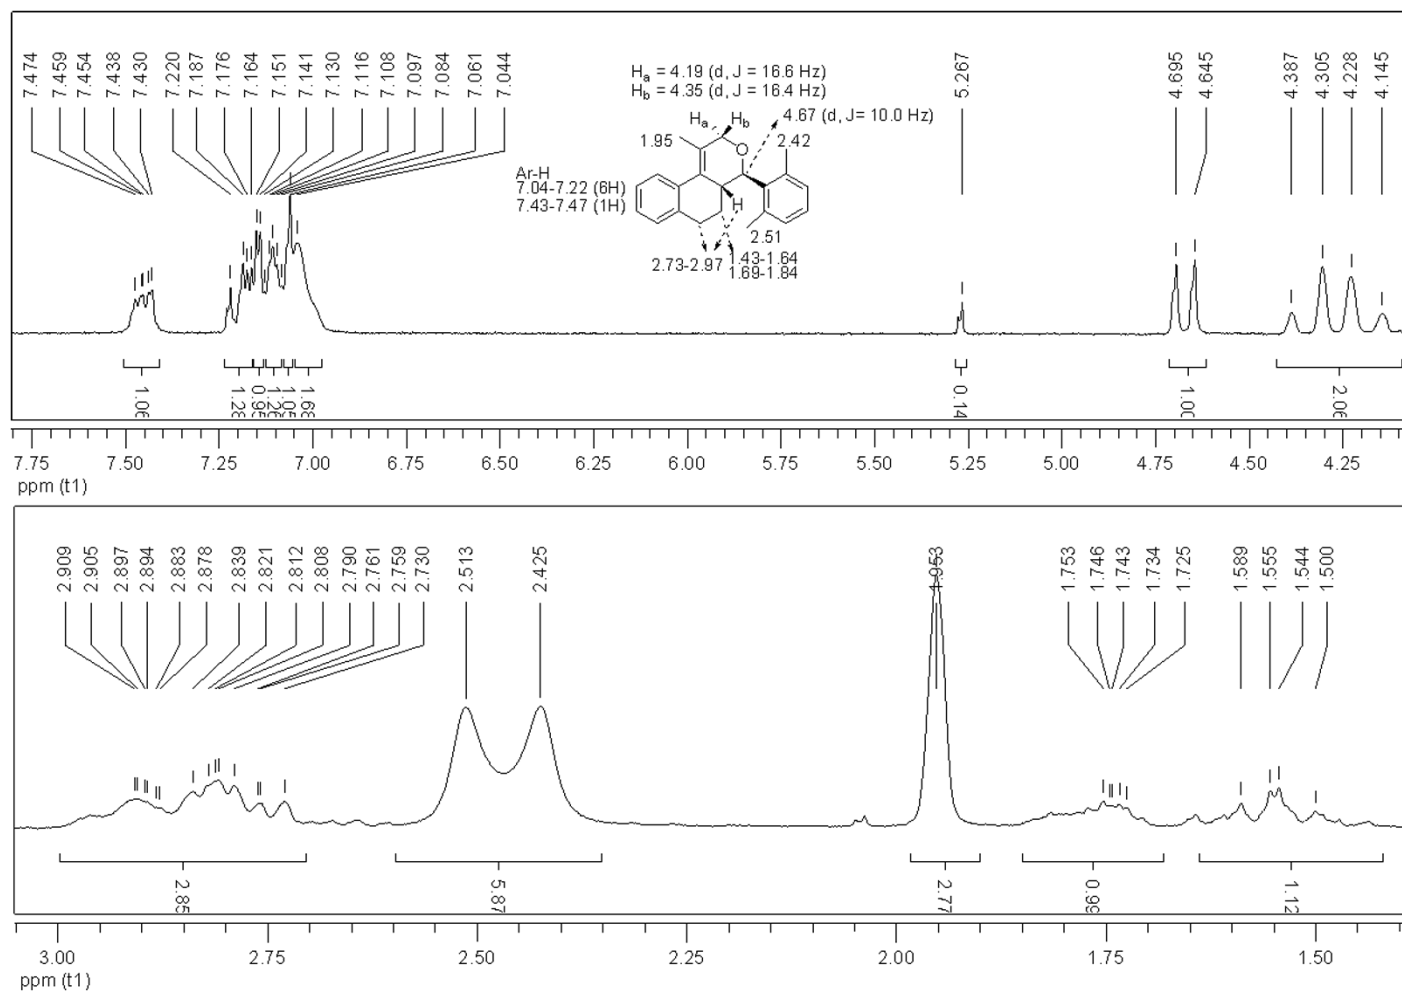

$^{13}\text{C}$ -NMR of compound **12g** (75 MHz,  $\text{CDCl}_3$ )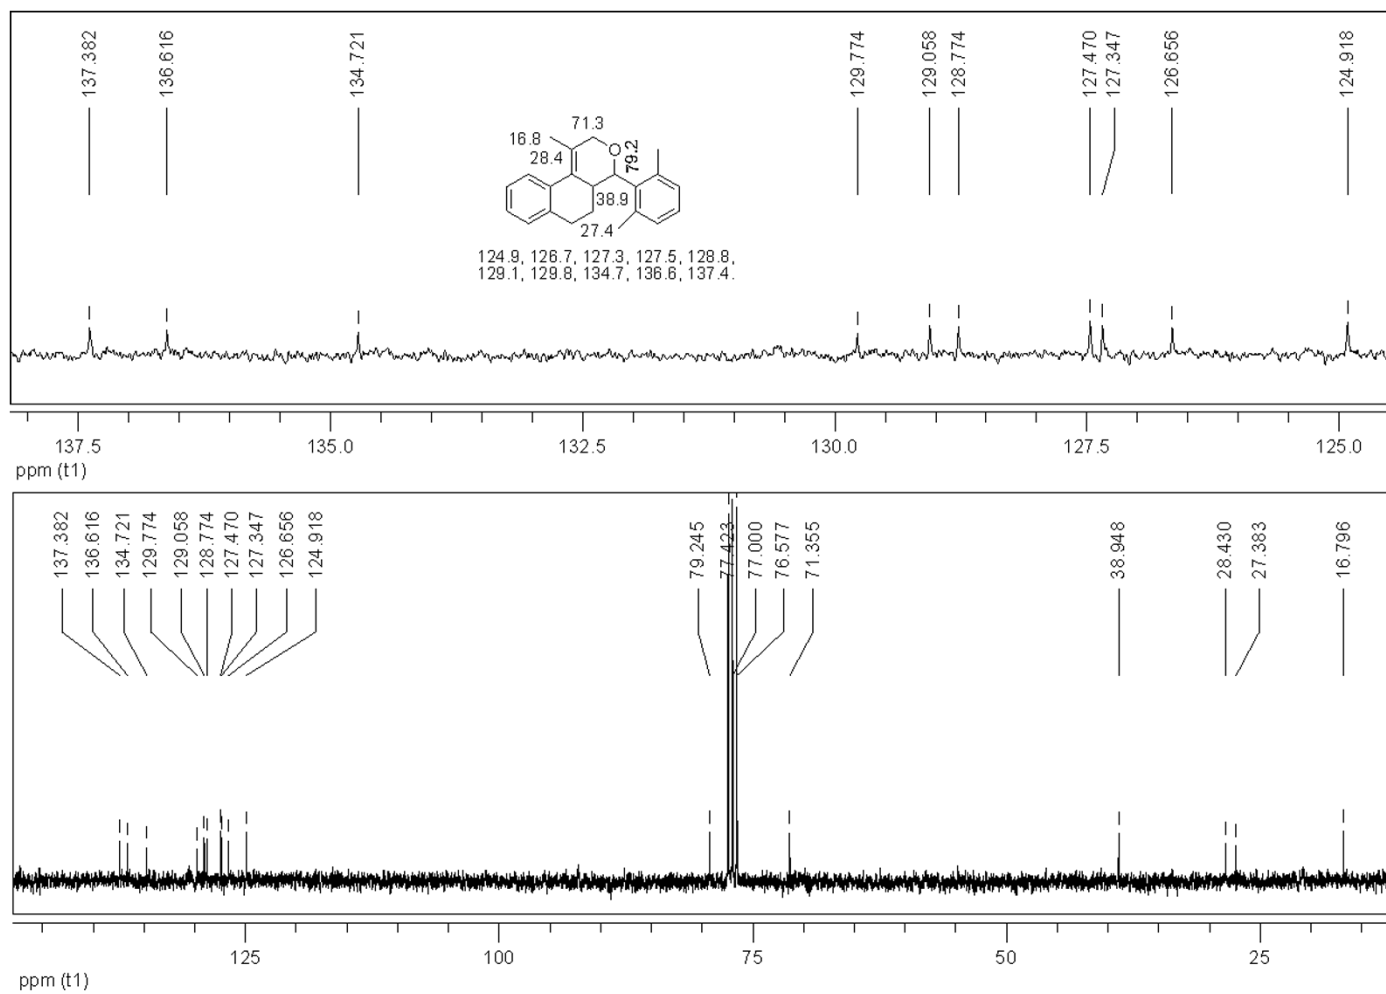

<sup>1</sup>H-NMR of compounds *cis*-**7g** and *trans*-**7g** (500 MHz, CDCl<sub>3</sub>)

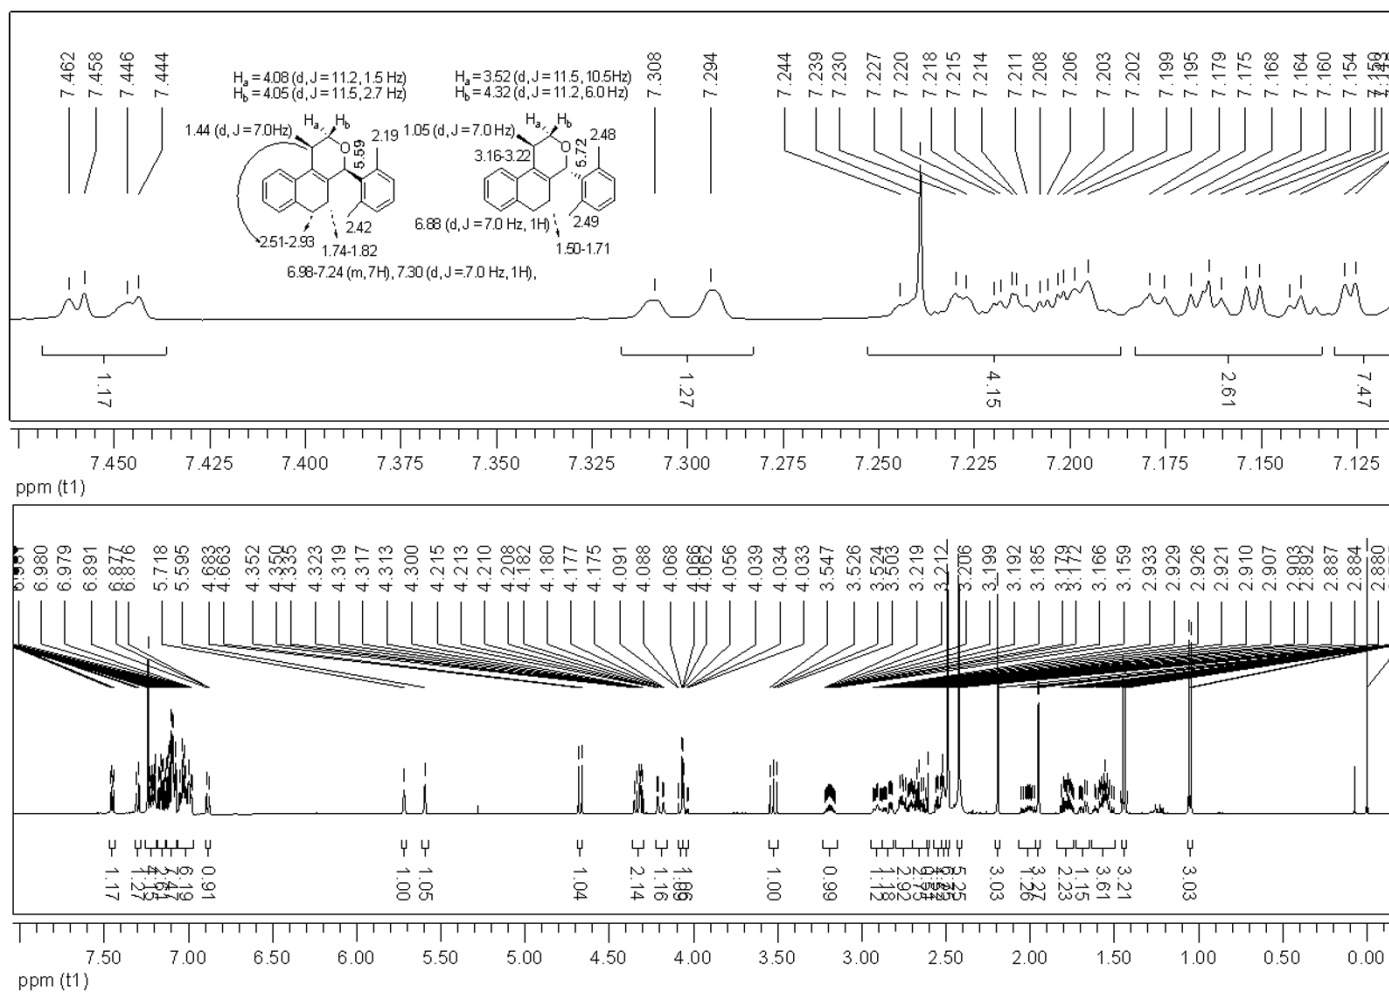

$^1\text{H}$ -NMR of compounds *cis*-**7g** and *trans*-**7g** (300 MHz,  $\text{CDCl}_3$ )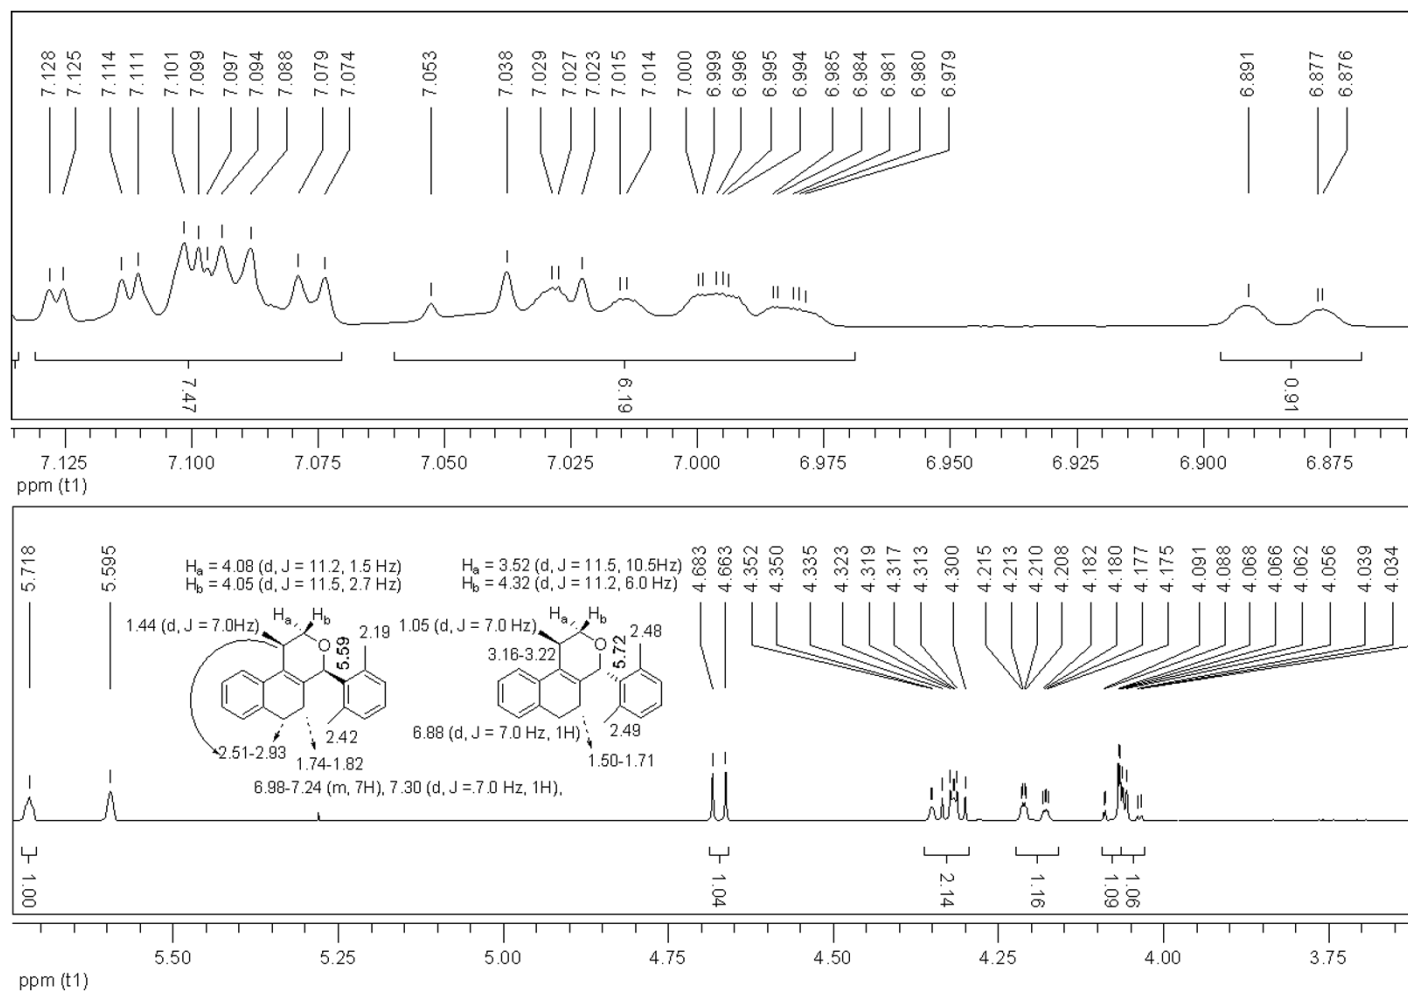

$^1\text{H}$ -NMR of compounds *cis*-**7g** and *trans*-**7g** (500 MHz,  $\text{CDCl}_3$ )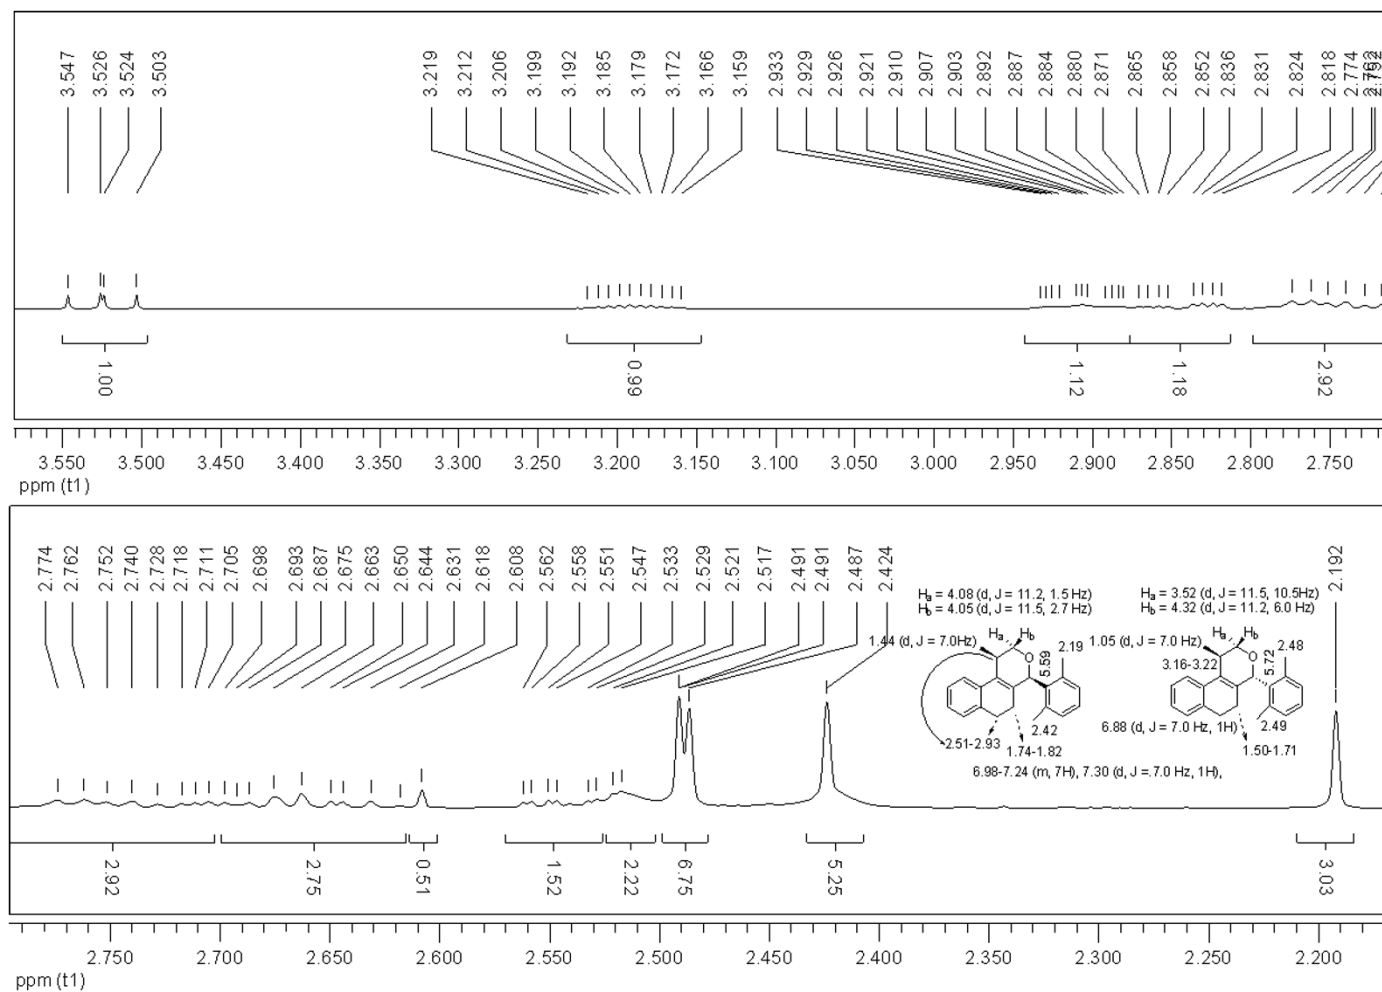

$^1\text{H}$ -NMR of compounds *cis*-**7g** and *trans*-**7g** (500 MHz,  $\text{CDCl}_3$ )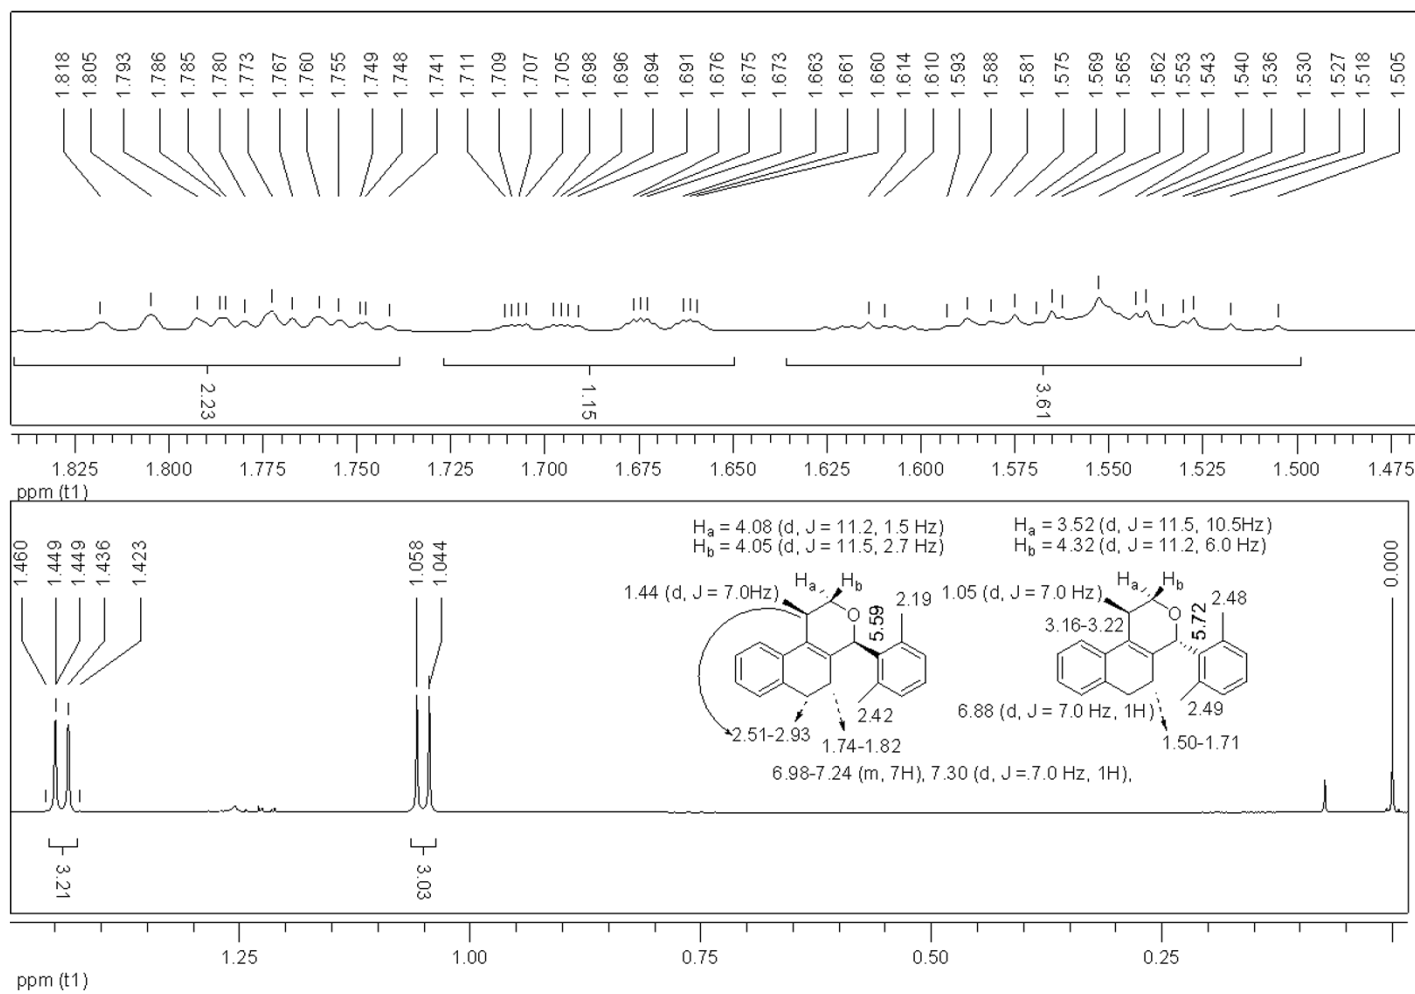

$^{13}\text{C}$ -NMR of compounds *cis*-7g and *trans*-7g (50 MHz,  $\text{CDCl}_3$ )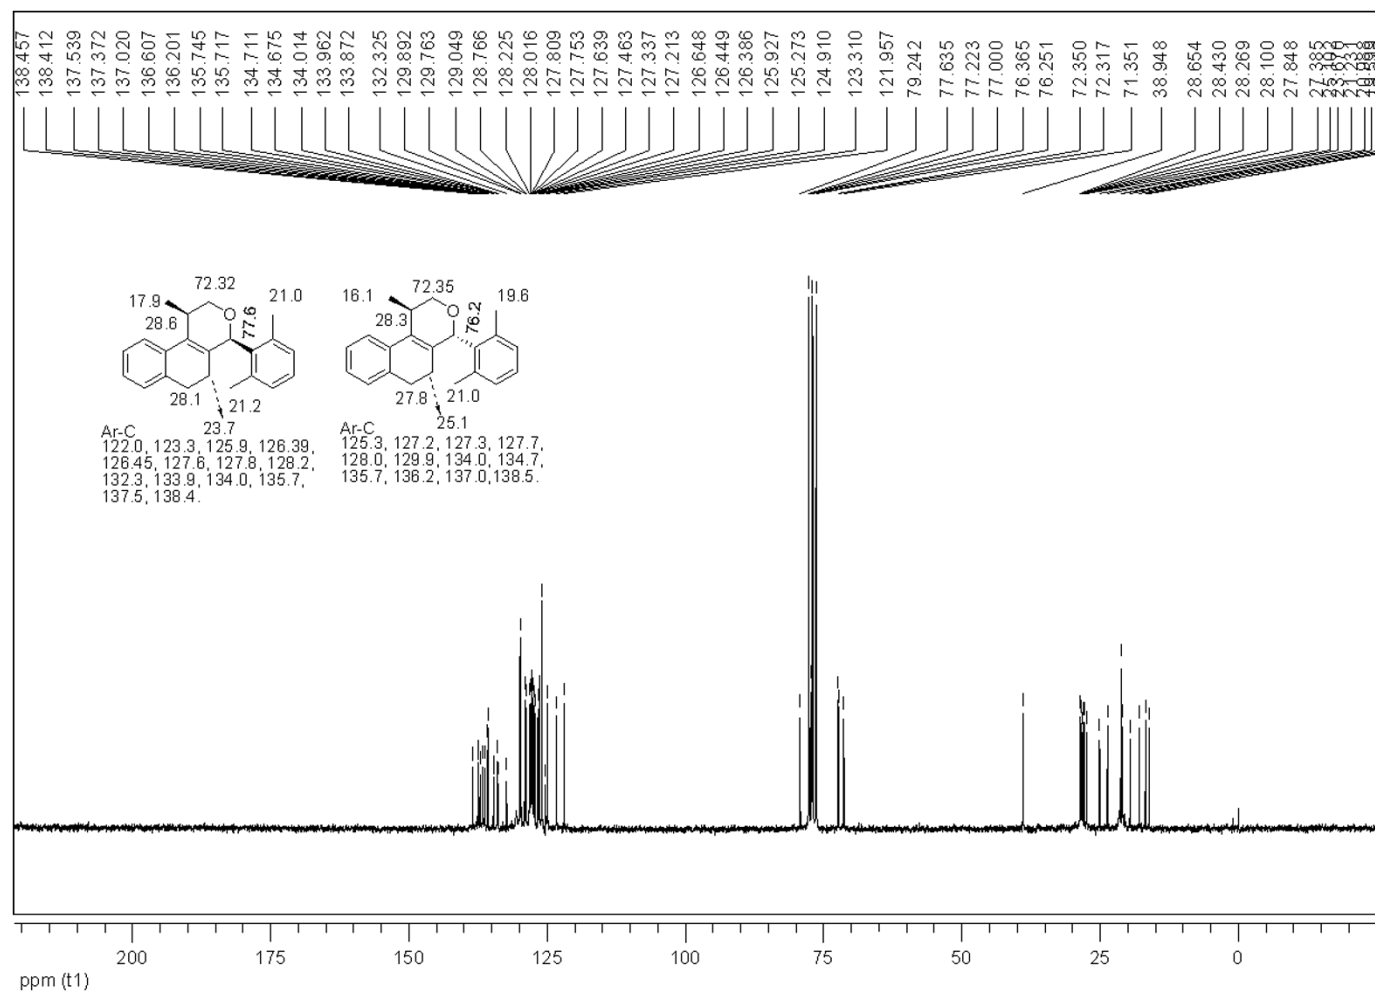

$^{13}\text{C}$ -NMR of compounds *cis*-7g and *trans*-7g (50 MHz,  $\text{CDCl}_3$ )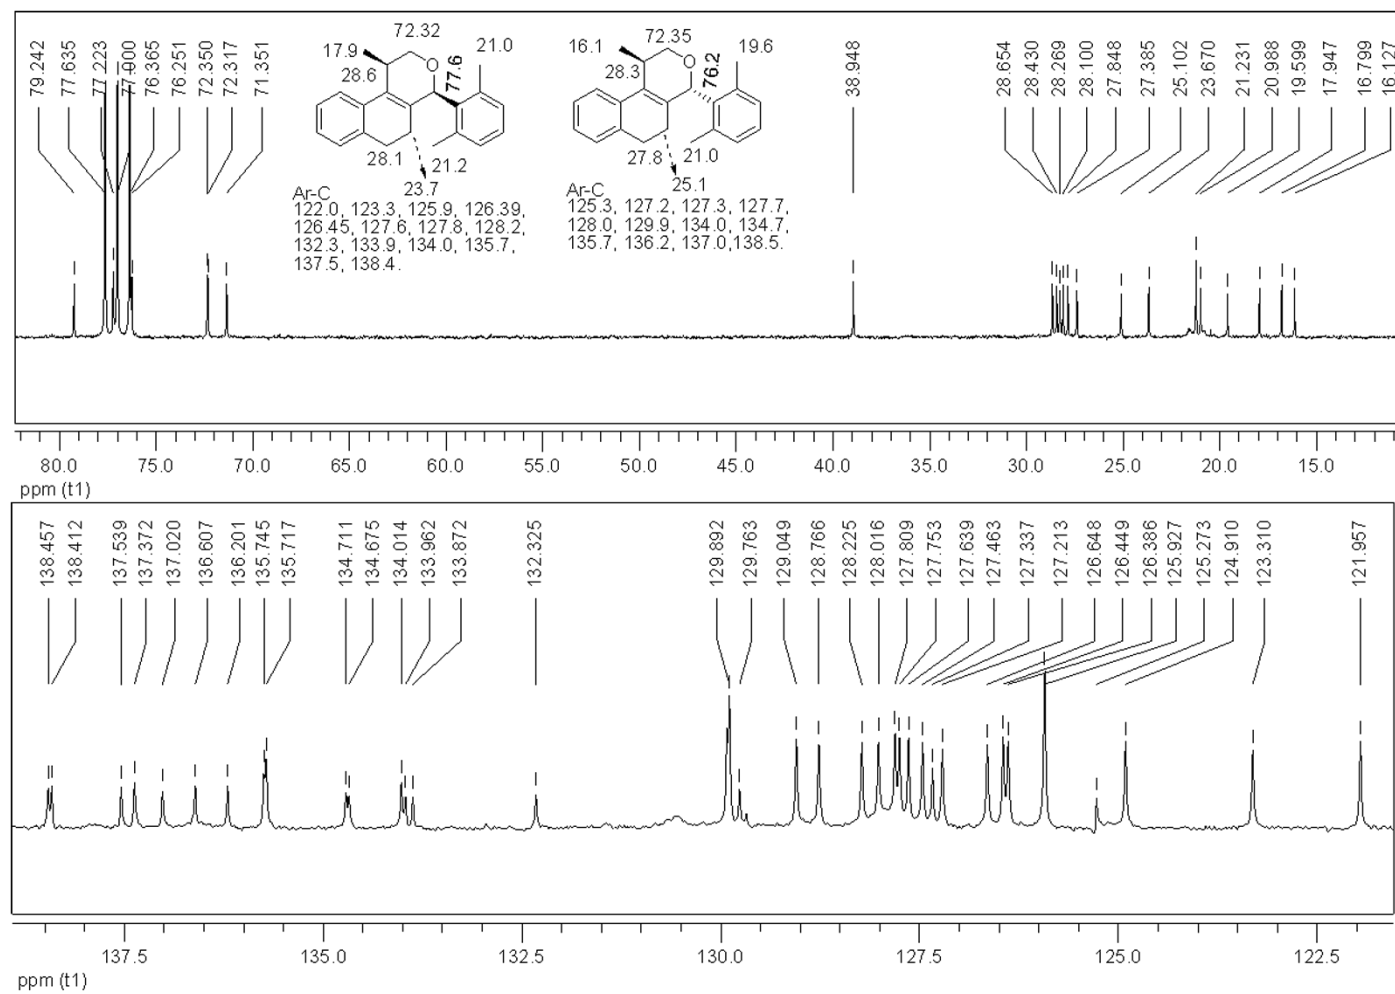

2D NOESY NMR of compound *cis*-7g (500 MHz, CDCl<sub>3</sub>)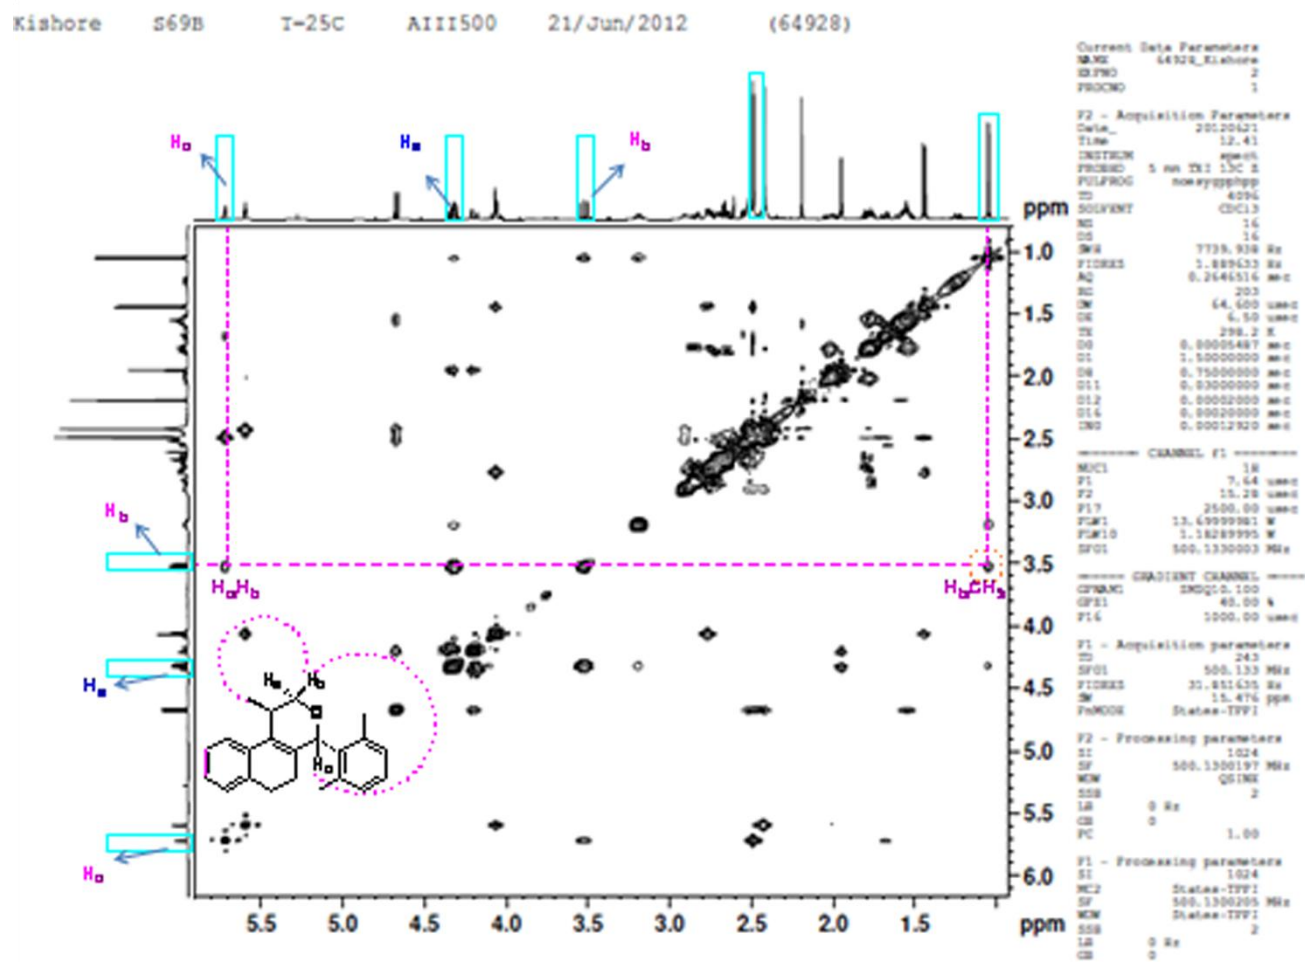

$^1\text{H}$ -NMR of compounds *cis*-**7i** and *trans*-**7i** (200 MHz,  $\text{CDCl}_3$ )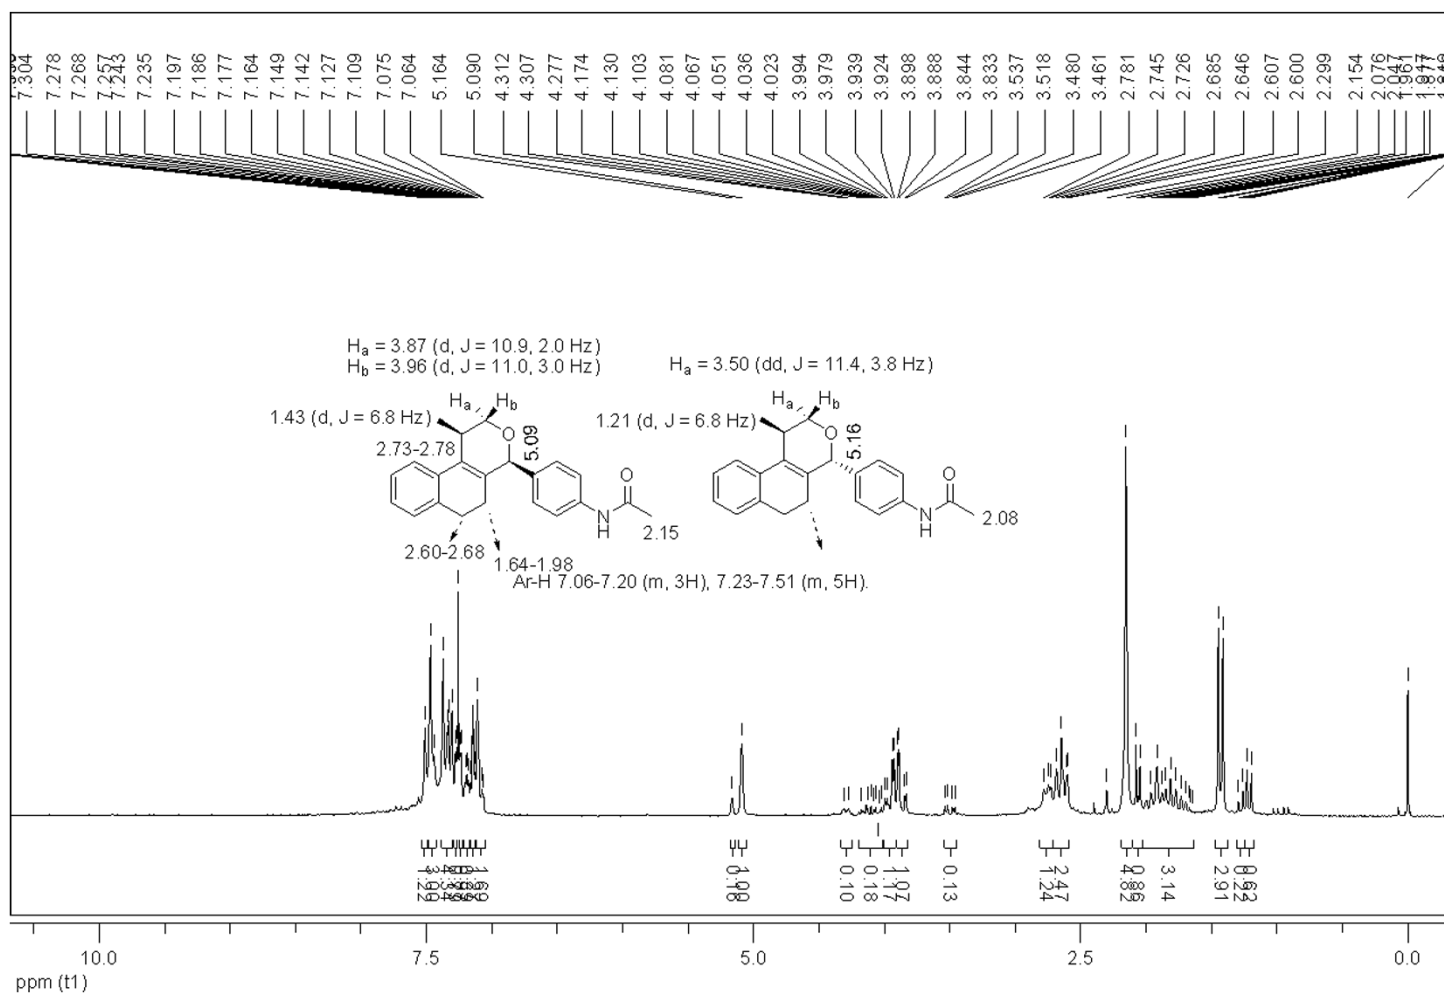

<sup>1</sup>H-NMR of compounds *cis-7i* and *trans-7i* (200 MHz, CDCl<sub>3</sub>)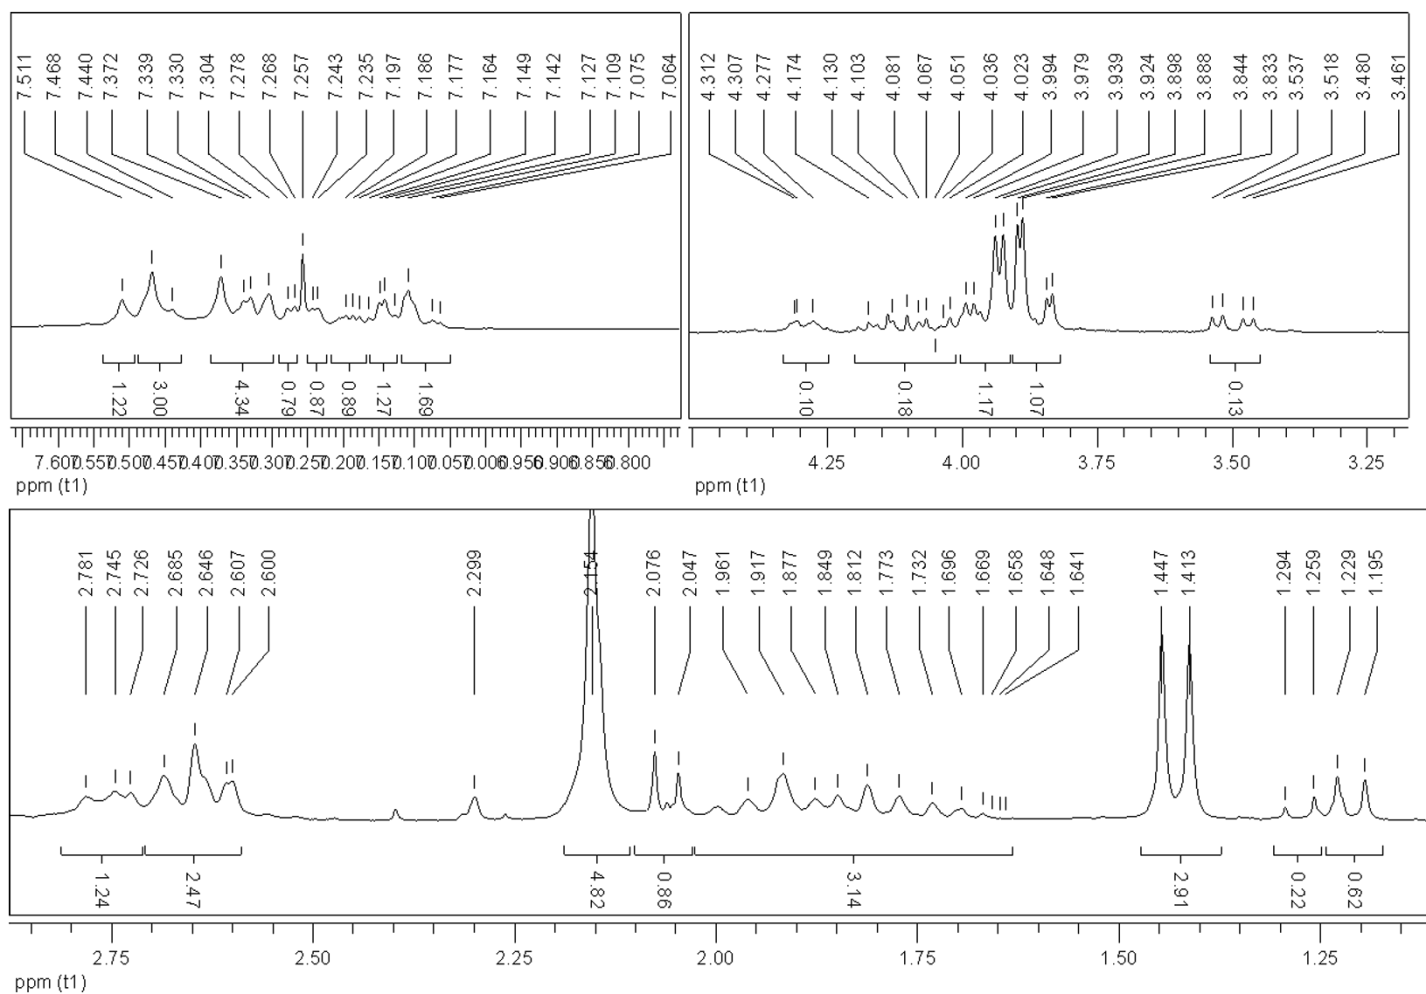

$^{13}\text{C}$ -NMR of compounds *cis*-**7i** and *trans*-**7i** (75 MHz,  $\text{CDCl}_3$ )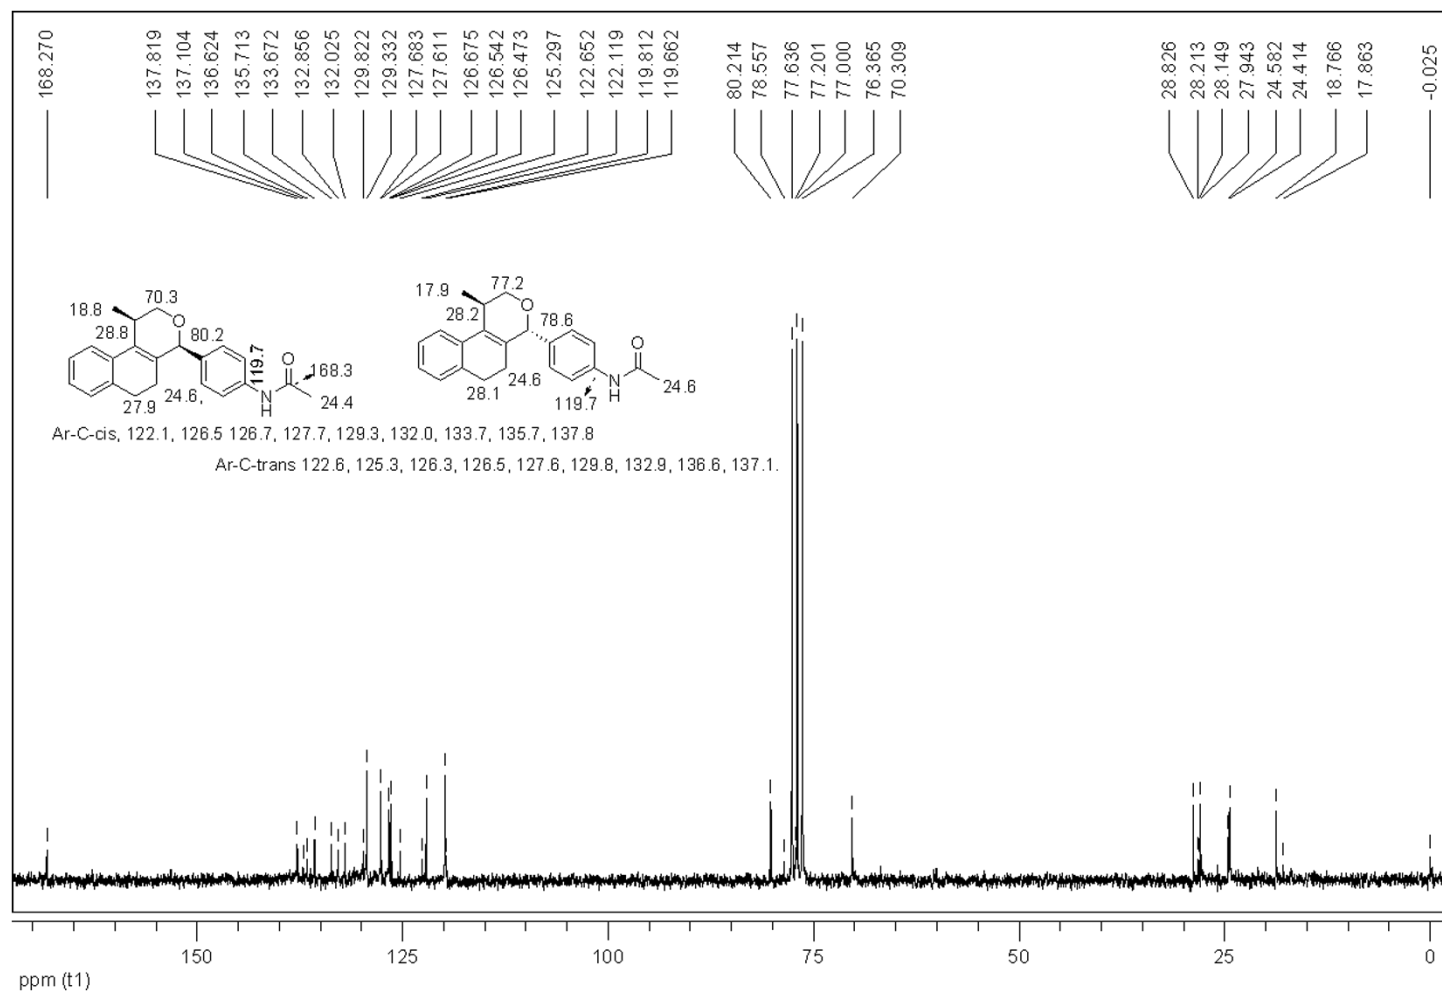

$^{13}\text{C}$ -NMR of compounds *cis*-**7i** and *trans*-**7i** (75 MHz,  $\text{CDCl}_3$ )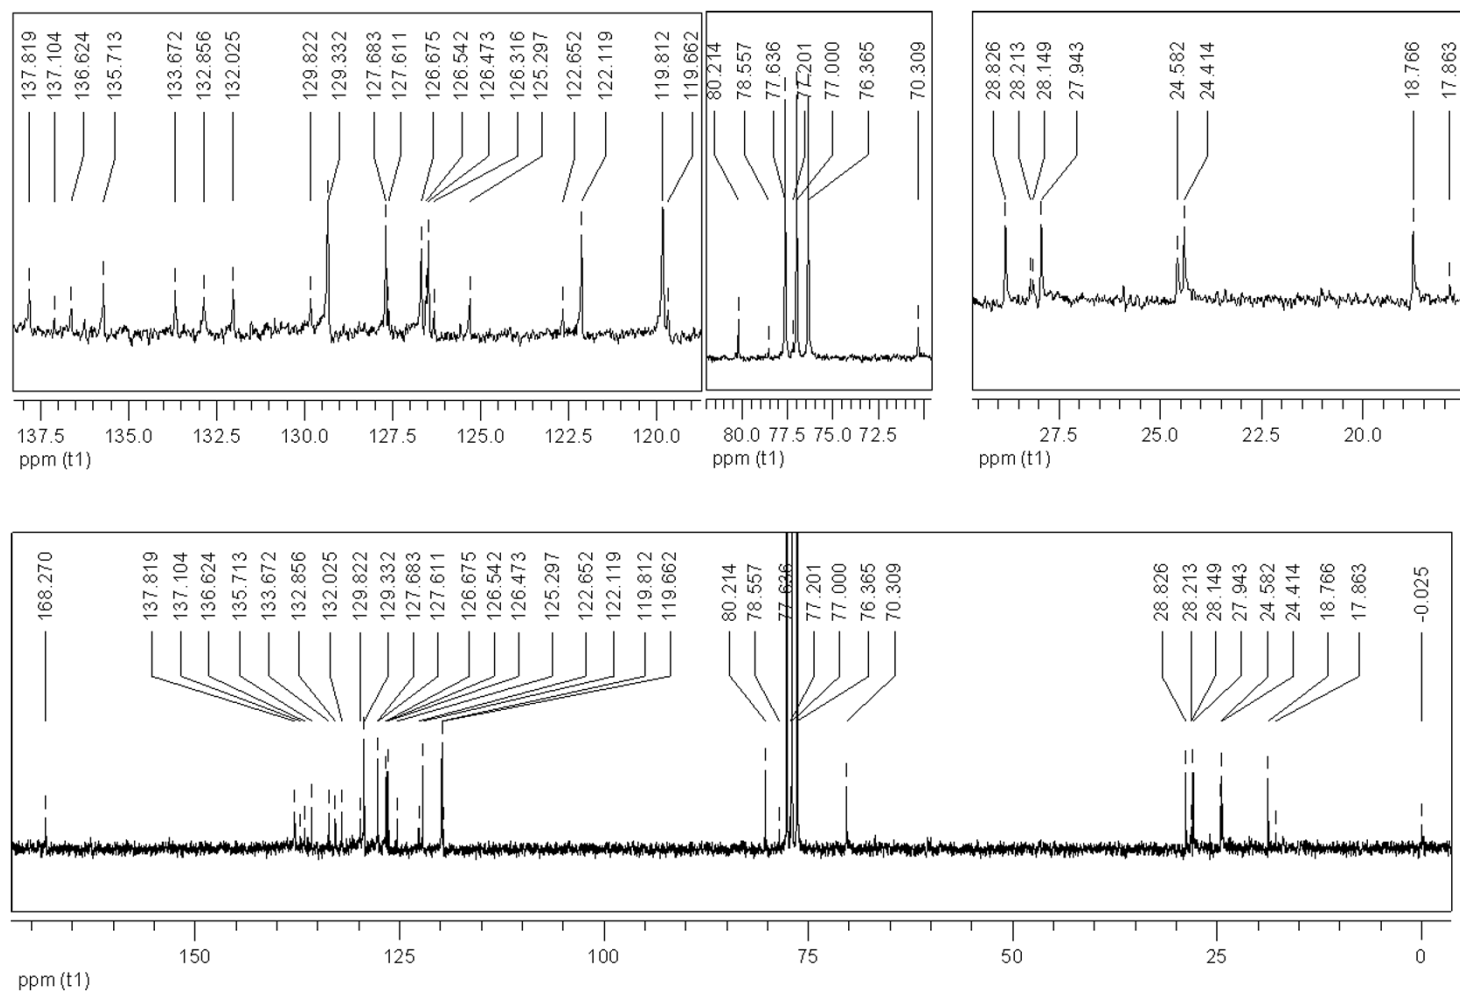

<sup>1</sup>H-NMR of compound *cis*-7j (200 MHz, CDCl<sub>3</sub>)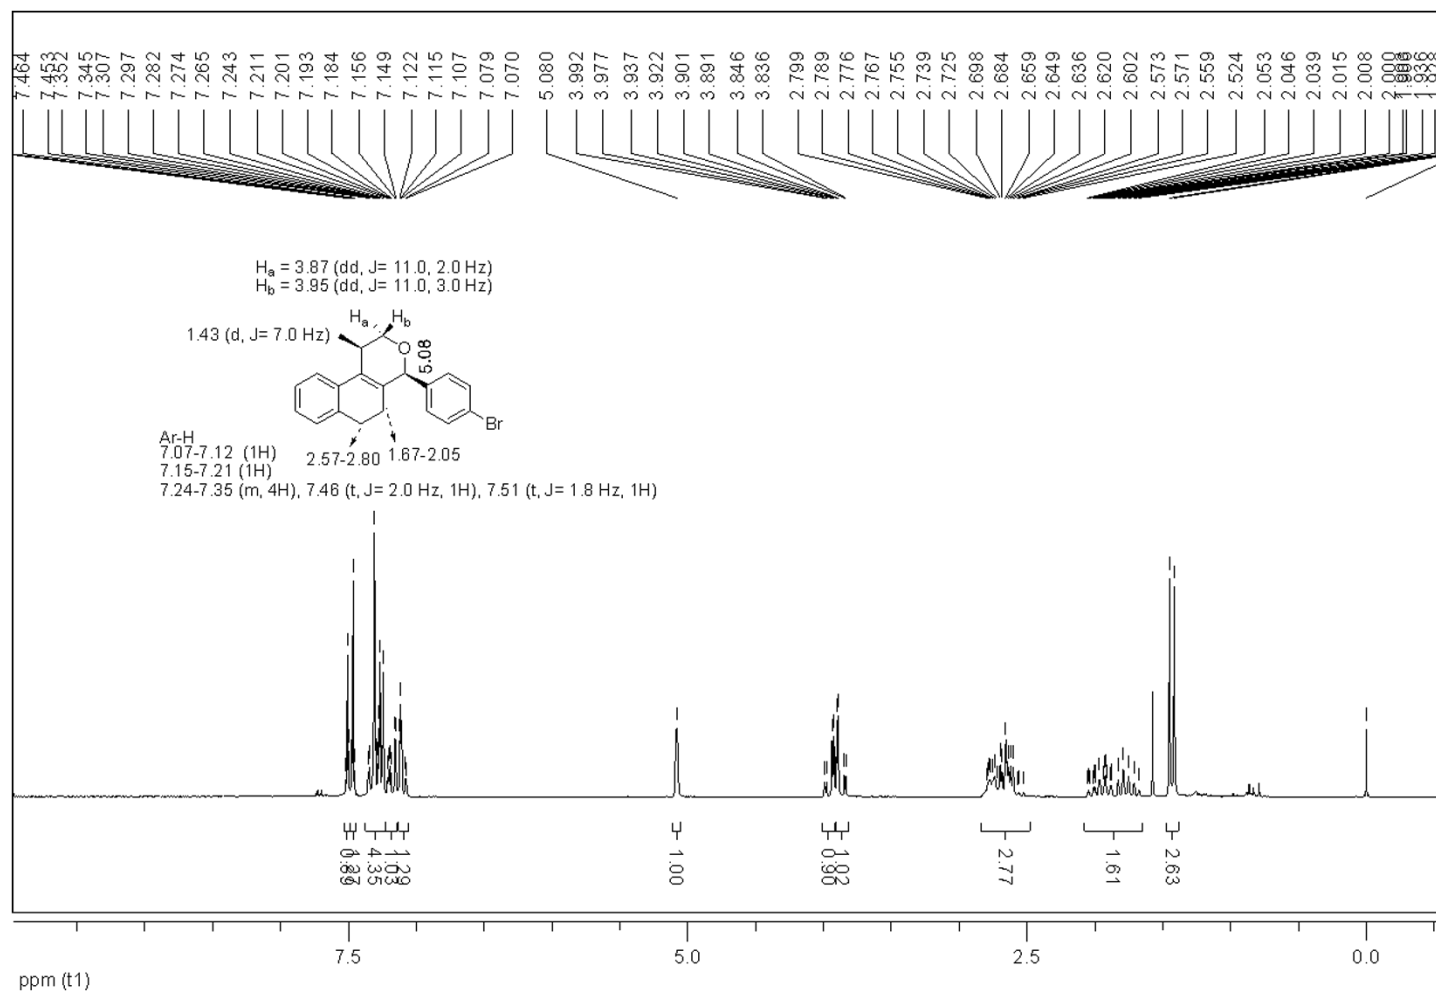

$^{13}\text{C}$ -NMR of compound *cis*-7j (50 MHz,  $\text{CDCl}_3$ )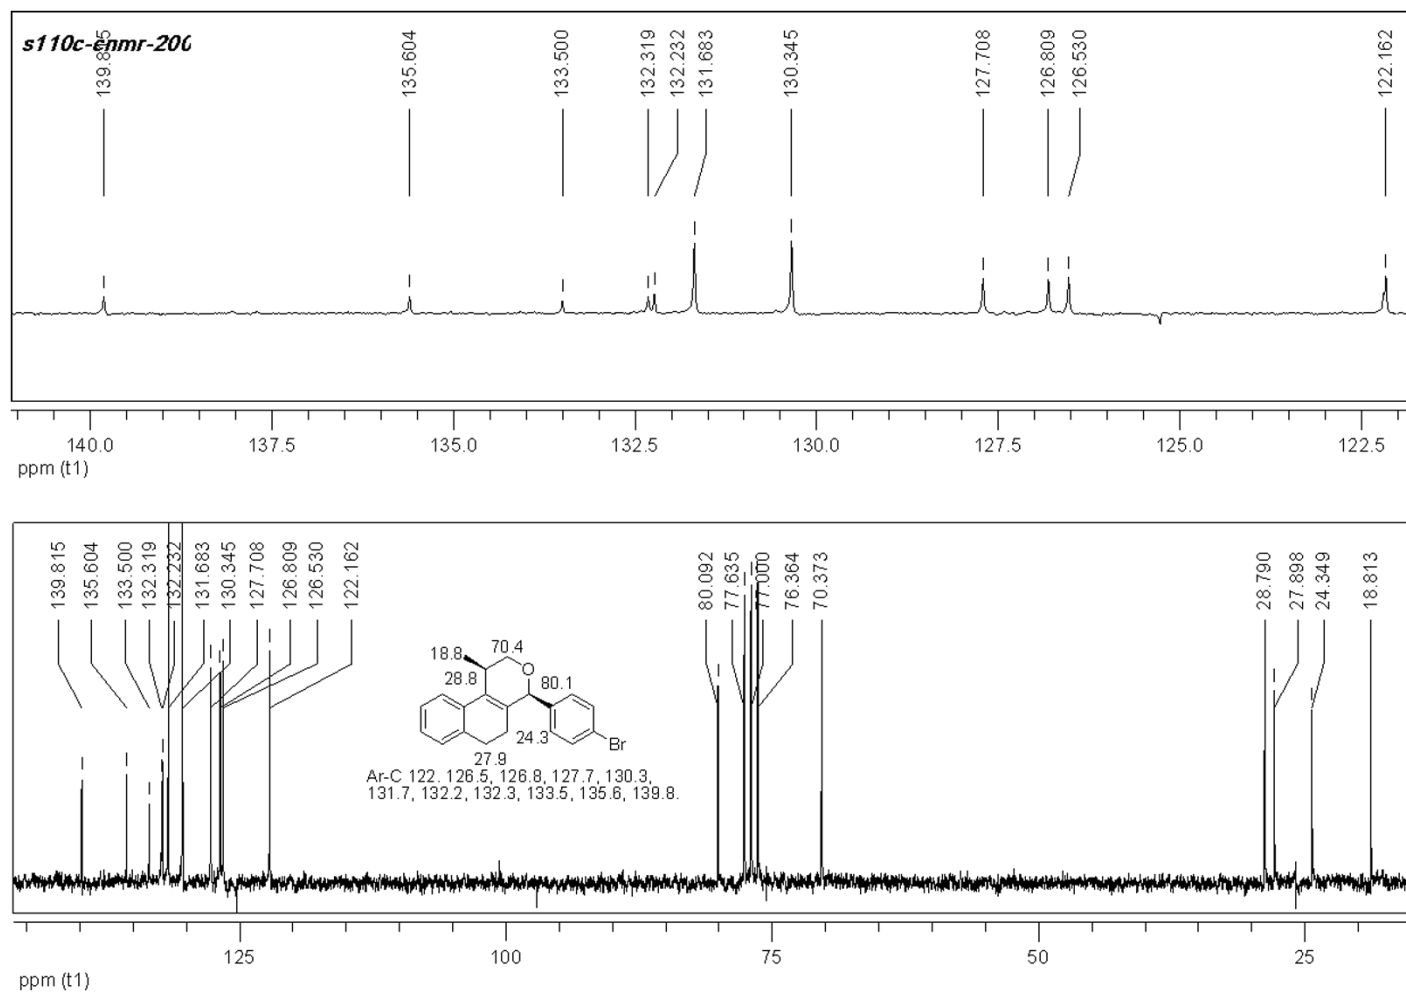

$^1\text{H}$ -NMR of compounds **12j** and *trans*-**7j** (200 MHz,  $\text{CDCl}_3$ )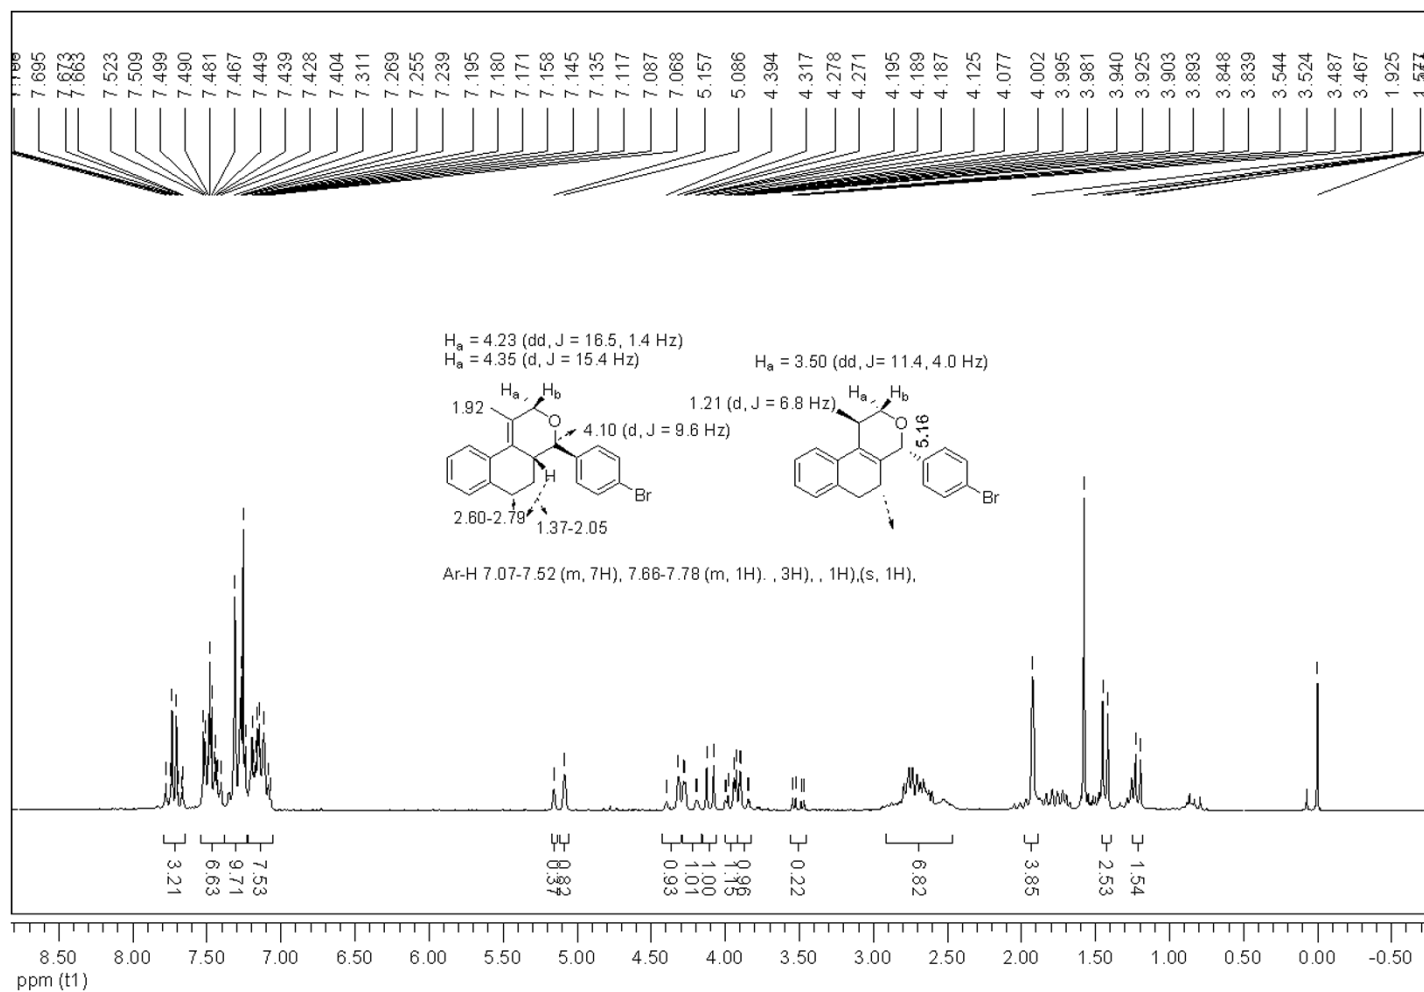

$^1\text{H}$ -NMR of compounds **12j** and *trans*-**7j** (200 MHz,  $\text{CDCl}_3$ )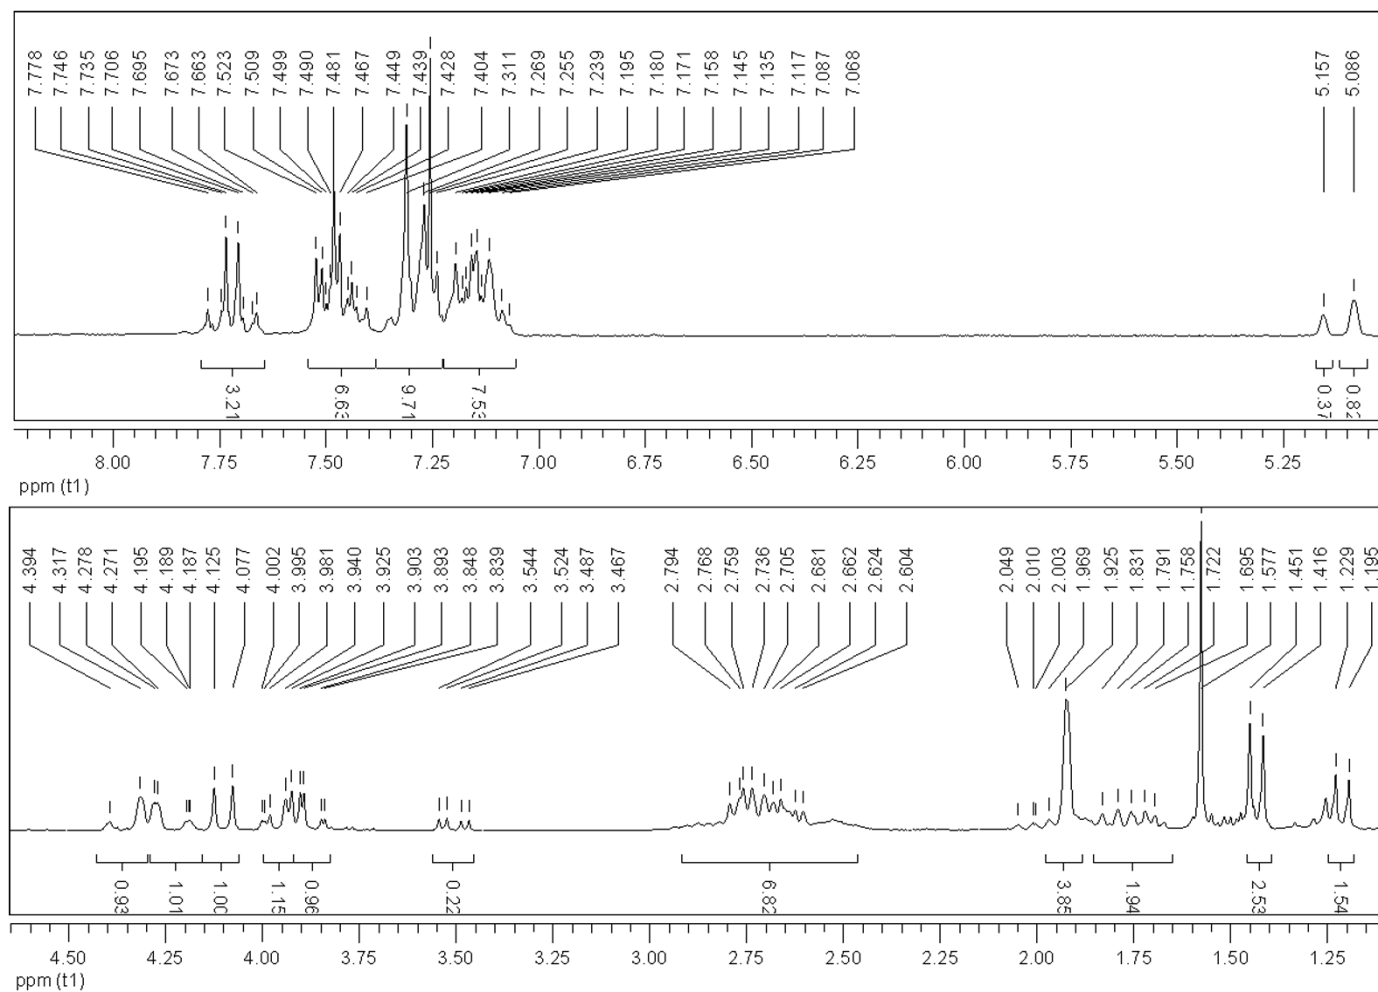

$^{13}\text{C}$ -NMR of compounds **12j** and *trans*-**7j** (50 MHz,  $\text{CDCl}_3$ )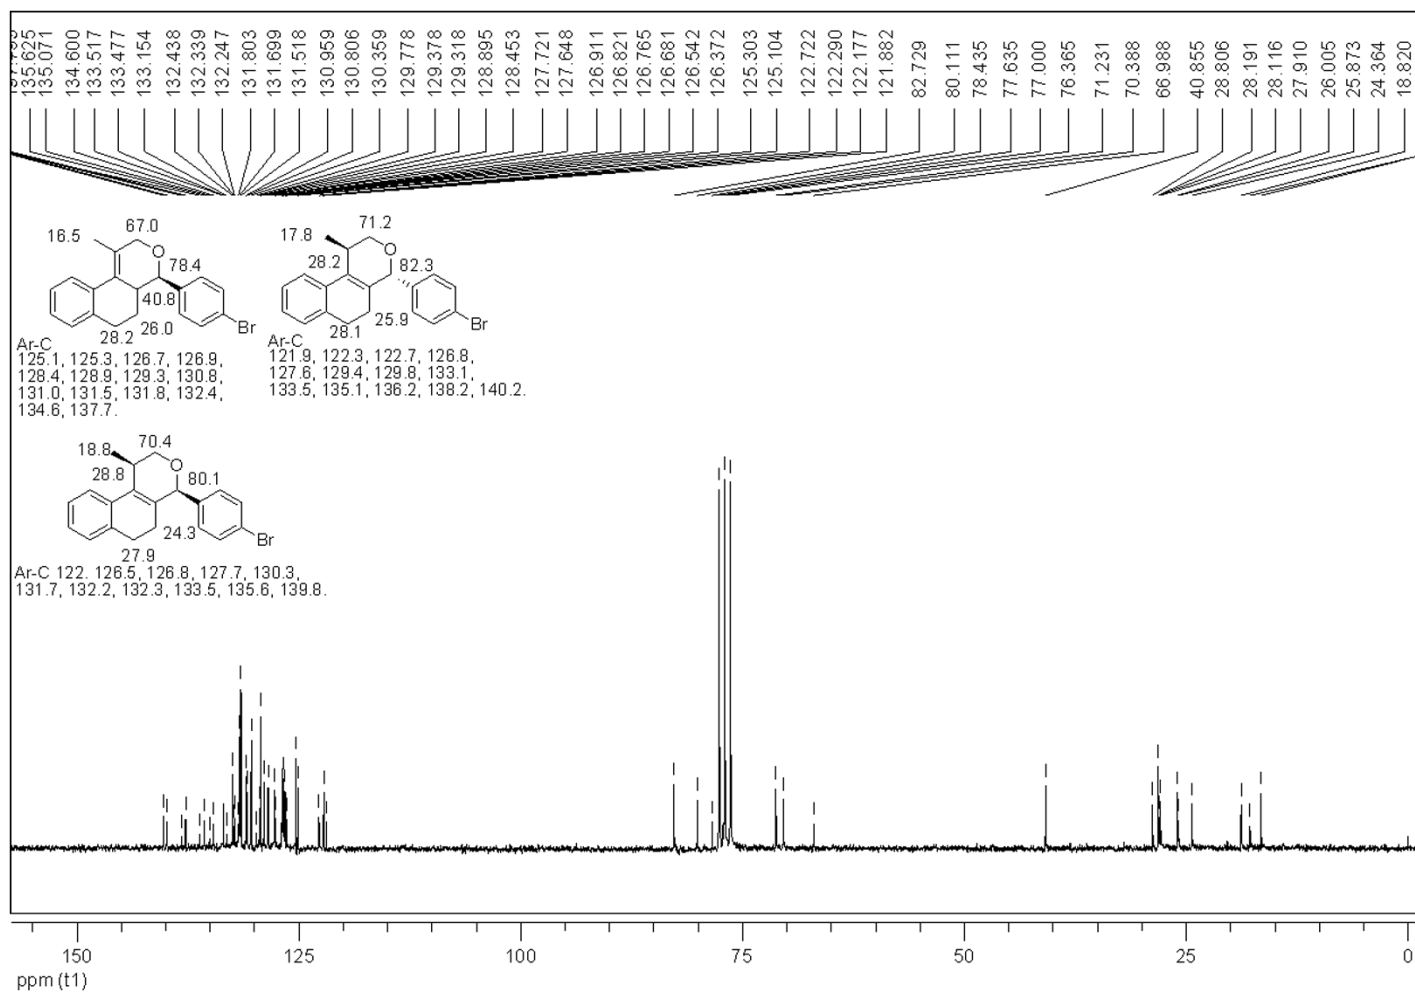

$^{13}\text{C}$ -NMR of compounds **12j** and *trans*-**7j** (50 MHz,  $\text{CDCl}_3$ )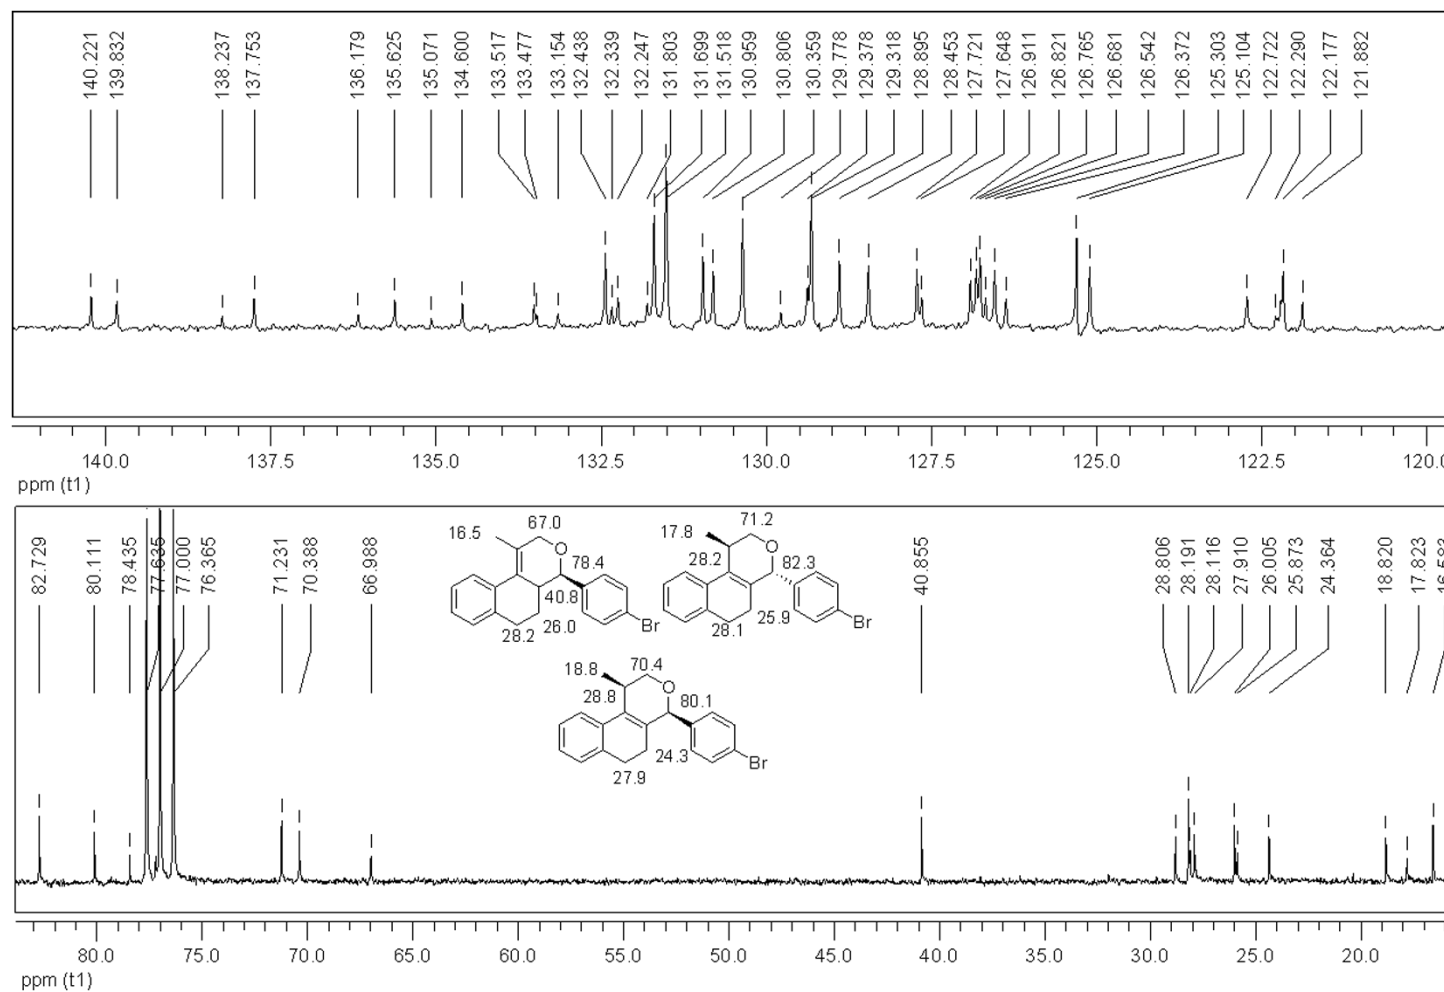

<sup>1</sup>H-NMR of compound *cis*-**7k** (500 MHz, CDCl<sub>3</sub>)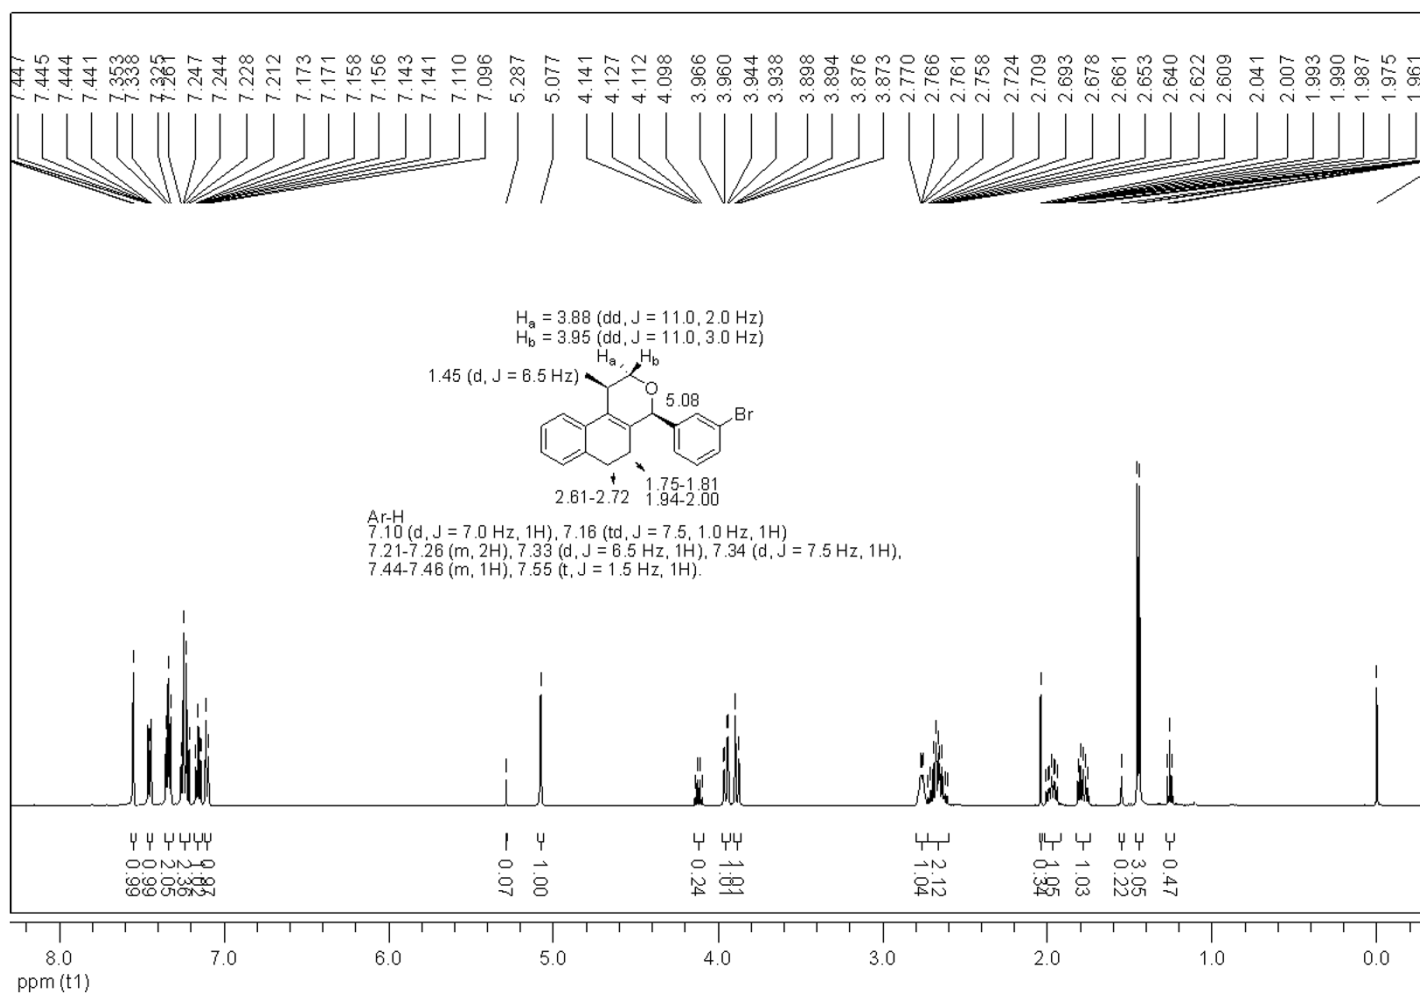

$^1\text{H}$ -NMR of compound *cis*-**7k** (300 MHz,  $\text{CDCl}_3$ )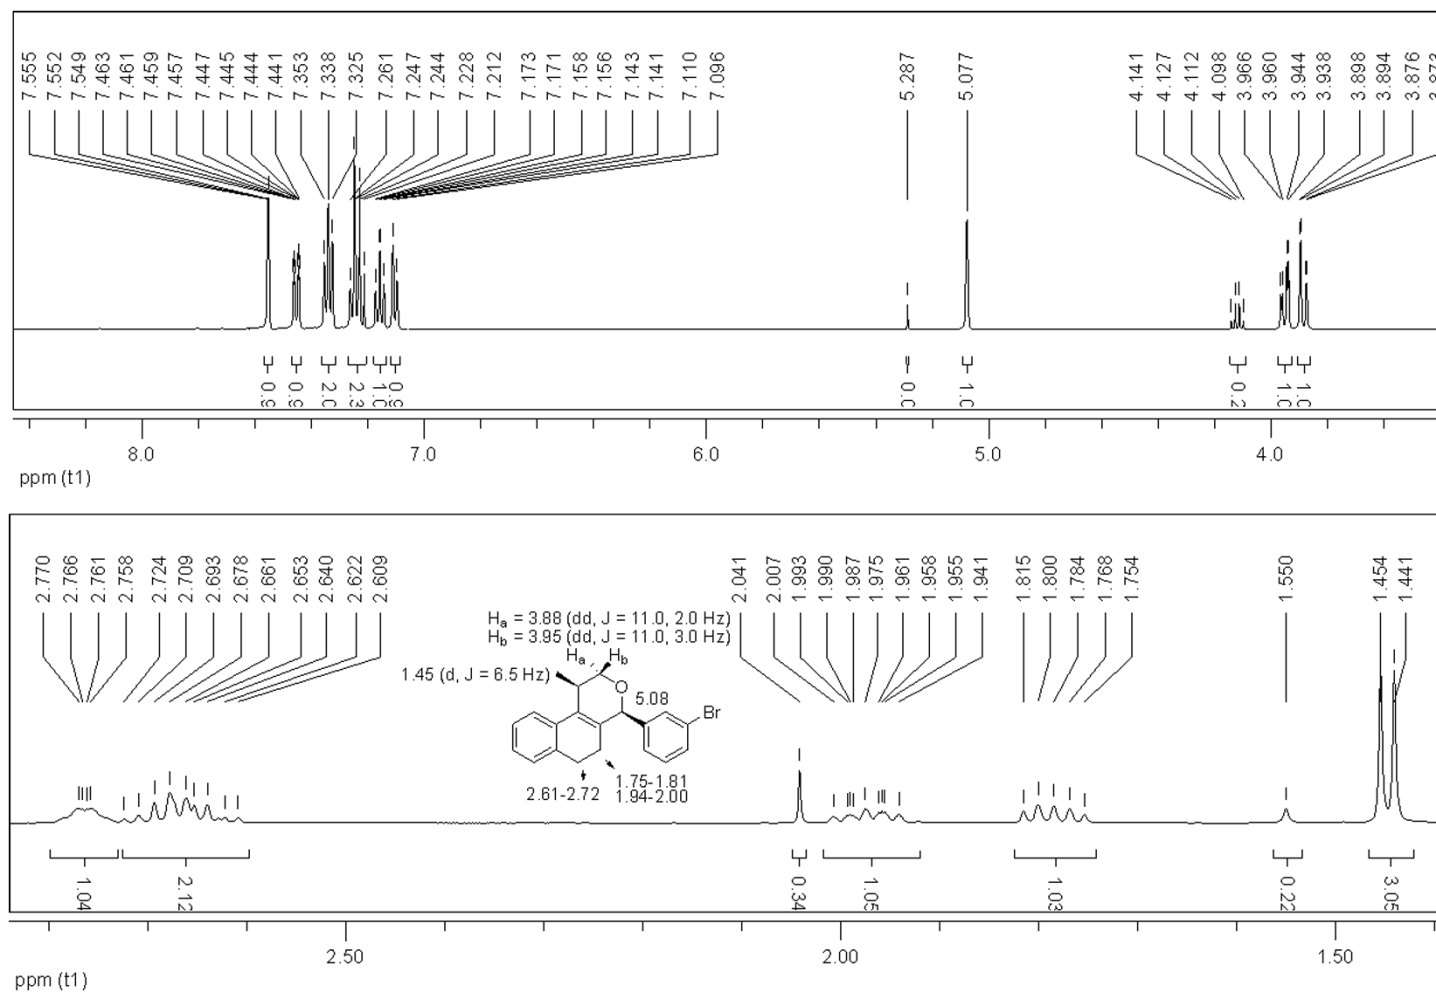

$^{13}\text{C}$ -NMR of compound *cis*-**7k** (75 MHz,  $\text{CDCl}_3$ )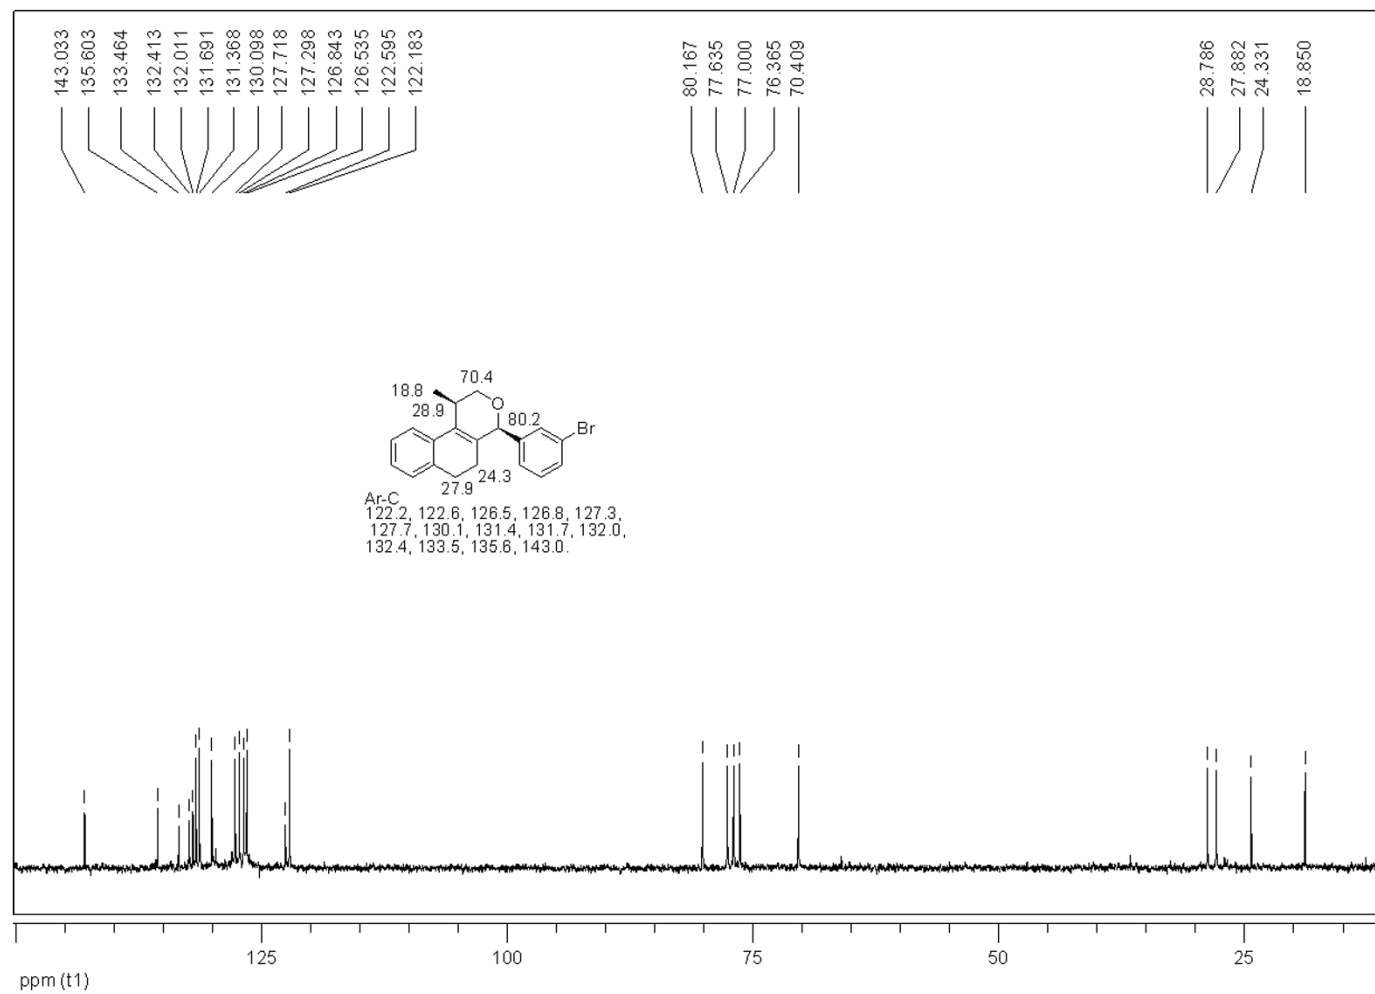

$^{13}\text{C}$ -NMR of compound *cis*-**7k** (75 MHz,  $\text{CDCl}_3$ )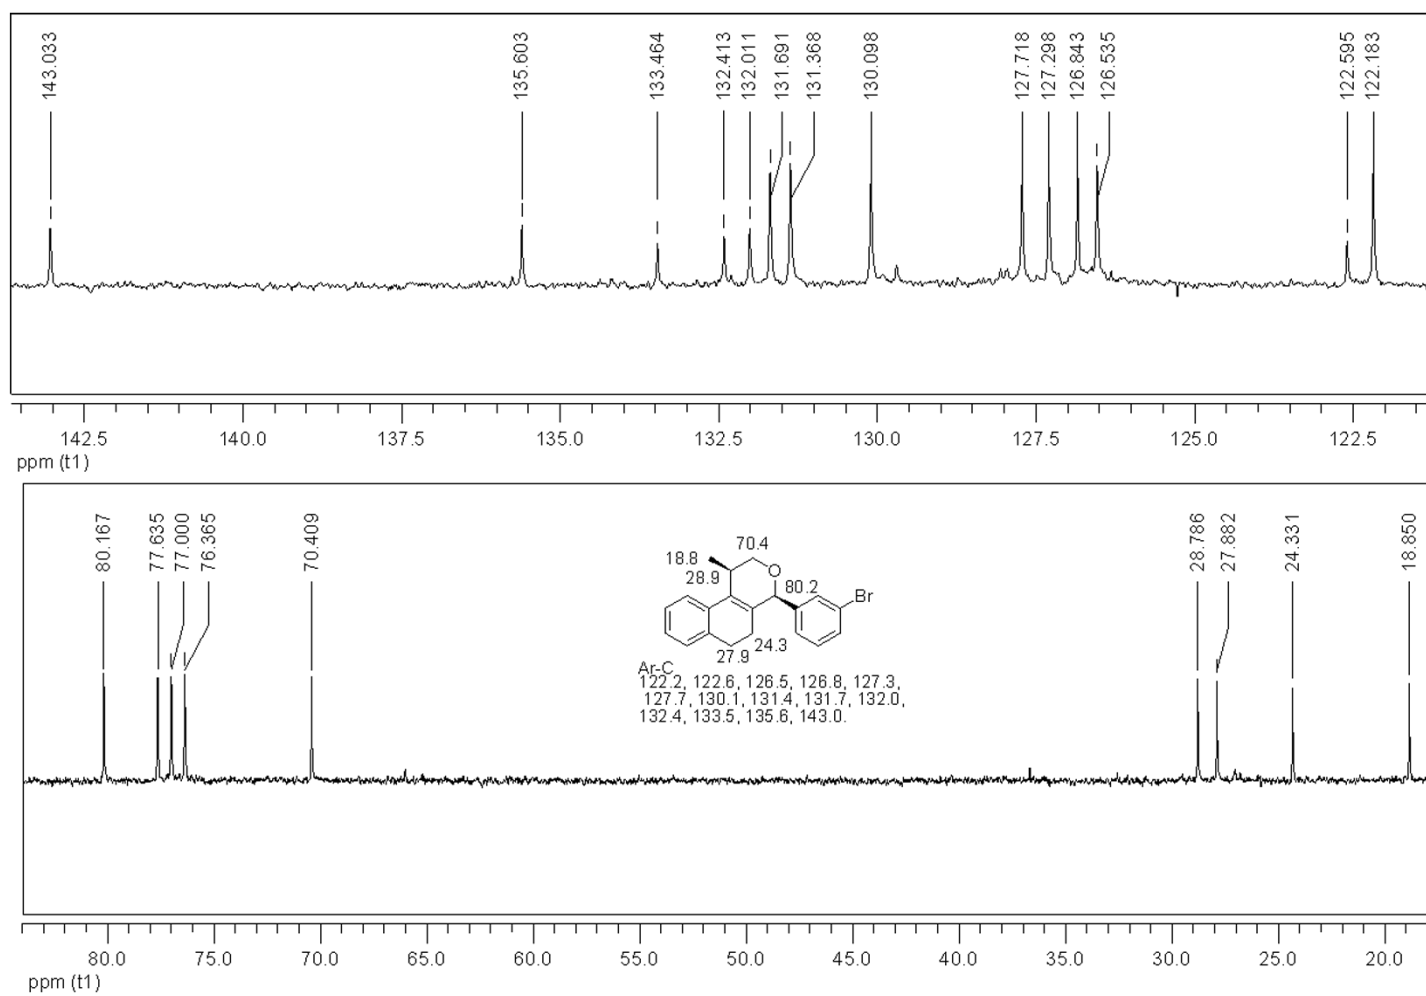

2D NOESY NMR of compound *cis-7k* (500 MHz, CDCl<sub>3</sub>)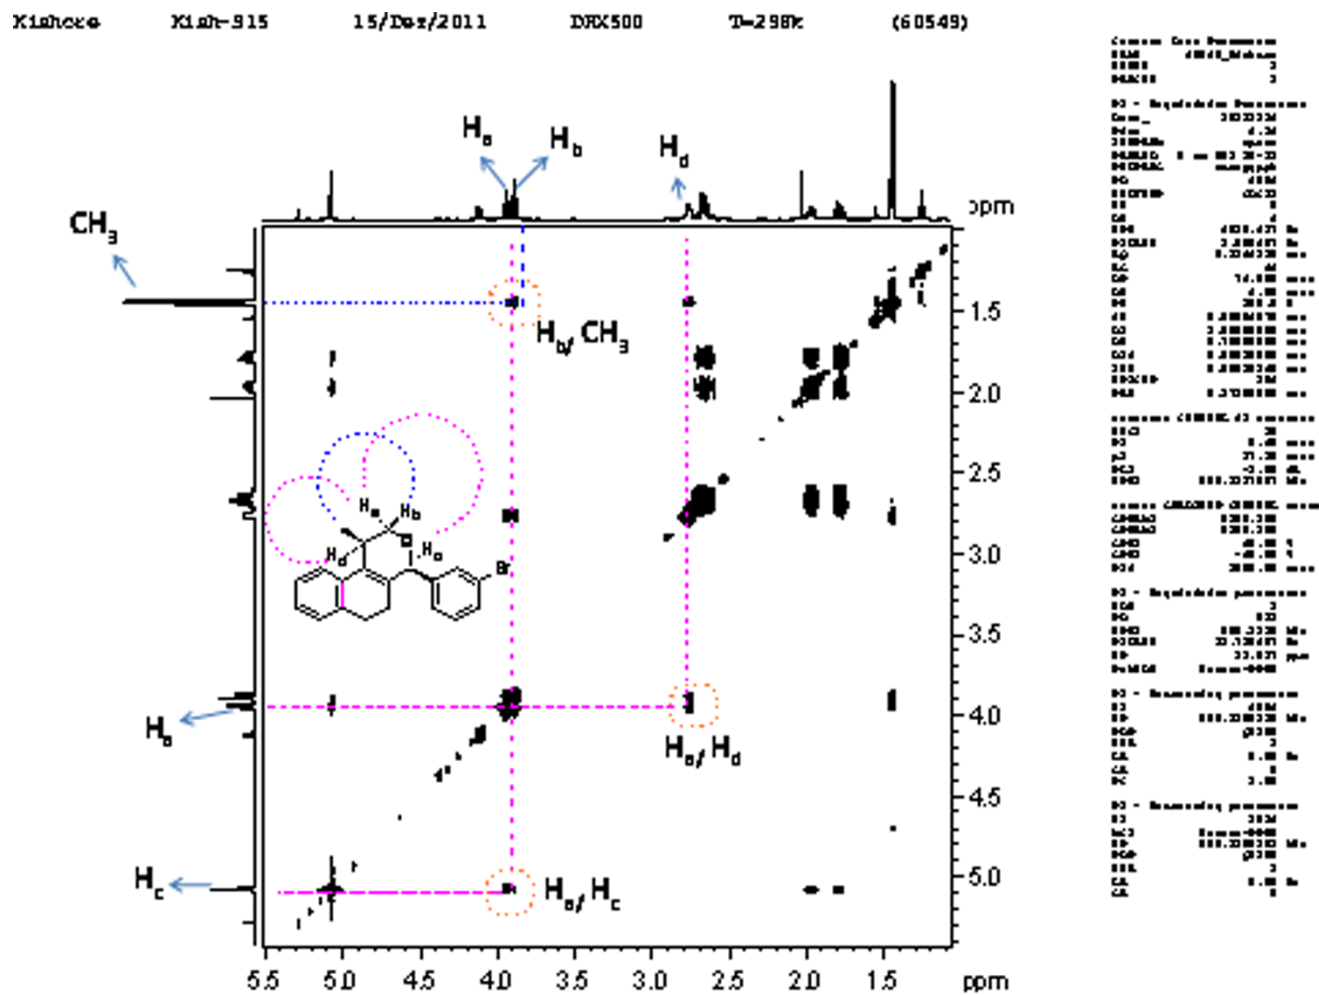

$^1\text{H}$ -NMR of compounds *cis*-**71** and **121** (500 MHz,  $\text{CDCl}_3$ )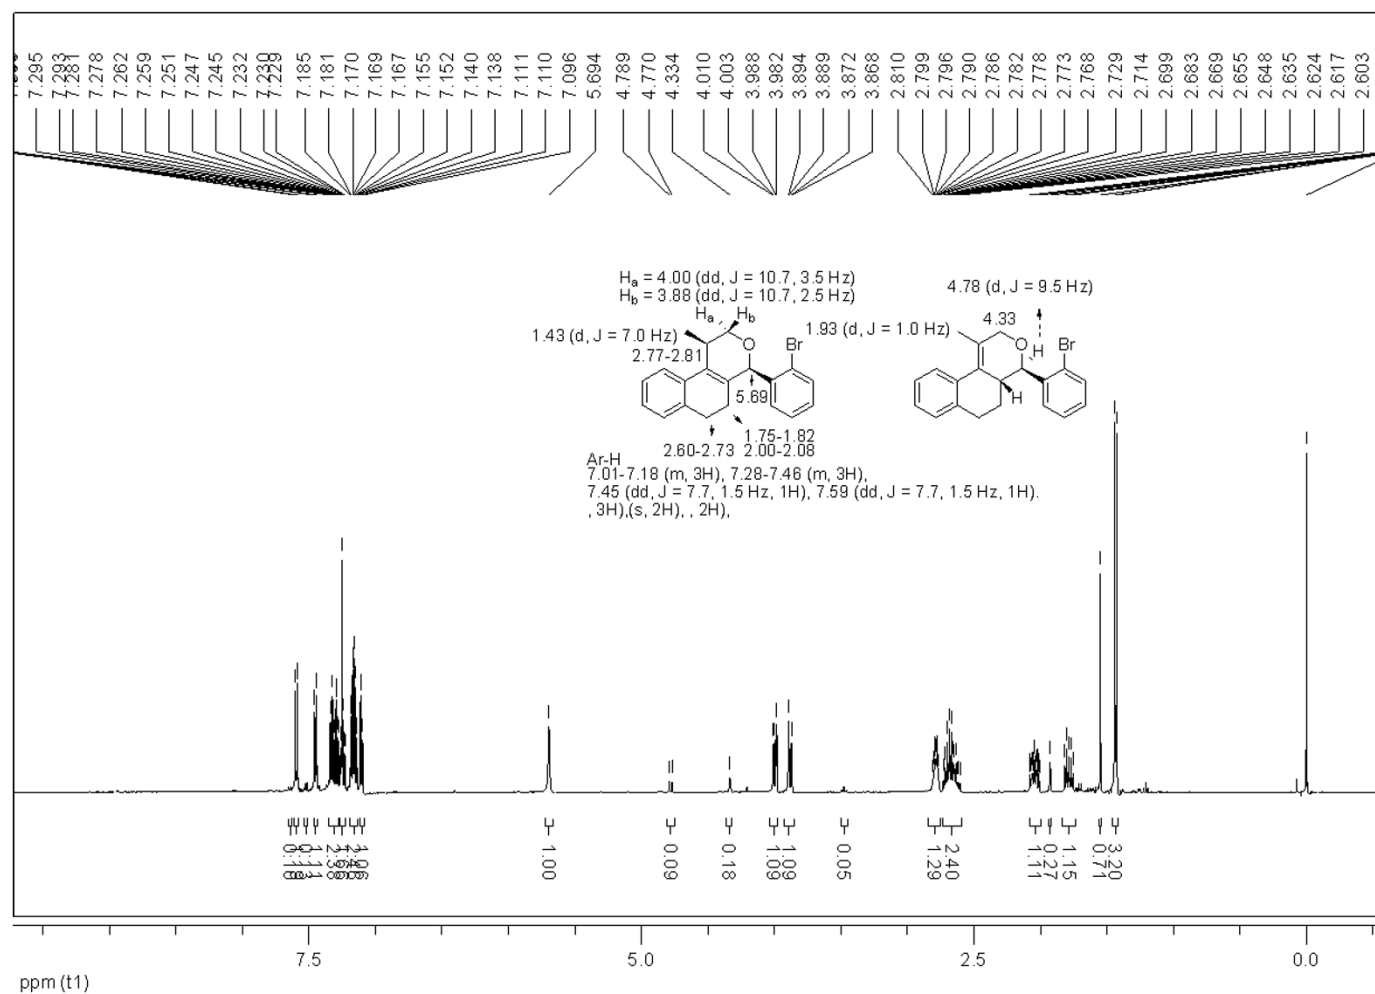

$^1\text{H}$ -NMR of compounds *cis*-**71** and **121** (500 MHz,  $\text{CDCl}_3$ )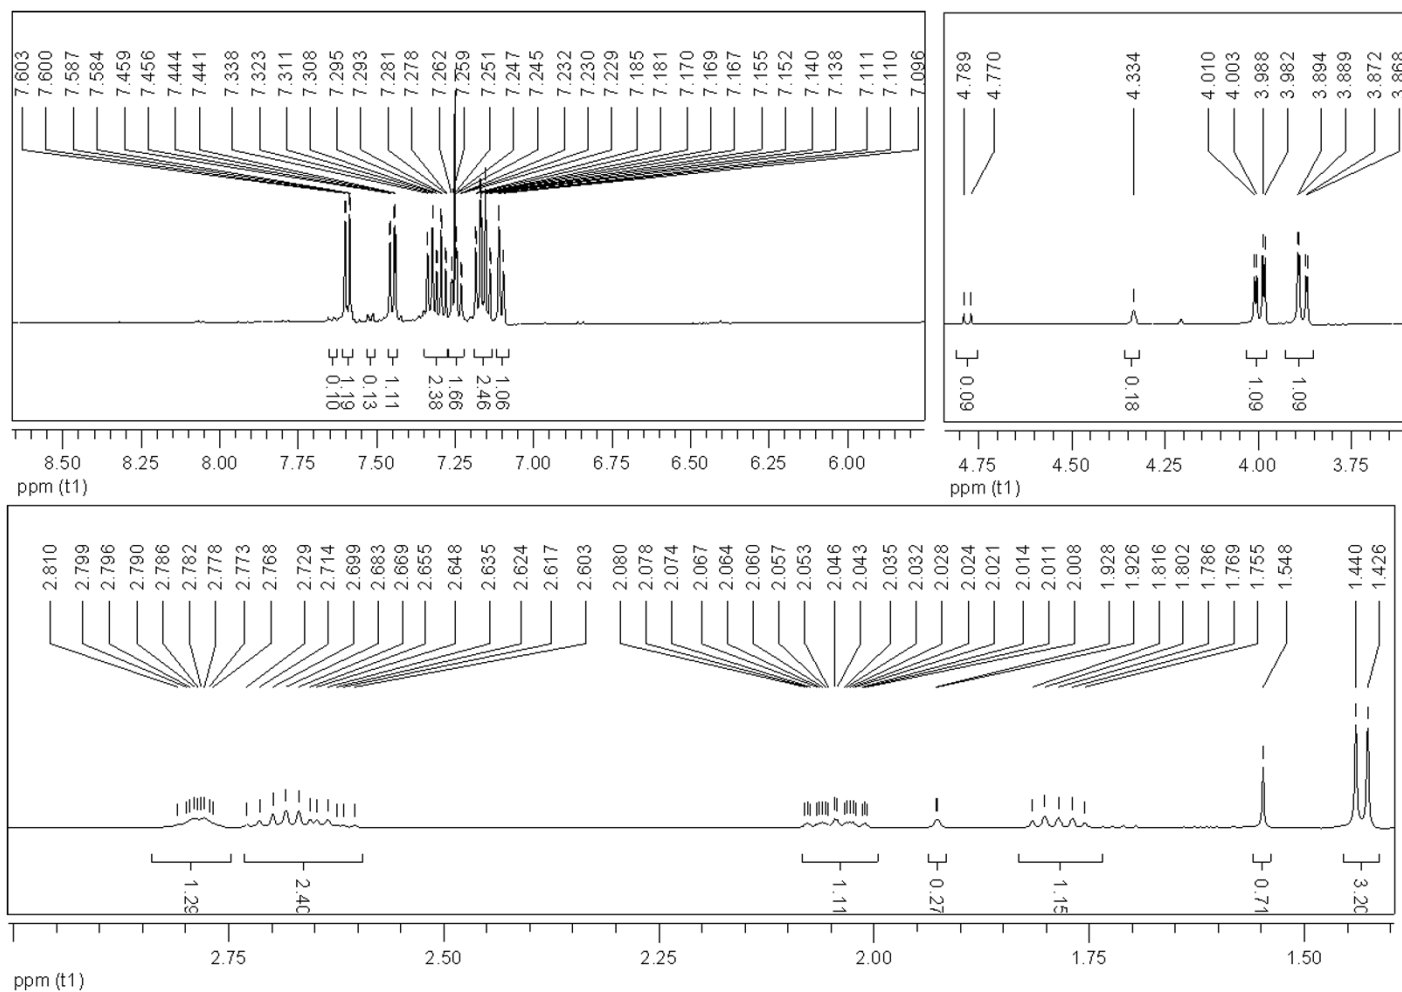

$^{13}\text{C}$ -NMR of compounds *cis*-**71** and **121** (75 MHz,  $\text{CDCl}_3$ )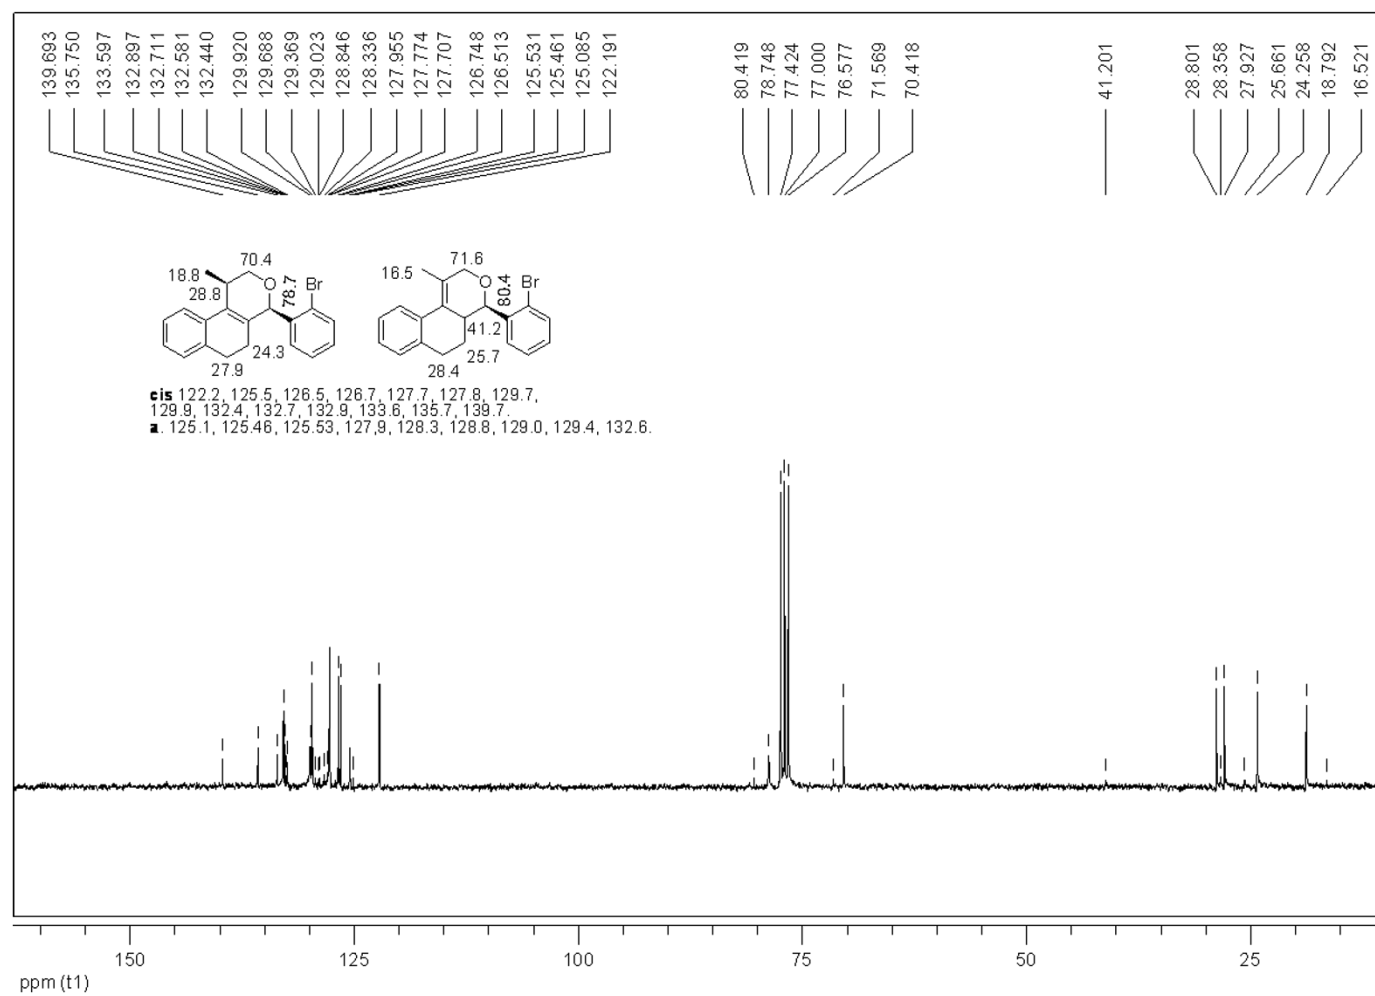

$^{13}\text{C}$ -NMR of compounds *cis*-**7l** and **12l** (75 MHz,  $\text{CDCl}_3$ )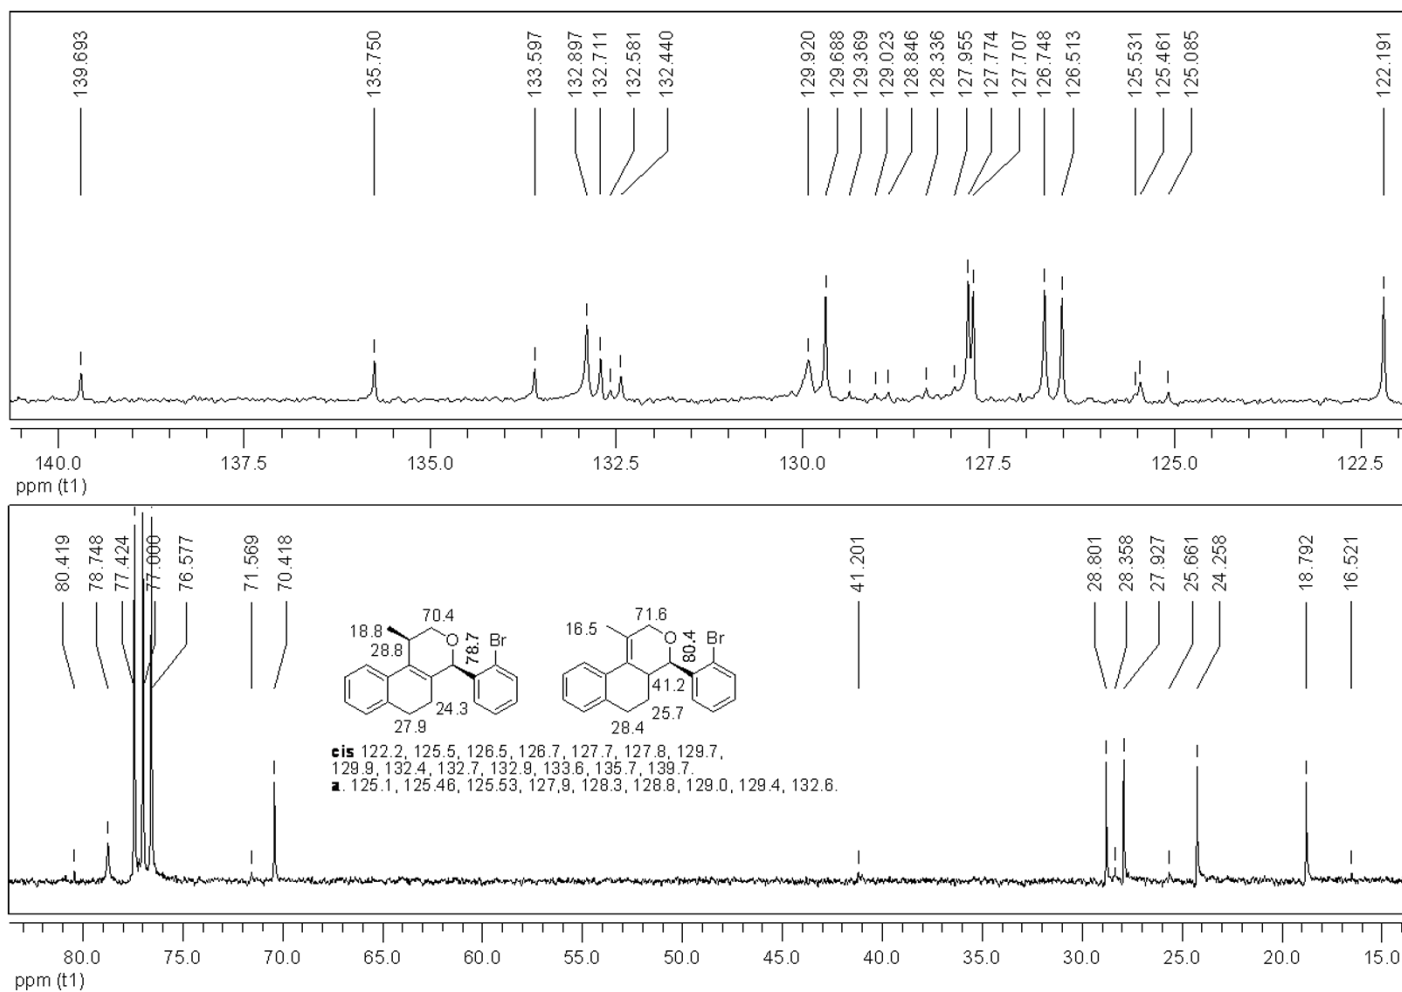

2D NOESY NMR of compound *cis*-71 (500 MHz, CDCl<sub>3</sub>)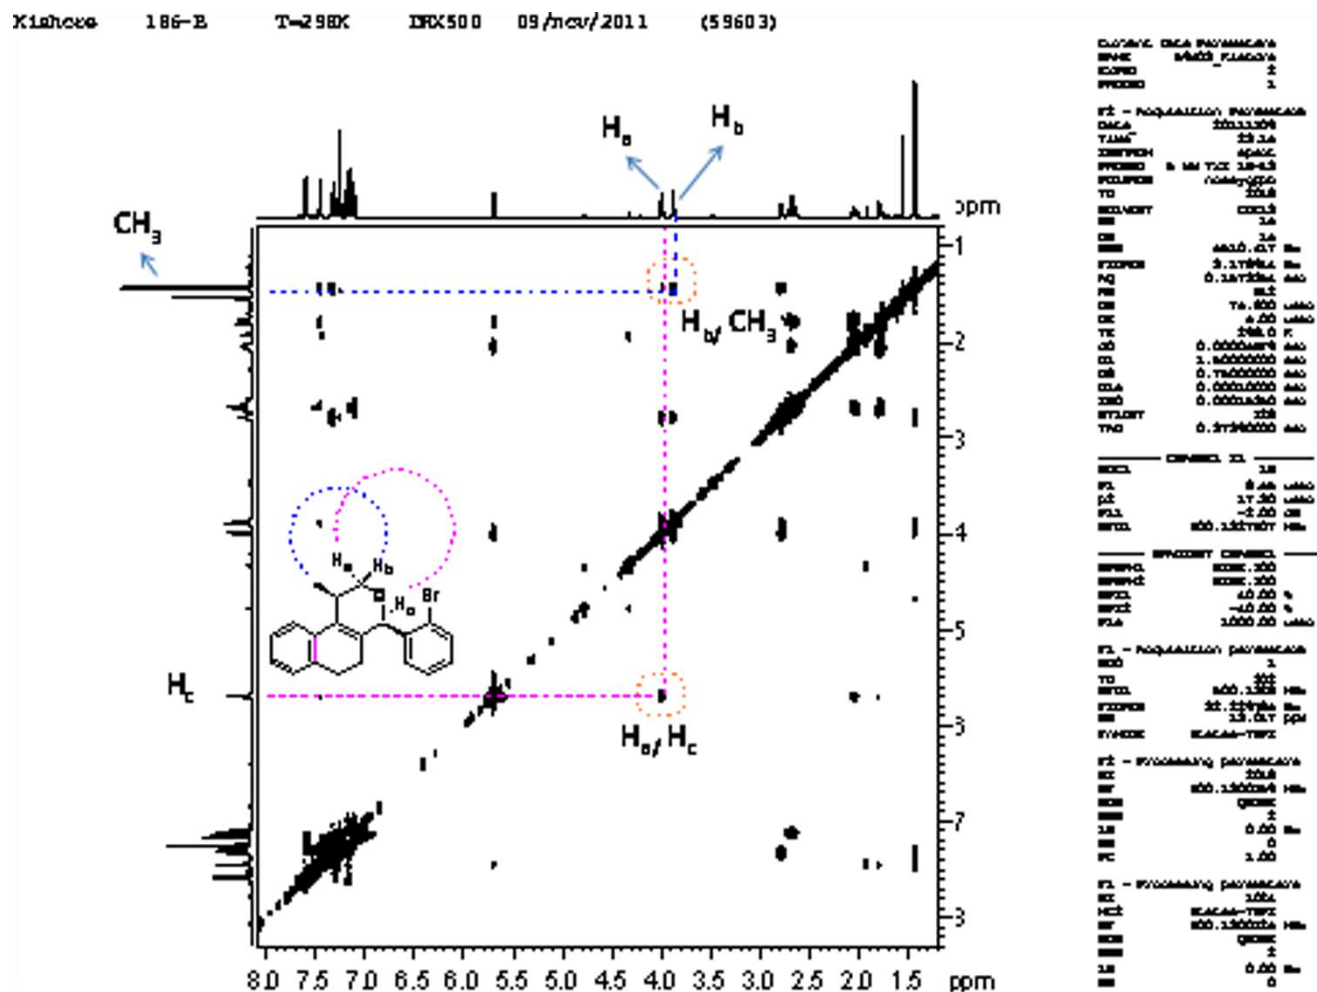

<sup>1</sup>H-NMR of compound *cis*-**7n** (500 MHz, CDCl<sub>3</sub>)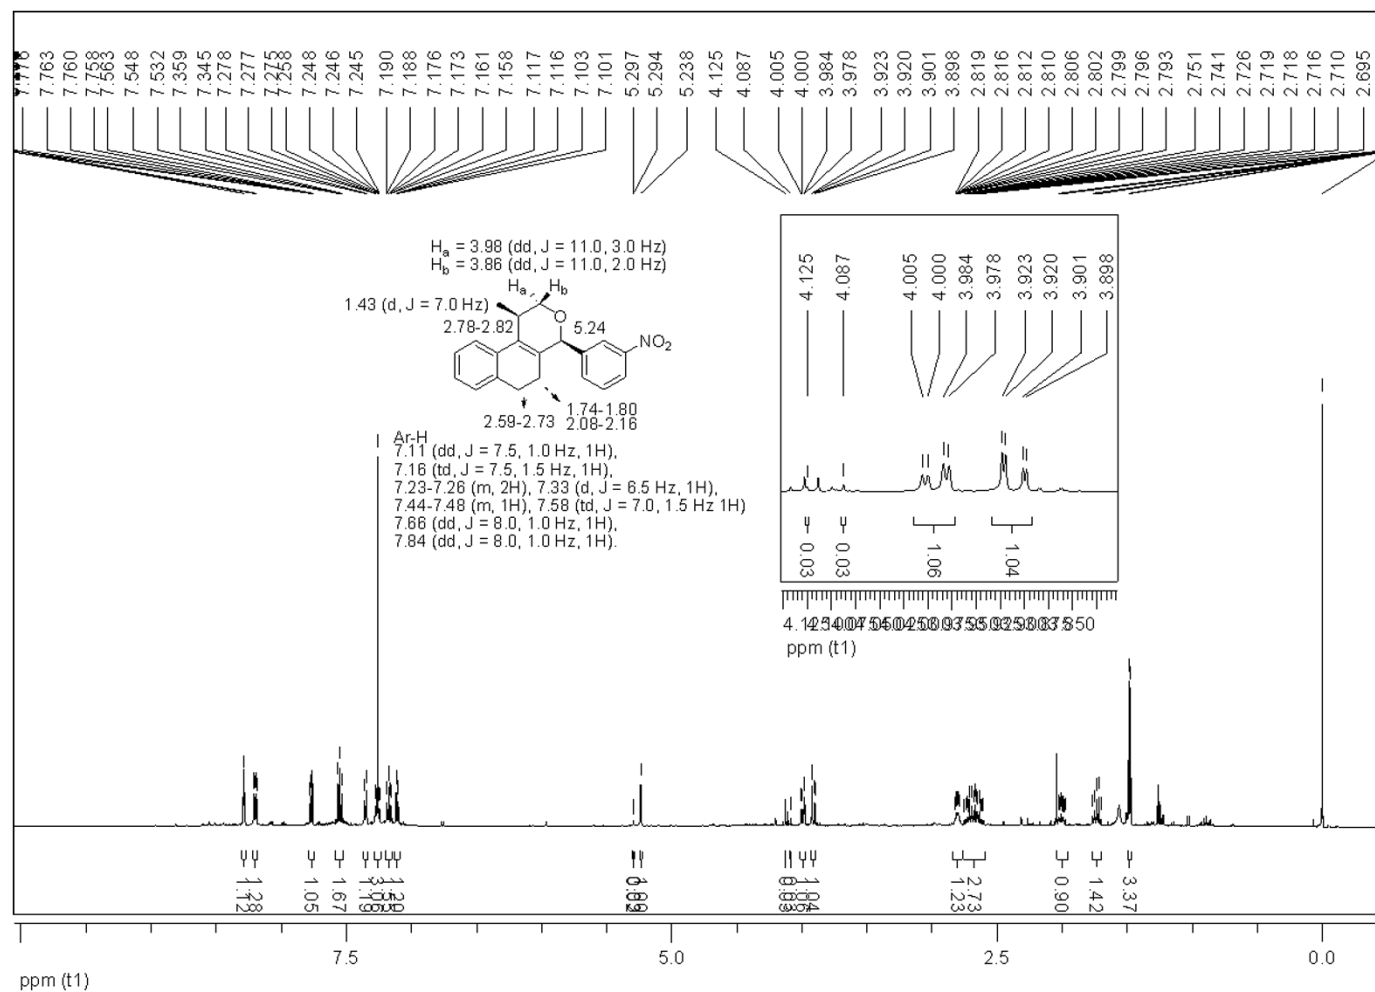

<sup>1</sup>H-NMR of compound *cis*-**7n** (500 MHz, CDCl<sub>3</sub>)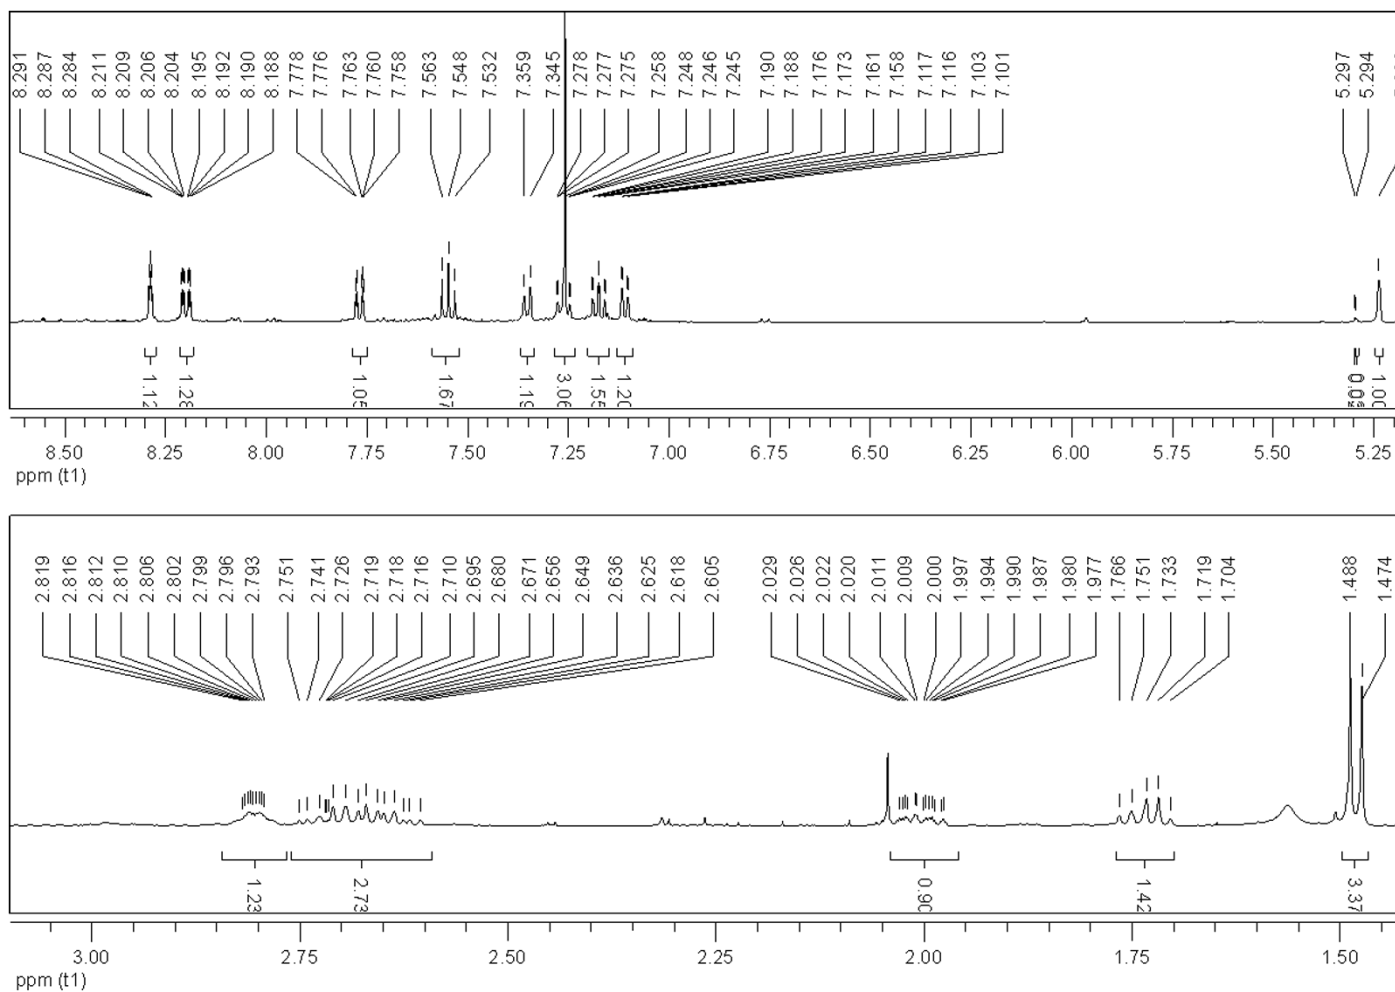

$^{13}\text{C}$ -NMR of compound *cis*-**7n** (50 MHz,  $\text{CDCl}_3$ )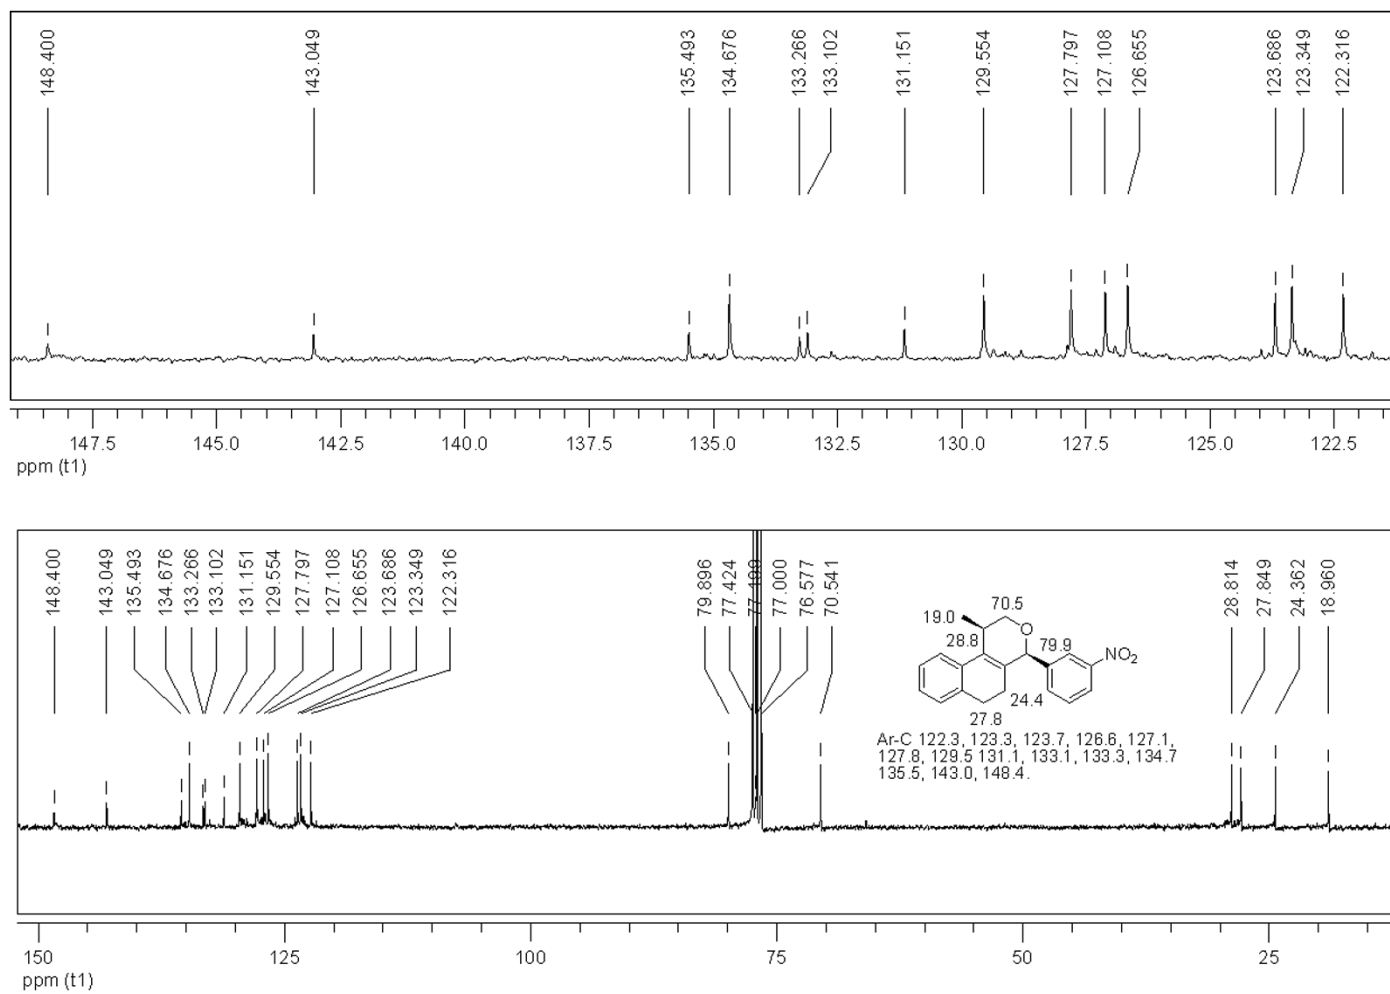

**2D NOESY NMR of compound *cis*-7n (500 MHz, CDCl<sub>3</sub>)**

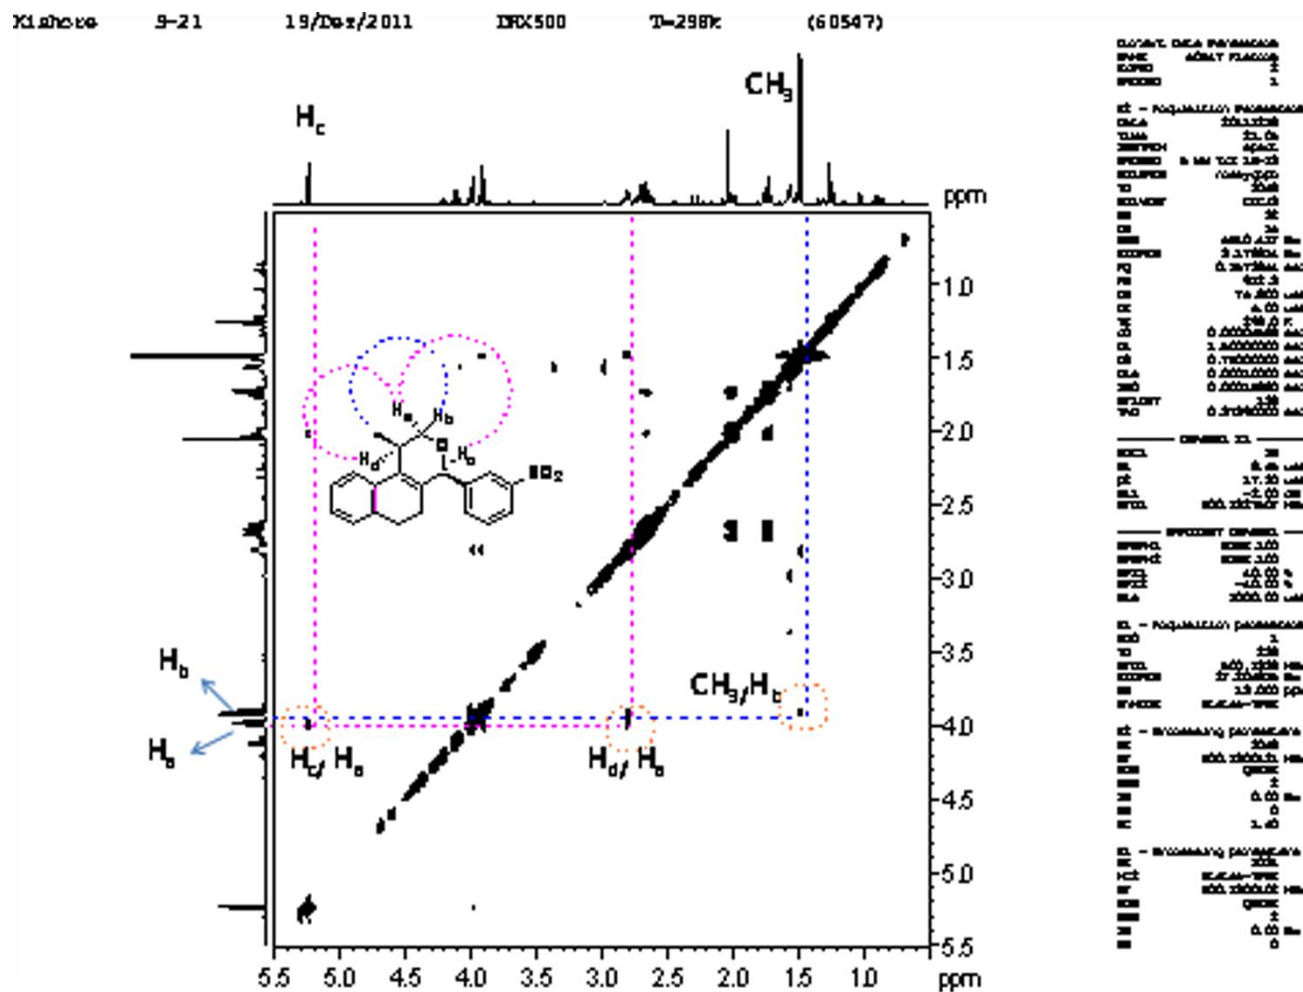

<sup>1</sup>H-NMR of compounds *cis*-**7o** and **12o** (500 MHz, CDCl<sub>3</sub>)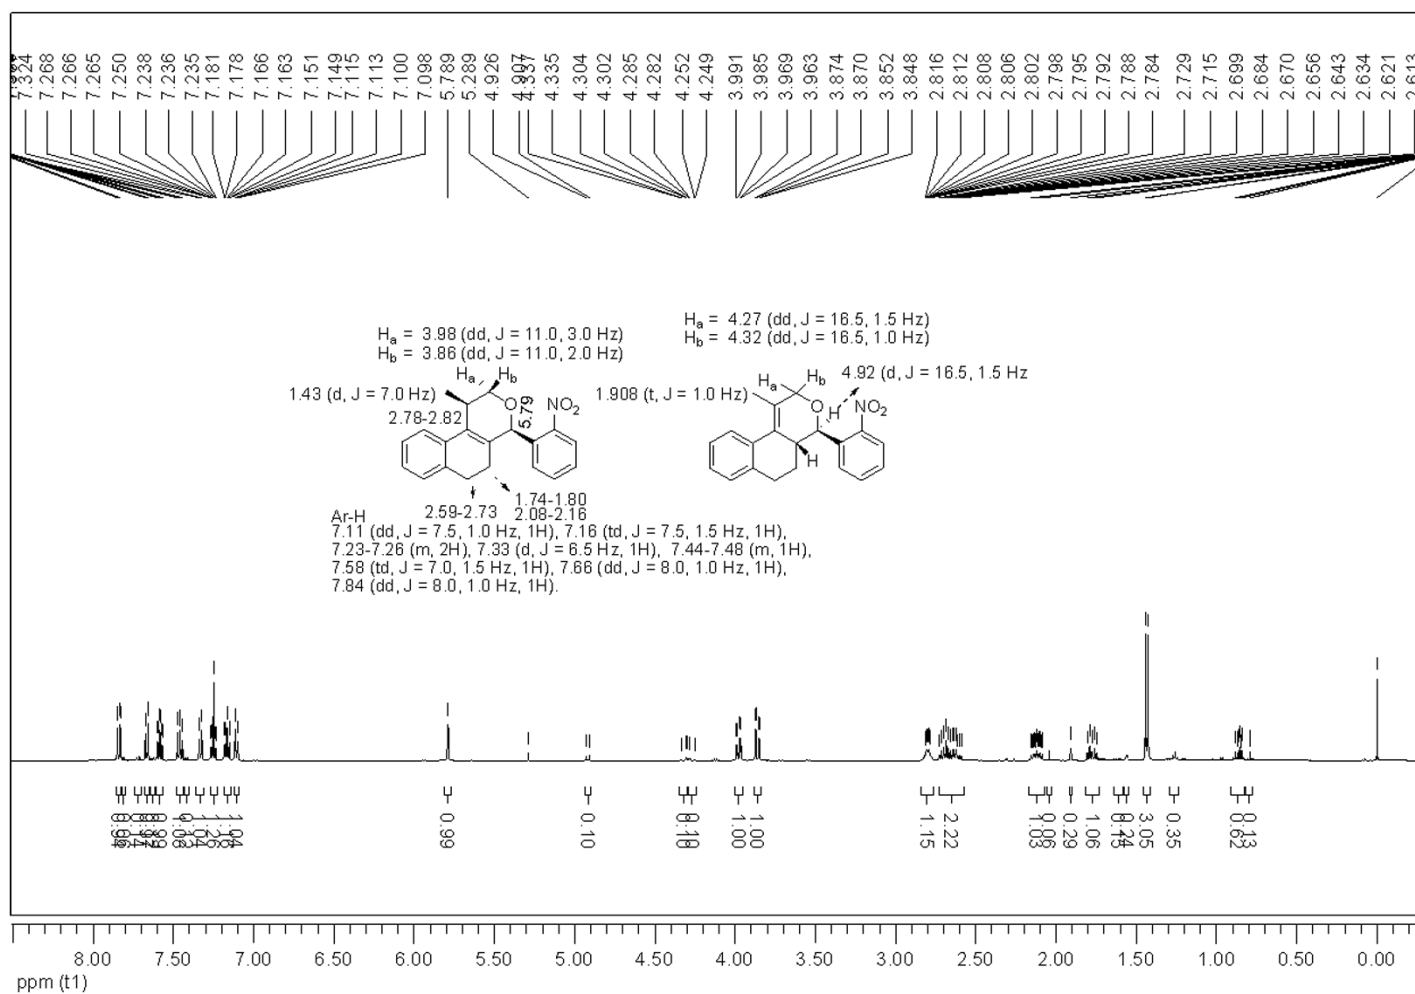

<sup>1</sup>H-NMR of compounds *cis*-**7o** and **12o** (500 MHz, CDCl<sub>3</sub>)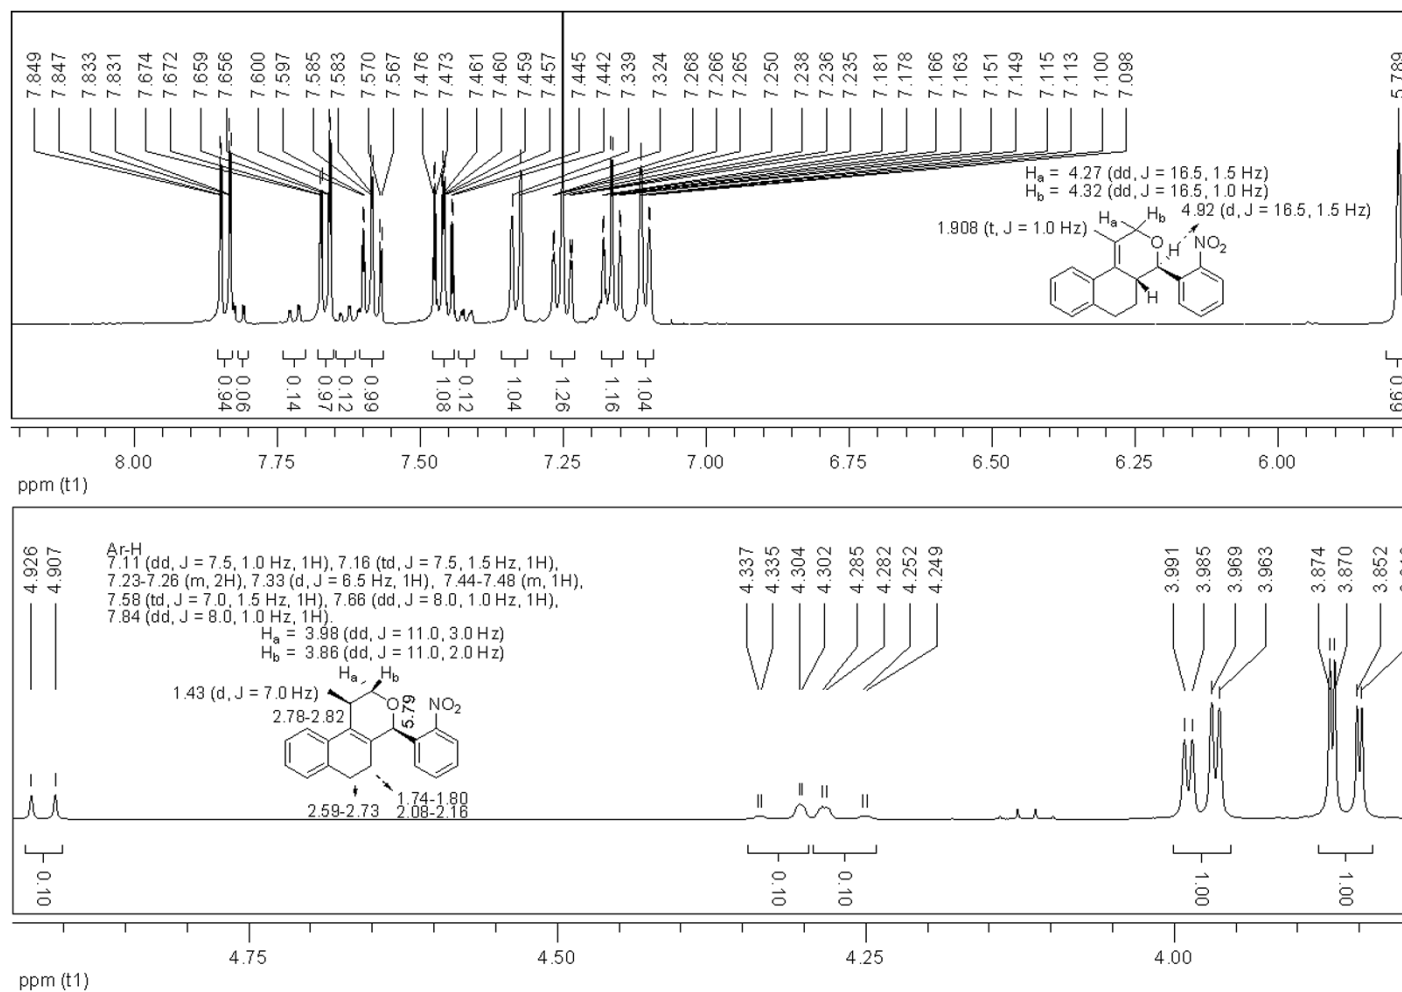

<sup>1</sup>H-NMR of compounds *cis*-**7o** and **12o** (500 MHz, CDCl<sub>3</sub>)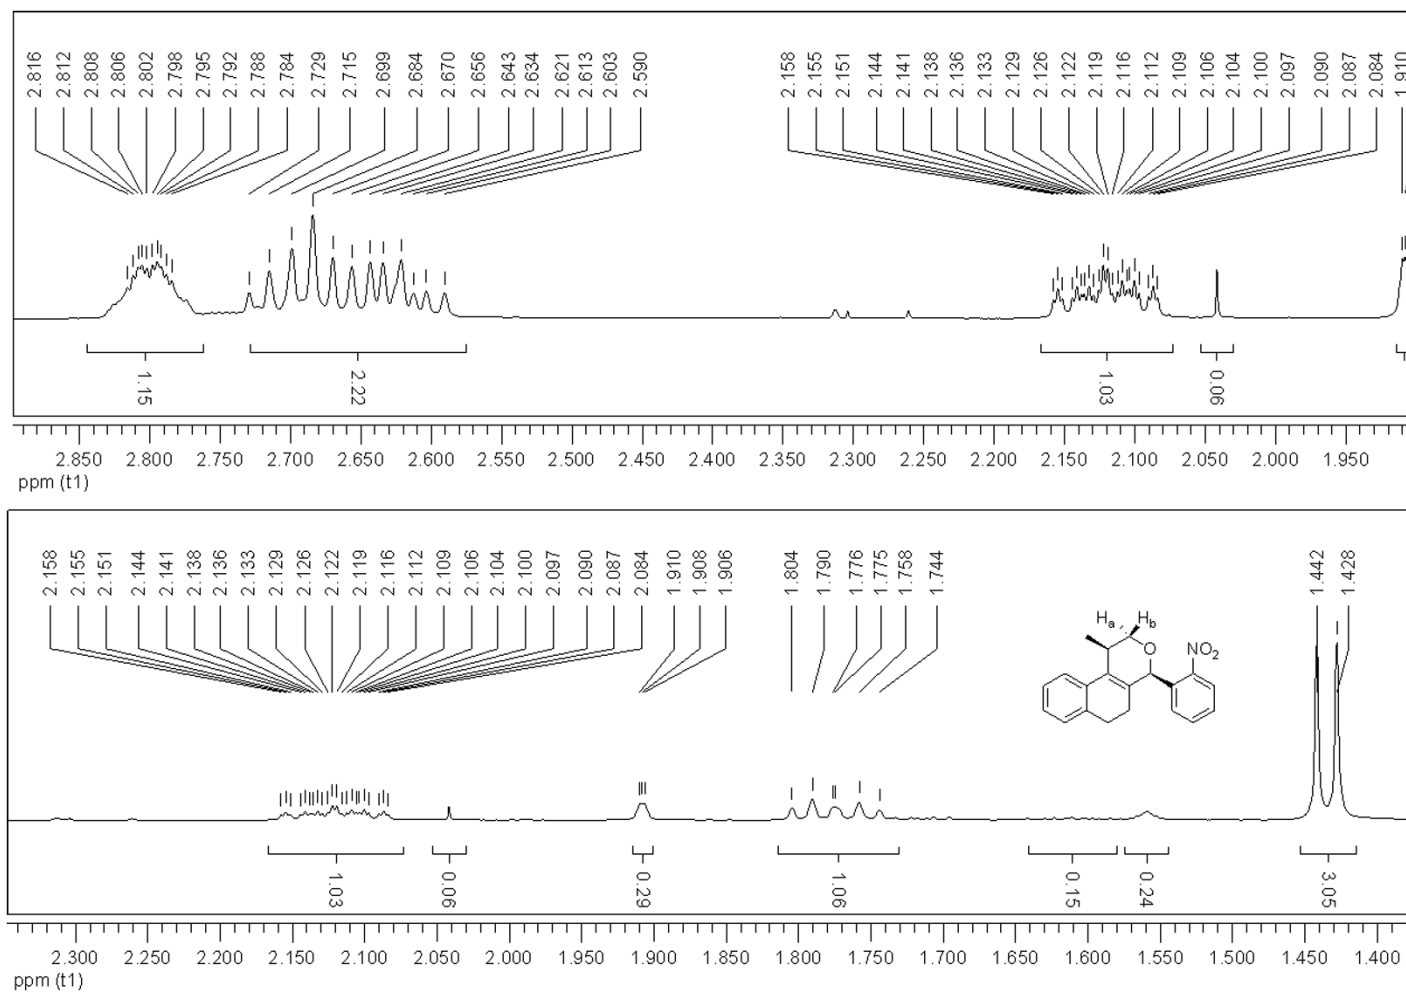

$^{13}\text{C}$ -NMR of compounds *cis*-**7o** and **12o** (75 MHz,  $\text{CDCl}_3$ )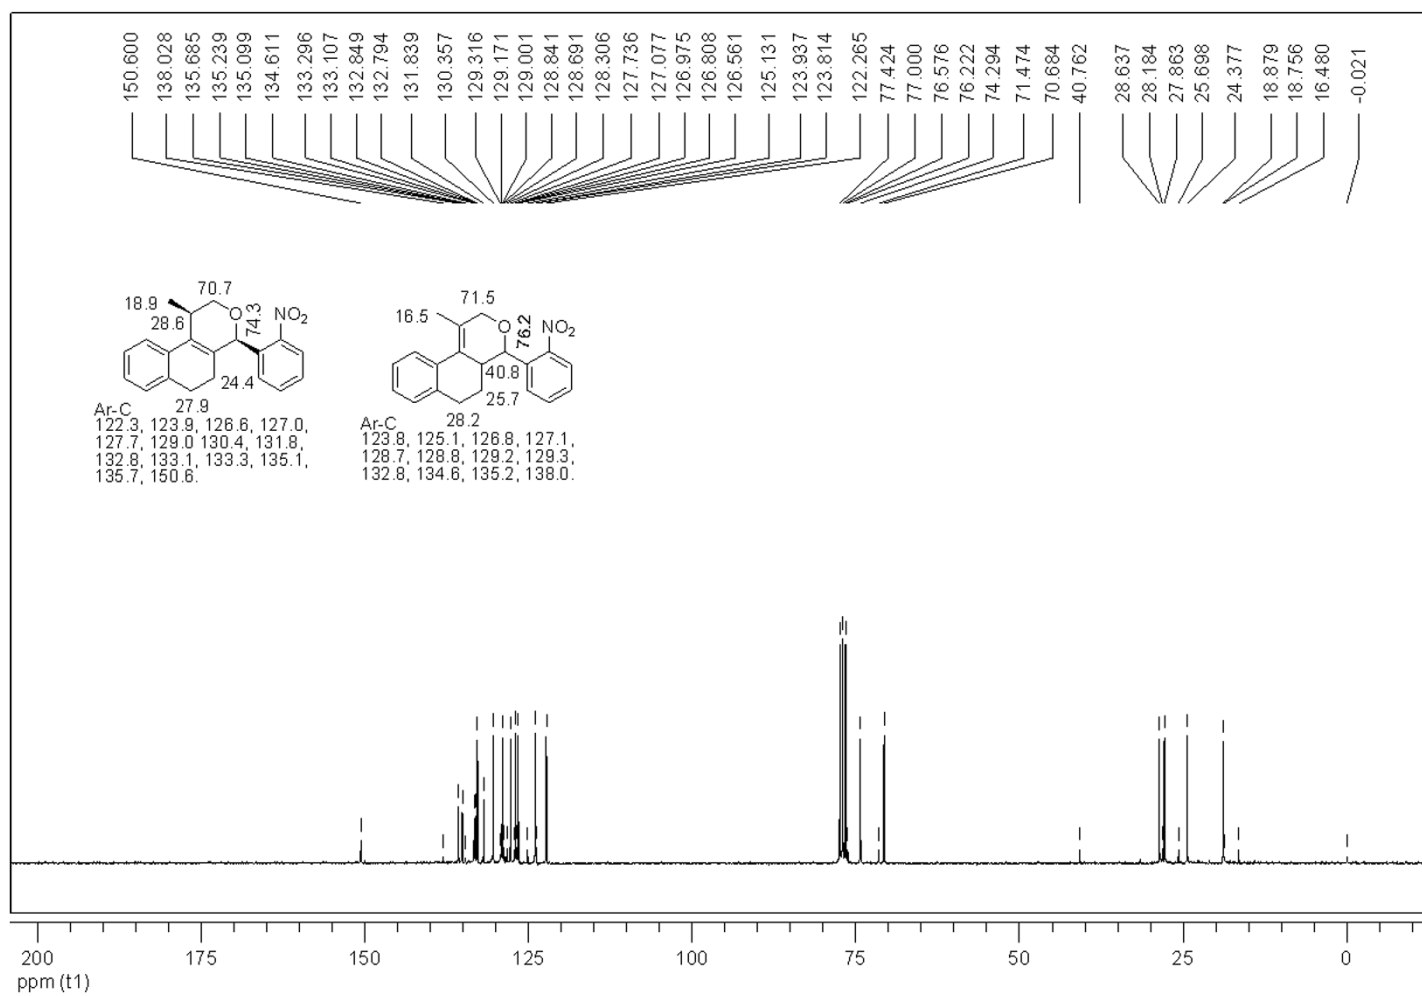

$^{13}\text{C}$ -NMR of compounds *cis*-**7o** and **12o** (75 MHz,  $\text{CDCl}_3$ )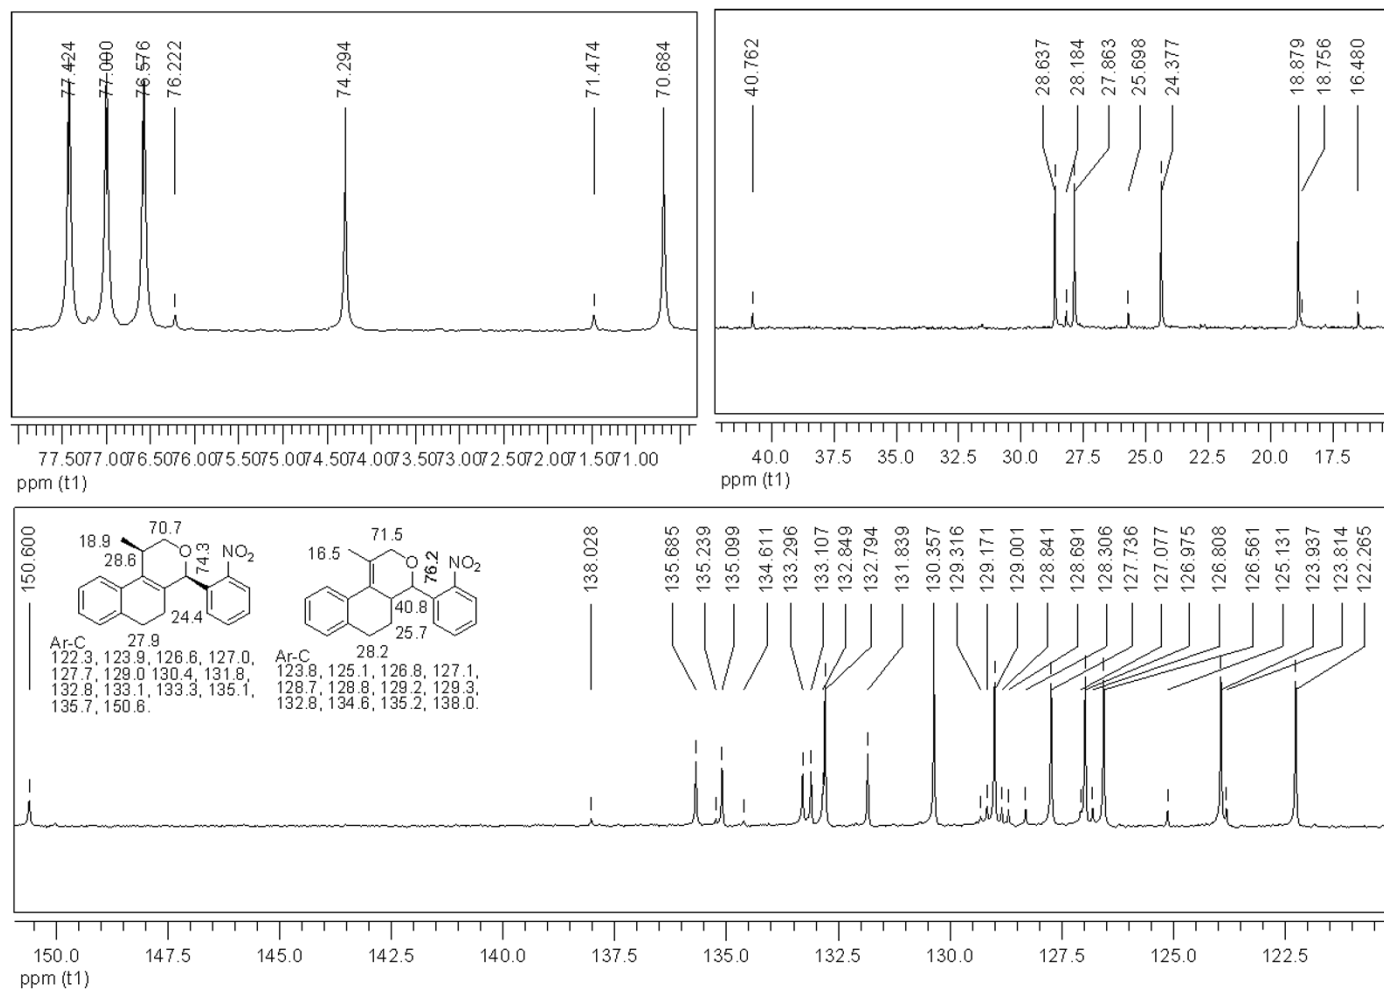

Kinross 187-E T-298X DFX500 09/may/2011 (59604)

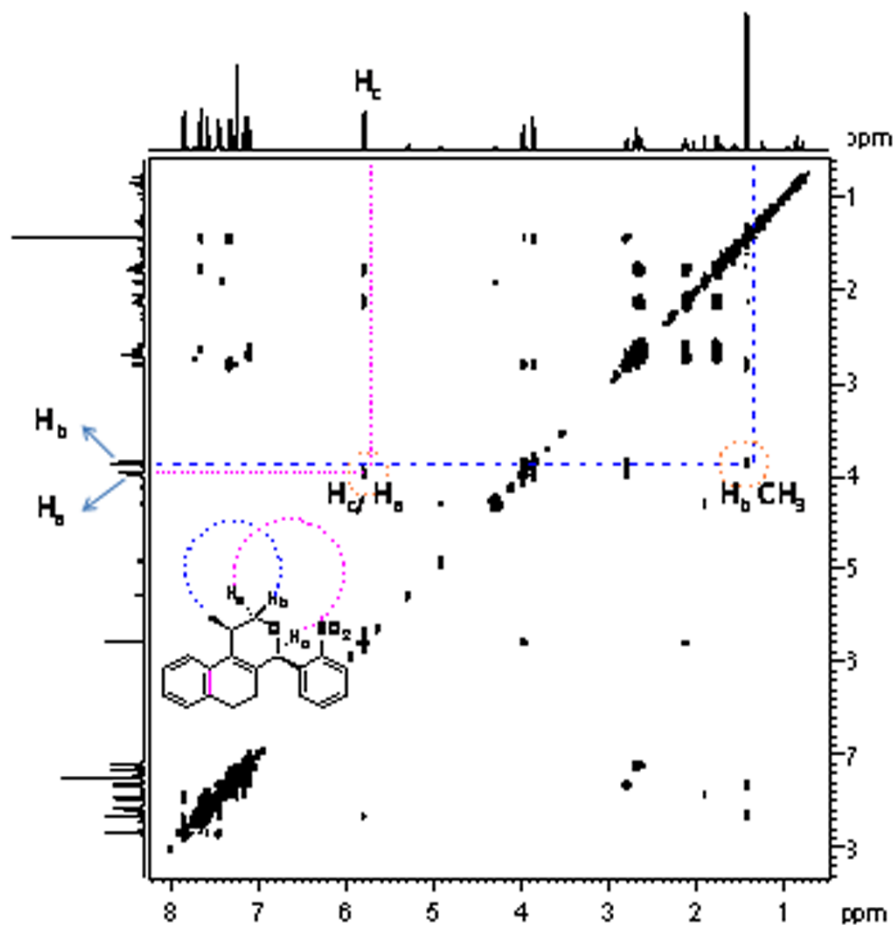[illegible]

<sup>1</sup>H-NMR of compound *cis*-7q (200 MHz, CDCl<sub>3</sub>)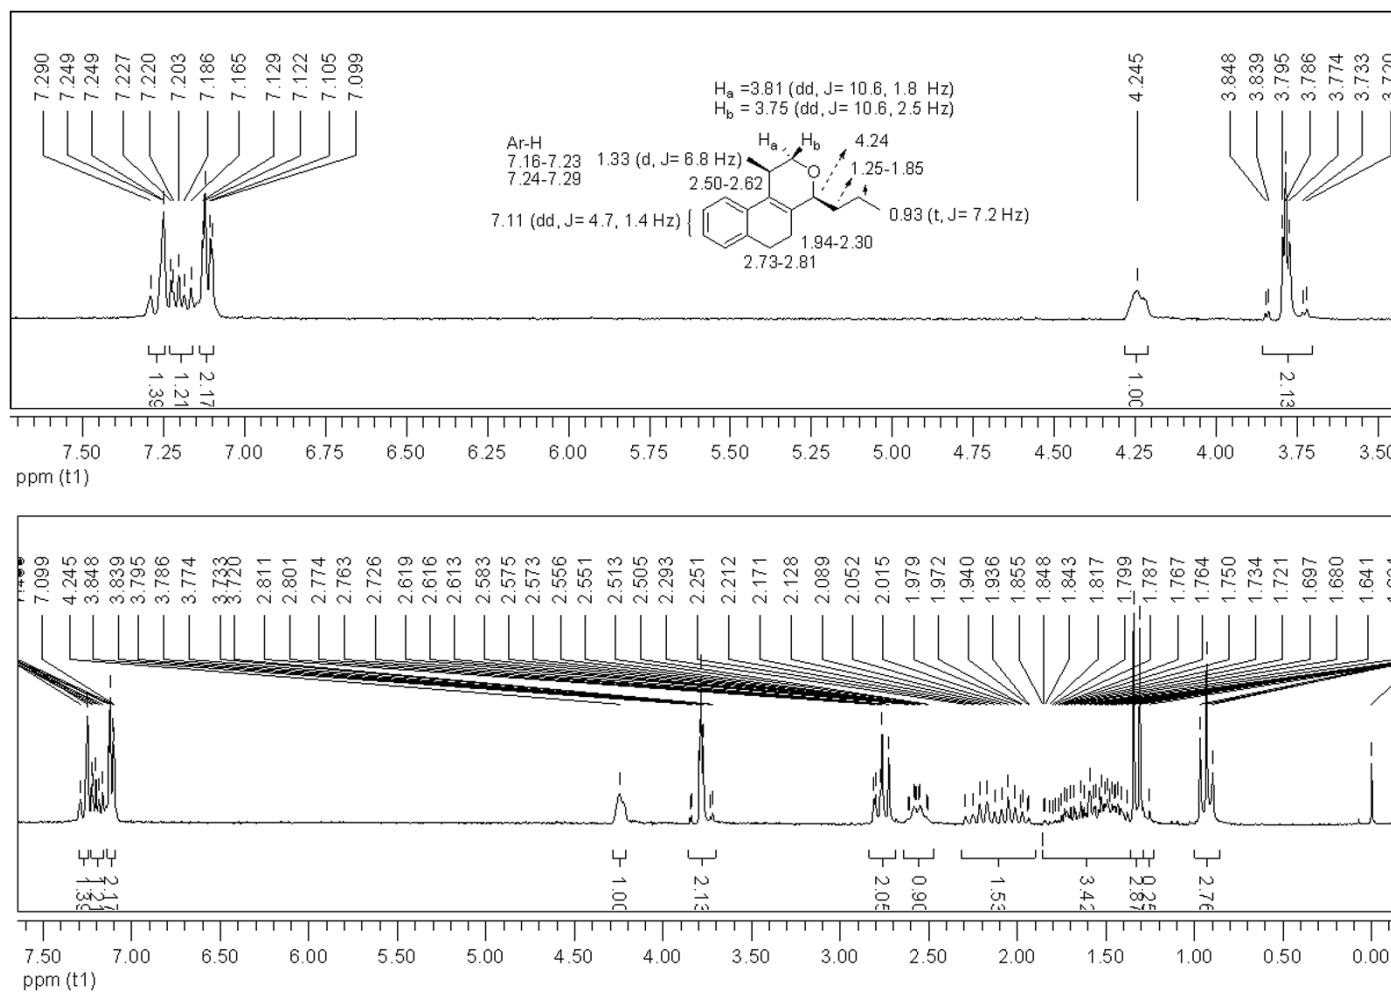

The figure displays two  $^1\text{H}$  NMR spectra of compound **1**. The top spectrum is the  $^1\text{H}$  NMR in  $\text{CDCl}_3$ , and the bottom spectrum is the  $^1\text{H}$  NMR in  $\text{DMSO}-d_6$ . Both spectra include chemical shift values (ppm), integration values, and a chemical structure of compound **1** with proton assignments.

**Top Spectrum ( $^1\text{H}$  NMR in  $\text{CDCl}_3$ ):**

- Chemical shift range: 1.936 to 2.811 ppm.
- Integration values: 2.06, 0.90, 1.53.
- Chemical structure of compound **1** is shown with proton assignments:  $\text{H}_a$ ,  $\text{H}_b$ , and  $\text{H}_c$ .

**Bottom Spectrum ( $^1\text{H}$  NMR in  $\text{DMSO}-d_6$ ):**

- Chemical shift range: 0.000 to 1.855 ppm.
- Integration values: 1.53, 3.42, 2.87, 0.25, 2.76.
- Chemical structure of compound **1** is shown with proton assignments:  $\text{H}_a$ ,  $\text{H}_b$ , and  $\text{H}_c$ .

$^{13}\text{C}$ -NMR of compound *cis*-7q (50 MHz,  $\text{CDCl}_3$ )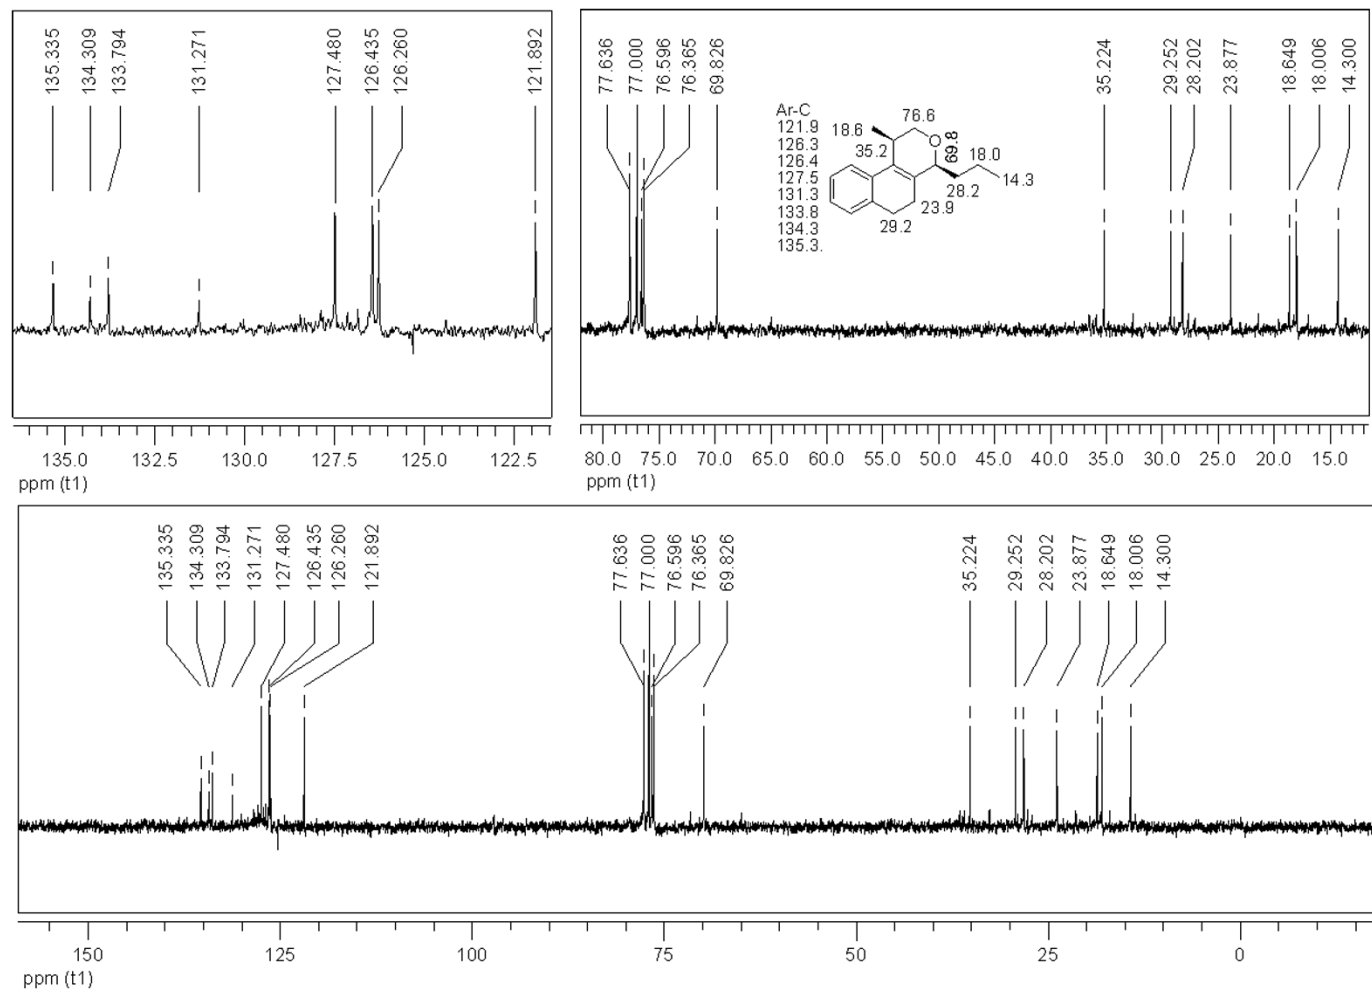

$^1\text{H}$ -NMR of compound *cis*-**7r** and *trans*-**7r** (300 MHz,  $\text{CDCl}_3$ )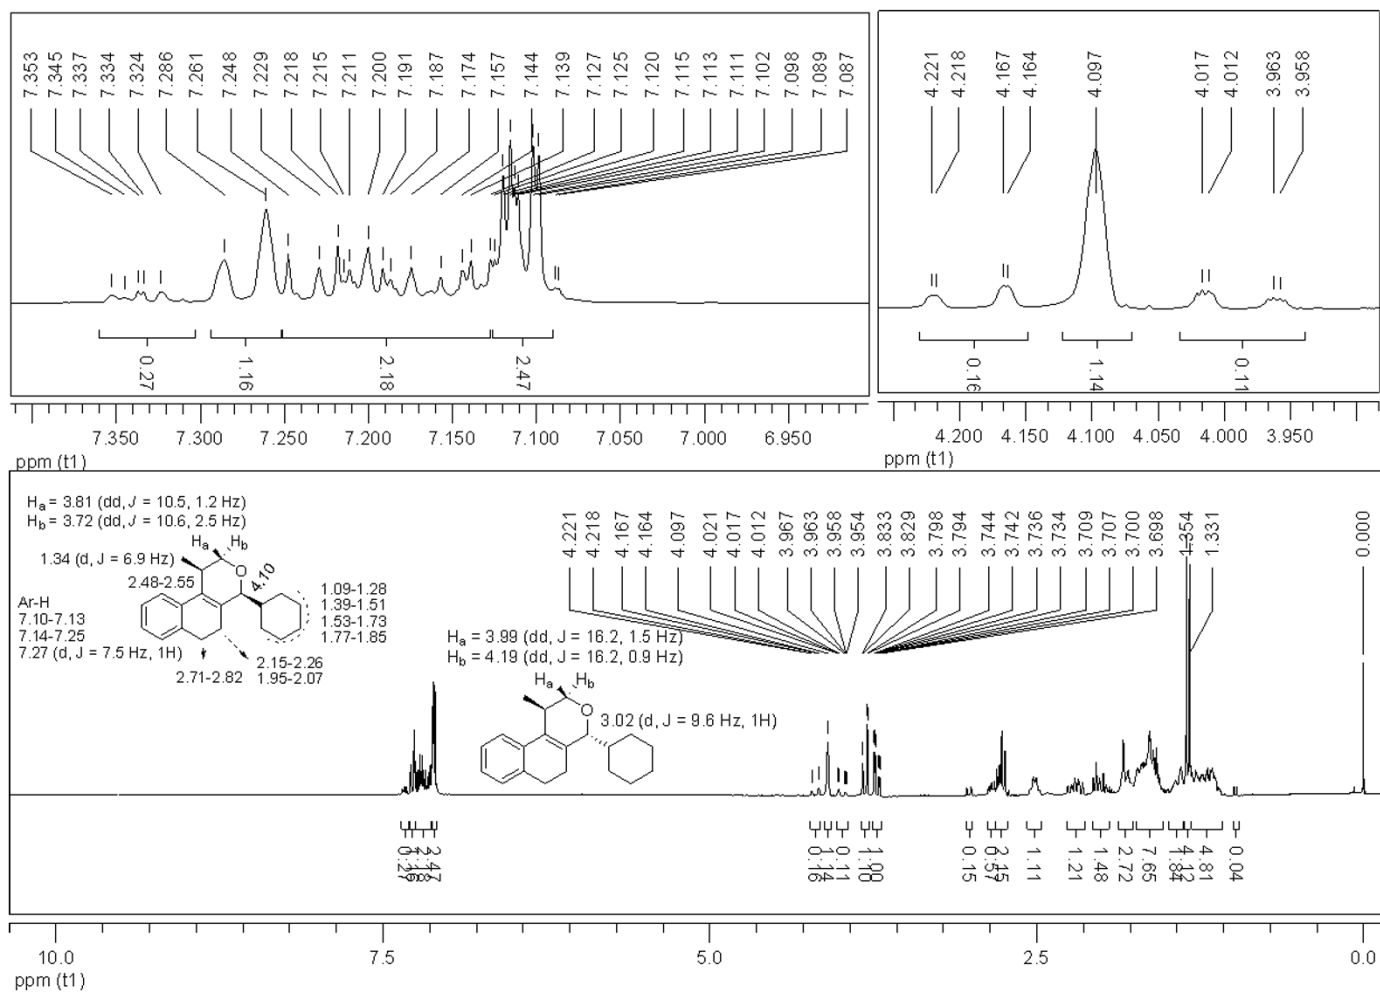

<sup>1</sup>H-NMR of compound *cis*-**7r** and *trans*-**7r** (300 MHz, CDCl<sub>3</sub>)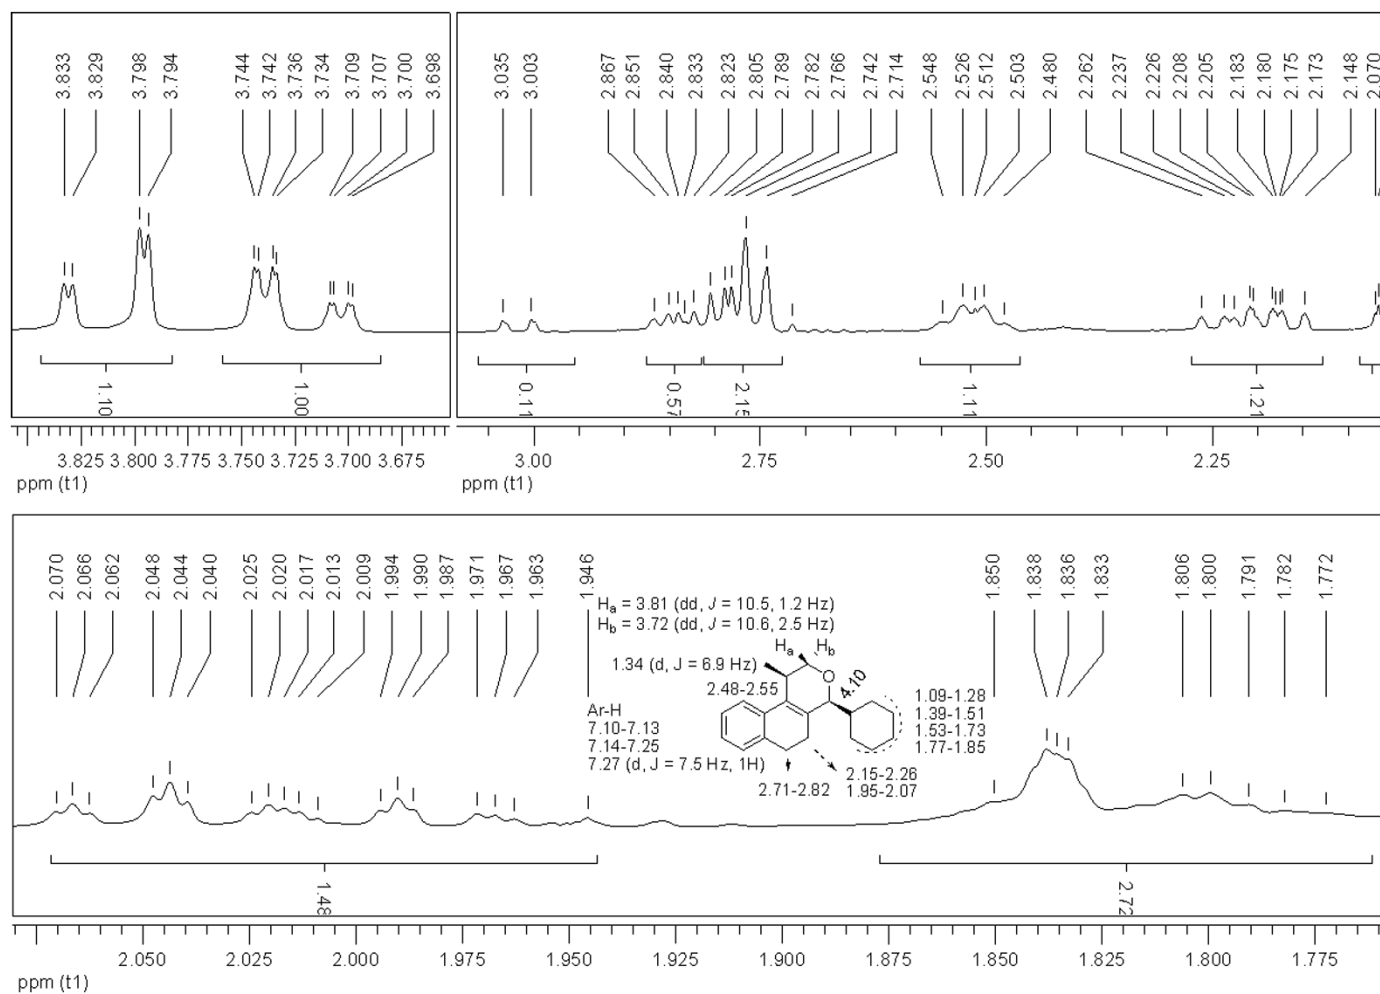

$^{13}\text{C}$ -NMR of compound *cis*-**7r** and *trans*-**7r** (75 MHz,  $\text{CDCl}_3$ )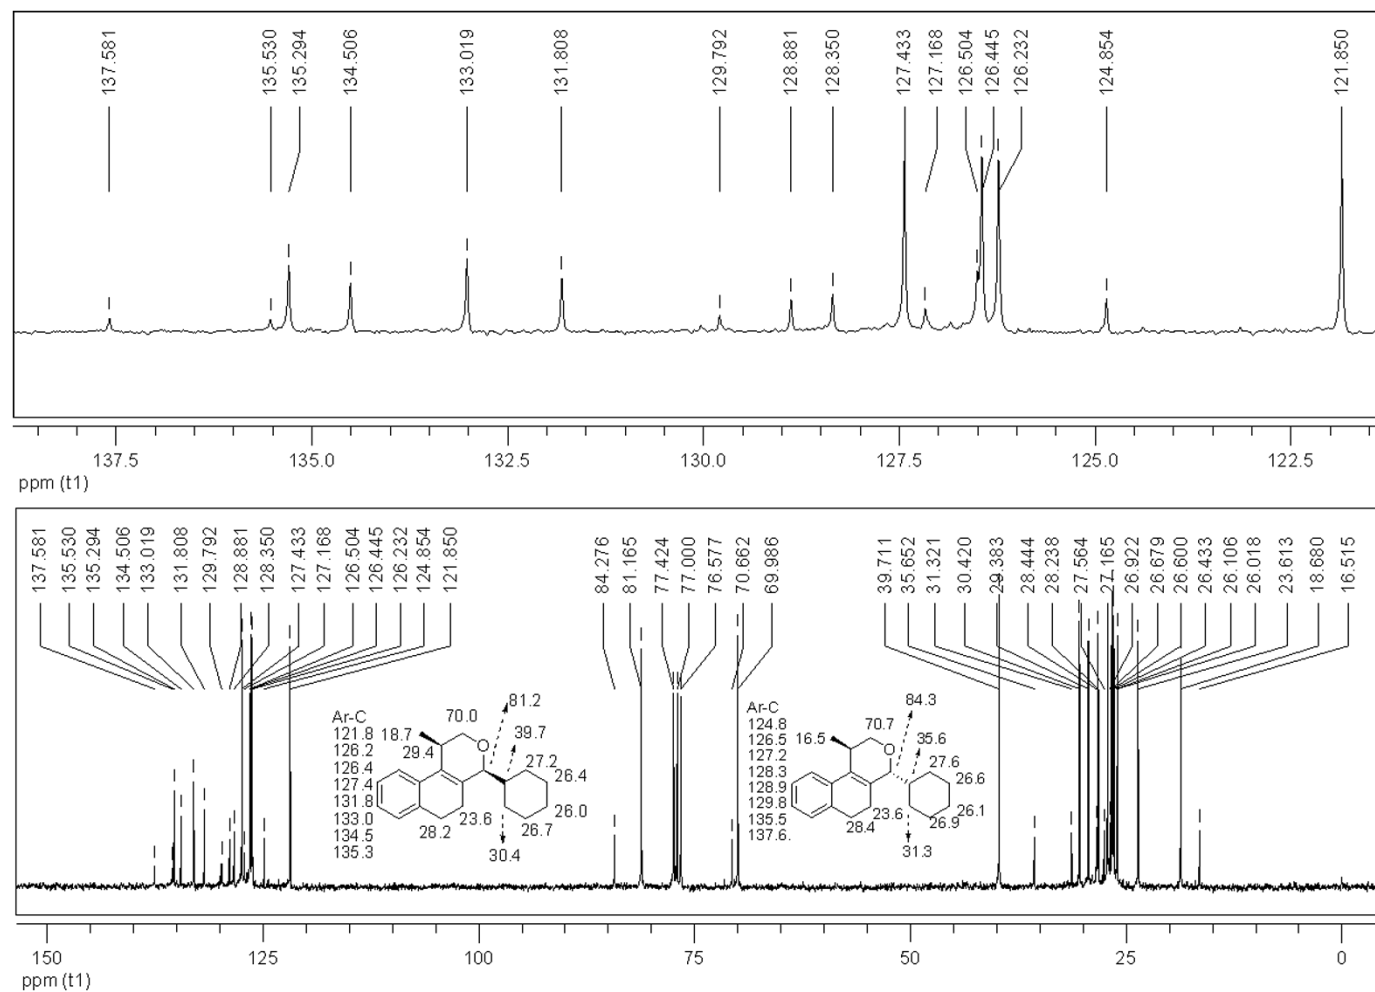

$^{13}\text{C}$ -NMR of compound *cis*-**7r** and *trans*-**7r** (75 MHz,  $\text{CDCl}_3$ )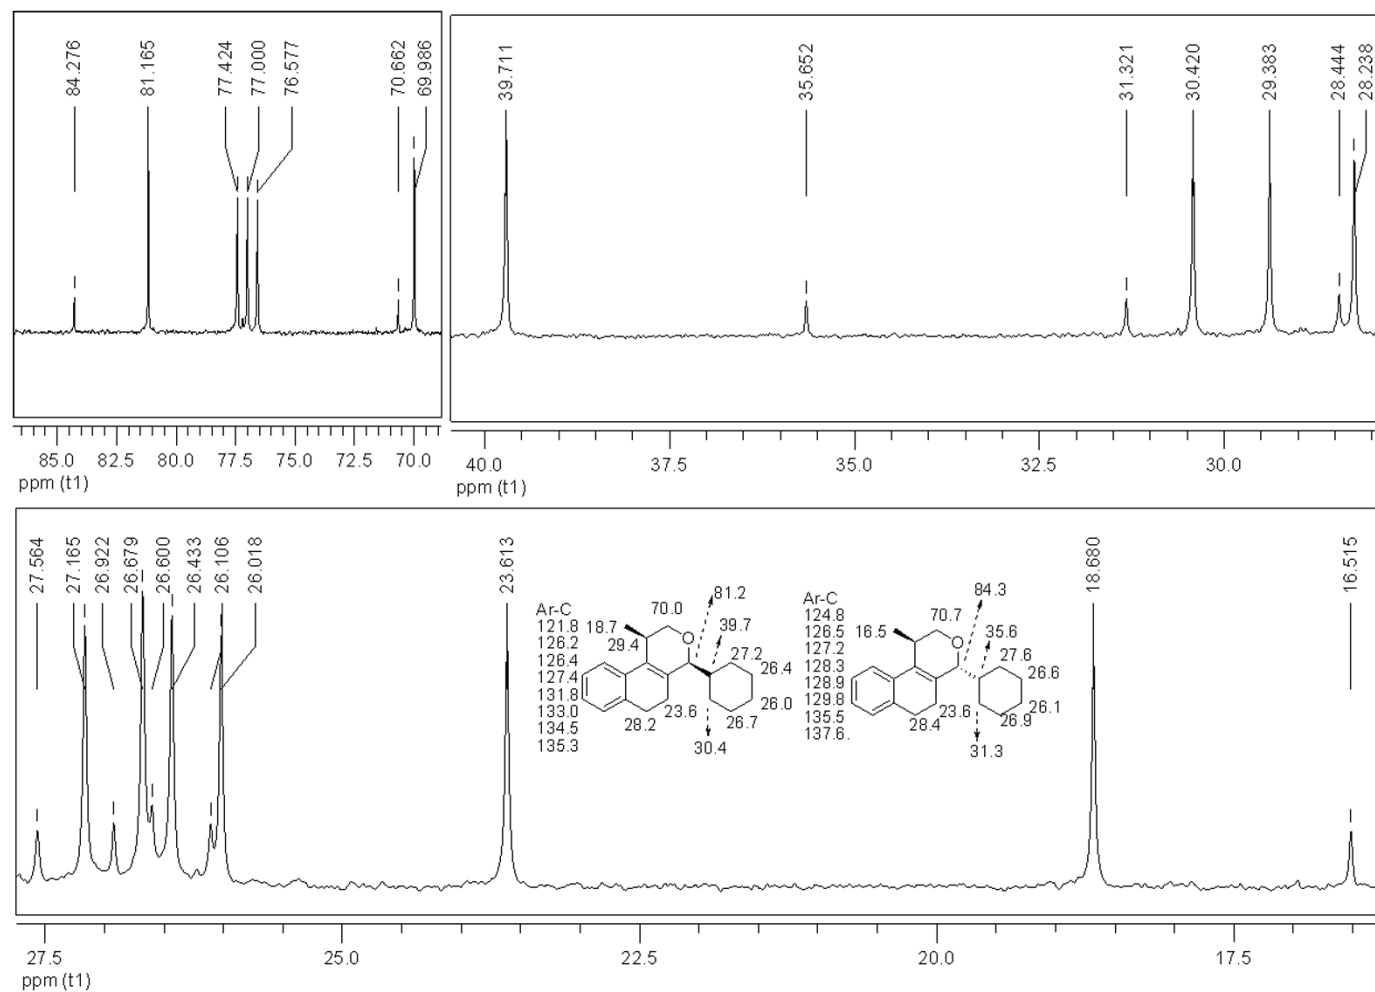

2D NOESY NMR of compound *cis*-7r and *trans*-7r (300 MHz, CDCl<sub>3</sub>)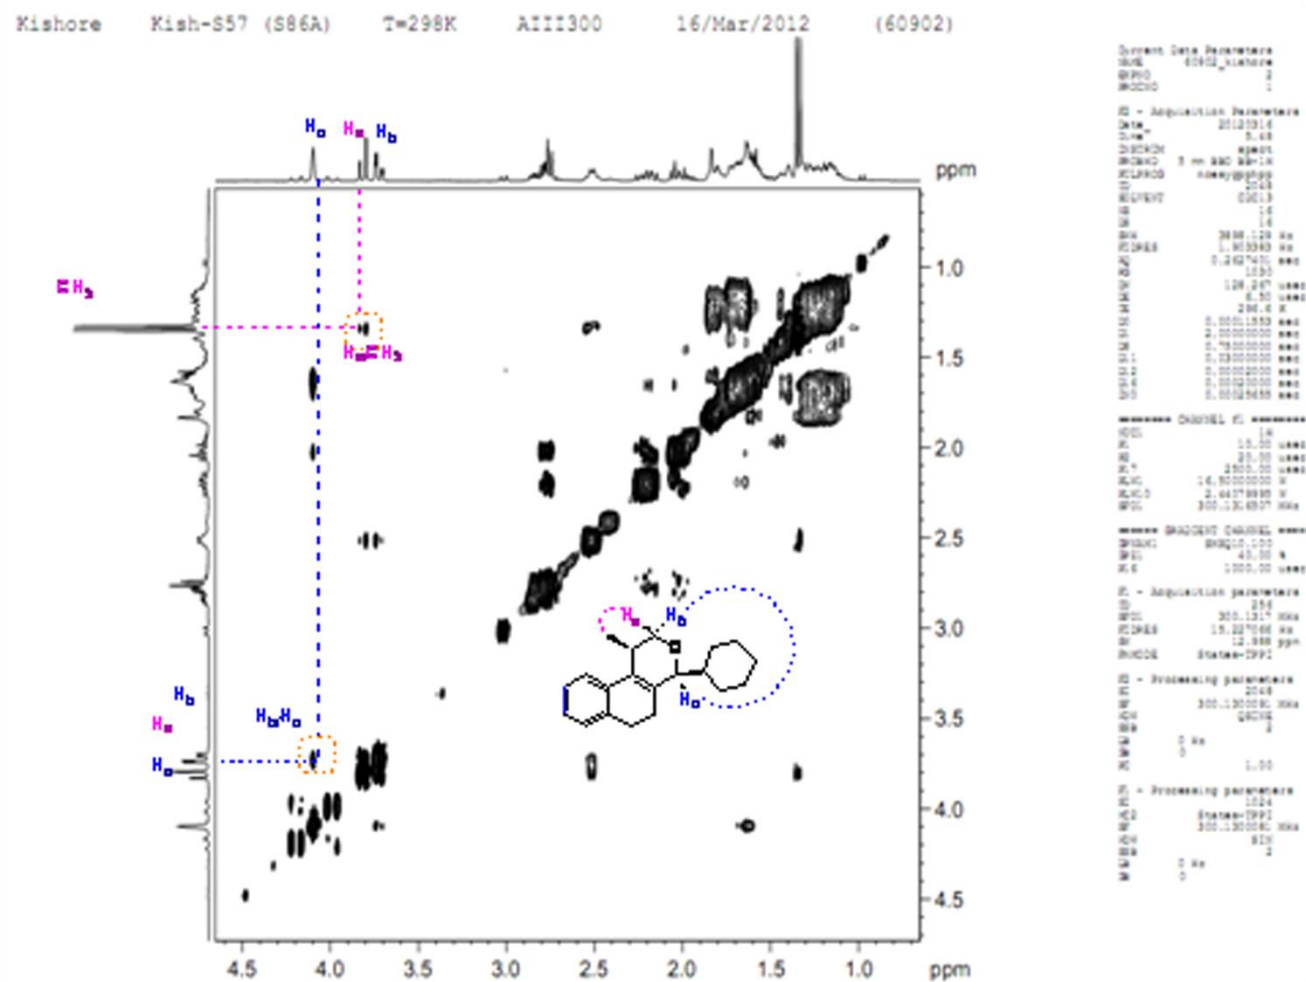

[illegible]

<sup>1</sup>H-NMR of compound *cis-7t* (300 MHz, CDCl<sub>3</sub>)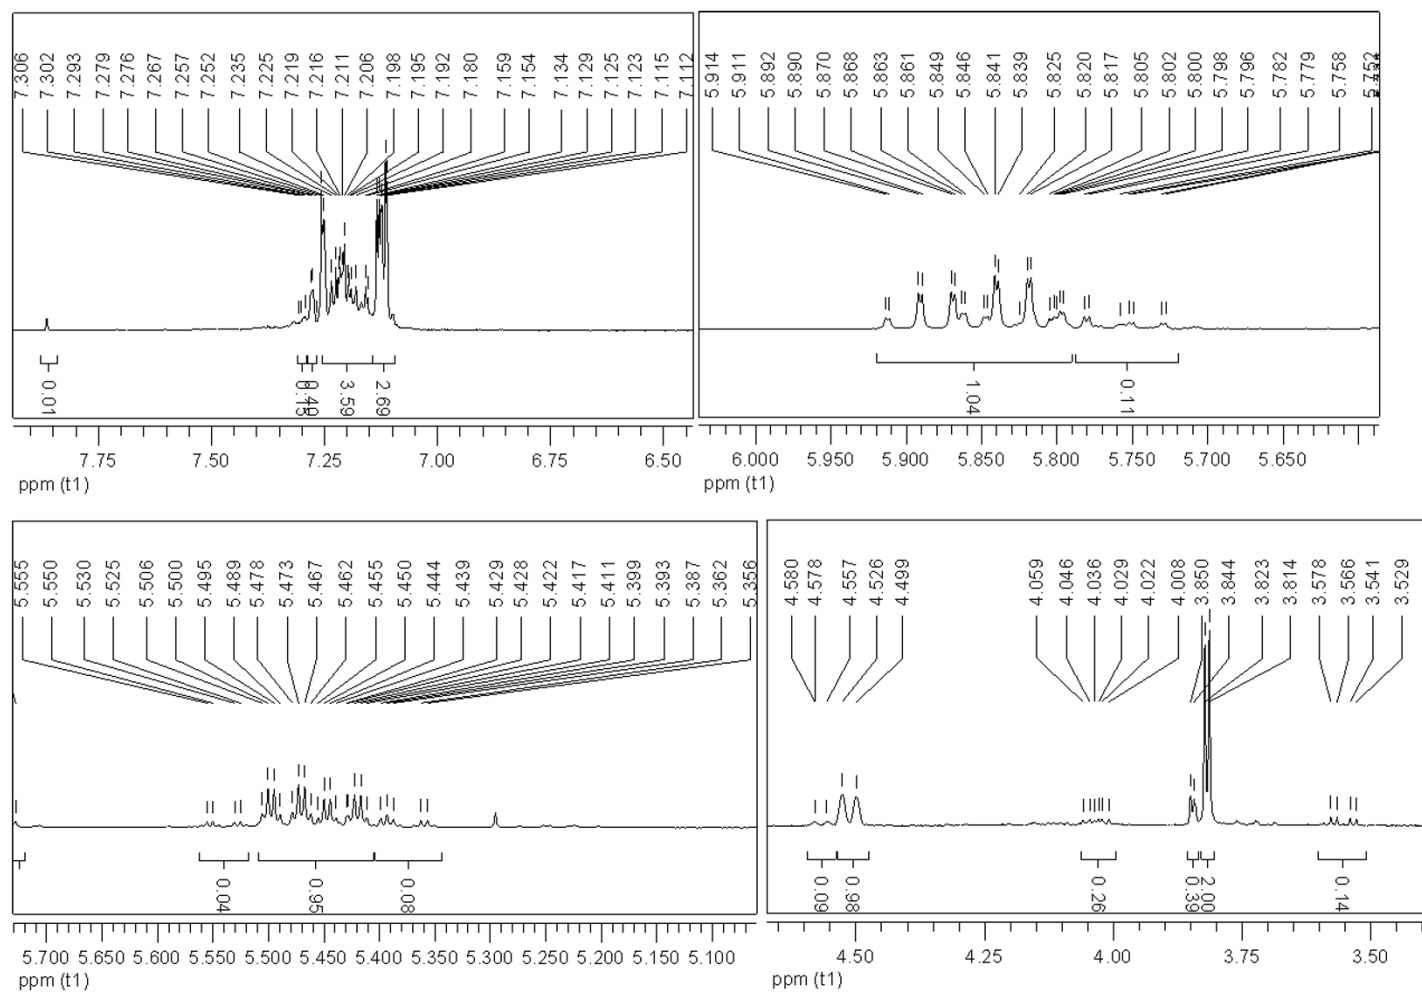

$^1\text{H}$ -NMR of compound *cis*-**7t** (300 MHz,  $\text{CDCl}_3$ )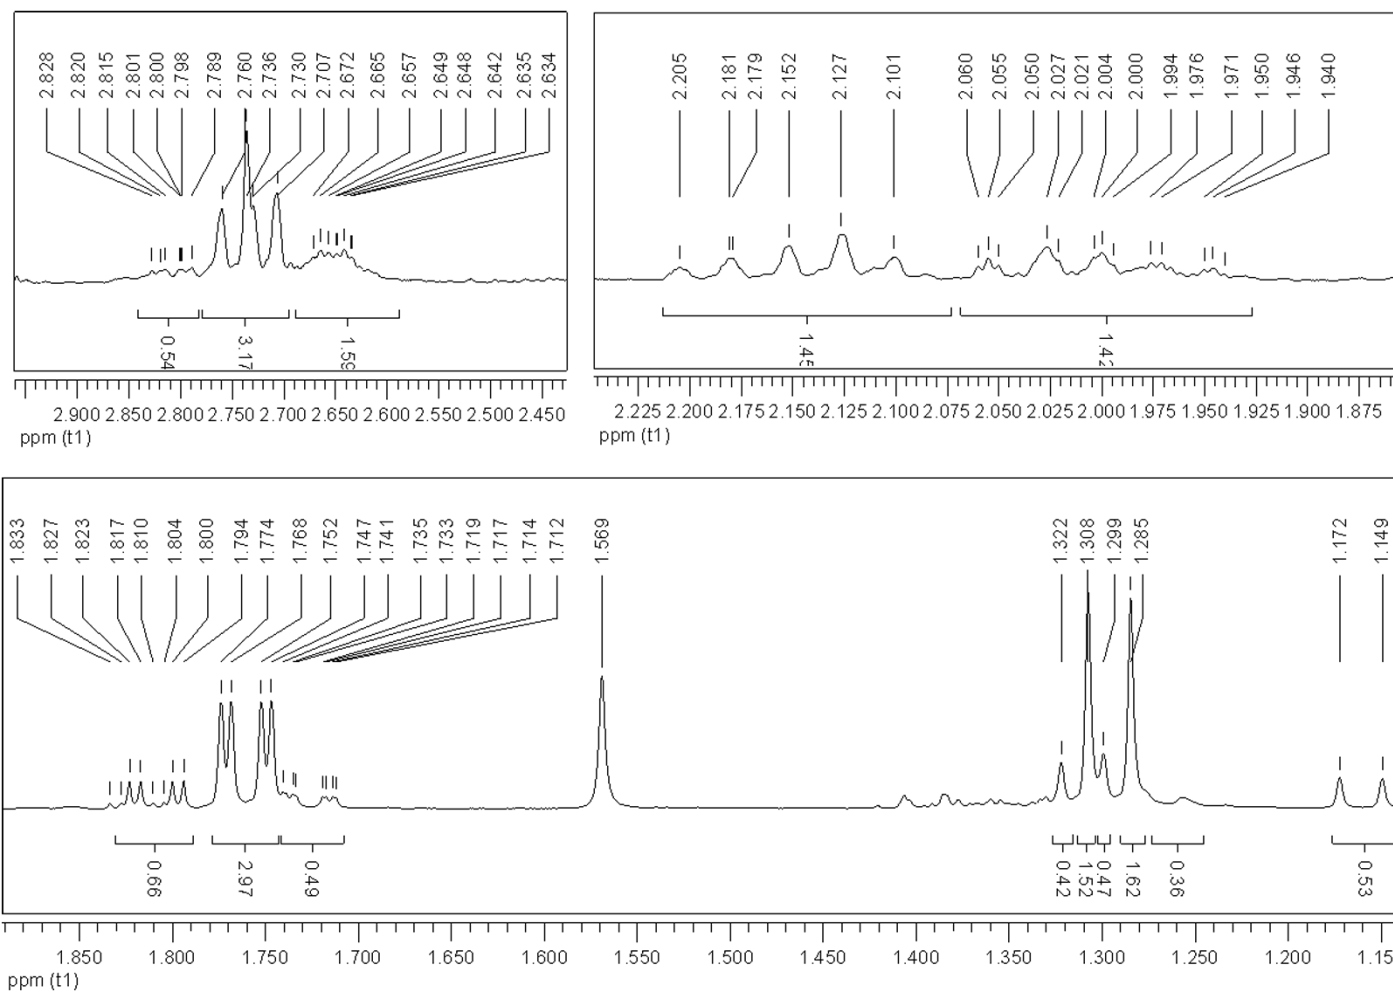

$^{13}\text{C}$ -NMR of compound *cis*-7t (75 MHz,  $\text{CDCl}_3$ )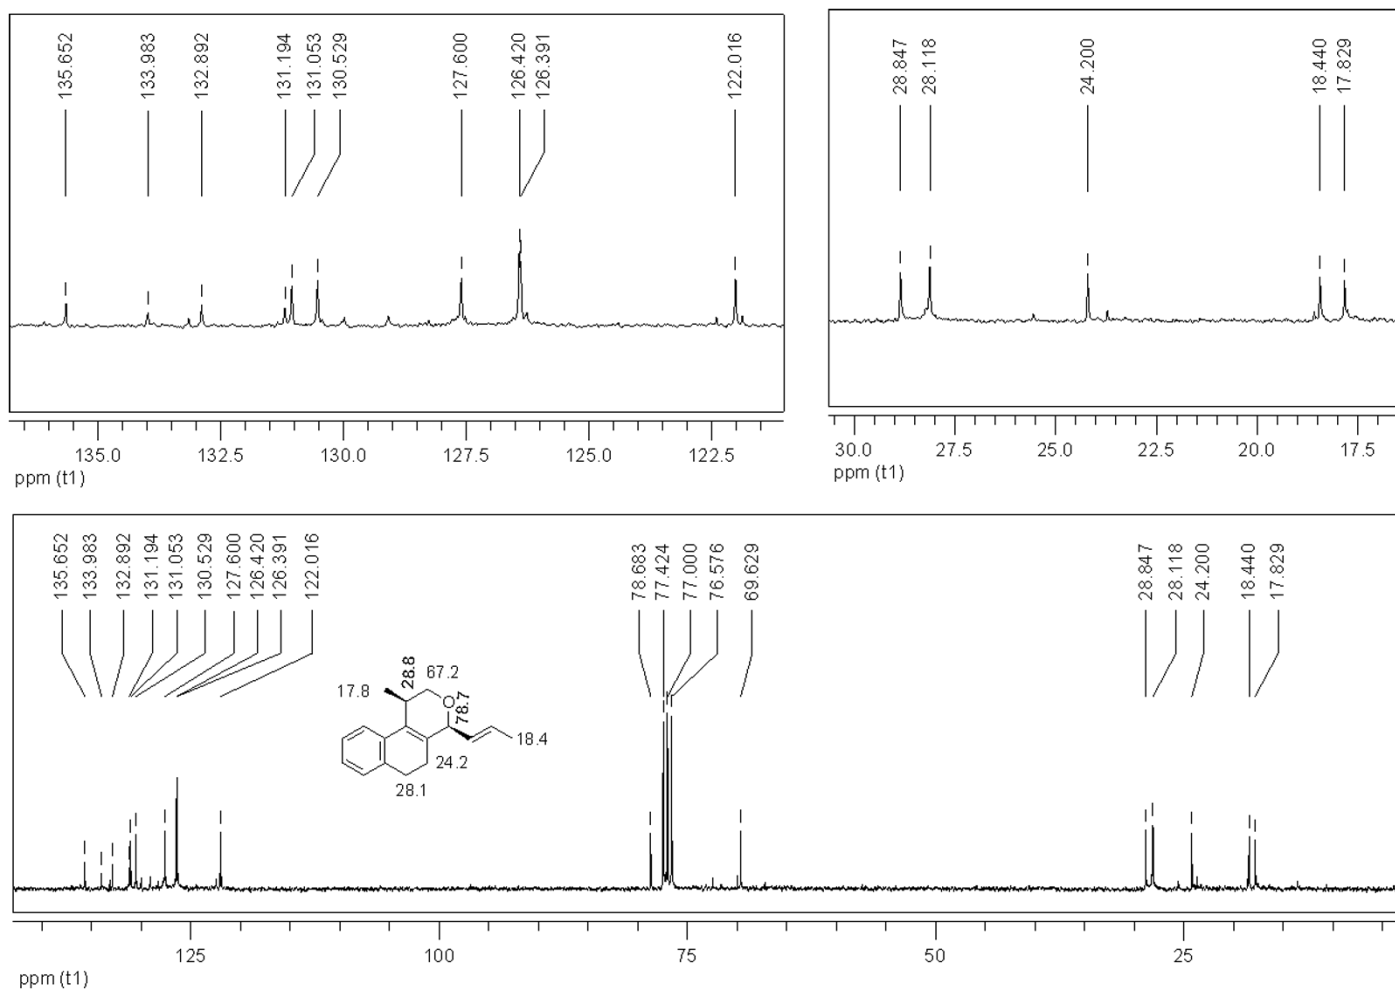

$^1\text{H}$ -NMR of compound *trans*-7t (300 MHz,  $\text{CDCl}_3$ )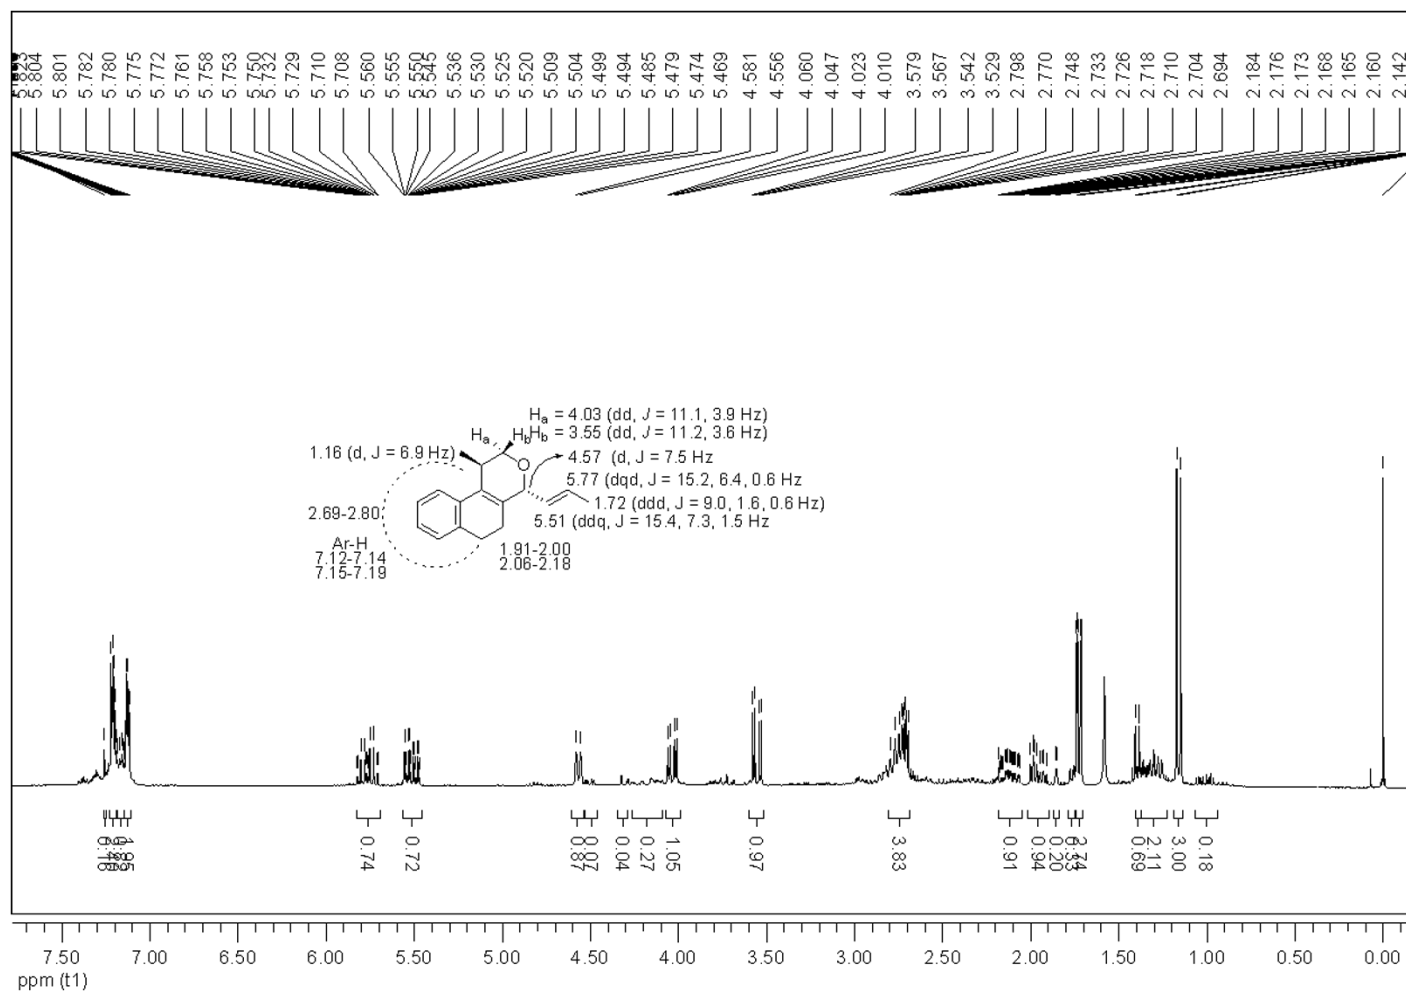

$^1\text{H}$ -NMR of compound *trans*-7t (300 MHz,  $\text{CDCl}_3$ )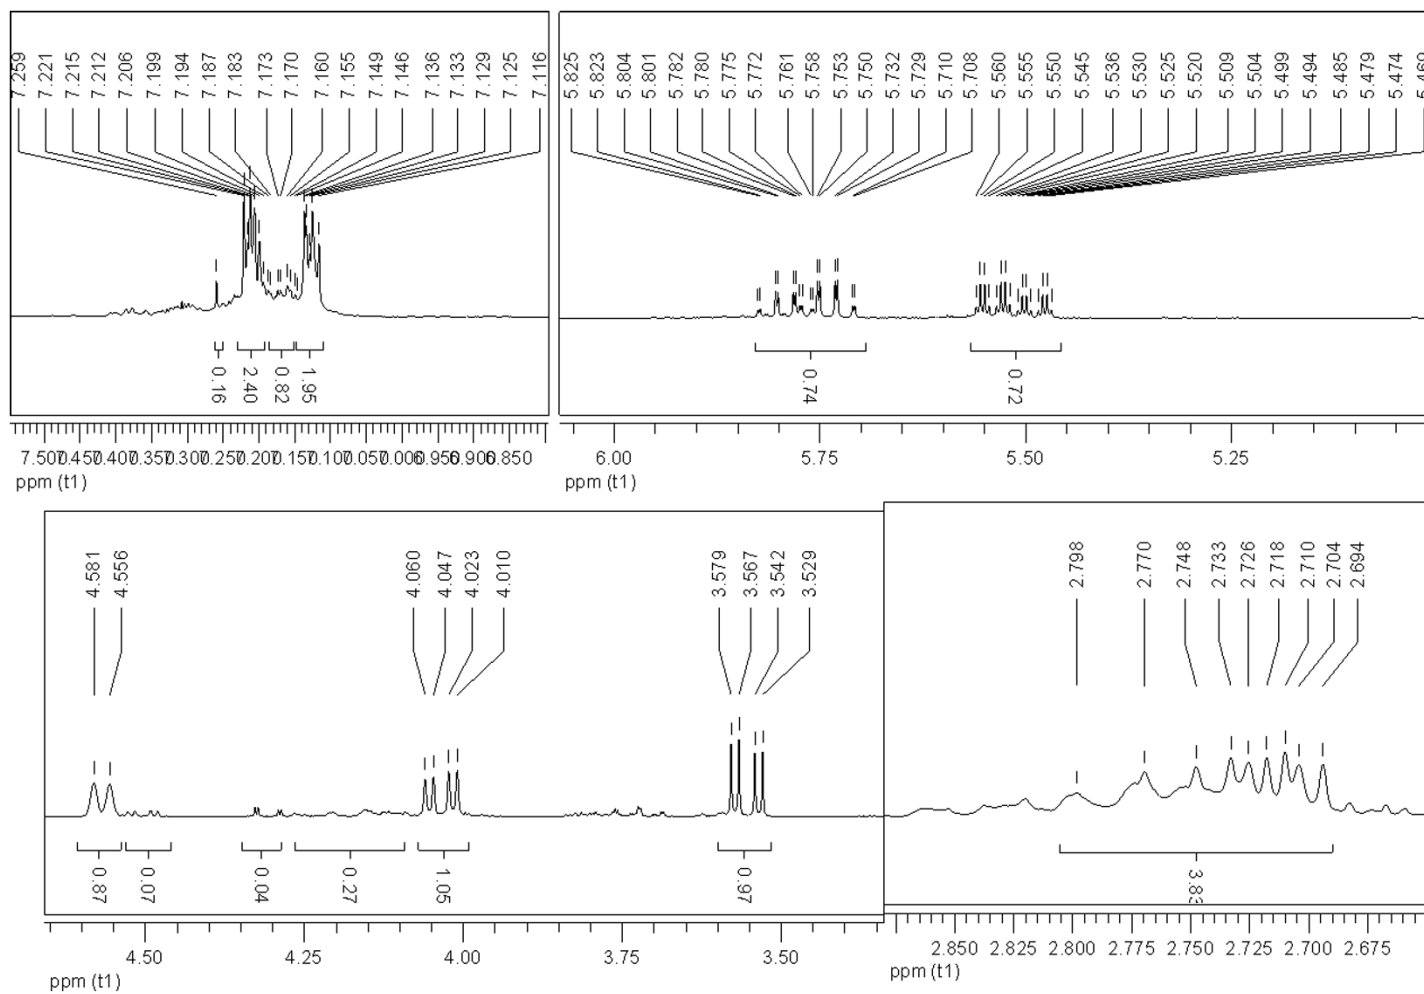

$^1\text{H}$ -NMR of compound *trans*-7t (300 MHz,  $\text{CDCl}_3$ )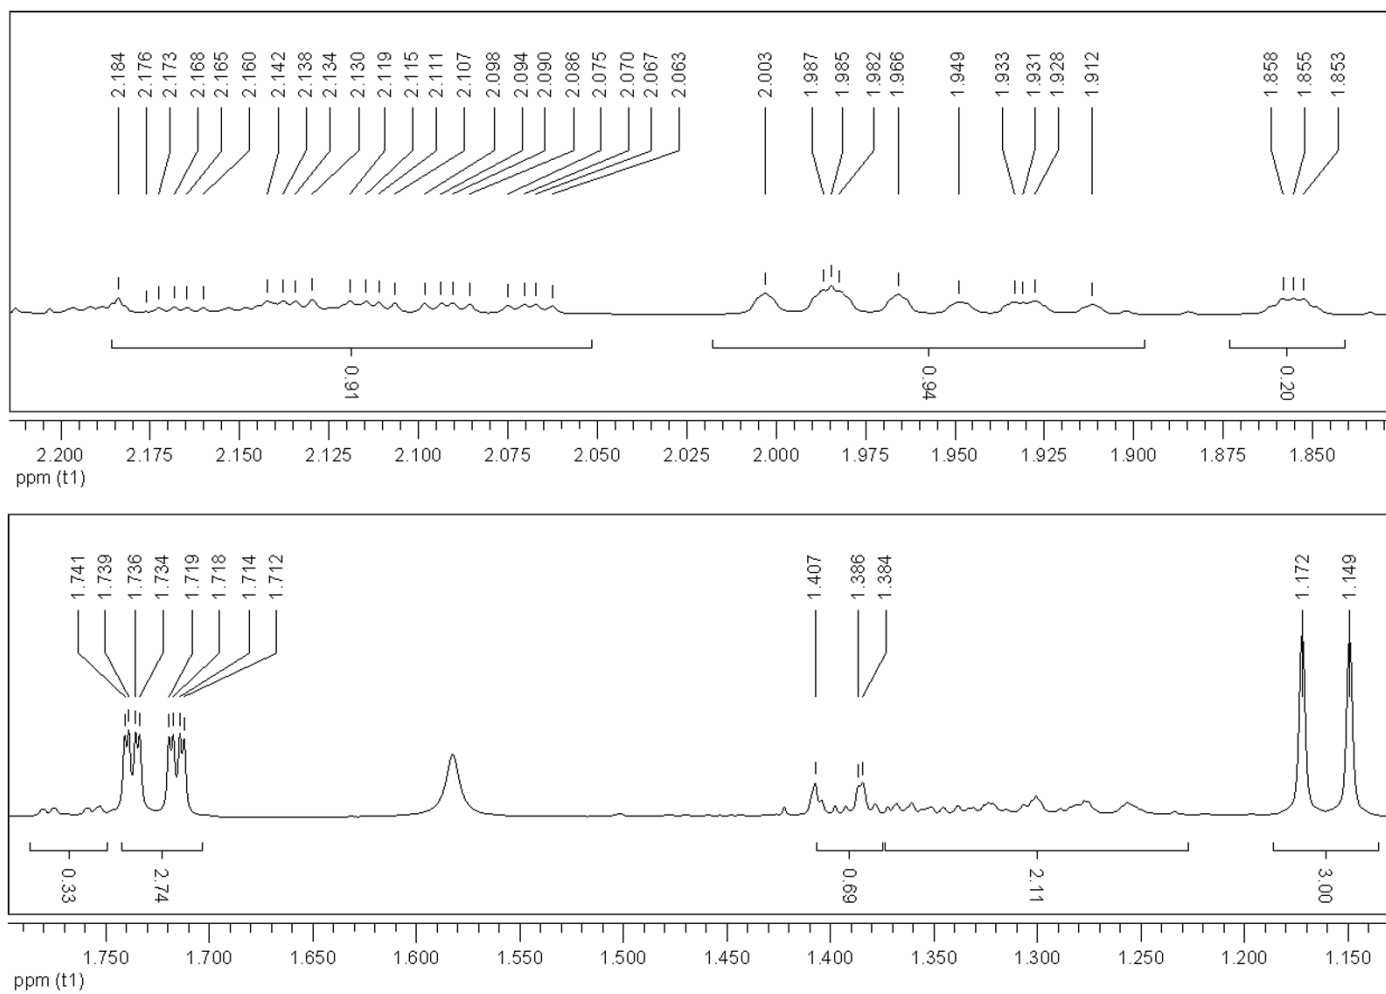

$^{13}\text{C}$ -NMR of compound *trans*-7t (75 MHz,  $\text{CDCl}_3$ )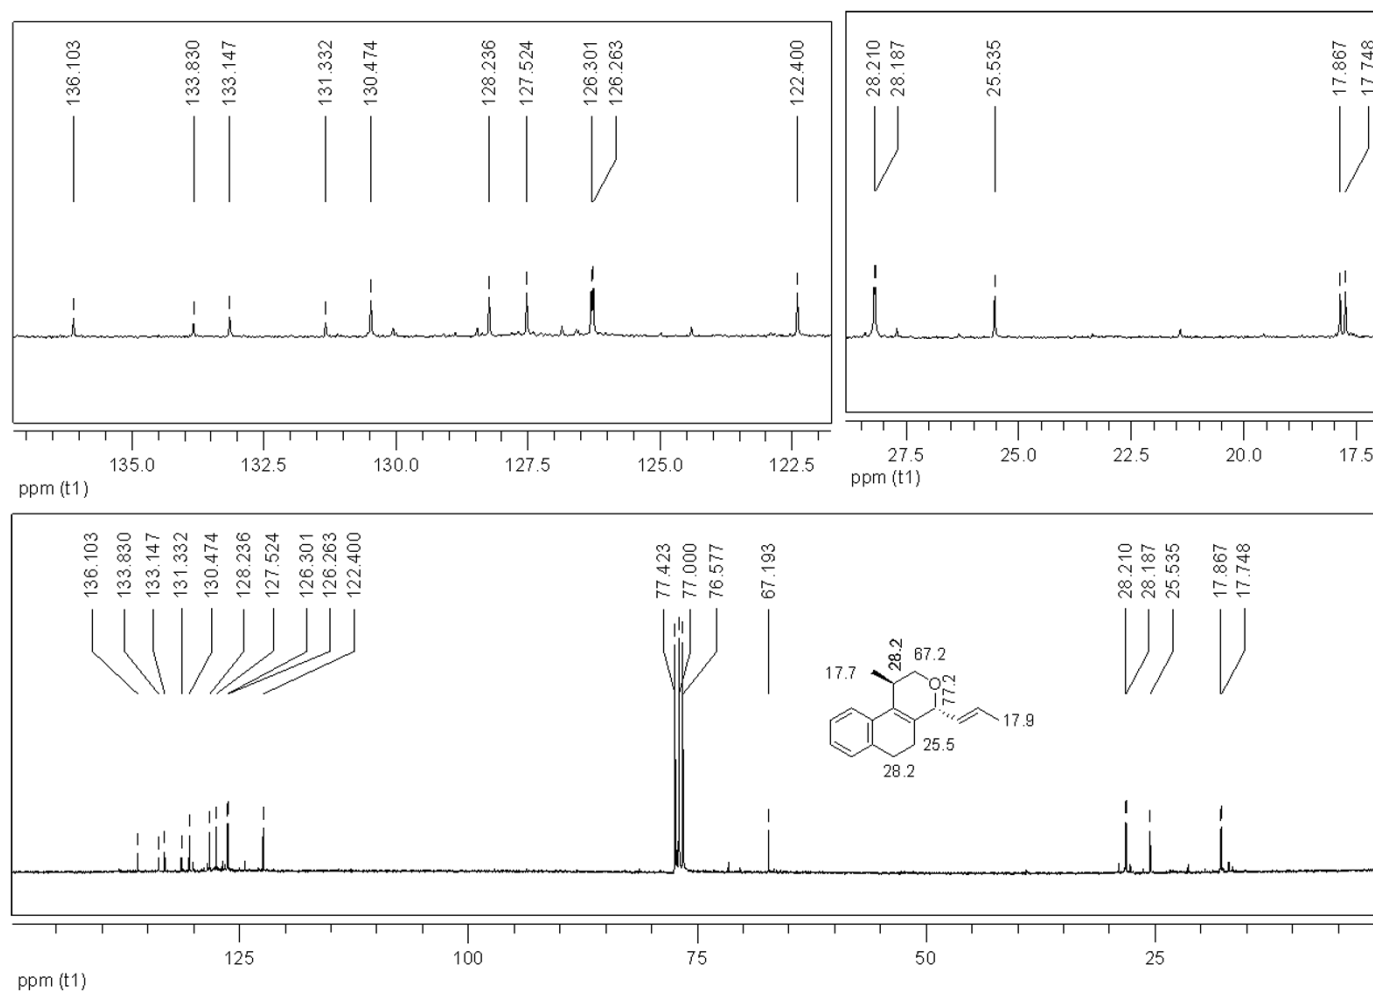

2D NOESY NMR of compound *trans*-7t (300 MHz, CDCl<sub>3</sub>)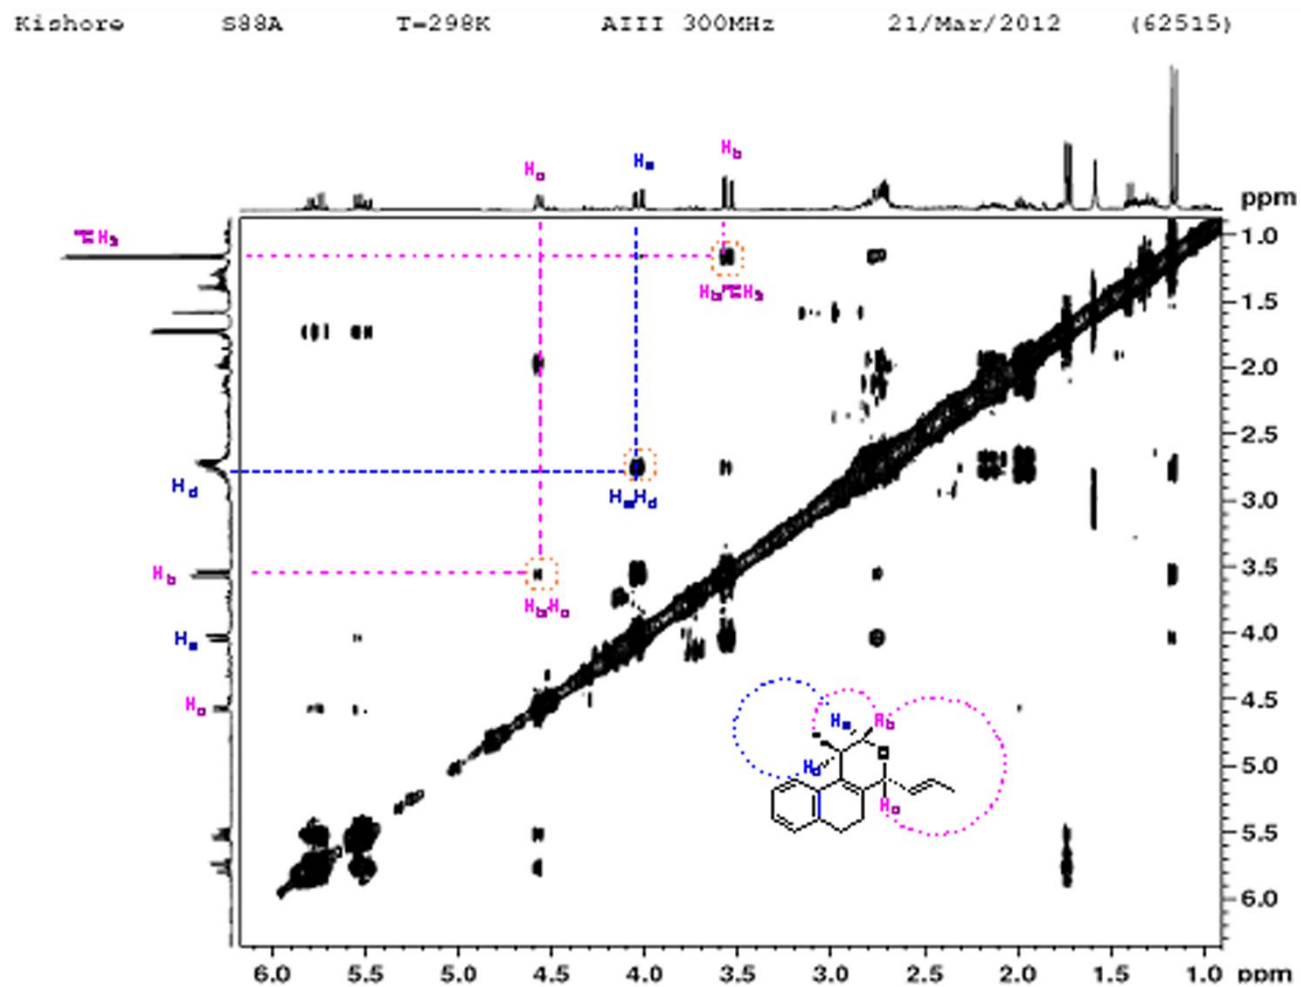

<sup>1</sup>H-NMR of compound *cis*-**7u** (300 MHz, CDCl<sub>3</sub>)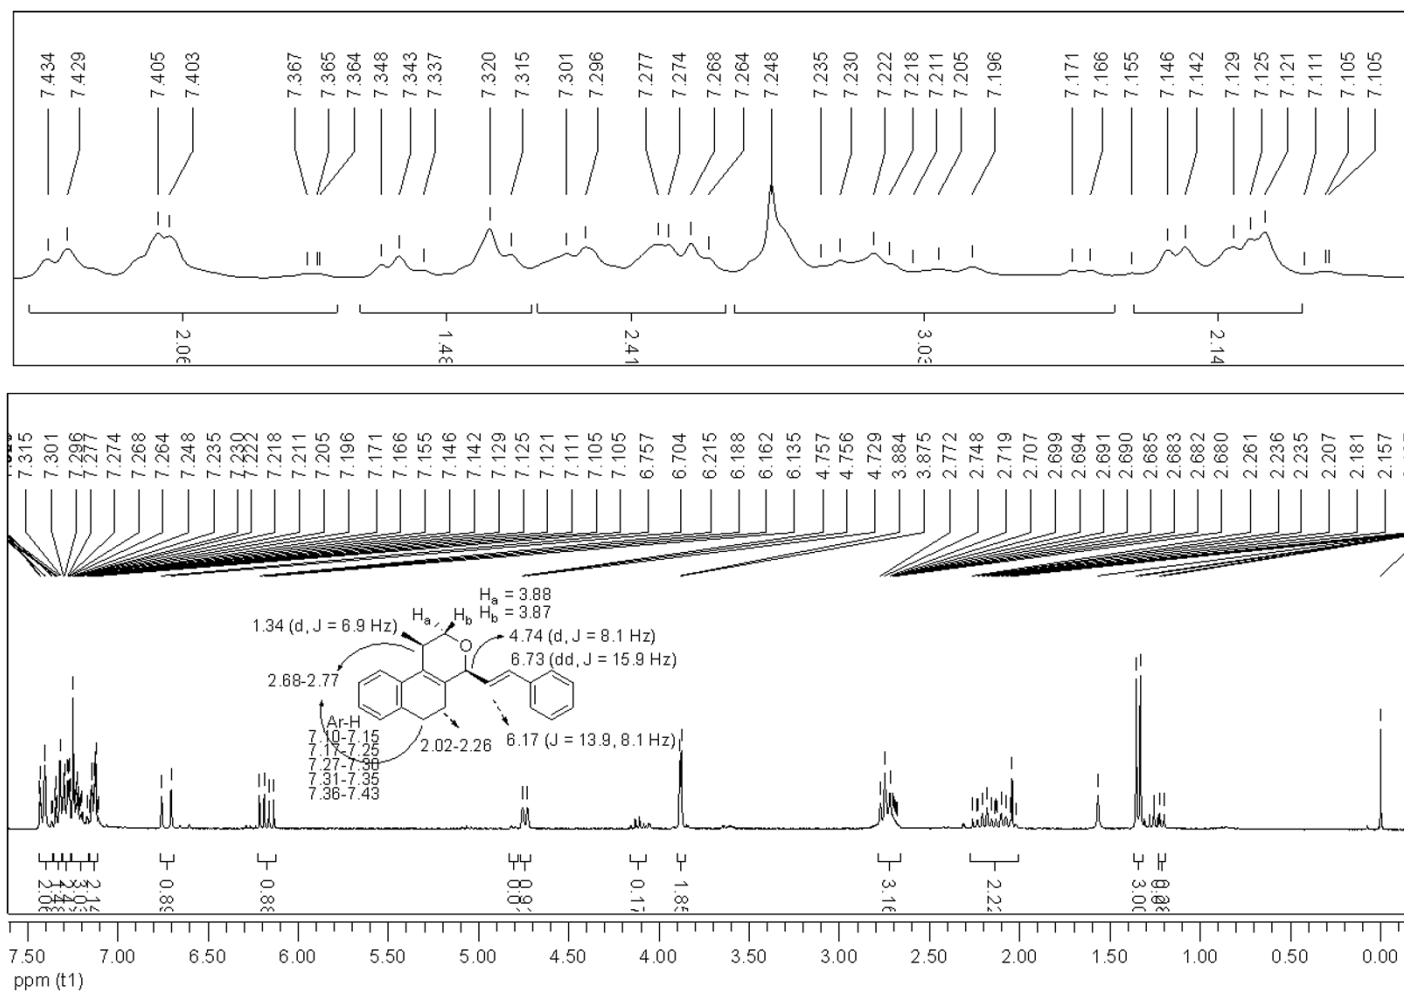

$^1\text{H}$ -NMR of compound *cis*-**7u** (300 MHz,  $\text{CDCl}_3$ )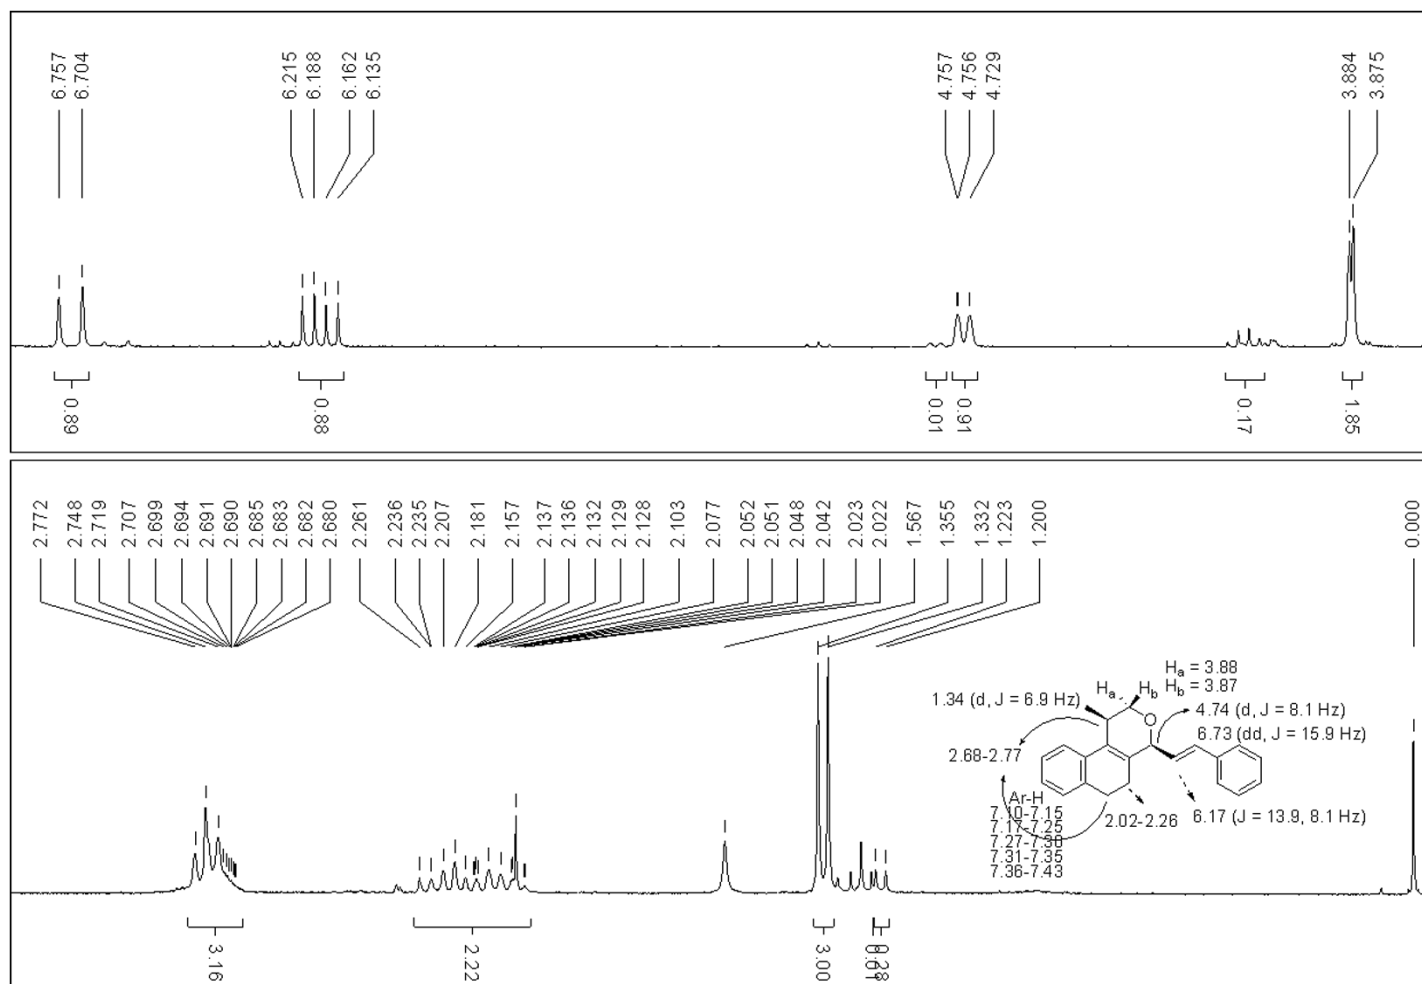

$^{13}\text{C}$ -NMR of compound *cis*-**7u** (75 MHz,  $\text{CDCl}_3$ )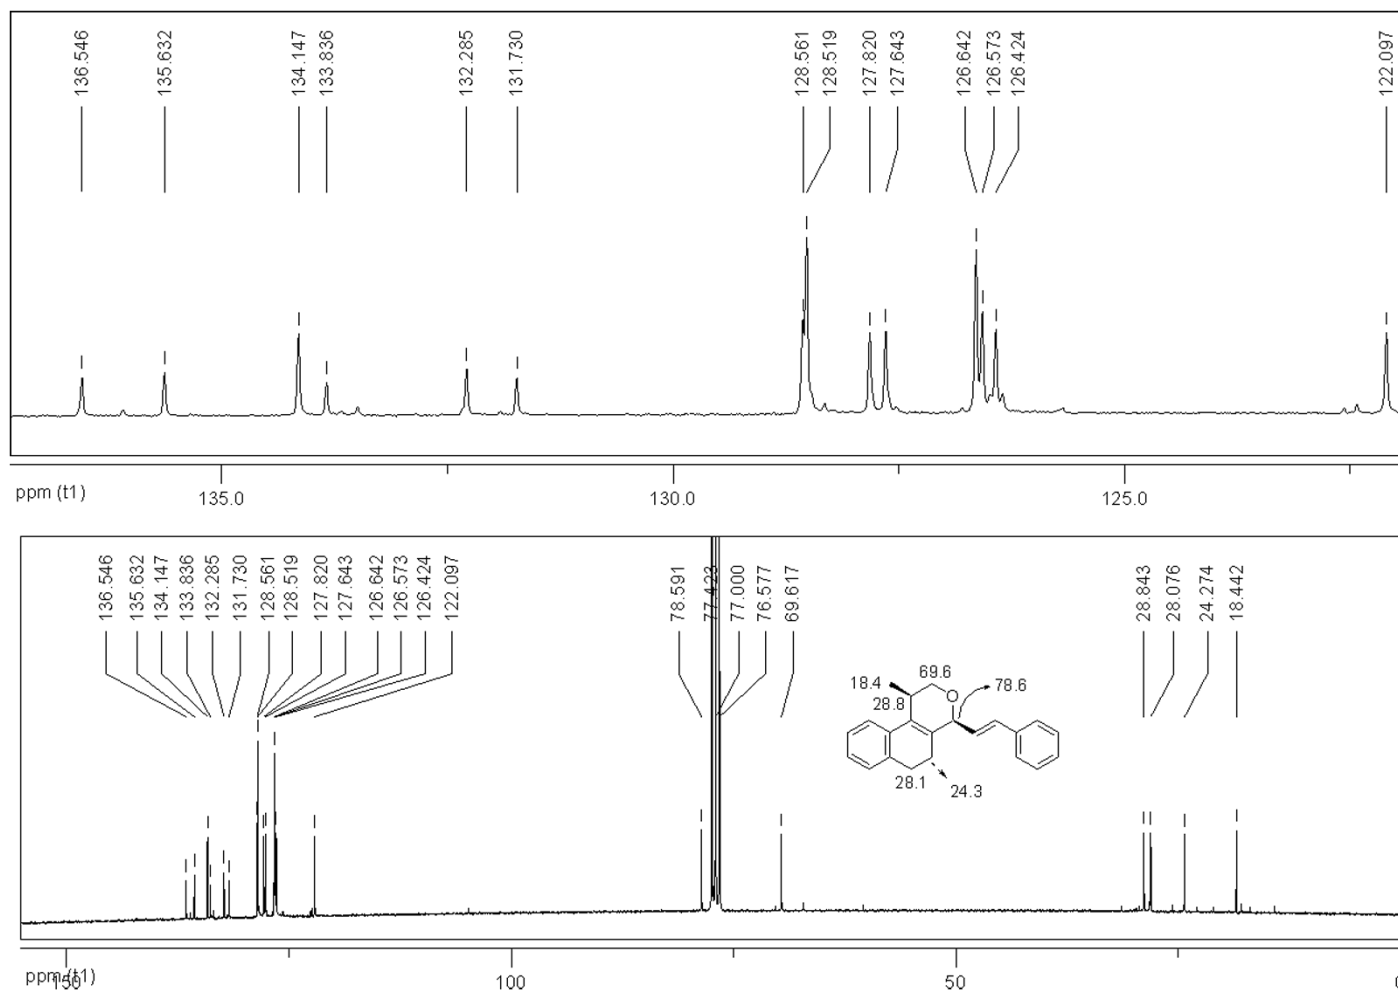

<sup>1</sup>H-NMR of compound *trans*-**7u** (500 MHz, CDCl<sub>3</sub>)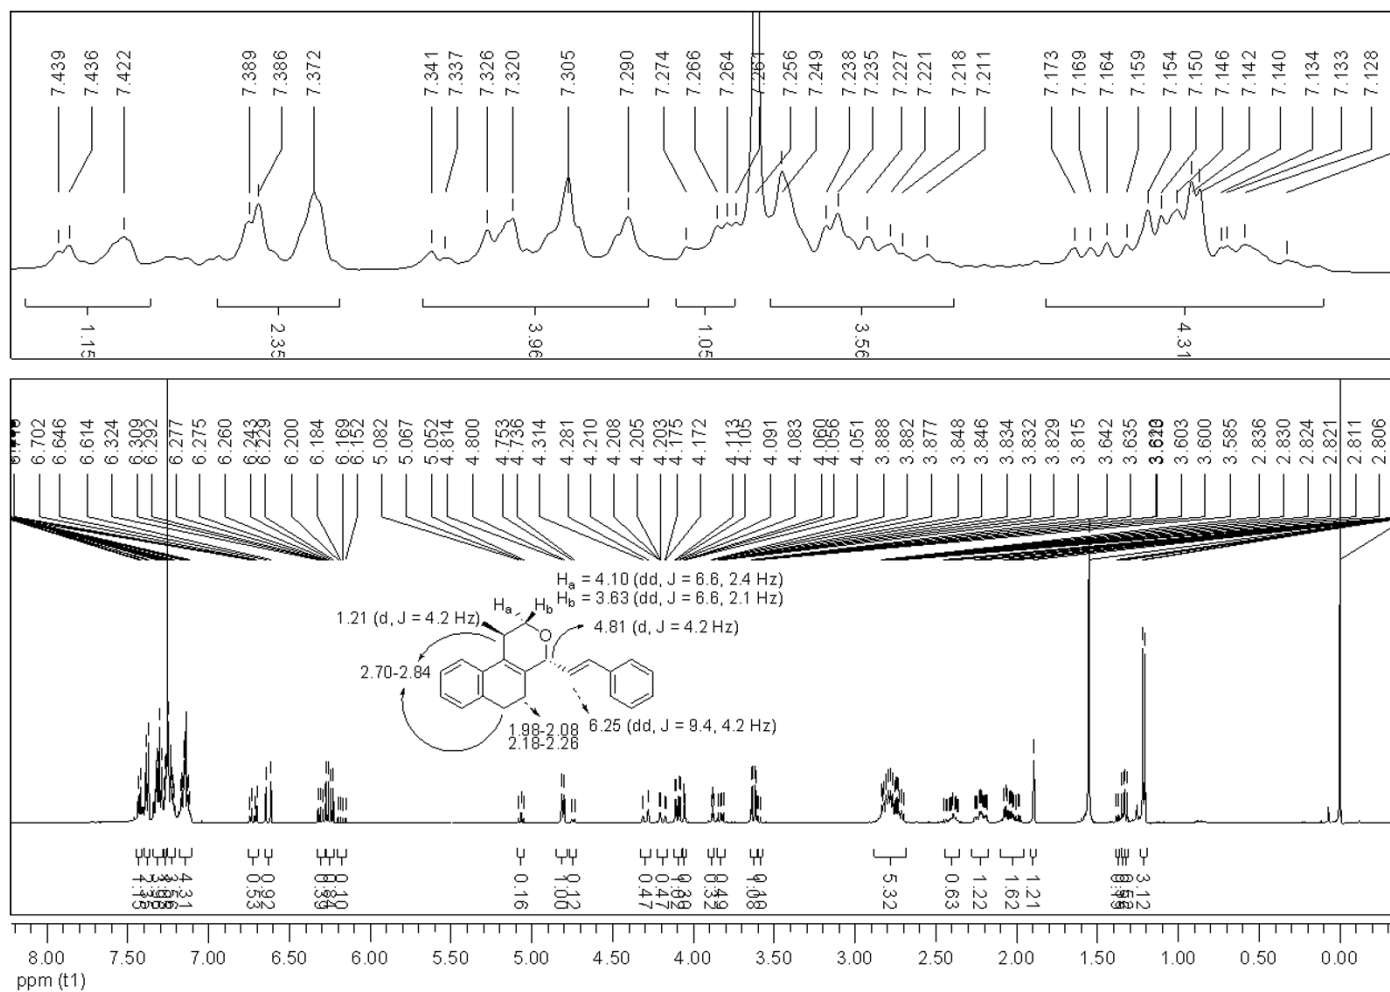

$^1\text{H}$ -NMR of compound *trans*-**7u** (500 MHz,  $\text{CDCl}_3$ )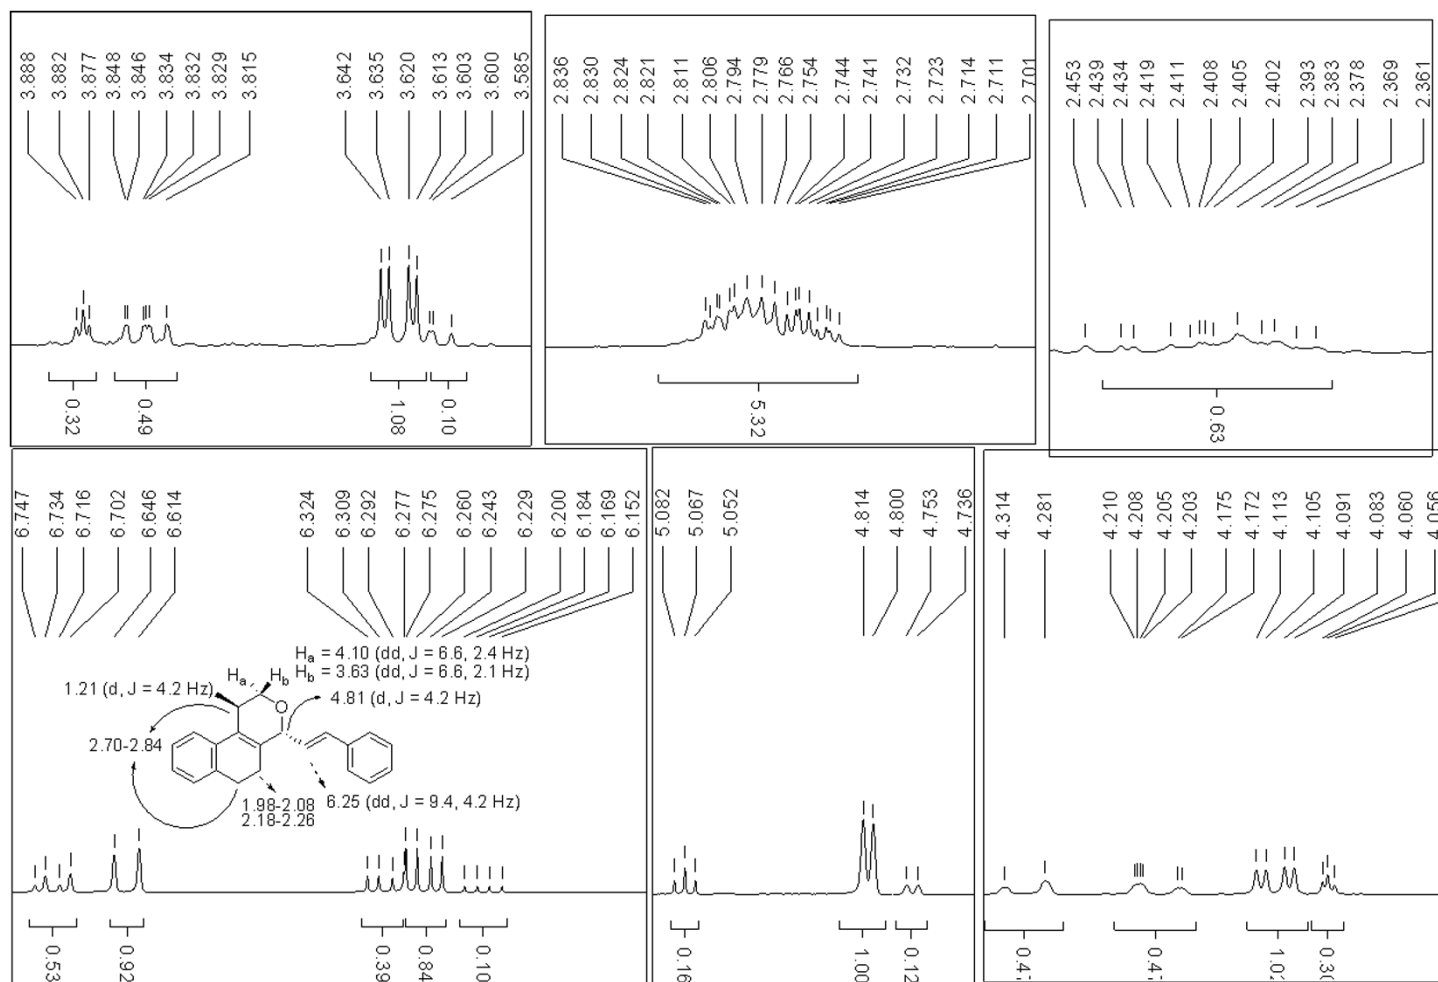

$^1\text{H}$ -NMR of compound *trans*-**7u** (500 MHz,  $\text{CDCl}_3$ )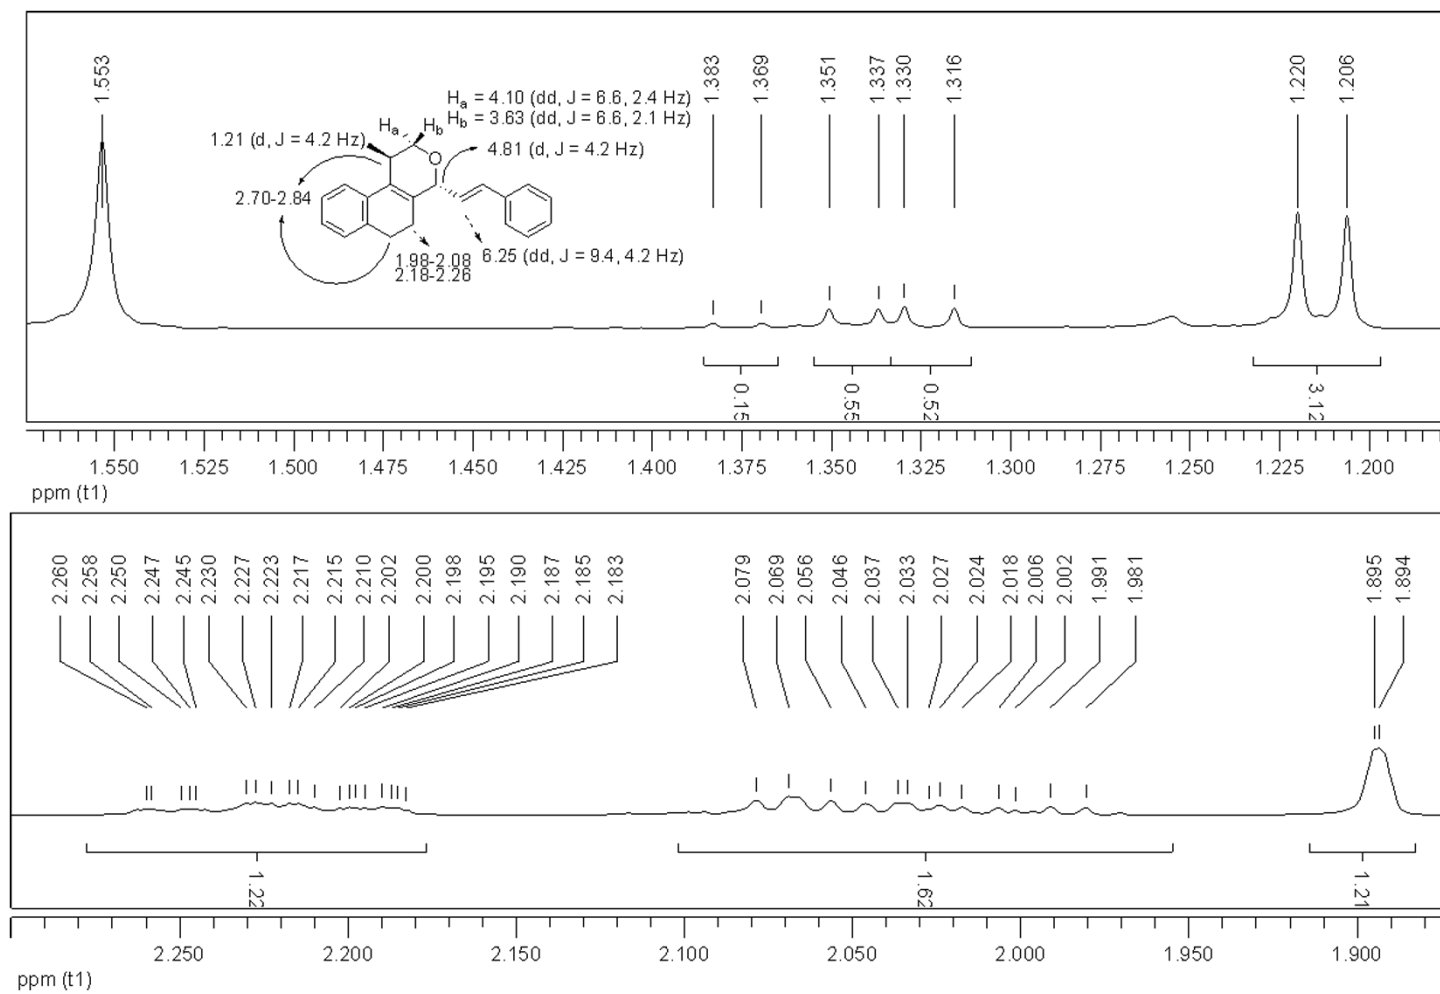

$^{13}\text{C}$ -NMR of compound *trans*-**7u** (50 MHz,  $\text{CDCl}_3$ )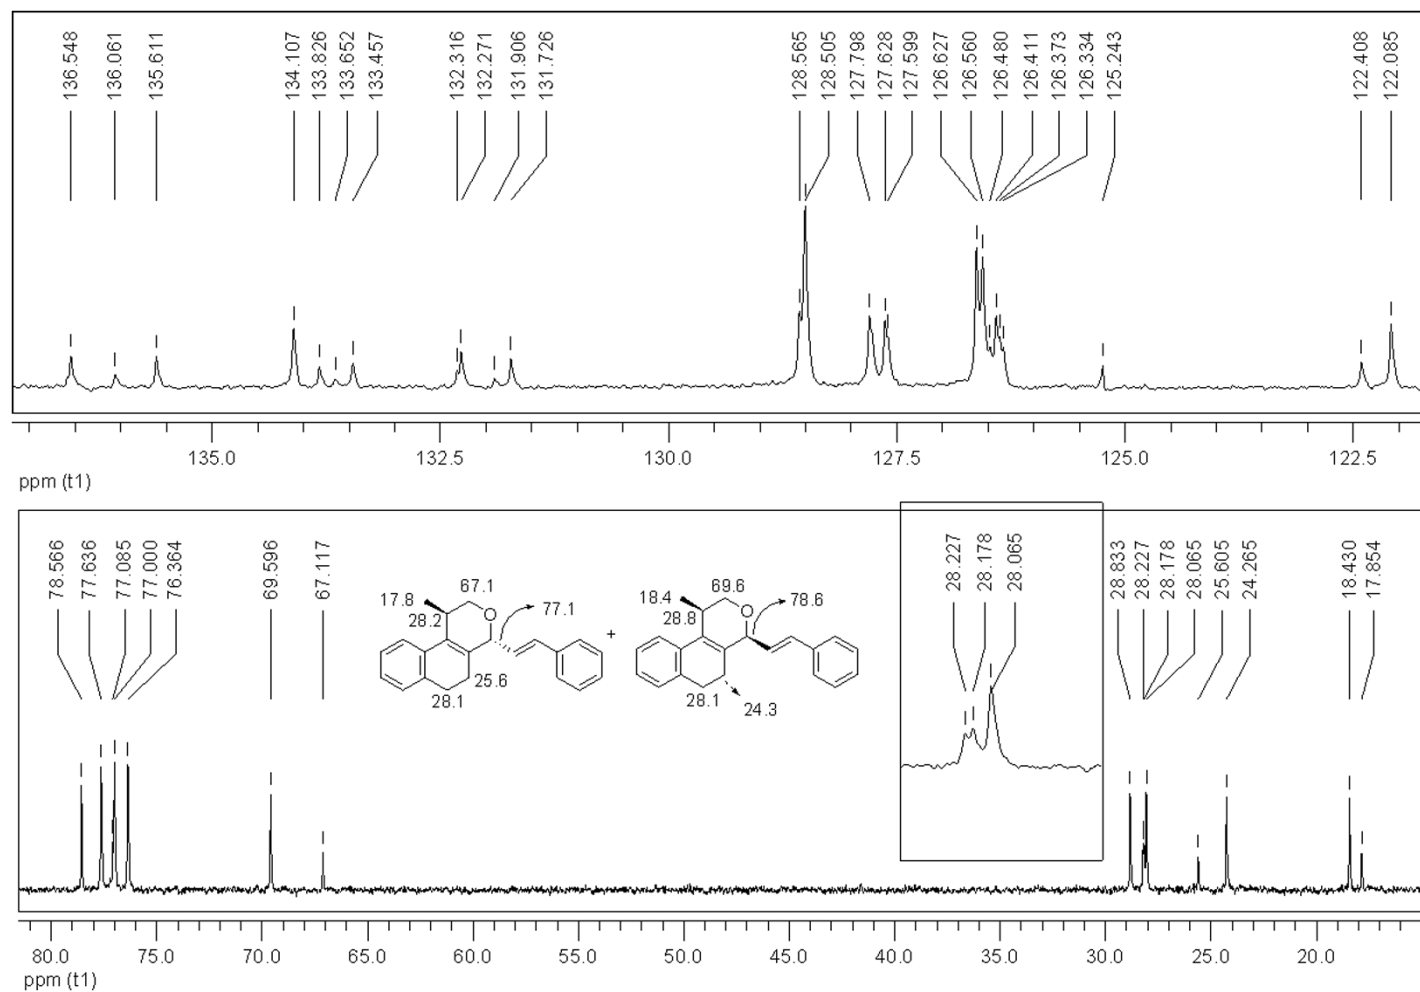

2D NOESY NMR of compound *trans*-7u (500 MHz, CDCl<sub>3</sub>)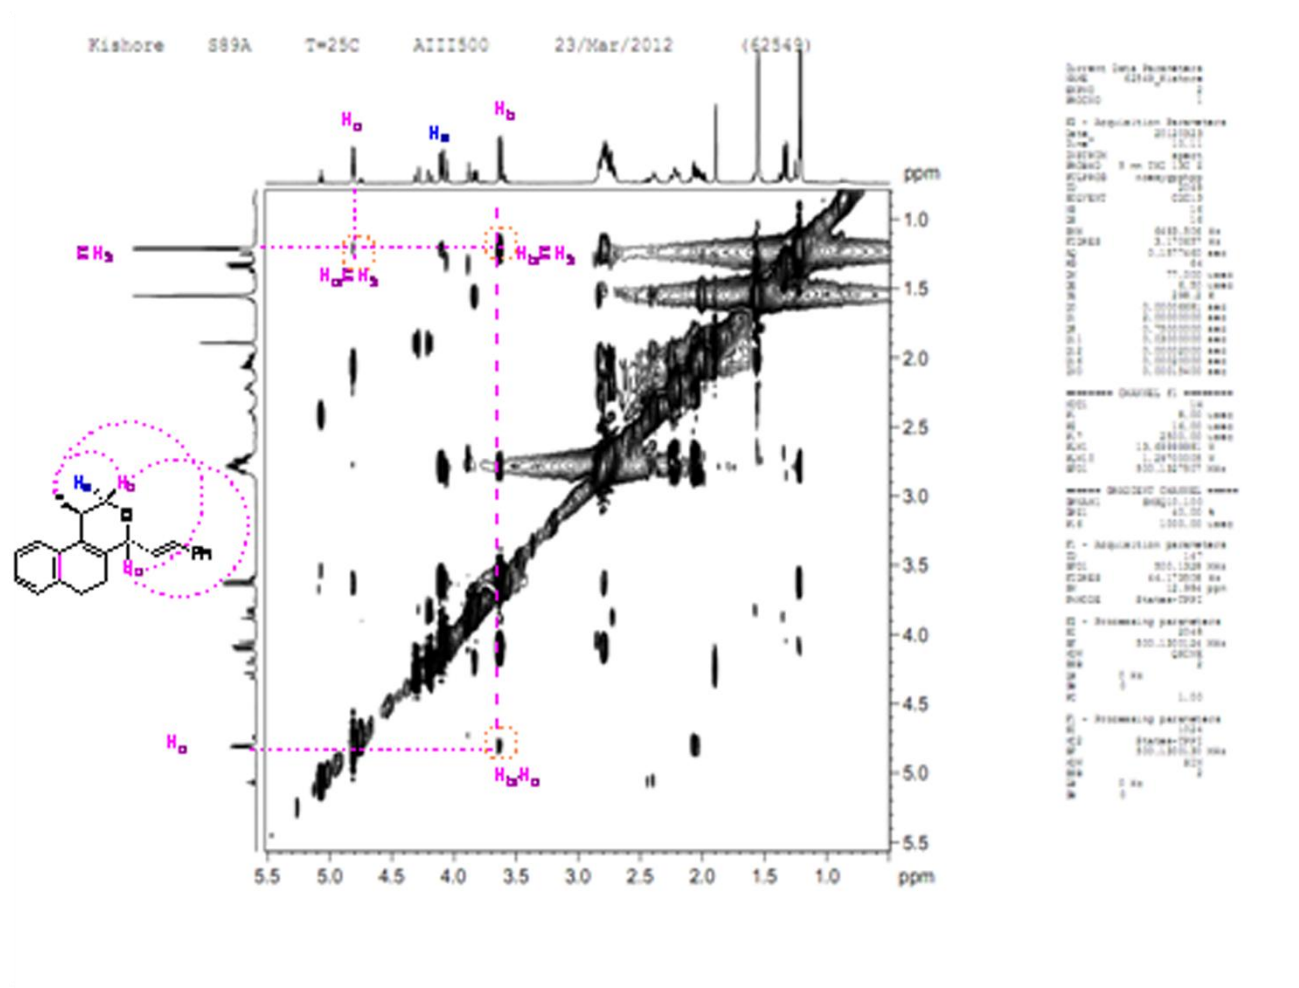

**Chemical Structure 1 (Left):** COc1ccc(cc1)[C@H]2C=C(c3ccccc3)C(OC)[C@H]2C  
Protons labeled: H<sub>a</sub>, H<sub>b</sub>, H<sub>c</sub>, H<sub>d</sub>.  
Coupling constants: 1.48 (d, J = 7.0 Hz), 2.74, 2.82.  
Peak assignments: 3.94, 3.97, 5.43, 3.09, 2.99, 3.80.

**Chemical Structure 2 (Right):** COc1ccc(cc1)[C@H]2C=C(c3ccccc3)C(OC)[C@H]2C  
Protons labeled: H<sub>a</sub>, H<sub>b</sub>, H<sub>c</sub>, H<sub>d</sub>.  
Coupling constants: 1.34 (d, J = 7.0 Hz), 3.49.  
Peak assignments: 3.86, 4.04, 5.50, 3.20, 2.88, 3.80.

**1H NMR Spectrum Data:**

| Chemical Shift (ppm) | Integration |
|----------------------|-------------|
| 7.396 - 7.324        | 9.83        |
| 7.297 - 7.252        | 2.77        |
| 6.917 - 6.847        | 0.66        |
| 5.503 - 5.427        | 0.99        |
| 3.971 - 3.858        | 0.97        |
| 3.954 - 3.879        | 0.42        |
| 3.867 - 3.804        | 0.46        |
| 3.799 - 3.701        | 0.48        |
| 3.531 - 3.437        | 0.43        |
| 3.505 - 3.474        | 0.40        |
| 3.448 - 3.437        | 0.46        |
| 3.201 - 3.084        | 2.99        |
| 3.095 - 2.988        | 1.09        |
| 2.876 - 2.816        | 1.09        |
| 2.816 - 2.799        | 1.09        |
| 2.799 - 2.781        | 1.09        |
| 2.781 - 2.739        | 1.09        |
| 2.739 - 2.701        | 1.09        |
| 2.701 - 2.684        | 1.09        |
| 2.684 - 2.667        | 1.09        |
| 2.667 - 2.650        | 1.09        |
| 2.650 - 2.633        | 1.09        |
| 2.633 - 2.616        | 1.09        |
| 2.616 - 2.599        | 1.09        |
| 2.599 - 2.582        | 1.09        |
| 2.582 - 2.565        | 1.09        |
| 2.565 - 2.548        | 1.09        |
| 2.548 - 2.531        | 1.09        |
| 2.531 - 2.514        | 1.09        |
| 2.514 - 2.497        | 1.09        |
| 2.497 - 2.480        | 1.09        |
| 2.480 - 2.463        | 1.09        |
| 2.463 - 2.446        | 1.09        |
| 2.446 - 2.429        | 1.09        |
| 2.429 - 2.412        | 1.09        |
| 2.412 - 2.395        | 1.09        |
| 2.395 - 2.378        | 1.09        |
| 2.378 - 2.361        | 1.09        |
| 2.361 - 2.344        | 1.09        |
| 2.344 - 2.327        | 1.09        |
| 2.327 - 2.310        | 1.09        |
| 2.310 - 2.293        | 1.09        |
| 2.293 - 2.276        | 1.09        |
| 2.276 - 2.259        | 1.09        |
| 2.259 - 2.242        | 1.09        |
| 2.242 - 2.225        | 1.09        |
| 2.225 - 2.208        | 1.09        |
| 2.208 - 2.191        | 1.09        |
| 2.191 - 2.174        | 1.09        |
| 2.174 - 2.157        | 1.09        |
| 2.157 - 2.140        | 1.09        |
| 2.140 - 2.123        | 1.09        |
| 2.123 - 2.106        | 1.09        |
| 2.106 - 2.089        | 1.09        |
| 2.089 - 2.072        | 1.09        |
| 2.072 - 2.055        | 1.09        |
| 2.055 - 2.038        | 1.09        |
| 2.038 - 2.021        | 1.09        |
| 2.021 - 2.004        | 1.09        |
| 2.004 - 1.987        | 1.09        |
| 1.987 - 1.970        | 1.09        |
| 1.970 - 1.953        | 1.09        |
| 1.953 - 1.936        | 1.09        |
| 1.936 - 1.919        | 1.09        |
| 1.919 - 1.902        | 1.09        |
| 1.902 - 1.885        | 1.09        |
| 1.885 - 1.868        | 1.09        |
| 1.868 - 1.851        | 1.09        |
| 1.851 - 1.834        | 1.09        |
| 1.834 - 1.817        | 1.09        |
| 1.817 - 1.800        | 1.09        |
| 1.800 - 1.783        | 1.09        |
| 1.783 - 1.766        | 1.09        |
| 1.766 - 1.749        | 1.09        |
| 1.749 - 1.732        | 1.09        |
| 1.732 - 1.715        | 1.09        |
| 1.715 - 1.698        | 1.09        |
| 1.698 - 1.681        | 1.09        |
| 1.681 - 1.664        | 1.09        |
| 1.664 - 1.647        | 1.09        |
| 1.647 - 1.630        | 1.09        |
| 1.630 - 1.613        | 1.09        |
| 1.613 - 1.596        | 1.09        |
| 1.596 - 1.579        | 1.09        |
| 1.579 - 1.562        | 1.09        |
| 1.562 - 1.545        | 1.09        |
| 1.545 - 1.528        | 1.09        |
| 1.528 - 1.511        | 1.09        |
| 1.511 - 1.494        | 1.09        |
| 1.494 - 1.477        | 1.09        |
| 1.477 - 1.460        | 1.09        |
| 1.460 - 1.443        | 1.09        |
| 1.443 - 1.426        | 1.09        |
| 1.426 - 1.409        | 1.09        |
| 1.409 - 1.392        | 1.09        |
| 1.392 - 1.375        | 1.09        |
| 1.375 - 1.358        | 1.09        |
| 1.358 - 1.341        | 1.09        |
| 1.341 - 1.324        | 1.09        |
| 1.324 - 1.307        | 1.09        |
| 1.307 - 1.290        | 1.09        |
| 1.290 - 1.273        | 1.09        |
| 1.273 - 1.256        | 1.09        |
| 1.256 - 1.239        | 1.09        |
| 1.239 - 1.222        | 1.09        |
| 1.222 - 1.205        | 1.09        |
| 1.205 - 1.188        | 1.09        |
| 1.188 - 1.171        | 1.09        |
| 1.171 - 1.154        | 1.09        |
| 1.154 - 1.137        | 1.09        |
| 1.137 - 1.120        | 1.09        |
| 1.120 - 1.103        | 1.09        |
| 1.103 - 1.086        | 1.09        |
| 1.086 - 1.069        | 1.09        |
| 1.069 - 1.052        | 1.09        |
| 1.052 - 1.035        | 1.09        |
| 1.035 - 1.018        | 1.09        |
| 1.018 - 1.001        | 1.09        |
| 1.001 - 0.984        | 1.09        |
| 0.984 - 0.967        | 1.09        |
| 0.967 - 0.950        | 1.09        |
| 0.950 - 0.933        | 1.09        |
| 0                    |             |

<sup>1</sup>H-NMR of compounds *cis*-**13b** and *trans*-**13b** (300 MHz, CDCl<sub>3</sub>)

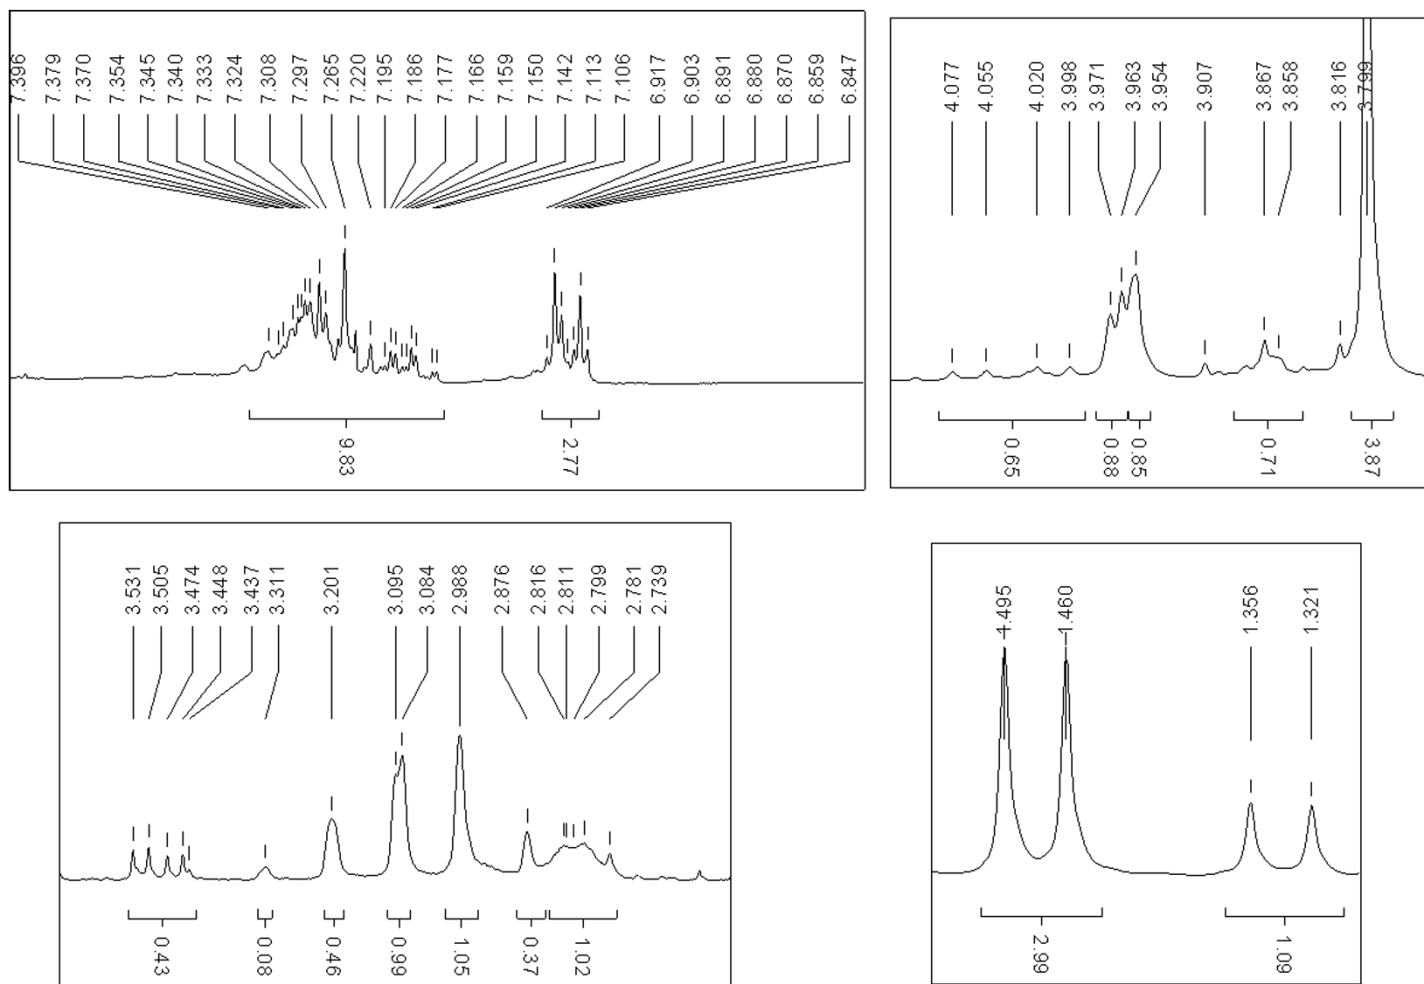

$^{13}\text{C}$ -NMR of compounds *cis*-**13b** and *trans*-**13b** (75 MHz,  $\text{CDCl}_3$ )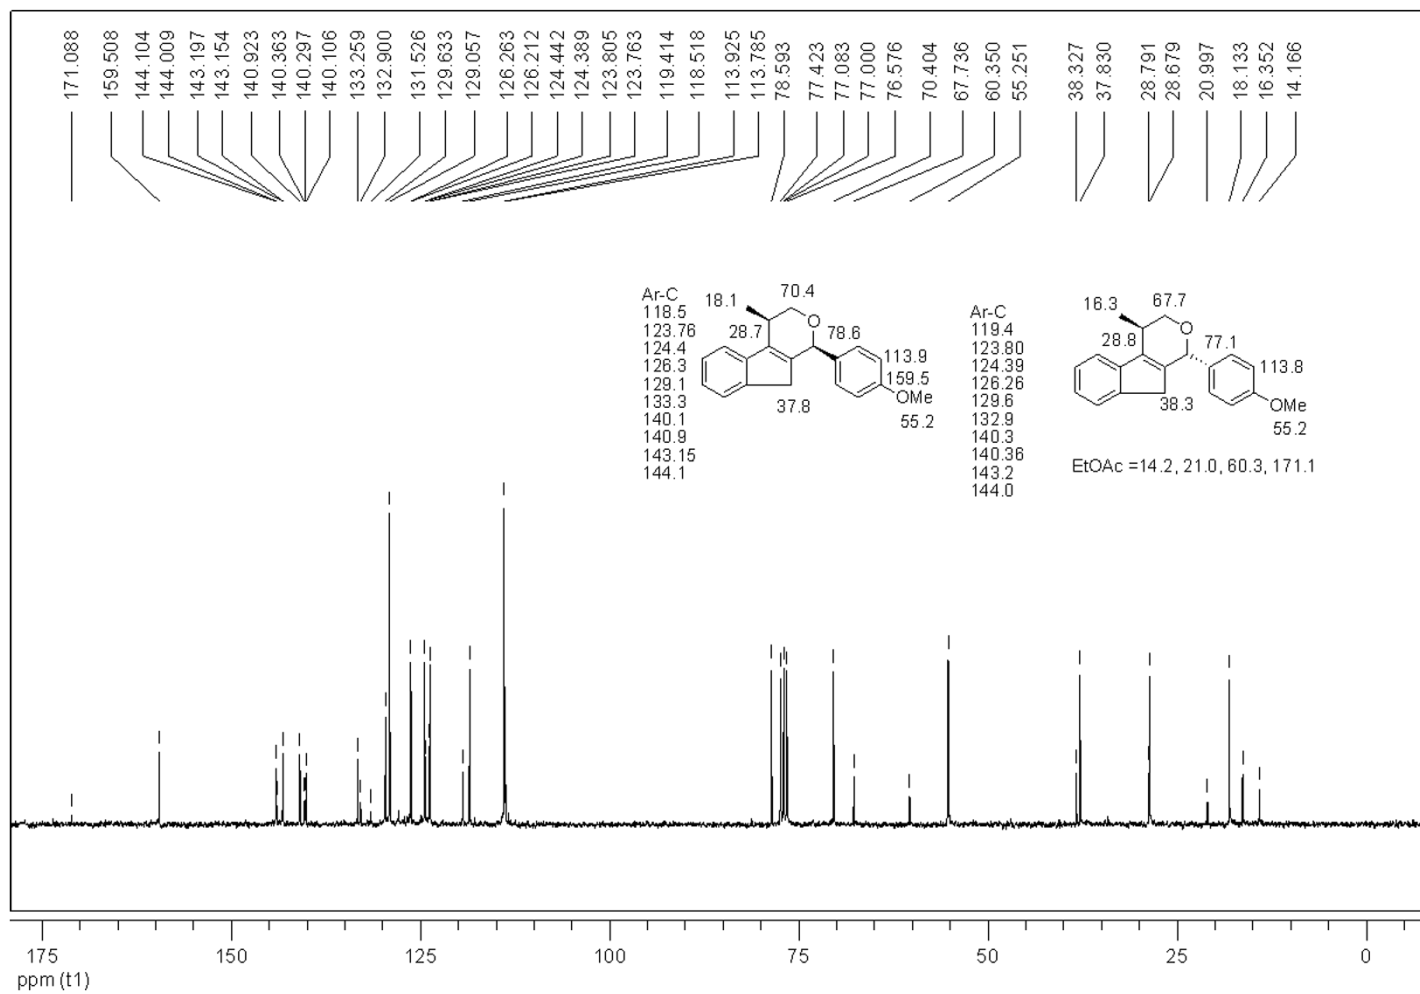

$^{13}\text{C}$ -NMR of compounds *cis*-**13b** and *trans*-**13b** (75 MHz,  $\text{CDCl}_3$ )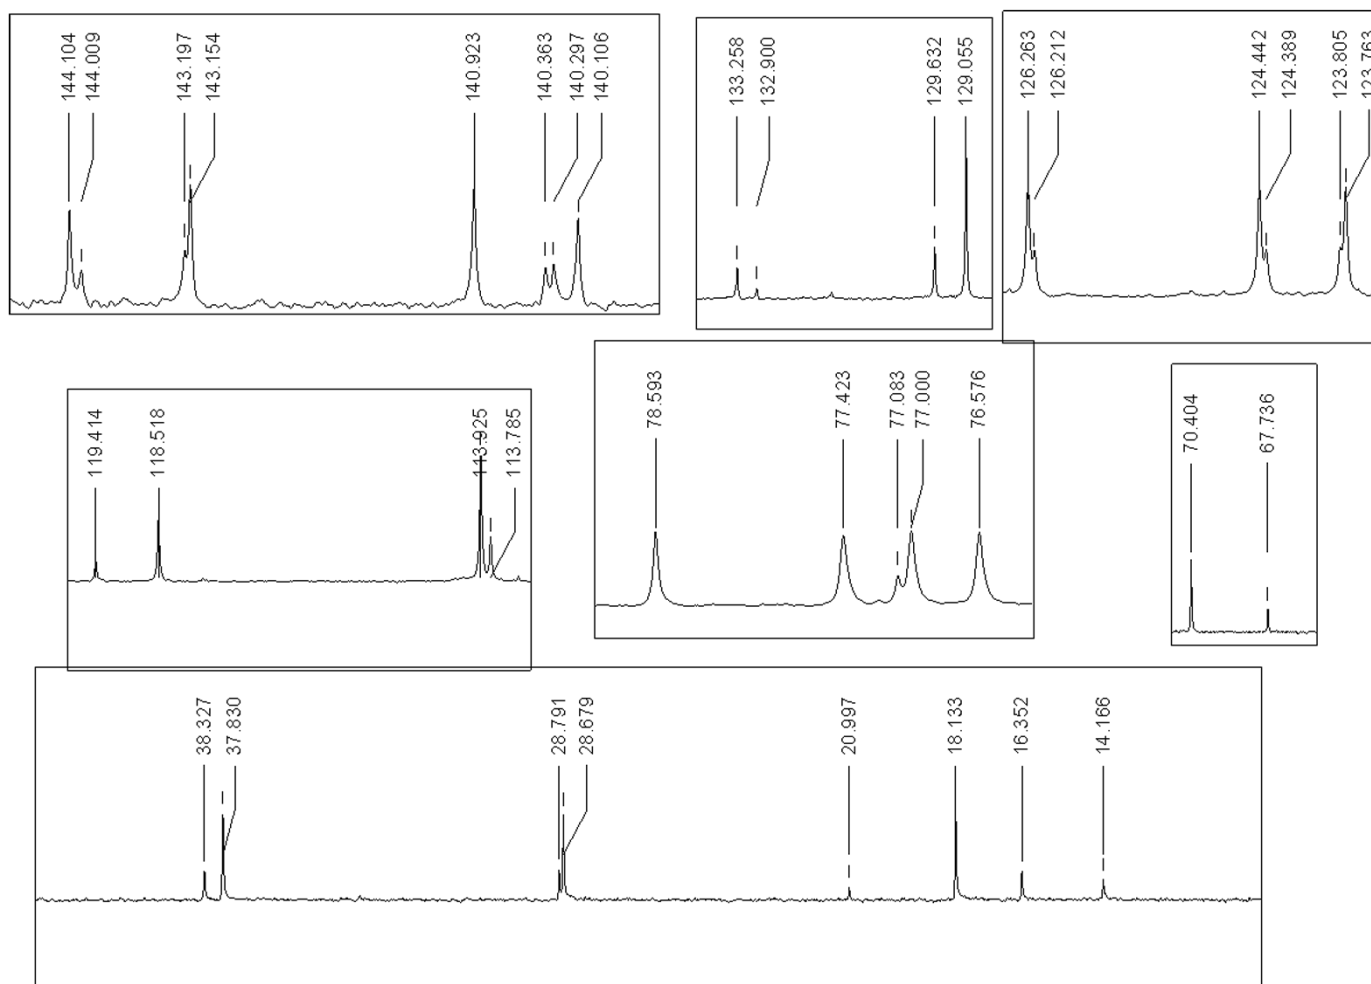

2D NOESY NMR of compound *cis*-**13b** (300 MHz, CDCl<sub>3</sub>)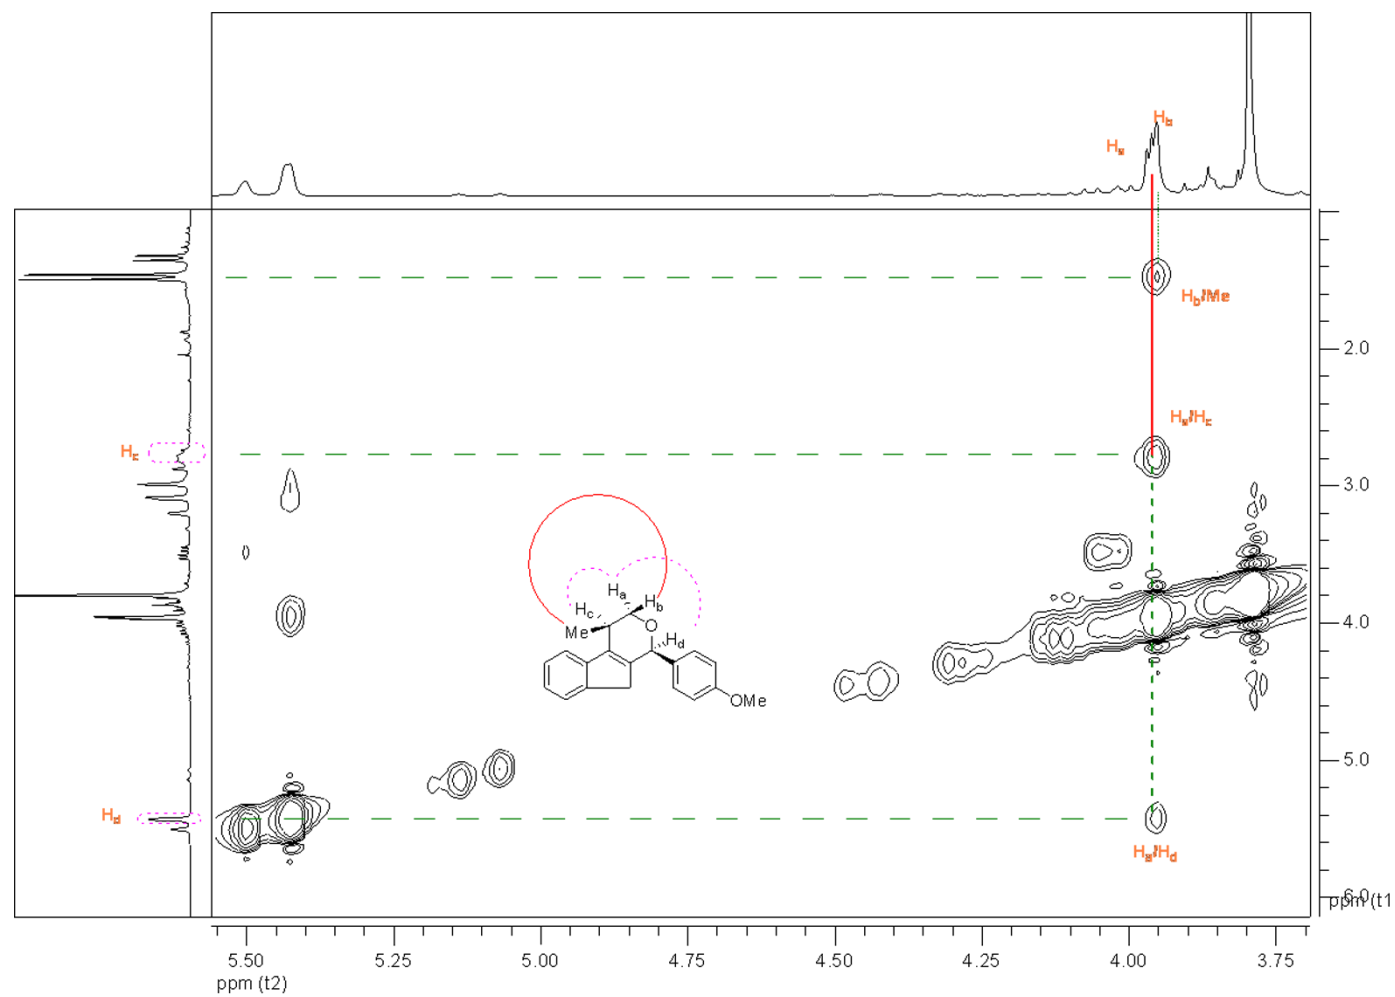

$^1\text{H}$ -NMR of compound *cis*-14c (200 MHz,  $\text{CDCl}_3$ )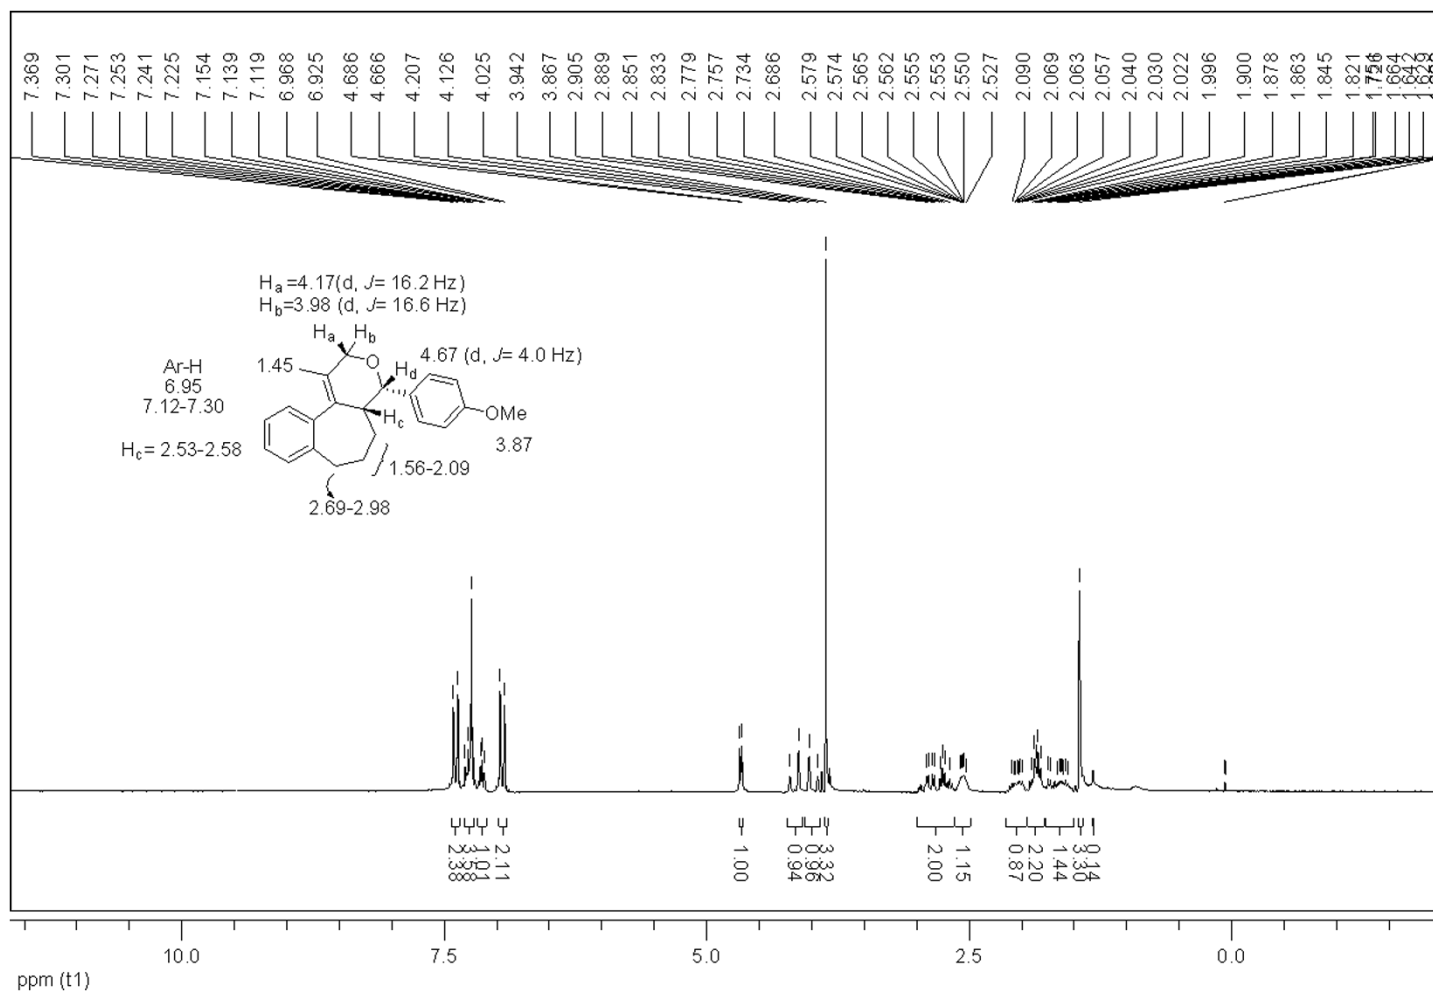

$^1\text{H}$ -NMR of compound *cis*-14c (200 MHz,  $\text{CDCl}_3$ )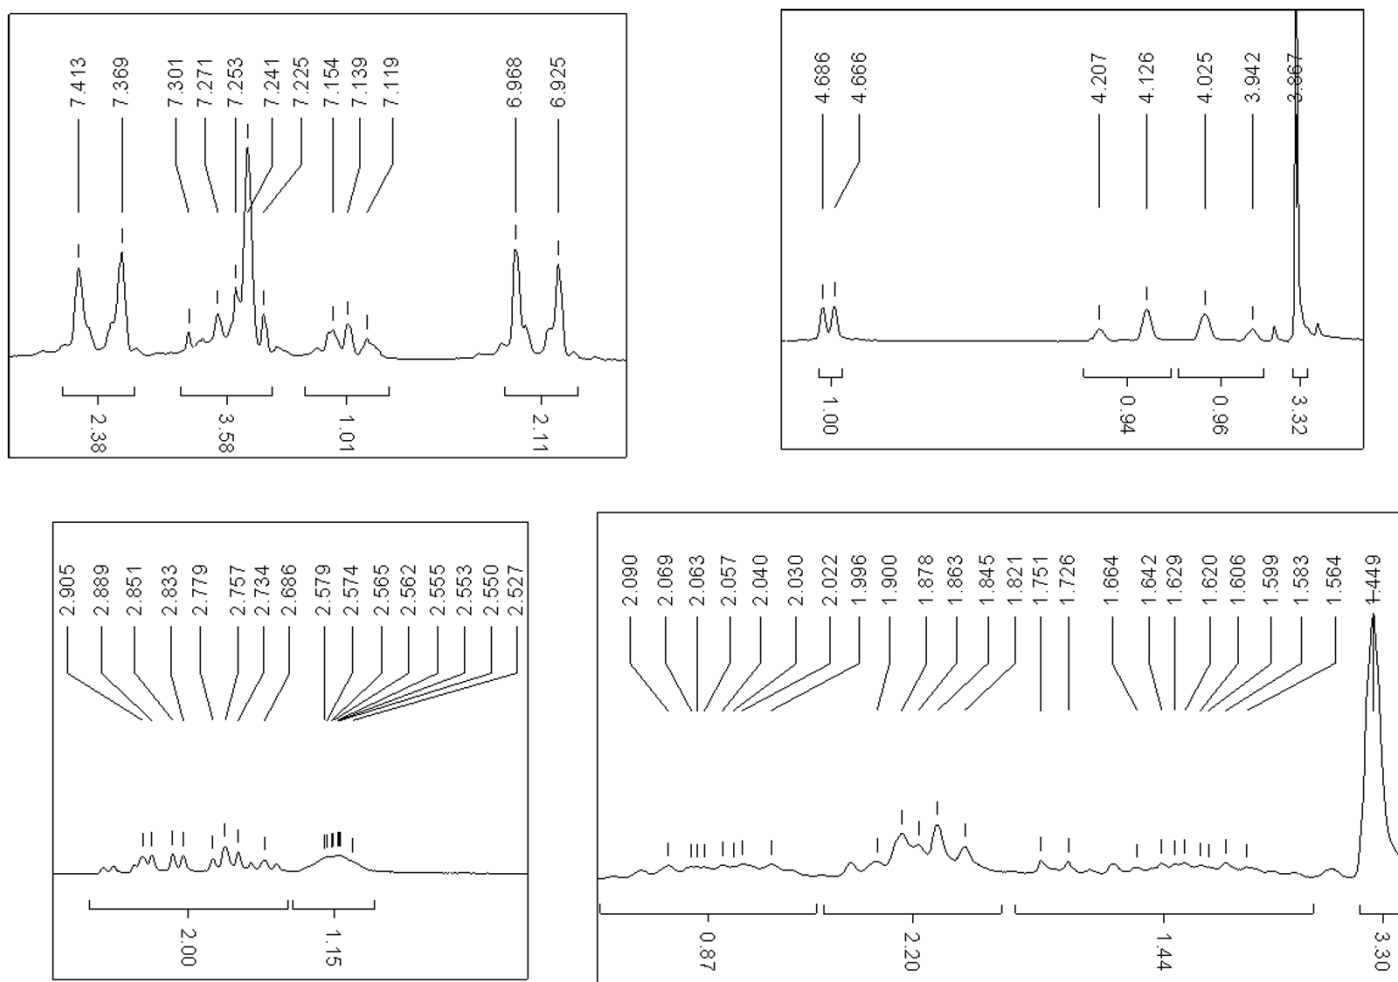

$^{13}\text{C}$ -NMR of compound *cis*-**14c** (50 MHz,  $\text{CDCl}_3$ )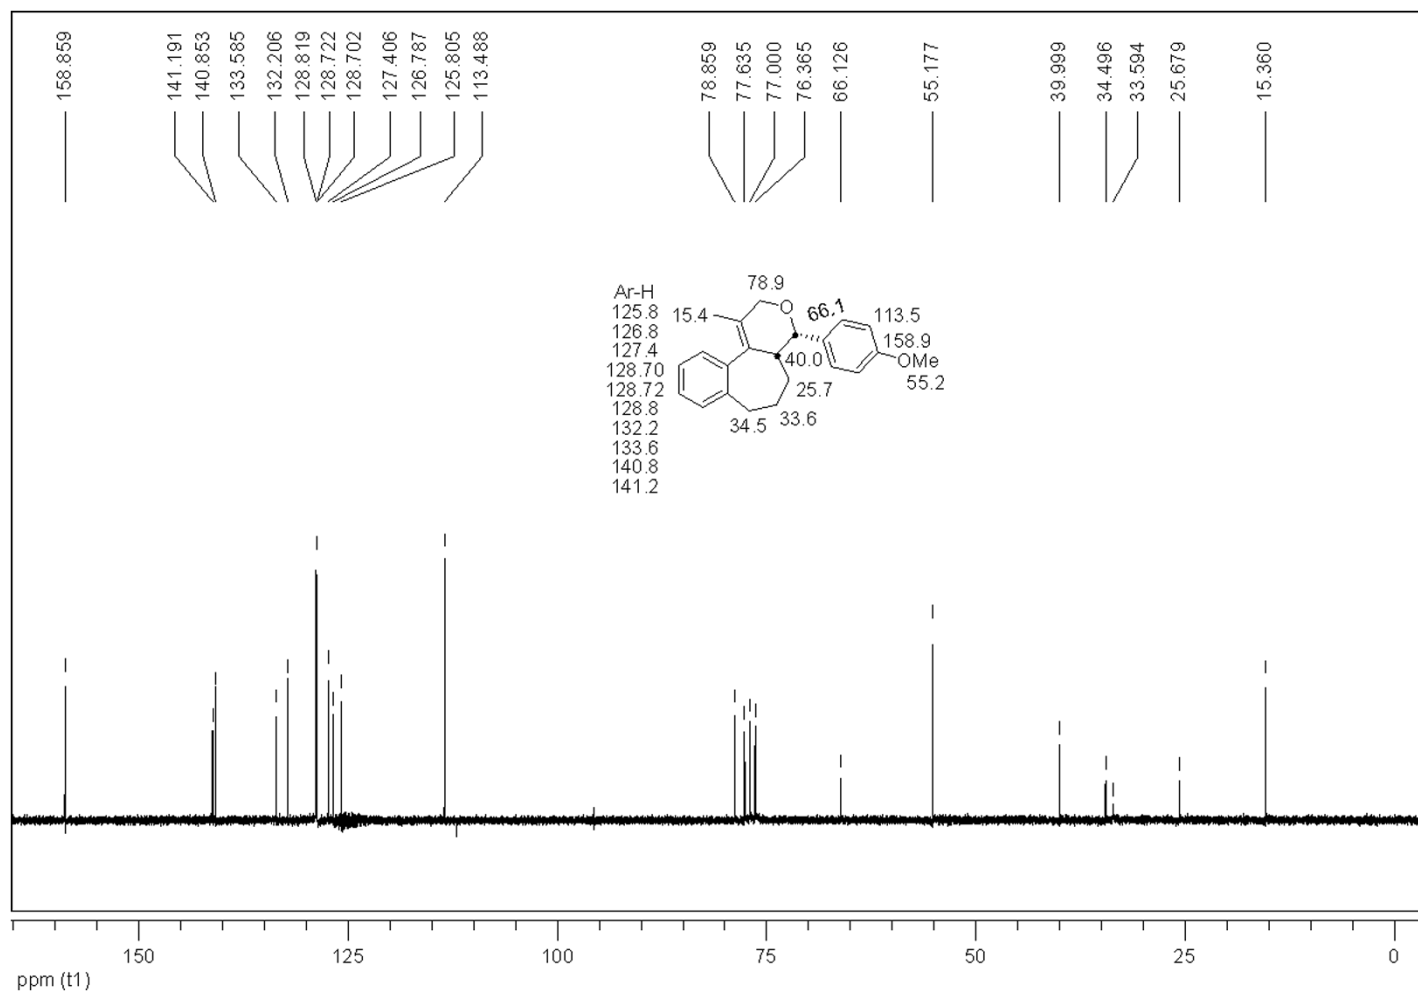

2D NOESY NMR of compound *cis*-**14c** (300 MHz, CDCl<sub>3</sub>)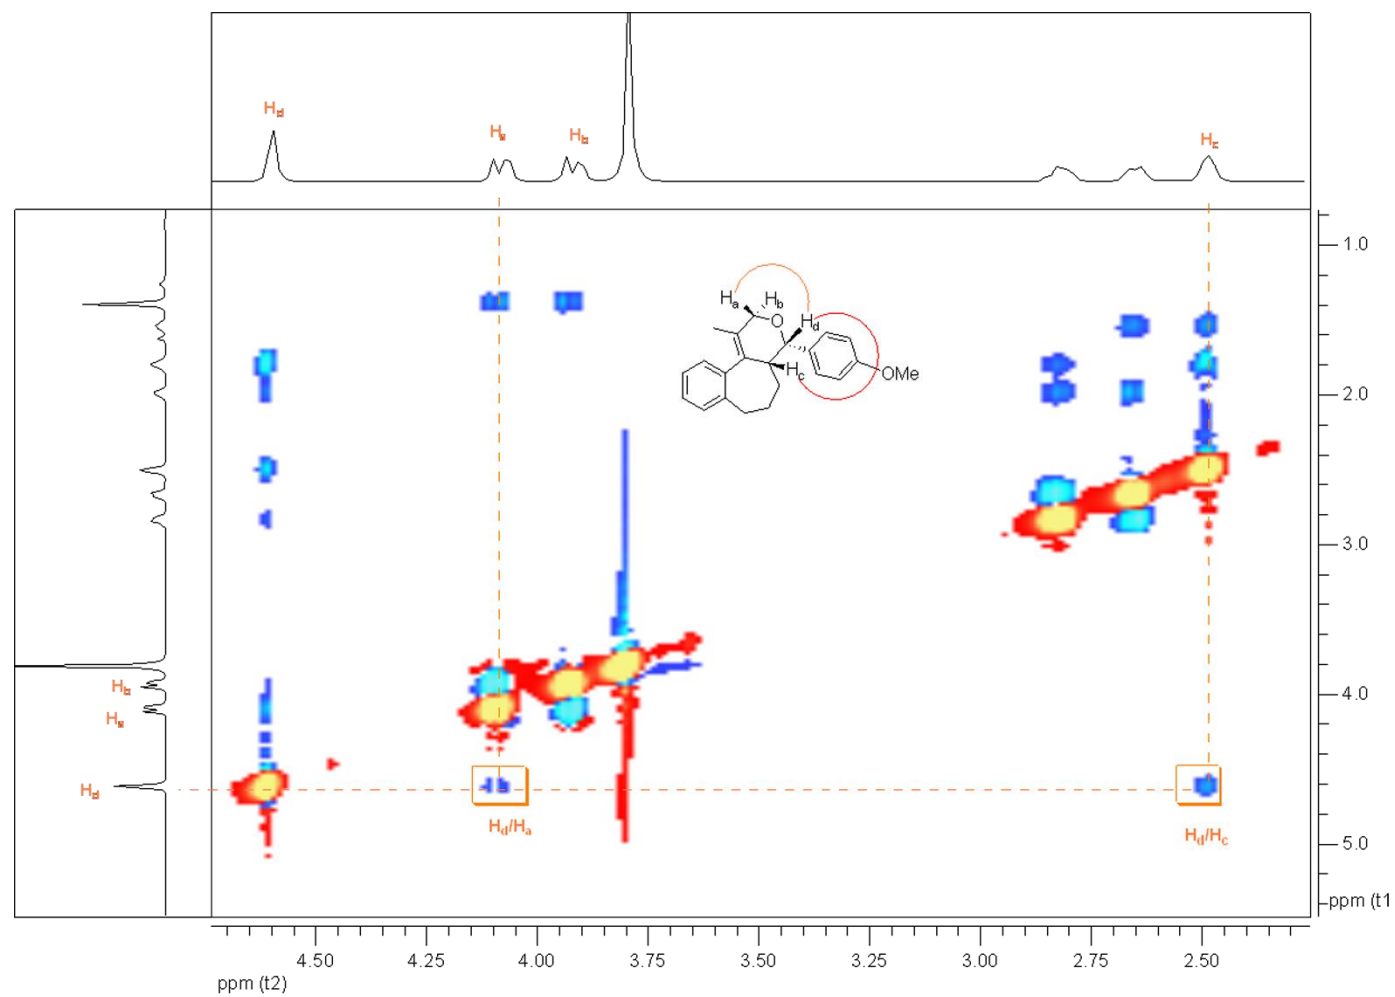

$^1\text{H}$ -NMR of compound *trans*-14c (200 MHz,  $\text{CDCl}_3$ )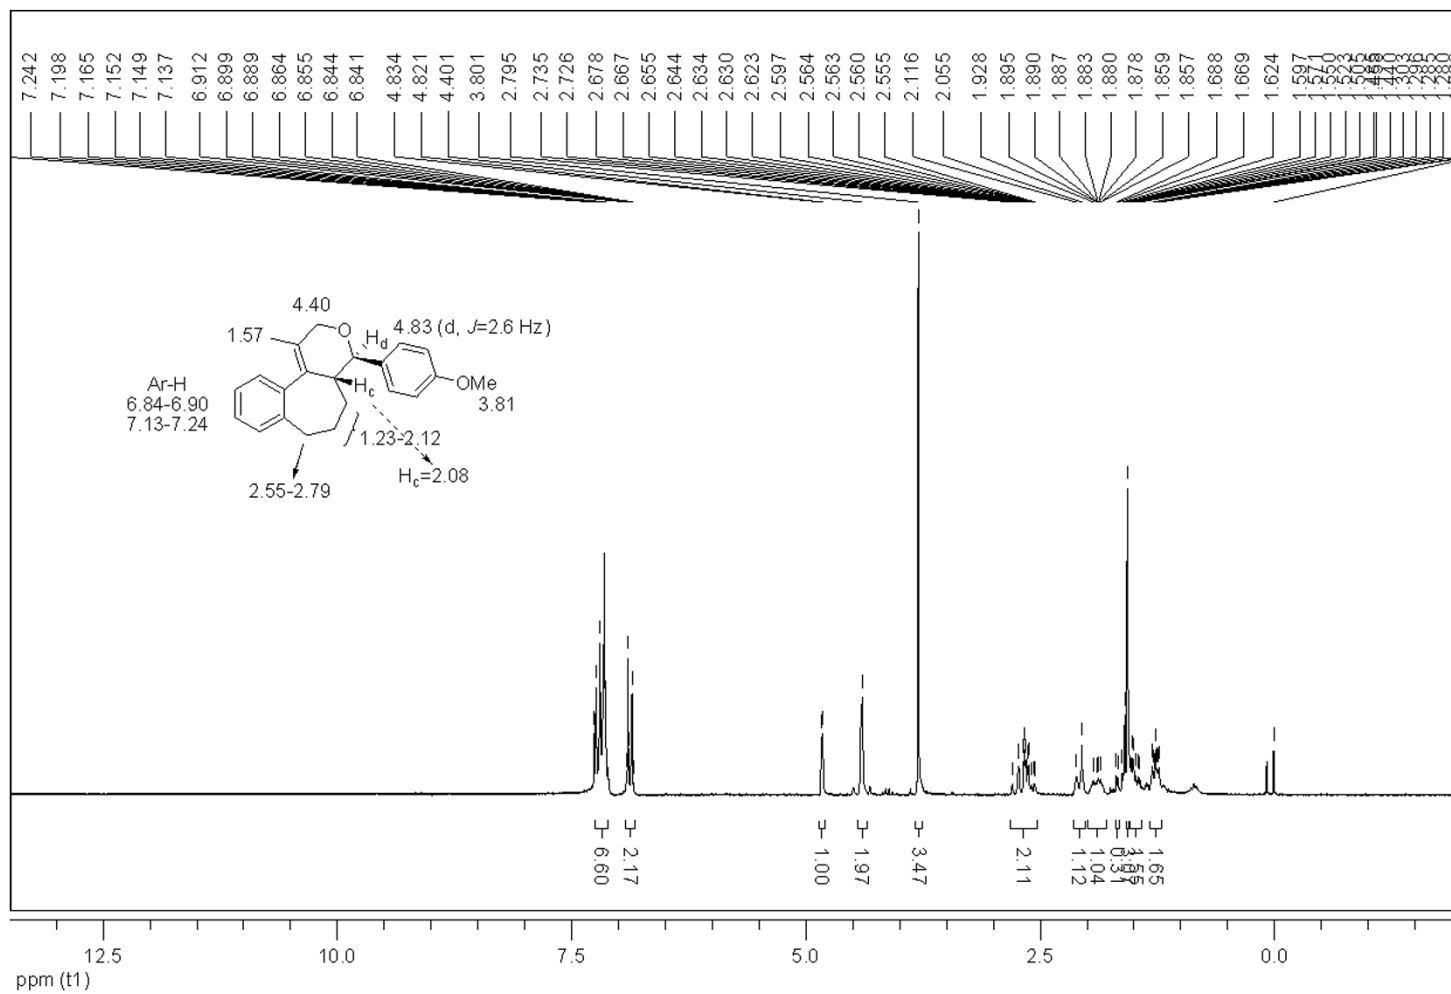

$^1\text{H}$ -NMR of compound *trans*-**14c** (200 MHz,  $\text{CDCl}_3$ )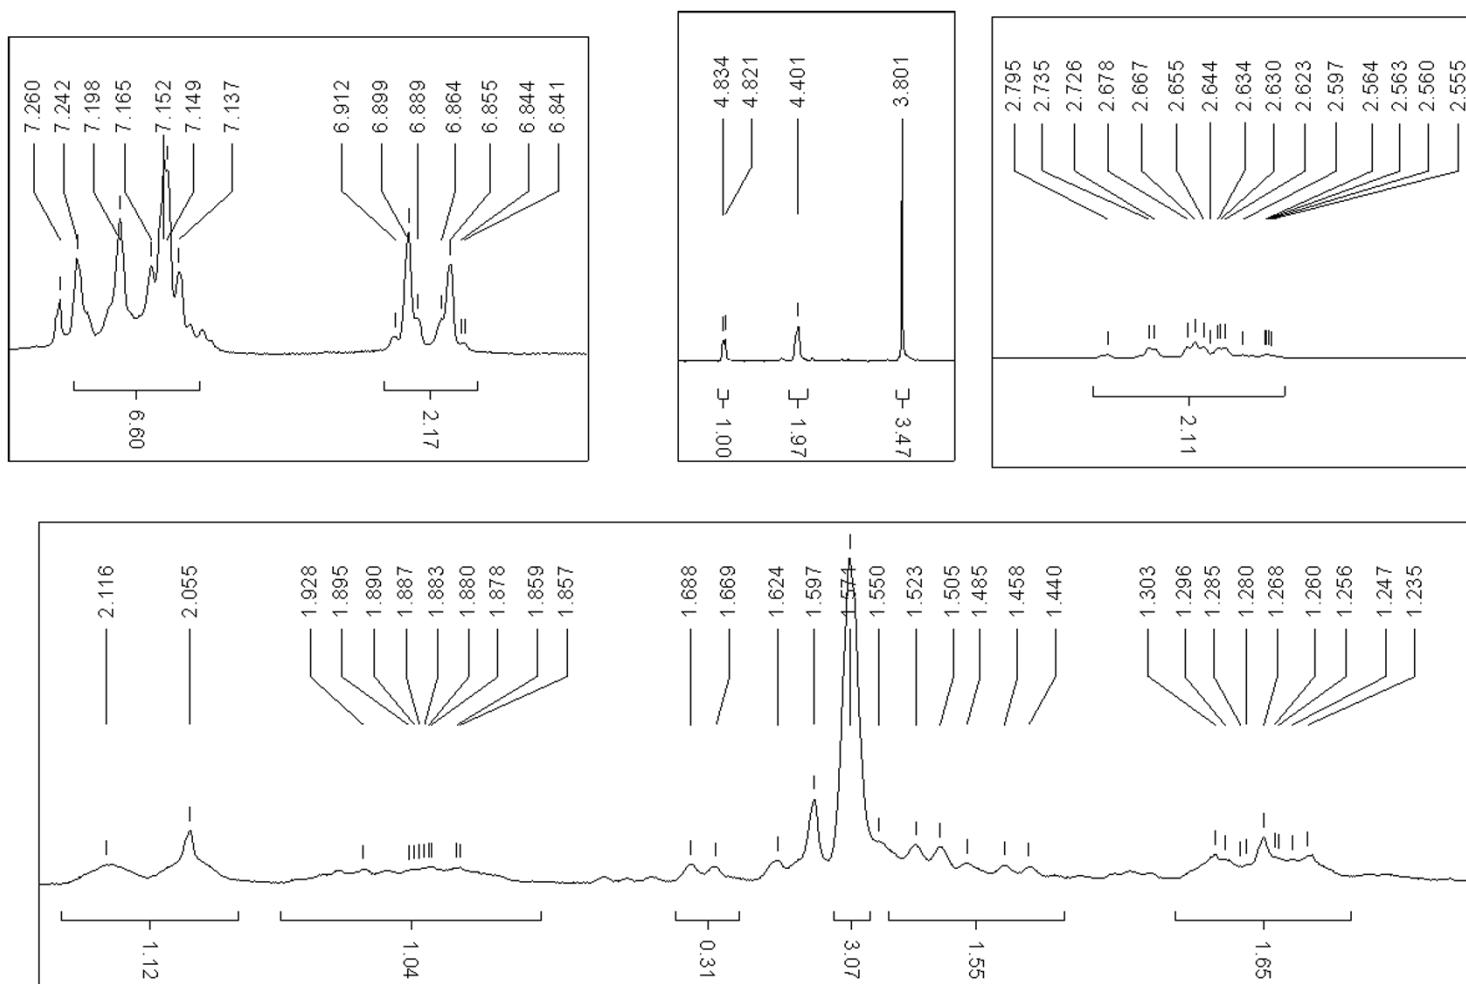

$^{13}\text{C}$ -NMR of compound *trans*-**14c** (50 MHz,  $\text{CDCl}_3$ )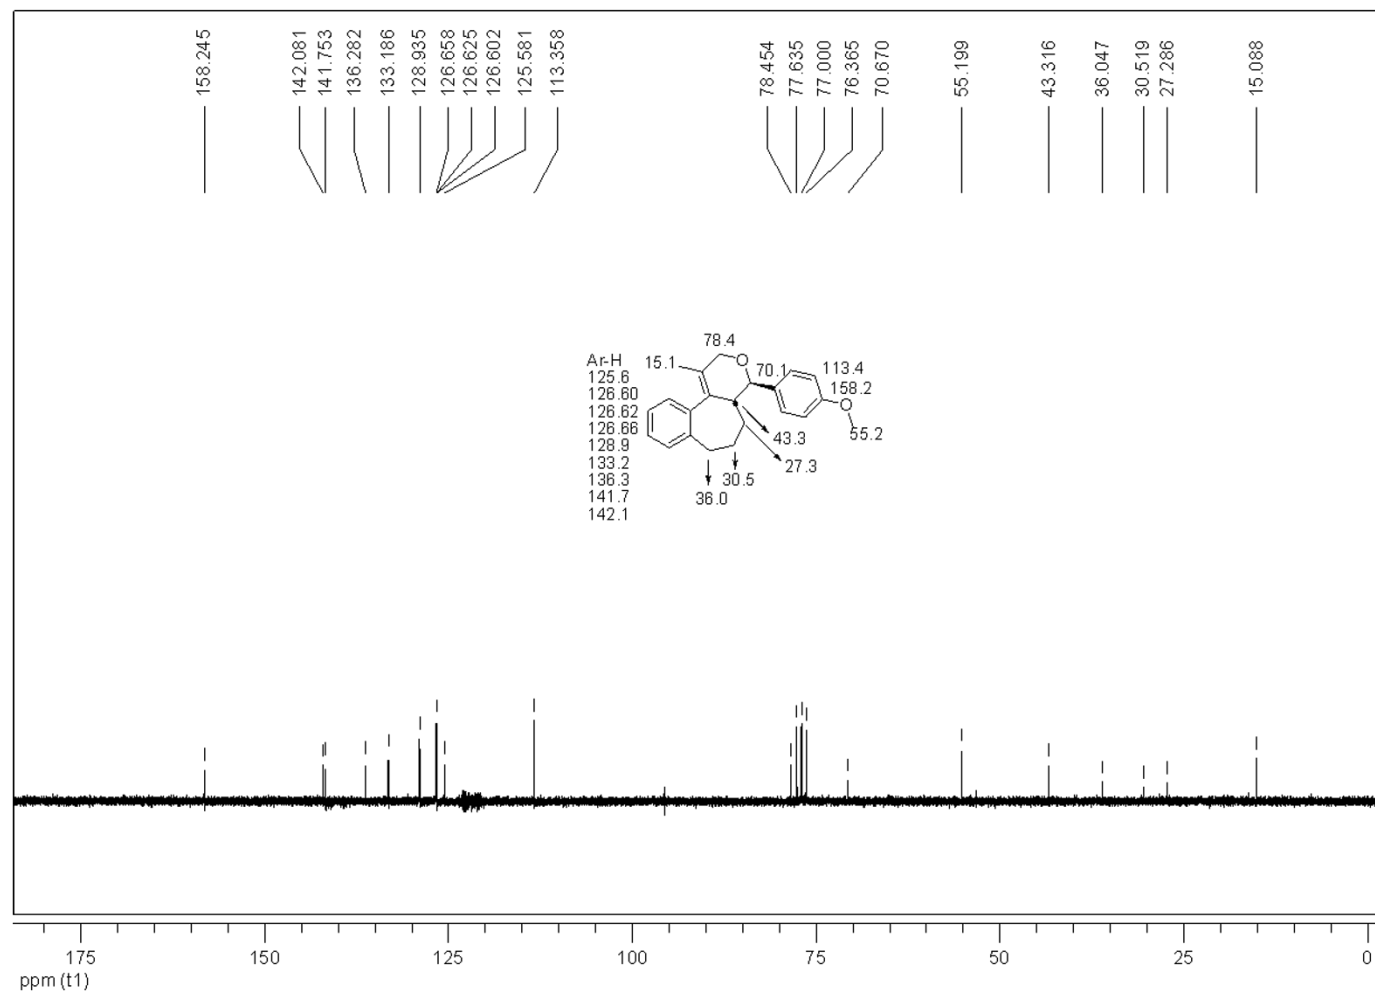

$^1\text{H}$ -NMR of compound **13d** (200 MHz,  $\text{CDCl}_3$ )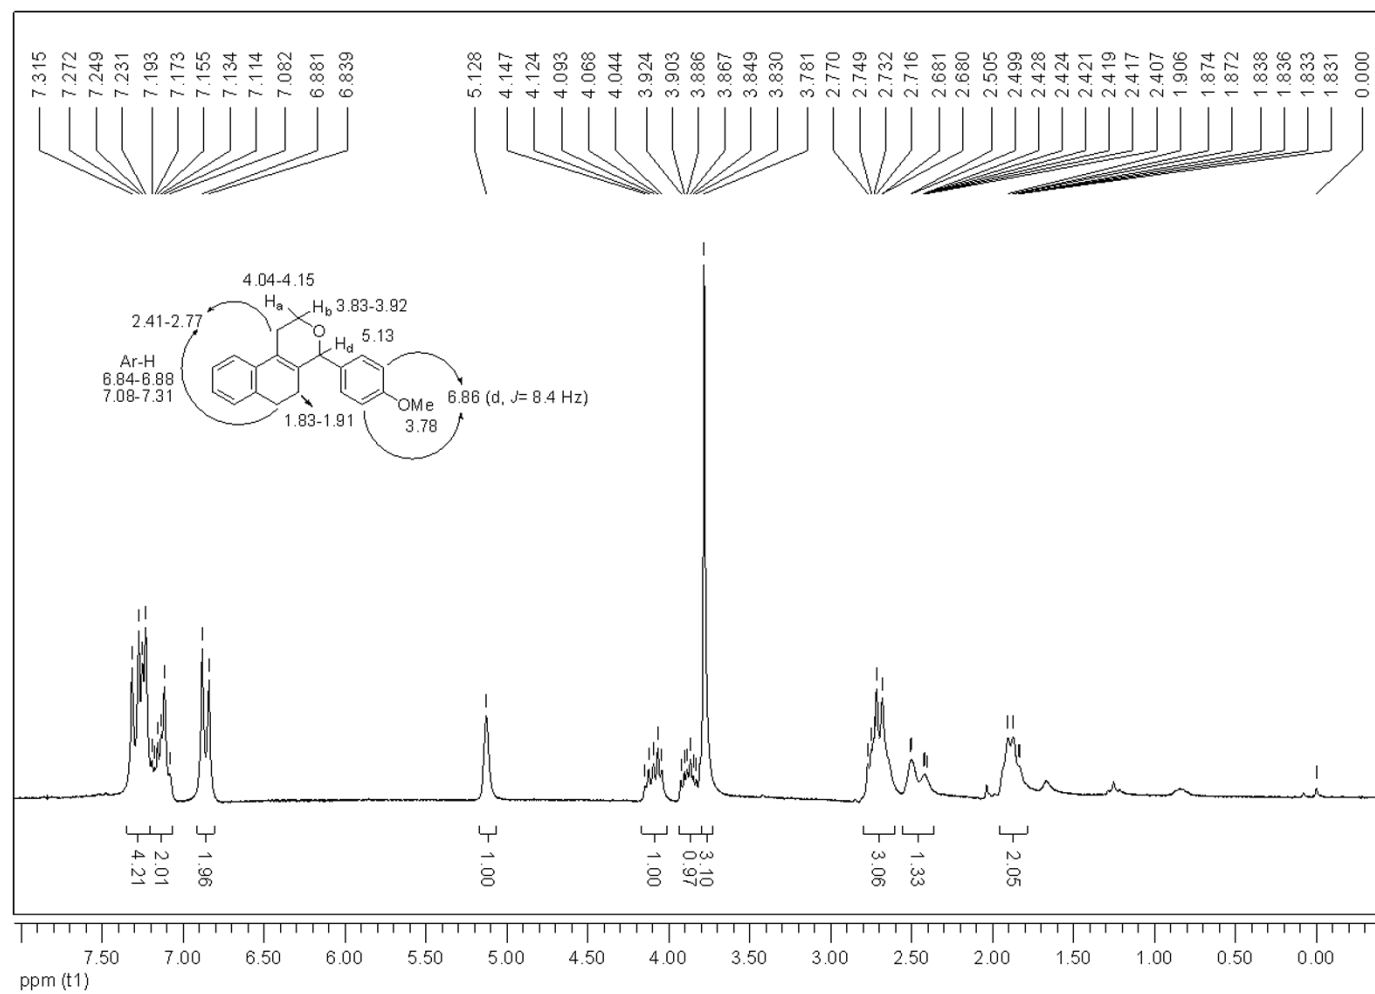

$^1\text{H}$ -NMR of compound **13d** (200 MHz,  $\text{CDCl}_3$ )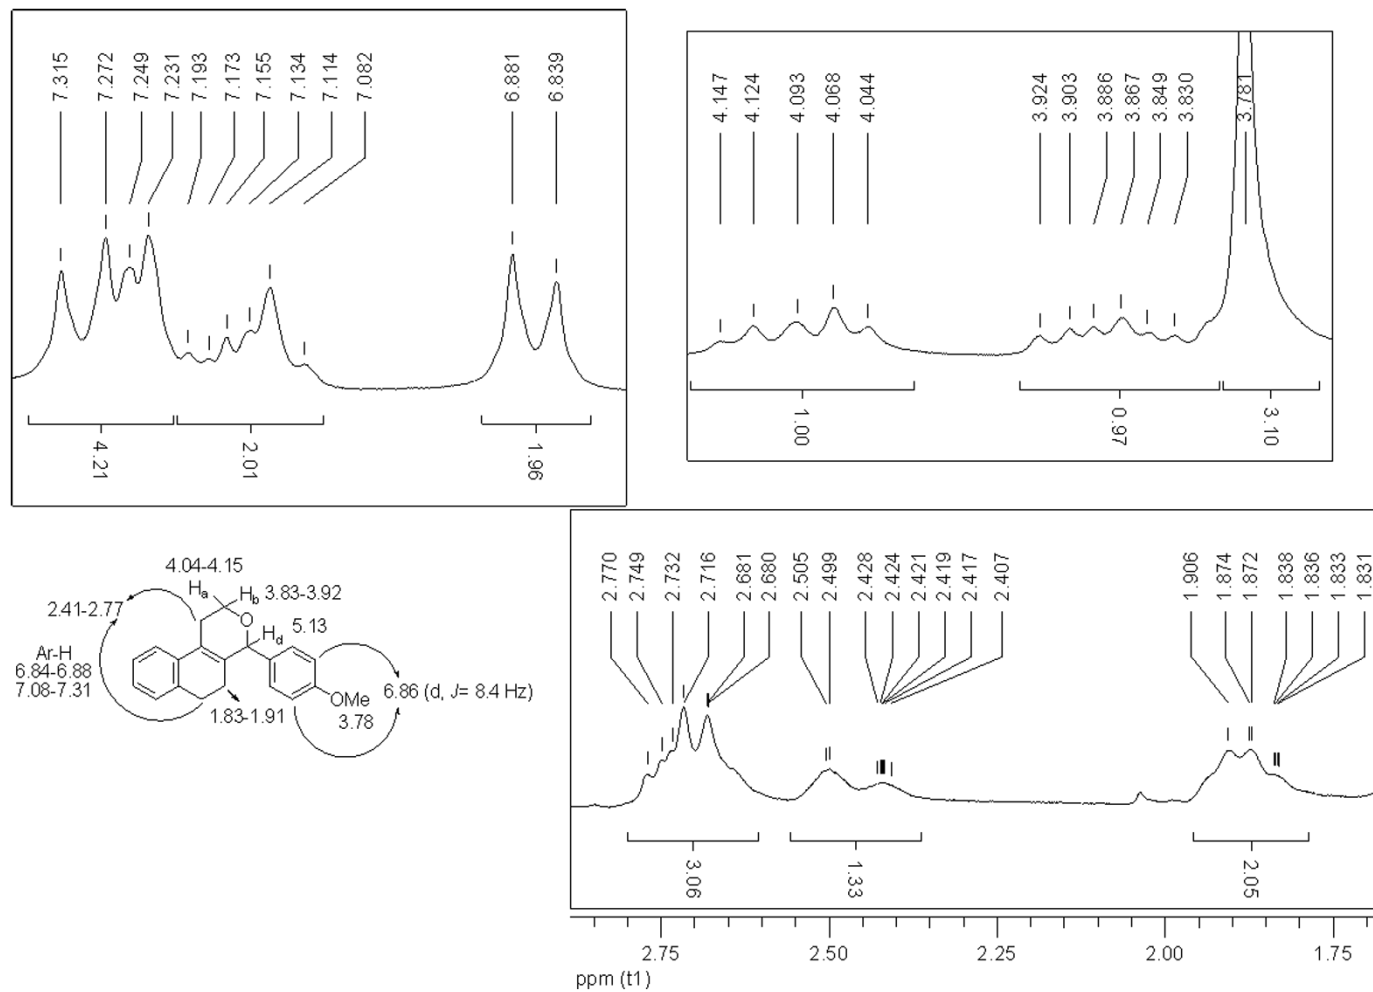

$^{13}\text{C}$ -NMR of compound **13d** (50 MHz,  $\text{CDCl}_3$ )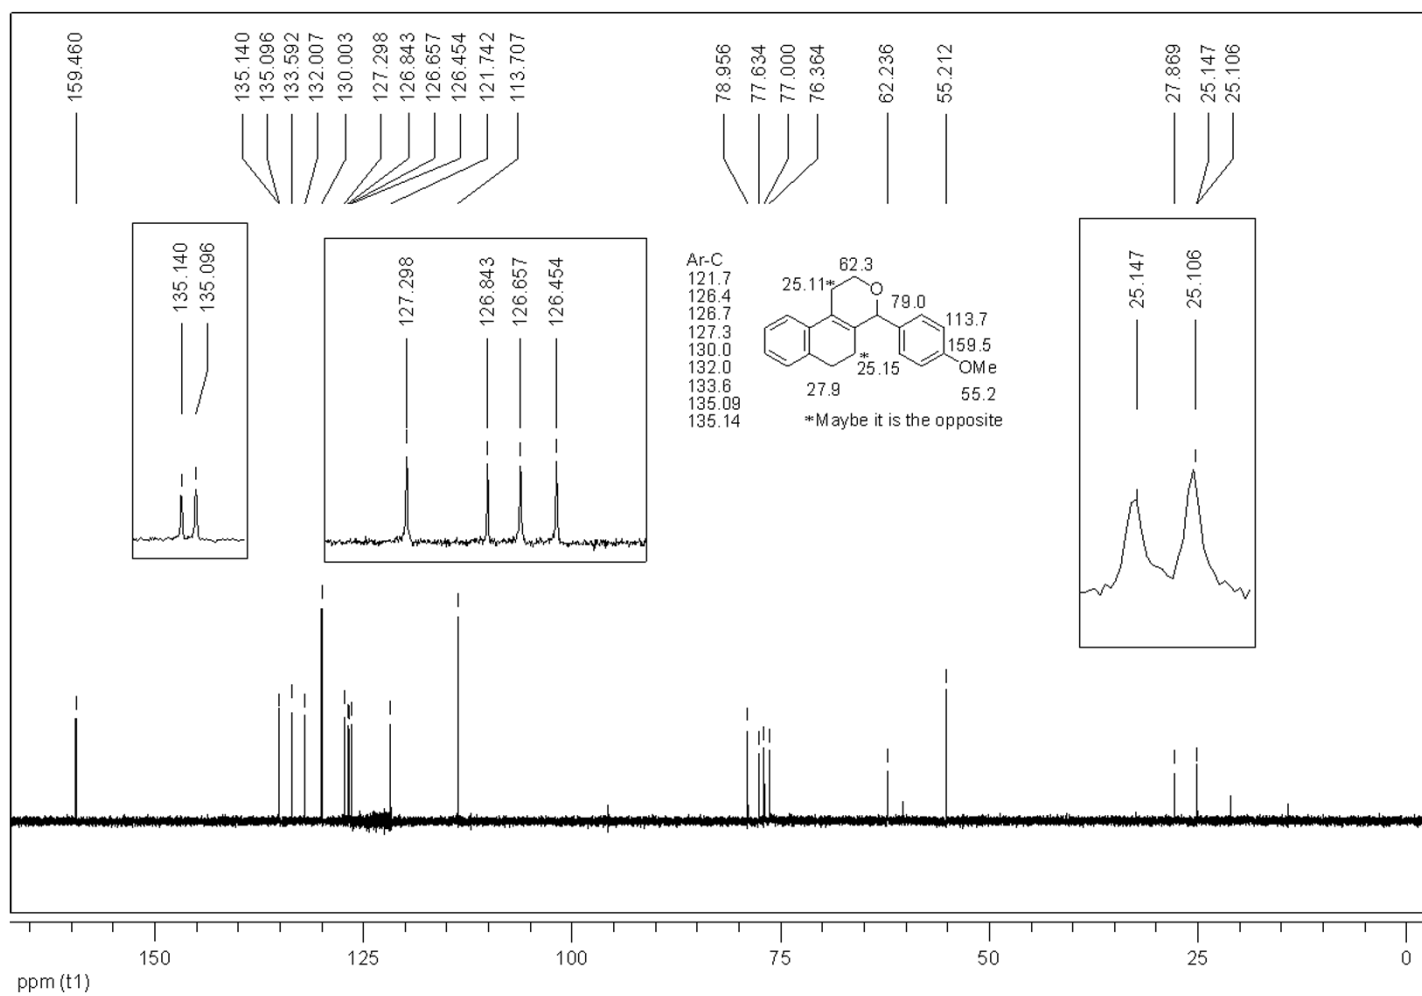

$^1\text{H}$ -NMR of compound *cis*-13e (200 MHz,  $\text{CDCl}_3$ )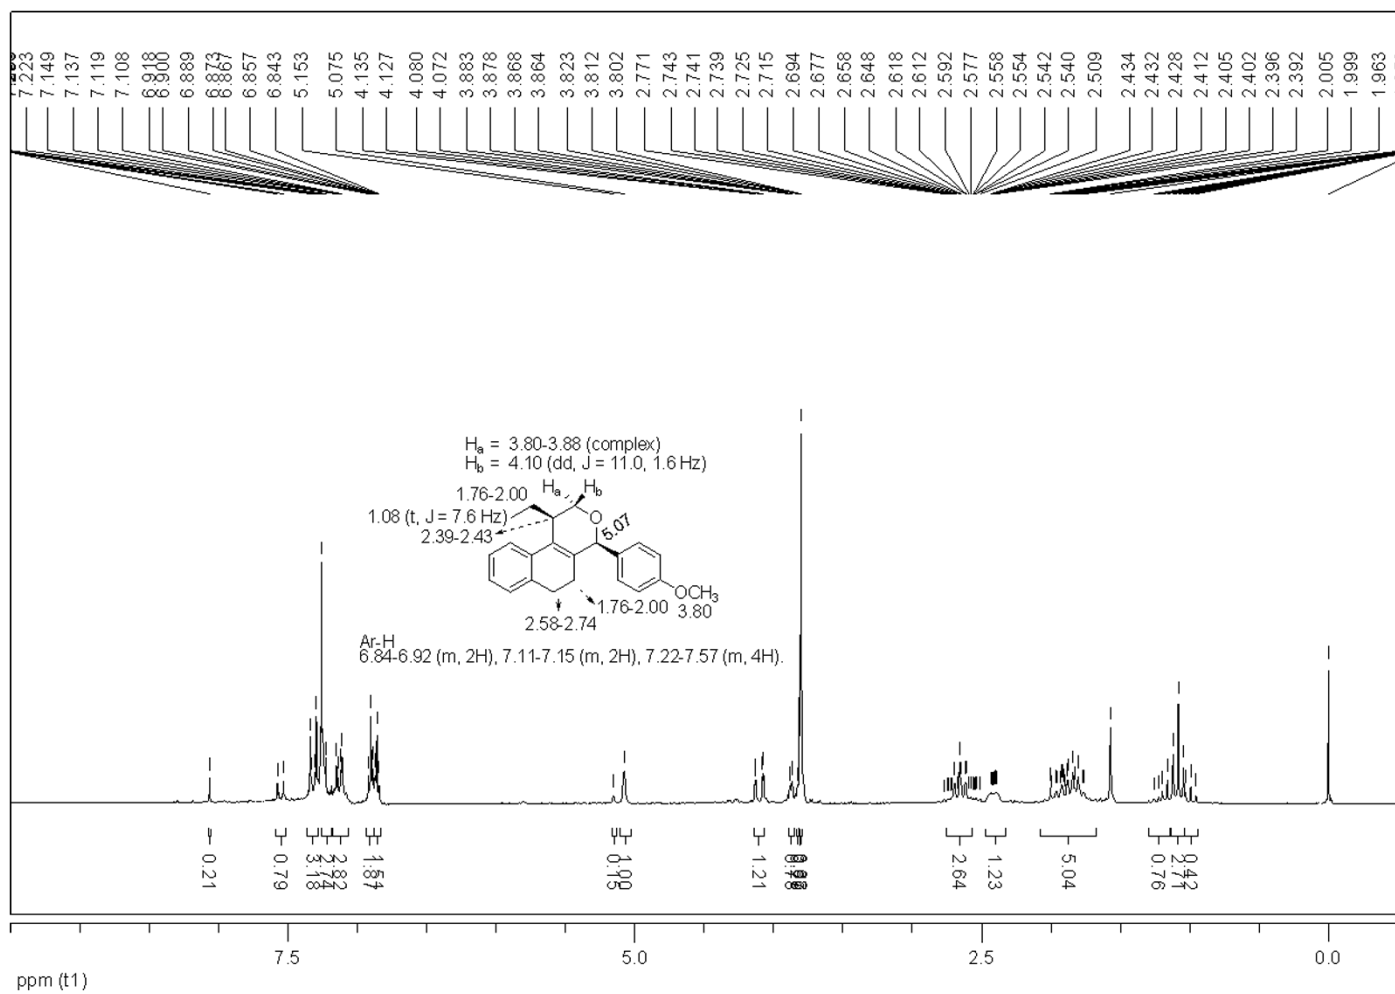

$^1\text{H}$ -NMR of compound *cis*-13e (200 MHz,  $\text{CDCl}_3$ )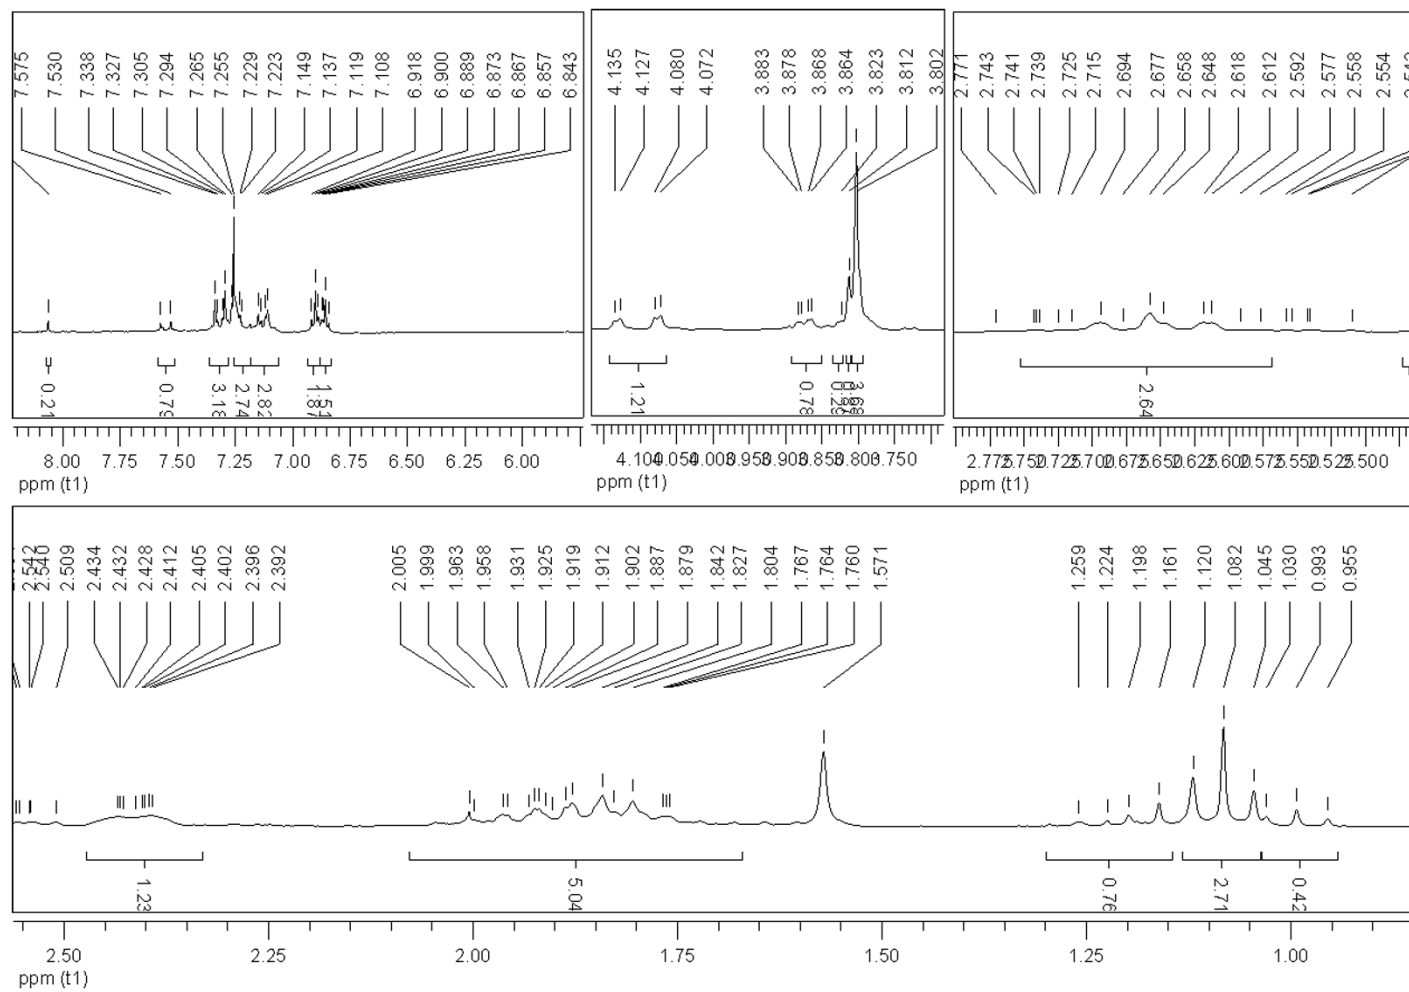

$^{13}\text{C}$ -NMR of compound *cis*-**13e** (50 MHz,  $\text{CDCl}_3$ )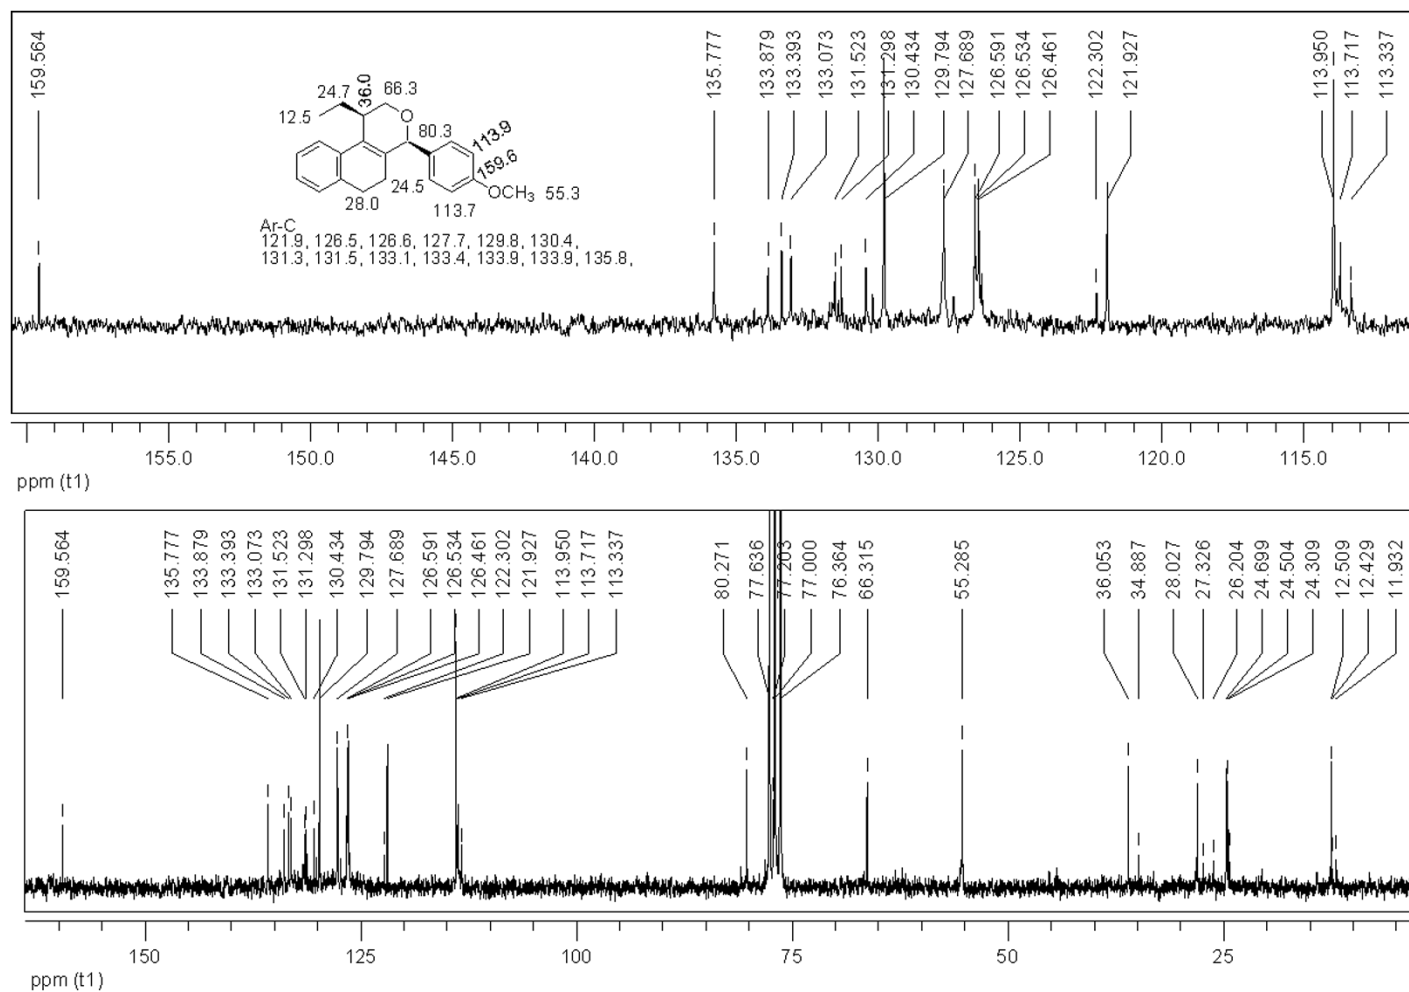

$^1\text{H}$ -NMR of compound *trans*-13e (200 MHz,  $\text{CDCl}_3$ )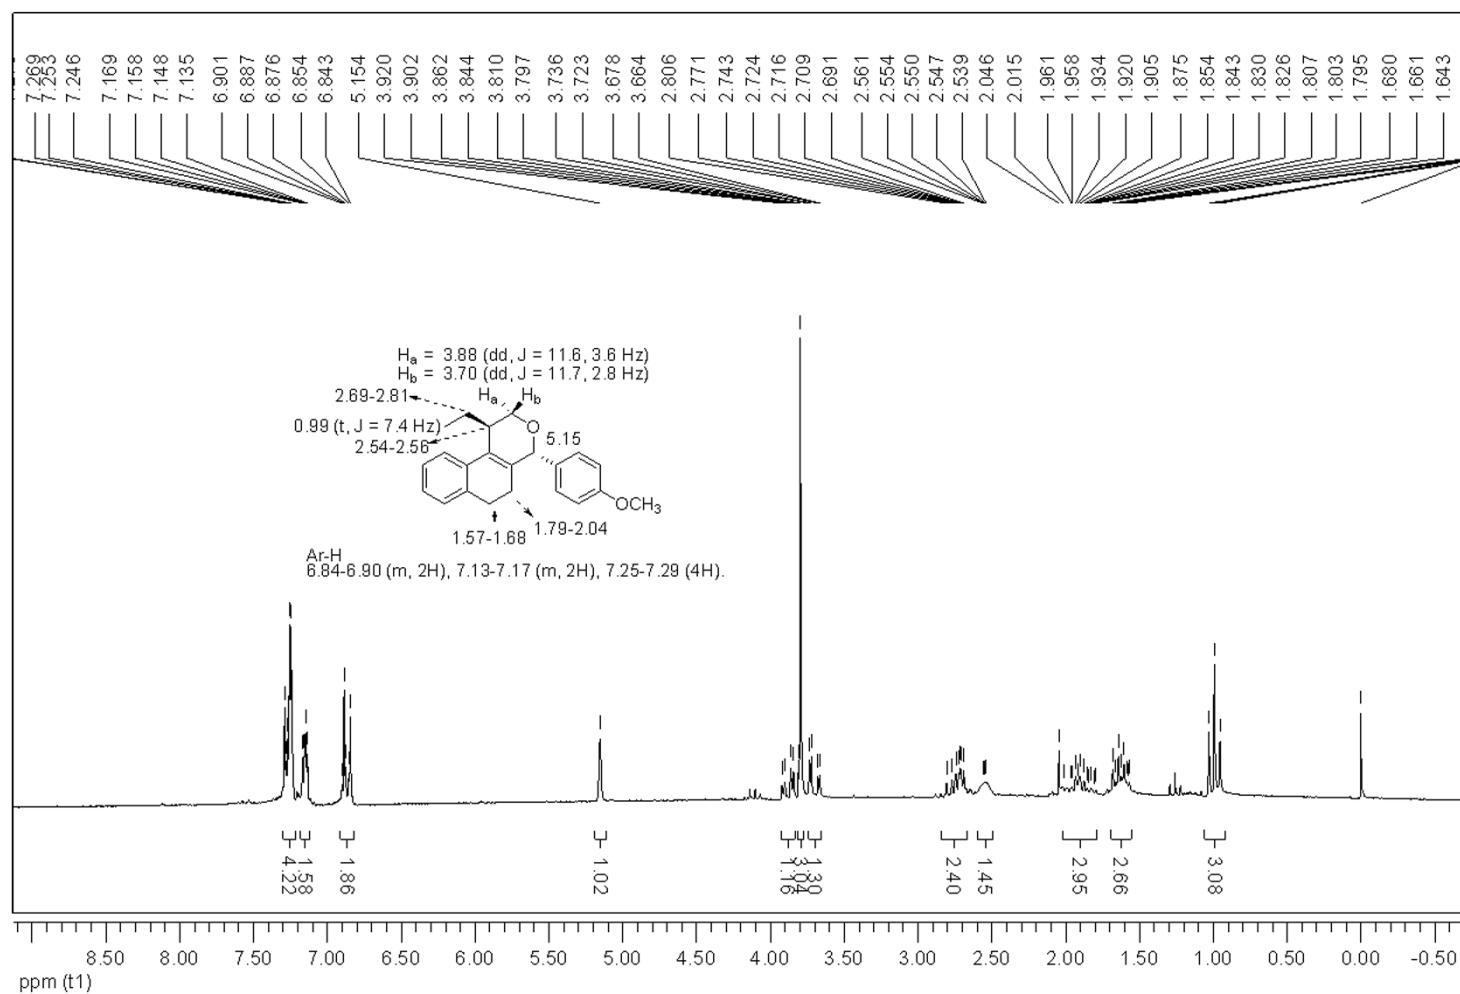

$^1\text{H}$ -NMR of compound *trans*-13e (200 MHz,  $\text{CDCl}_3$ )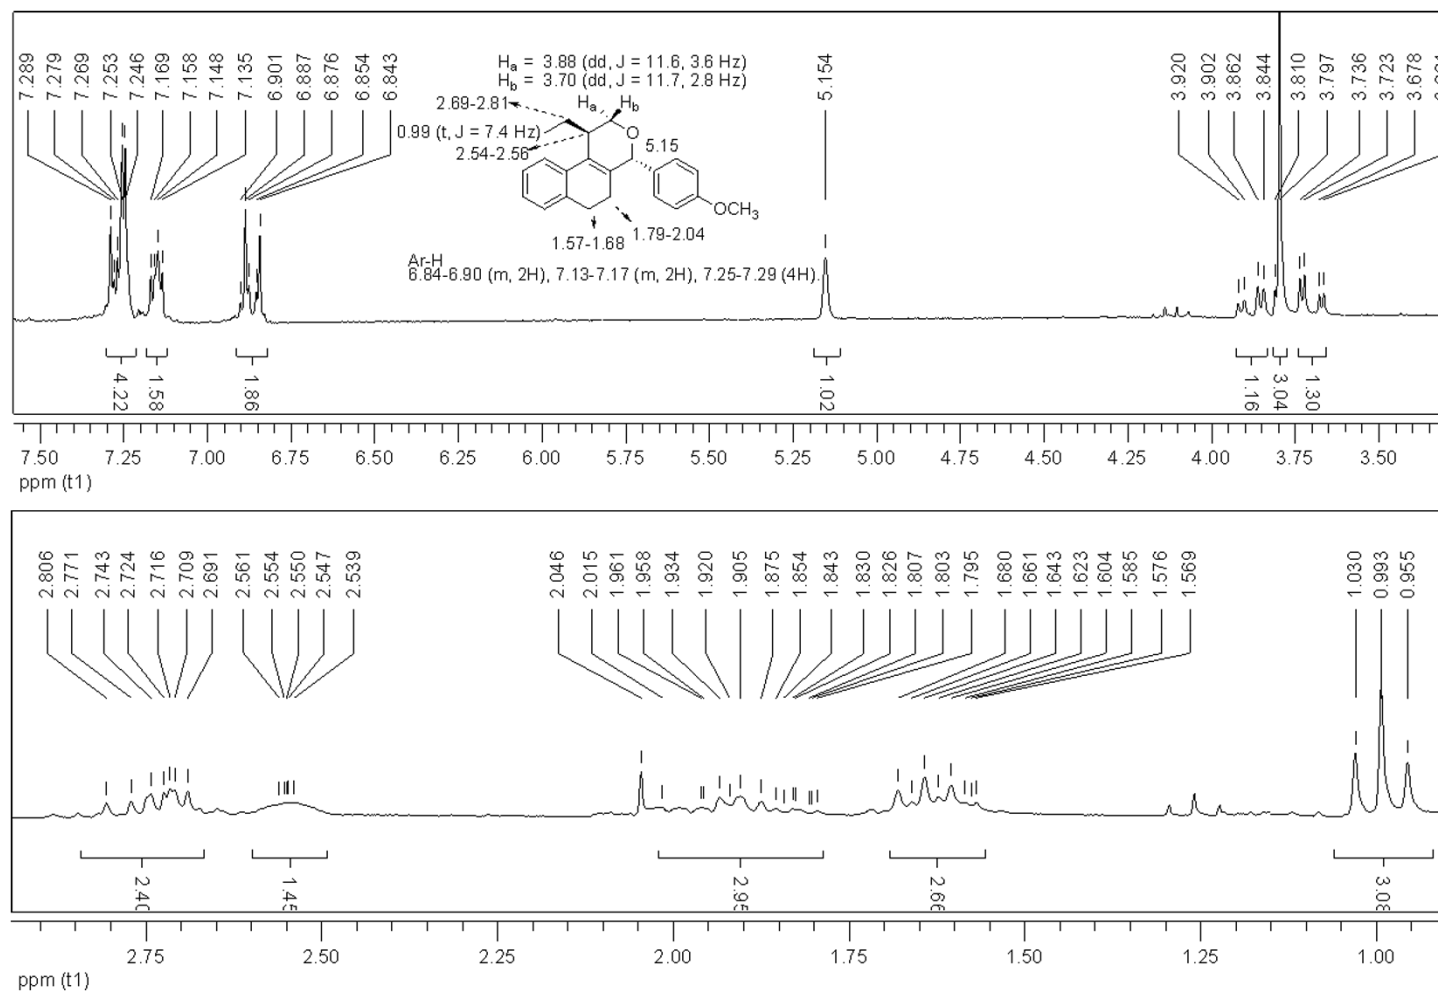

$^{13}\text{C}$ -NMR of compound *trans*-**13e** (50 MHz,  $\text{CDCl}_3$ )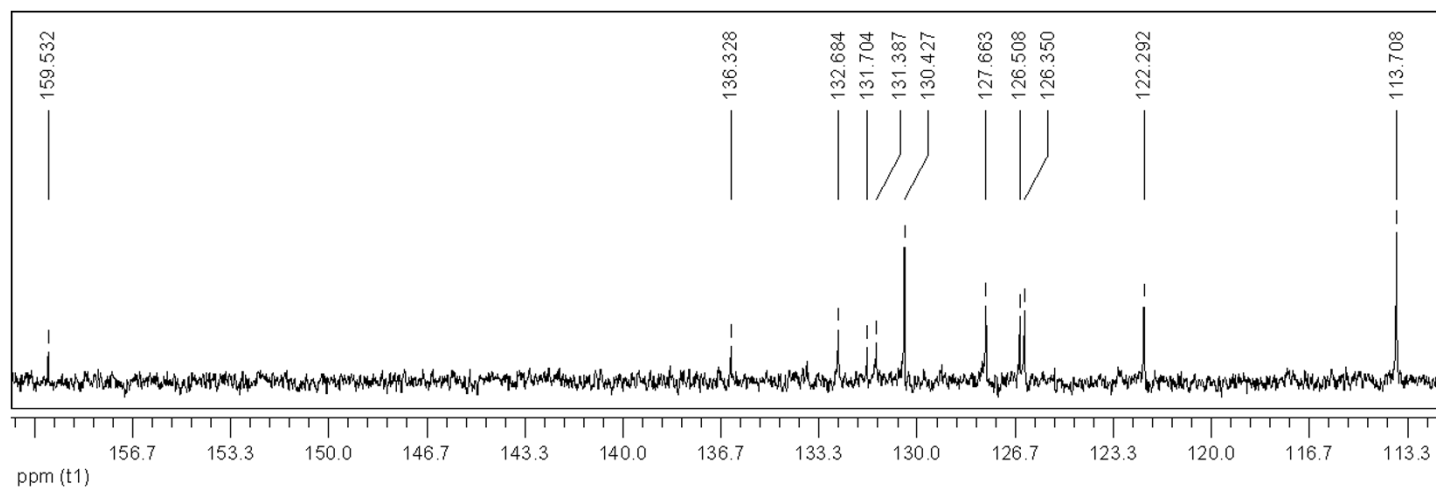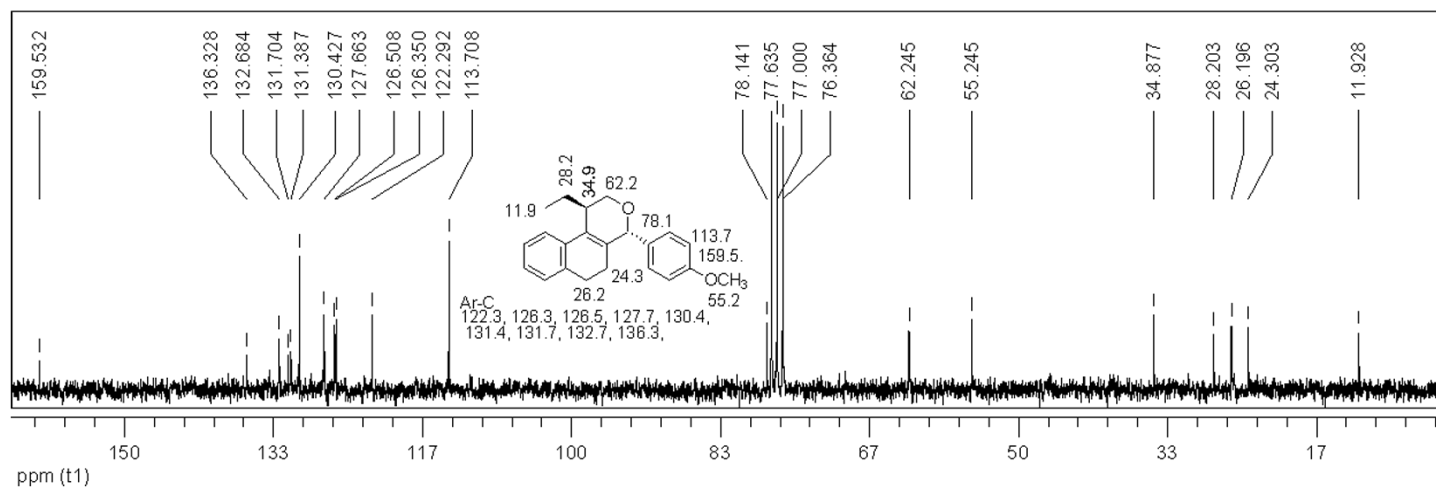

2D NOESY NMR of compound *trans*-13e (300 MHz, CDCl<sub>3</sub>)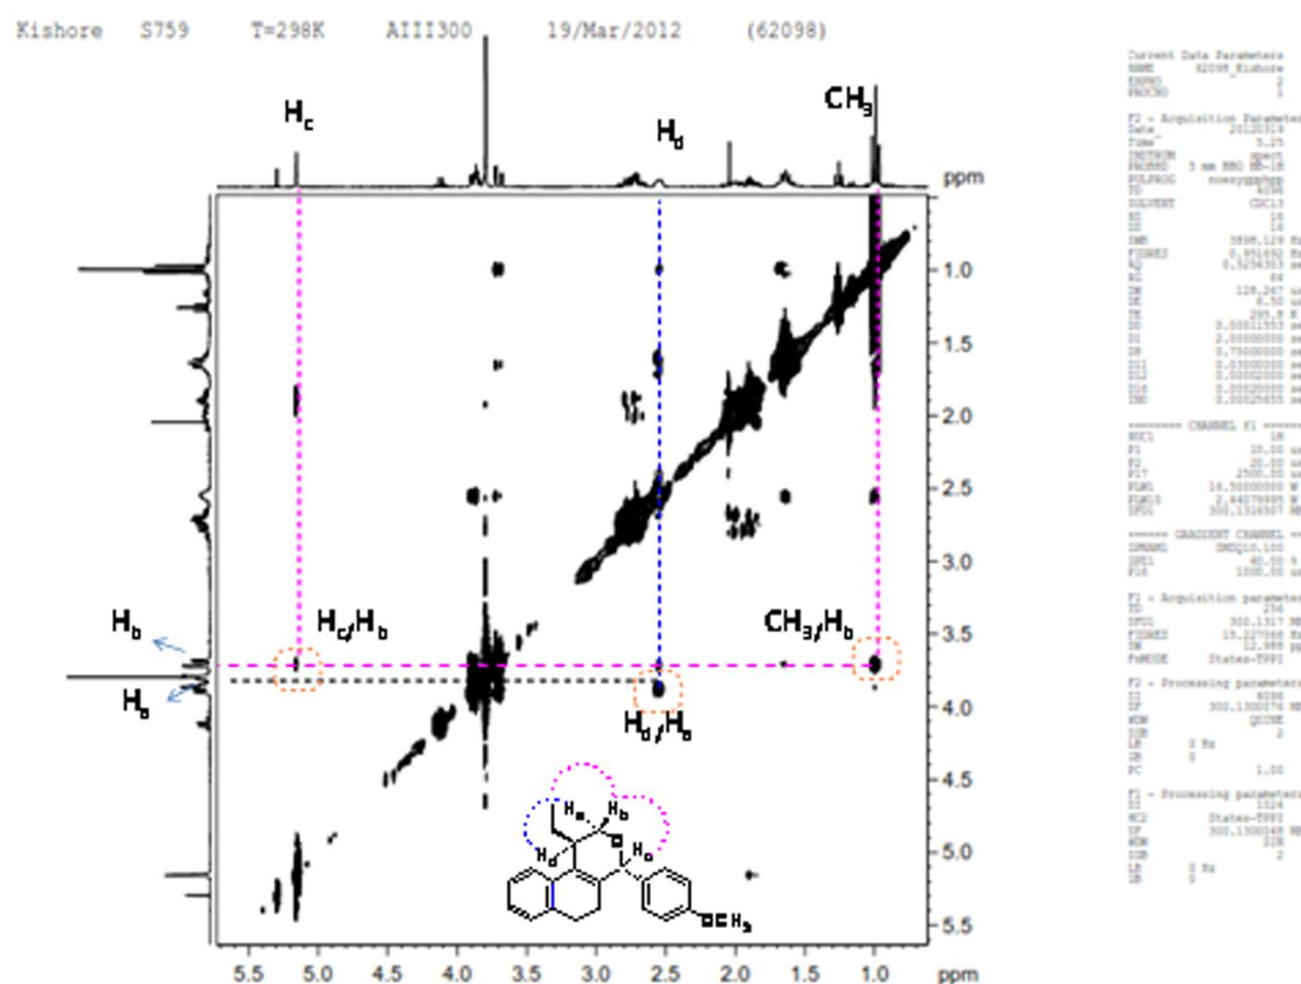

$^1\text{H}$ -NMR of compound *cis*-**15e** (200 MHz,  $\text{CDCl}_3$ )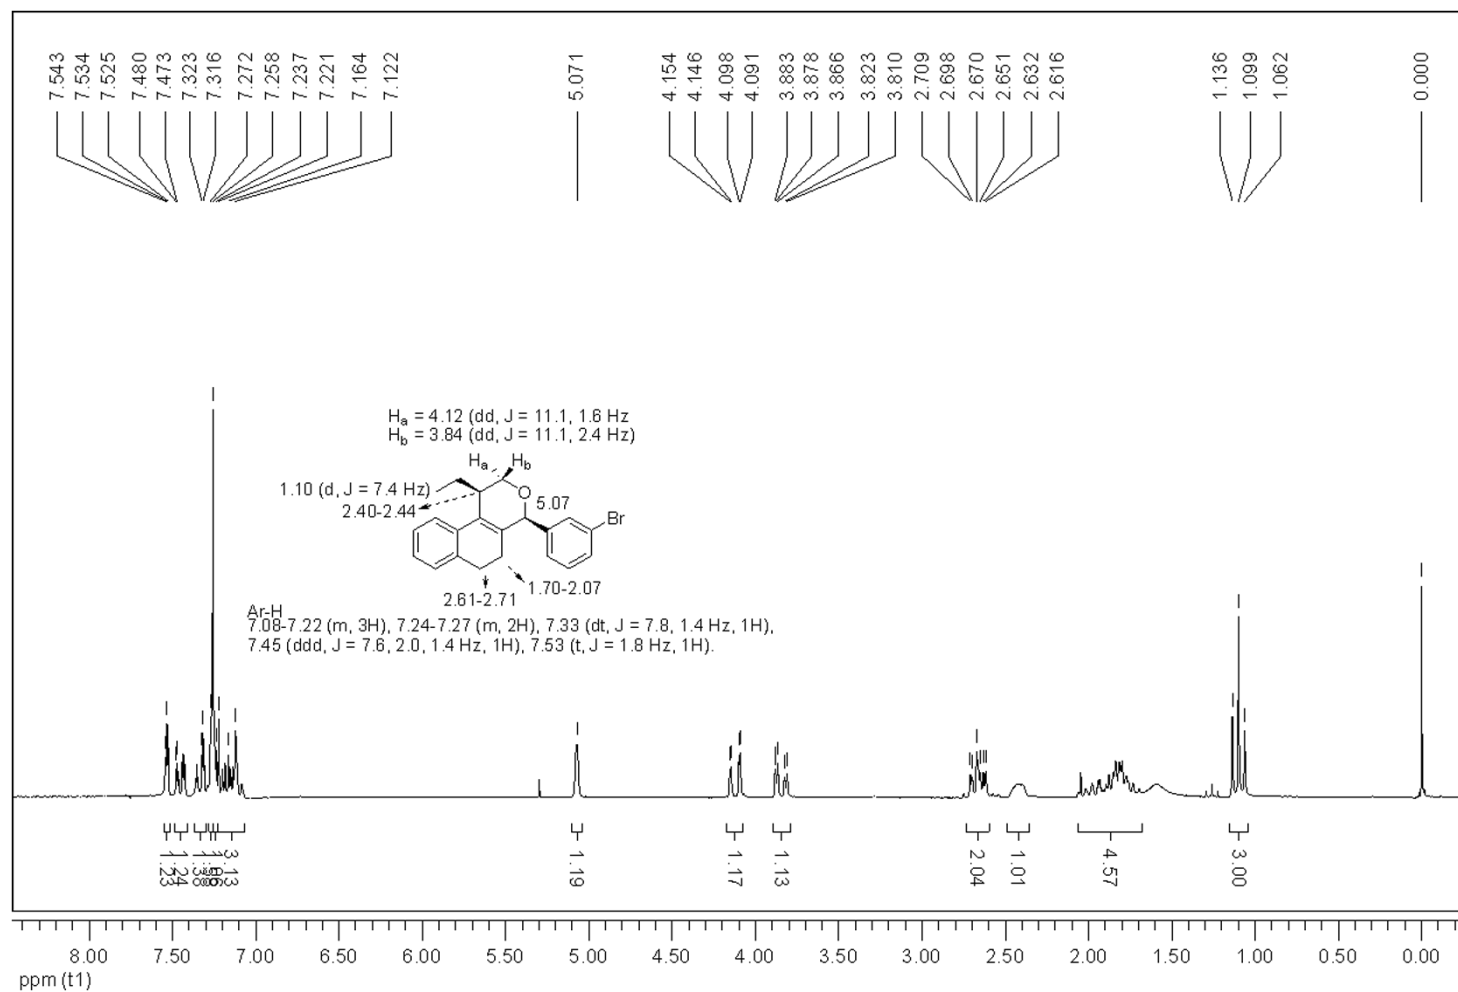

$^1\text{H}$ -NMR of compound *cis*-15e (200 MHz,  $\text{CDCl}_3$ )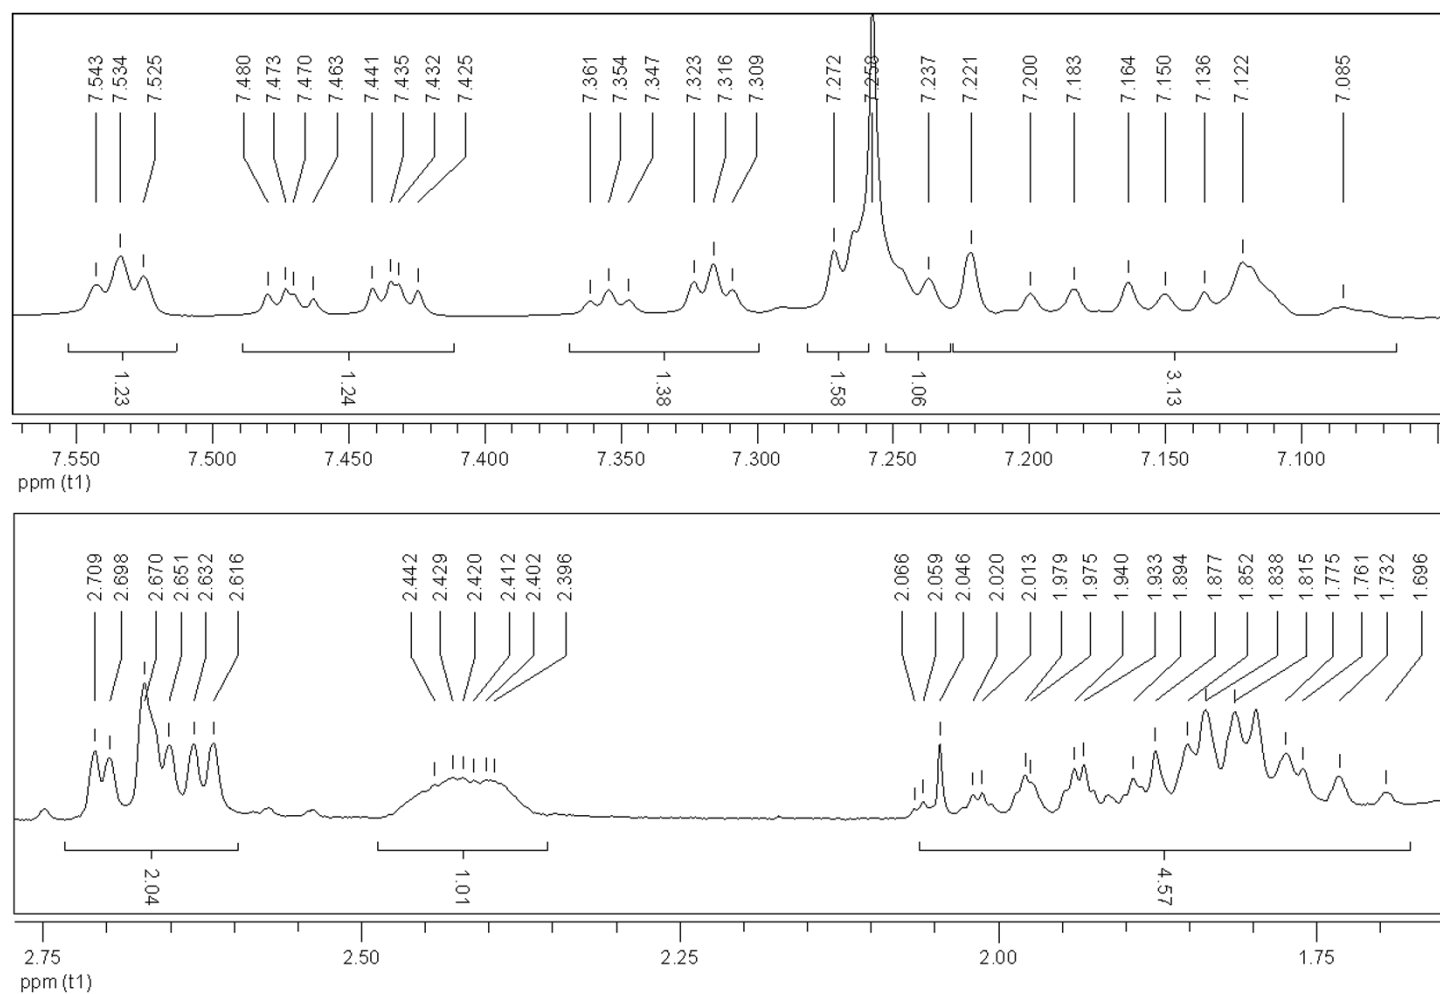

$^{13}\text{C}$ -NMR of compound *cis*-15e (50 MHz,  $\text{CDCl}_3$ )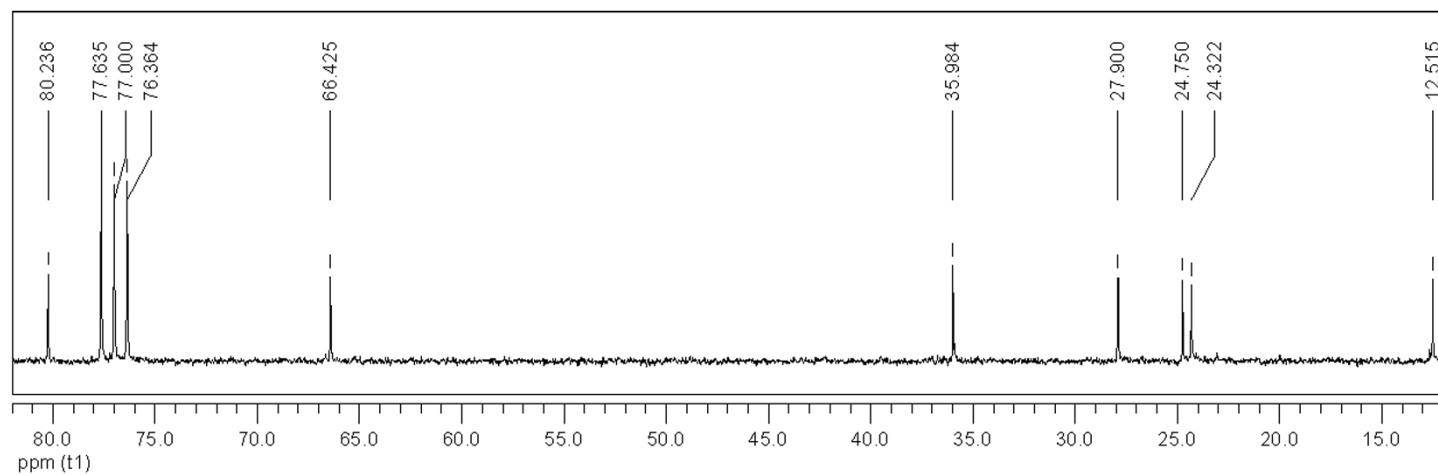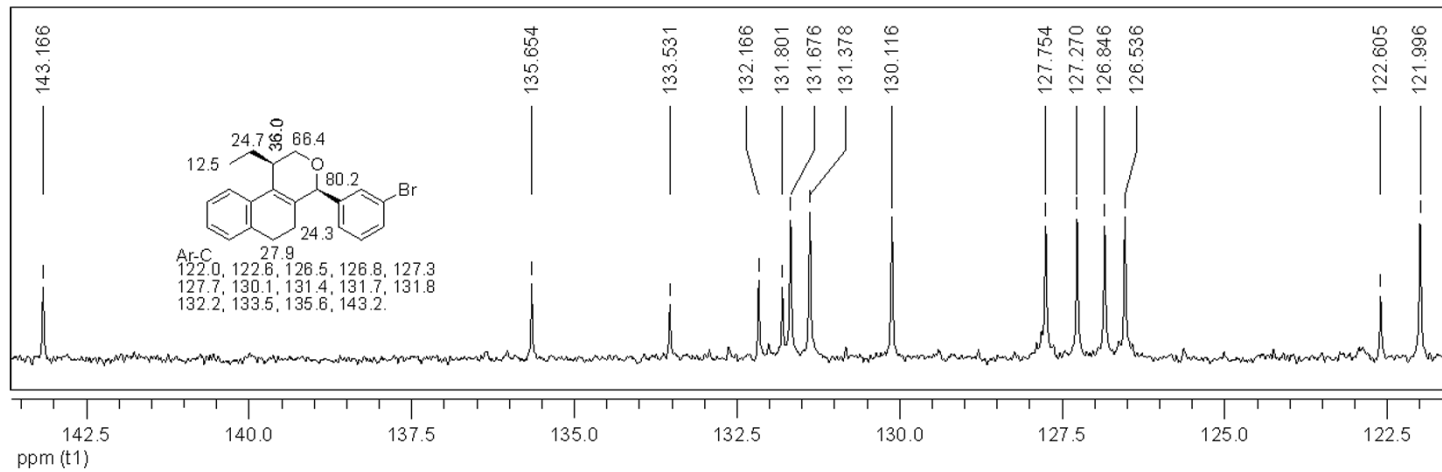

2D NOESY NMR of compound *cis-15e* (500 MHz, CDCl<sub>3</sub>)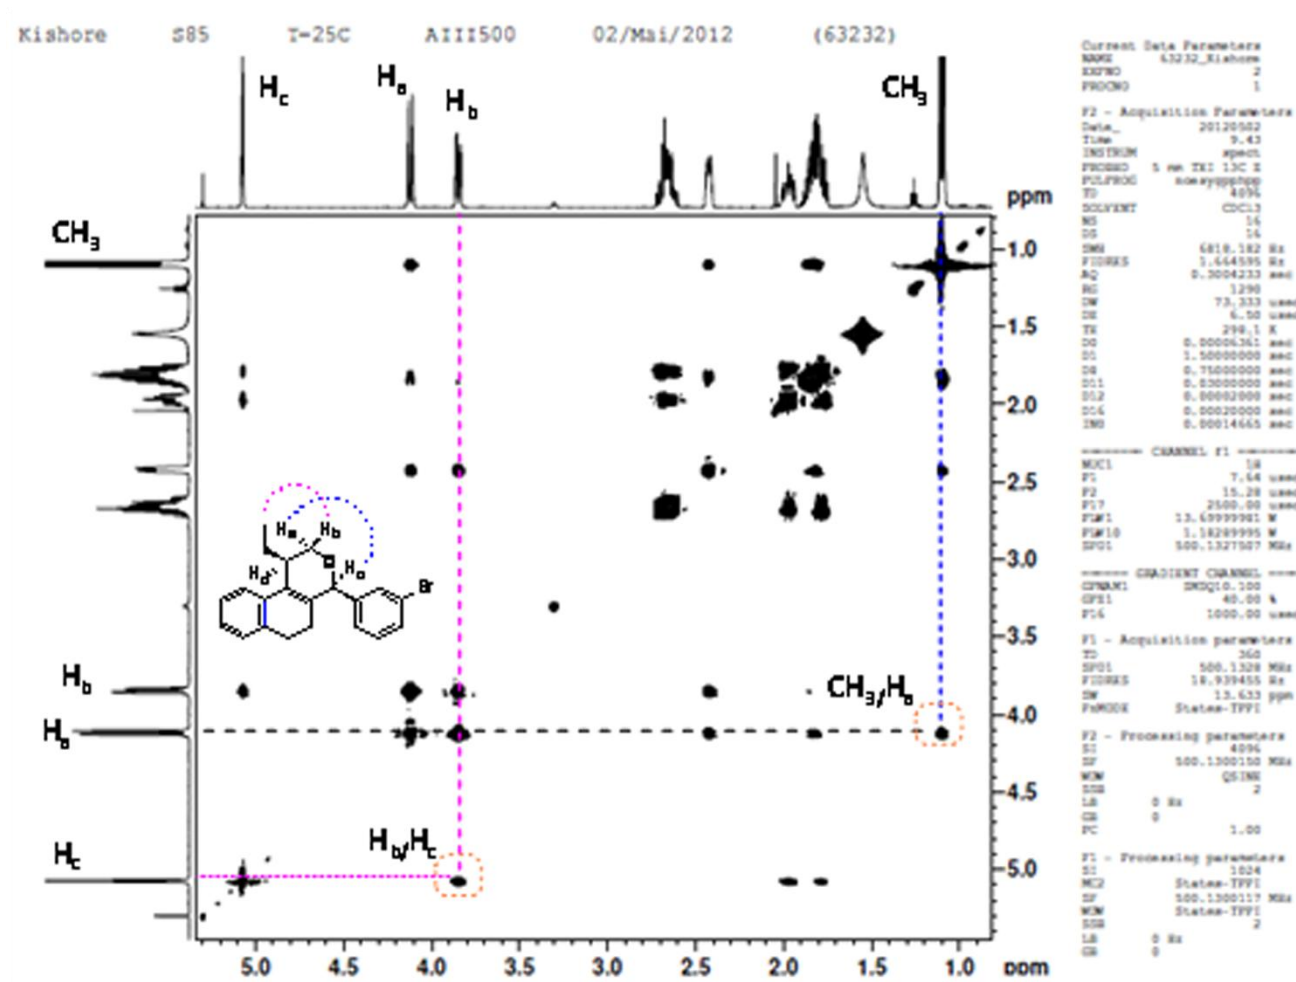

$^1\text{H}$ -NMR of compounds *cis*-**13g** and *trans*-**13g** (500 MHz,  $\text{CDCl}_3$ )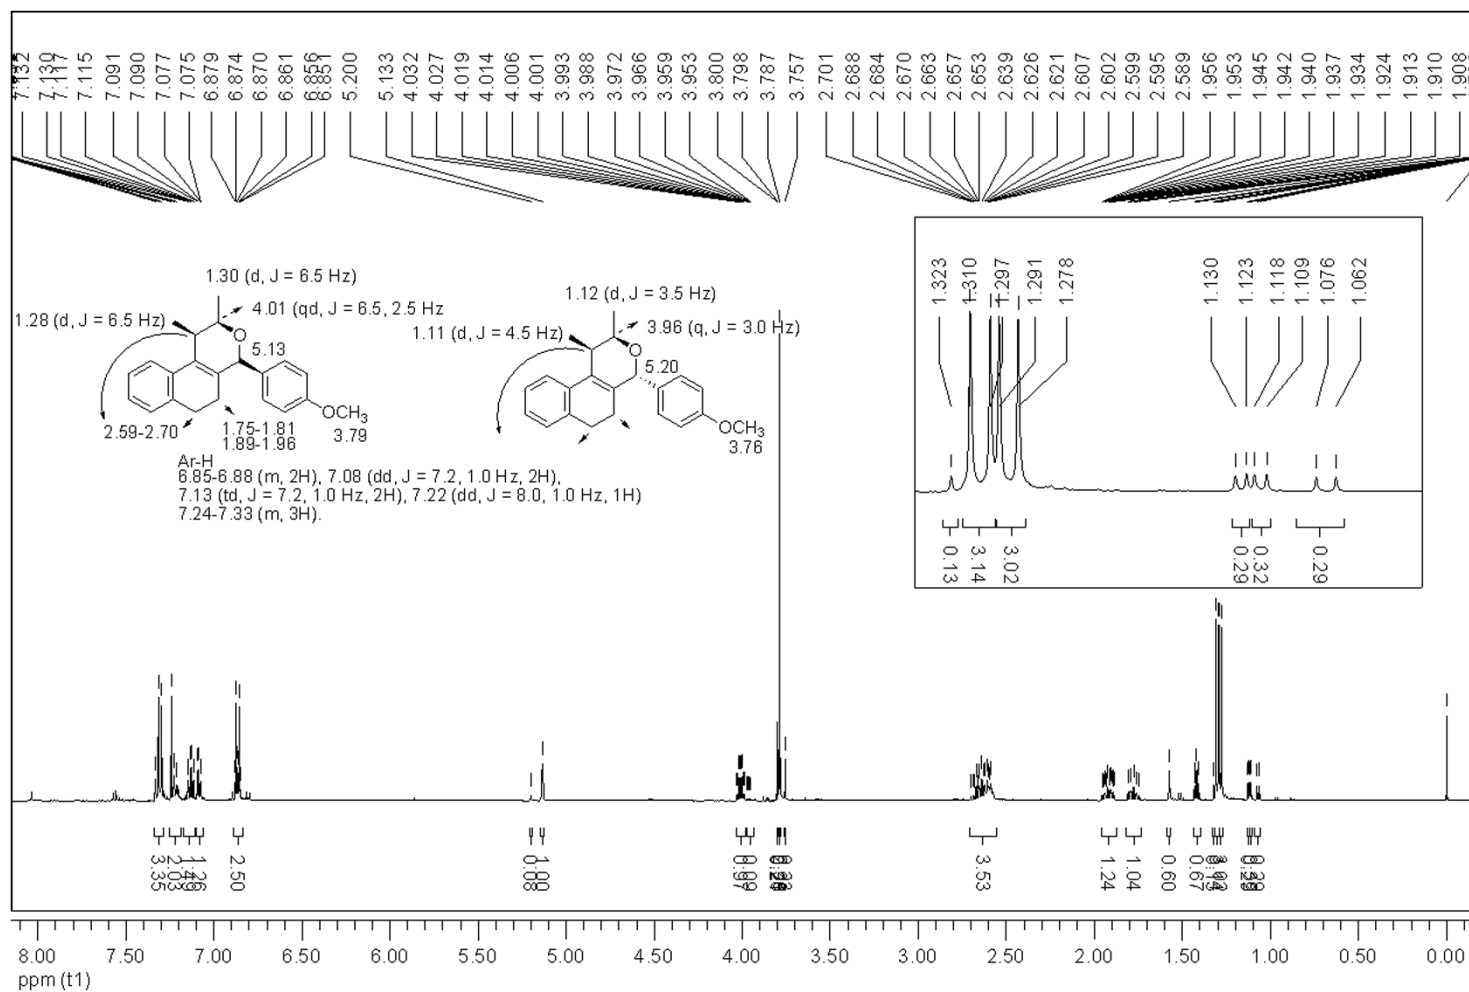

<sup>1</sup>H-NMR of compounds *cis*-**13g** and *trans*-**13g** (300 MHz, CDCl<sub>3</sub>)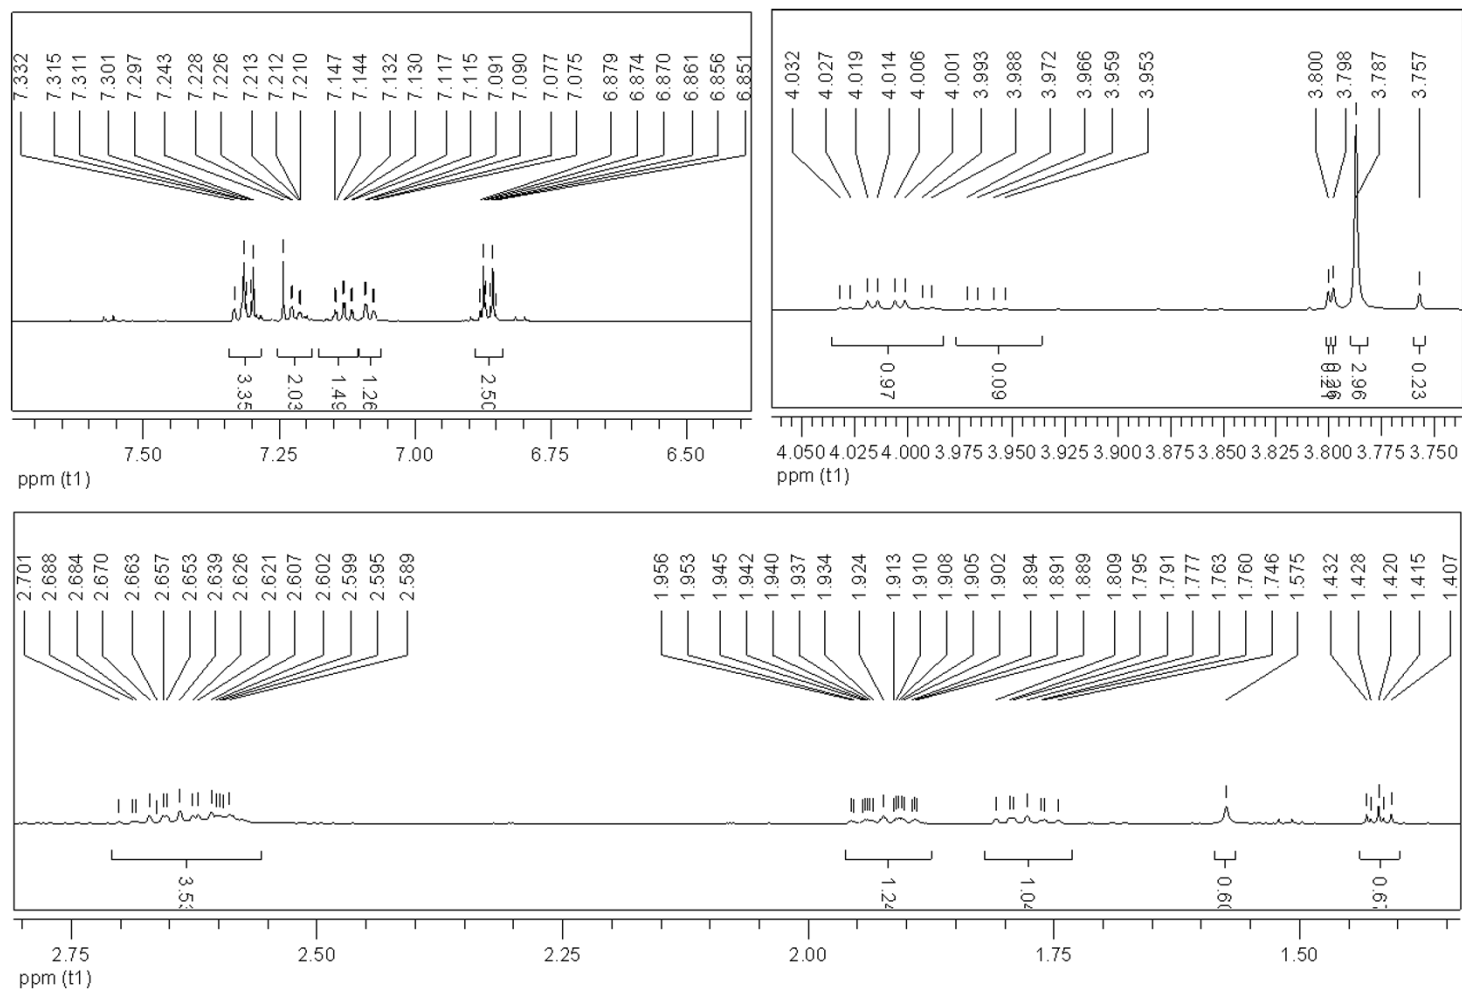

$^{13}\text{C}$ -NMR of compounds *cis*-**13g** and *trans*-**13g** (50 MHz,  $\text{CDCl}_3$ )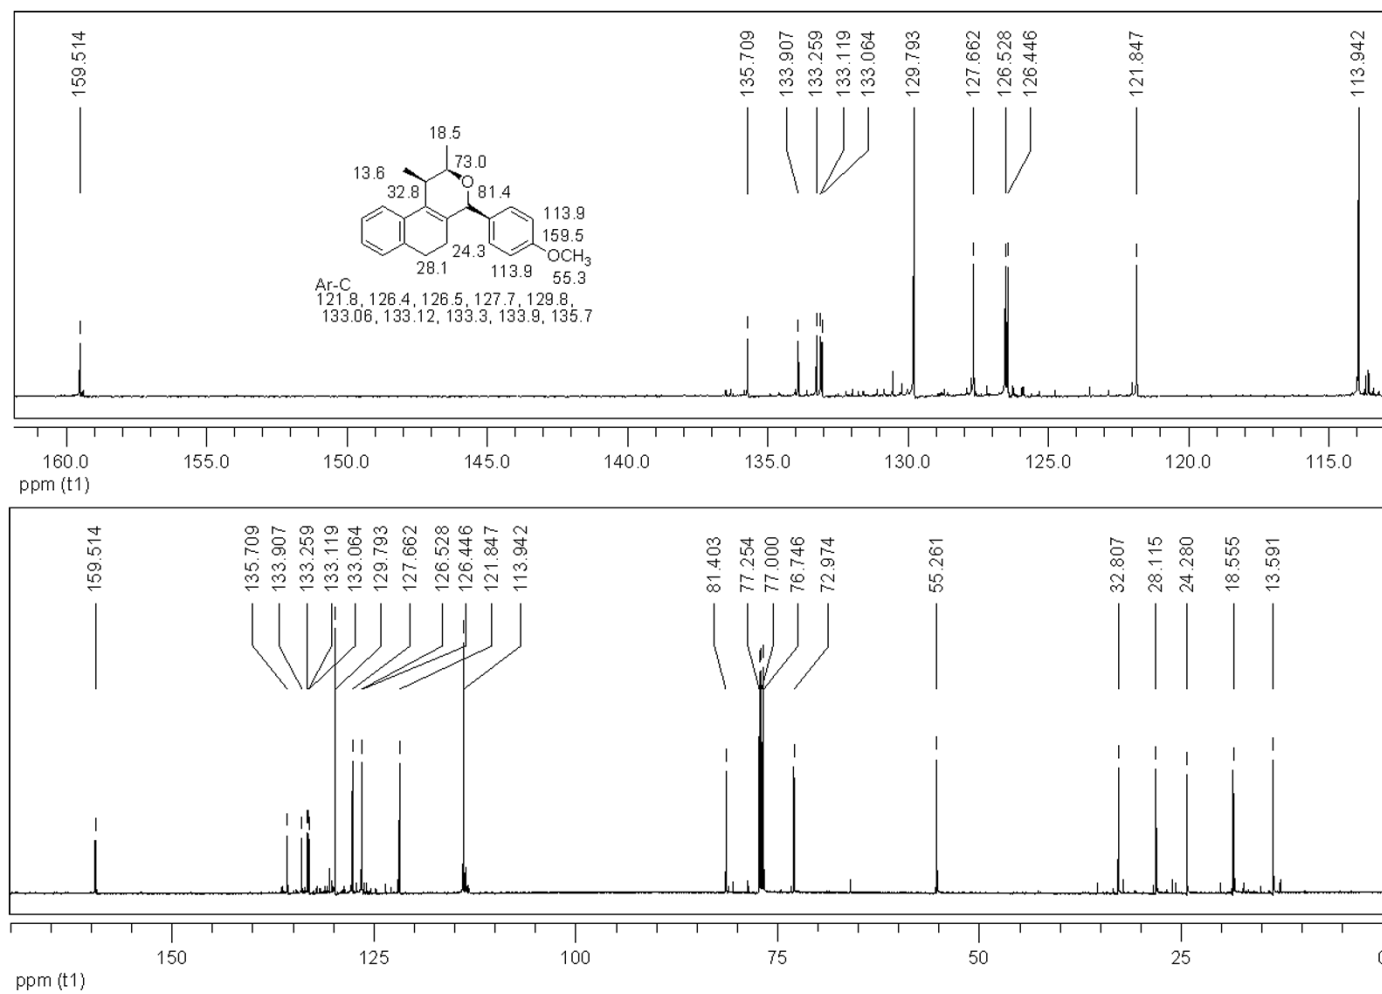

2D NOESY NMR of compound *cis*-13g (500 MHz, CDCl<sub>3</sub>)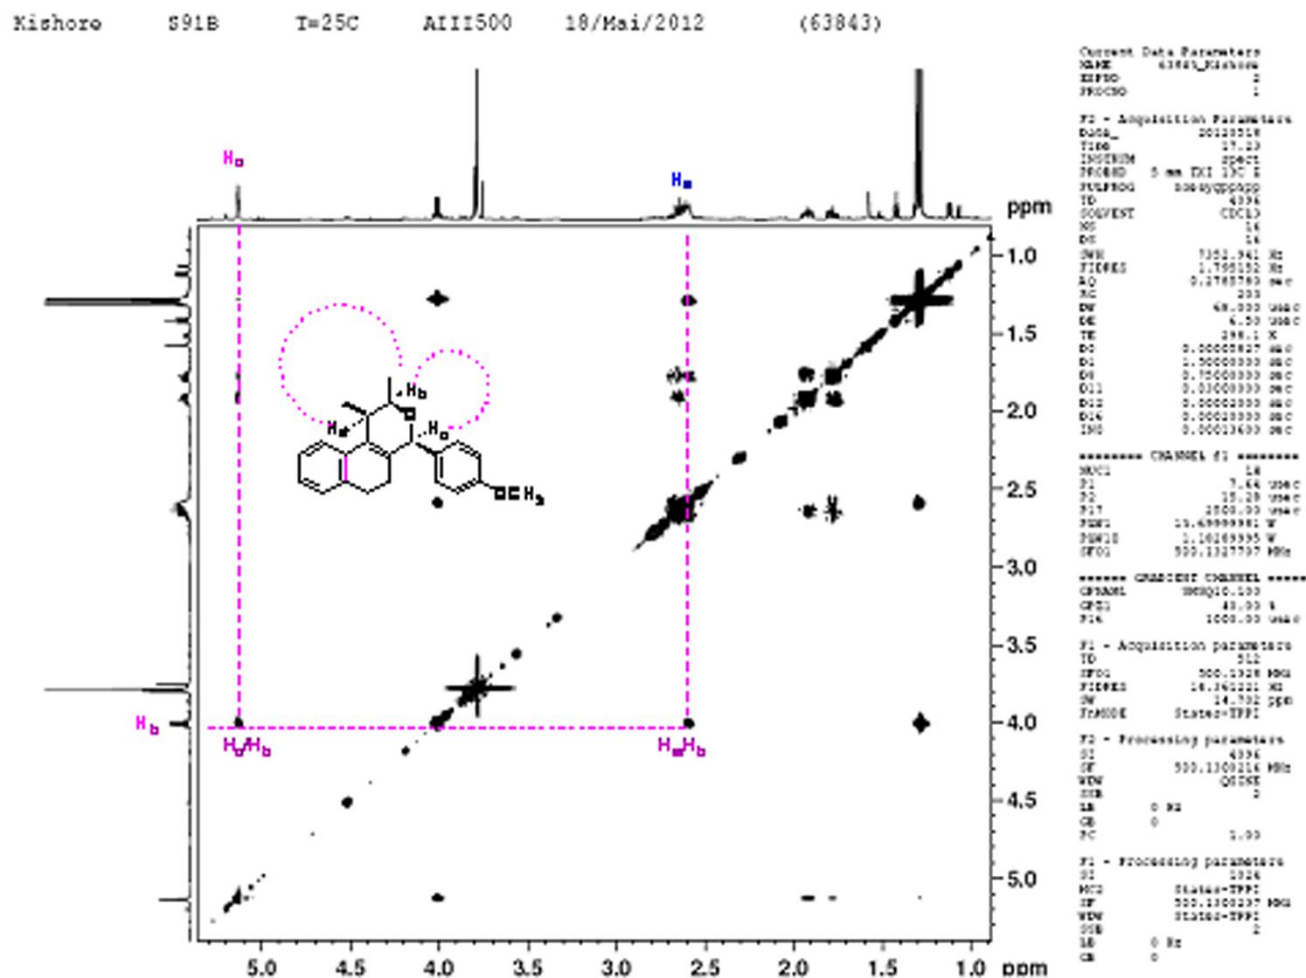

$^1\text{H}$ -NMR of compound **5h** (500 MHz,  $\text{CDCl}_3$ )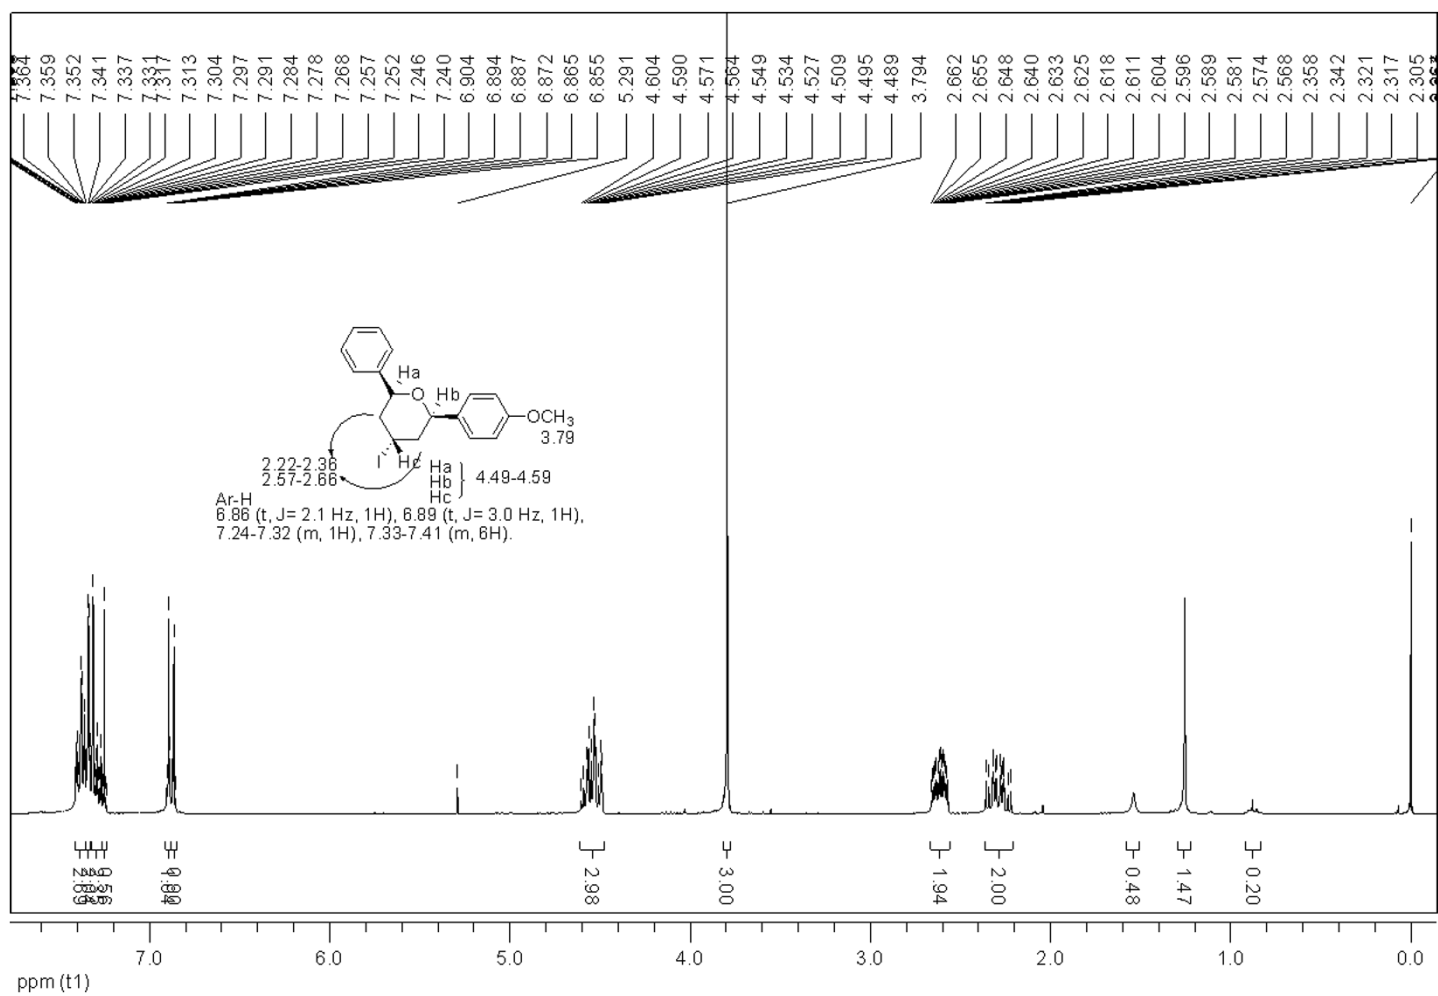

$^1\text{H}$ -NMR of compound **5h** (500 MHz,  $\text{CDCl}_3$ )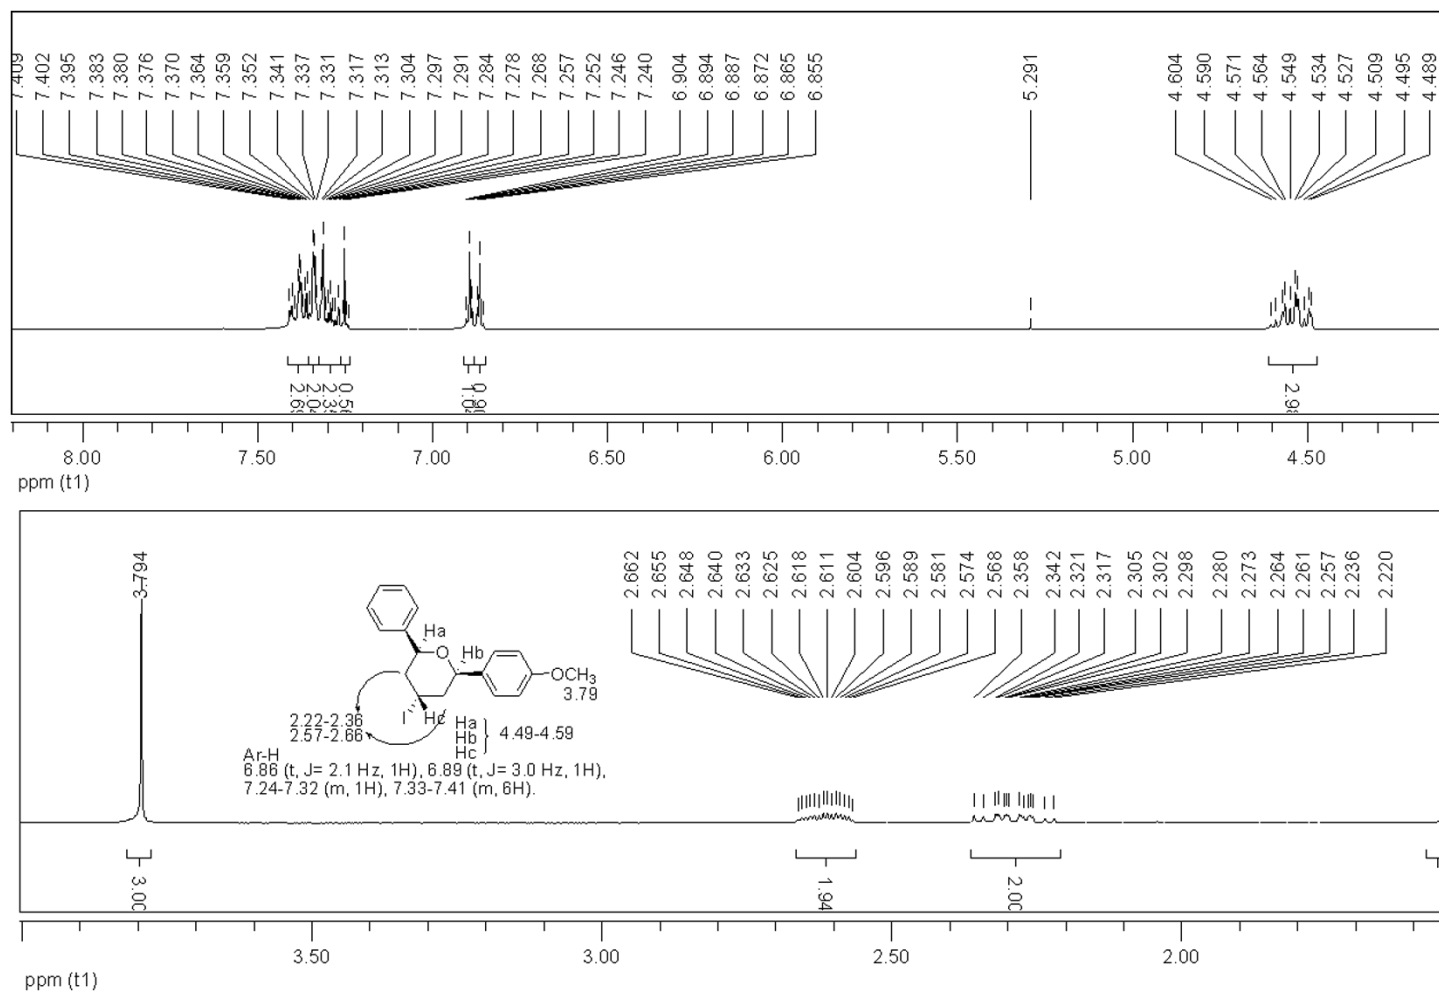

$^{13}\text{C}$ -NMR of compound **5h** (75 MHz,  $\text{CDCl}_3$ )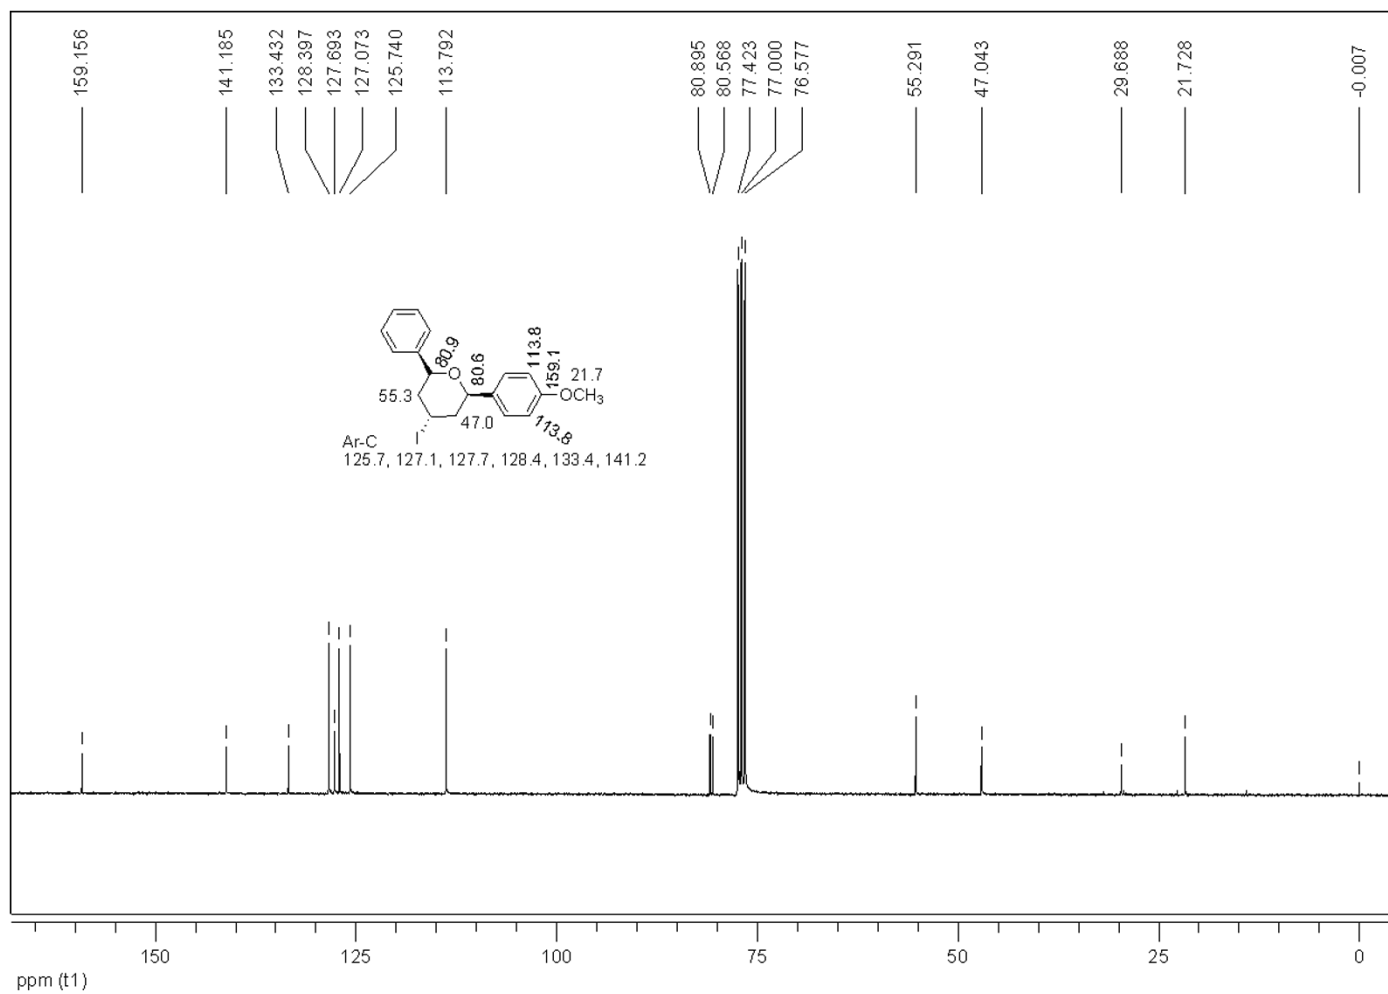

<sup>1</sup>H-NMR of compound **5i** (300 MHz, CDCl<sub>3</sub>)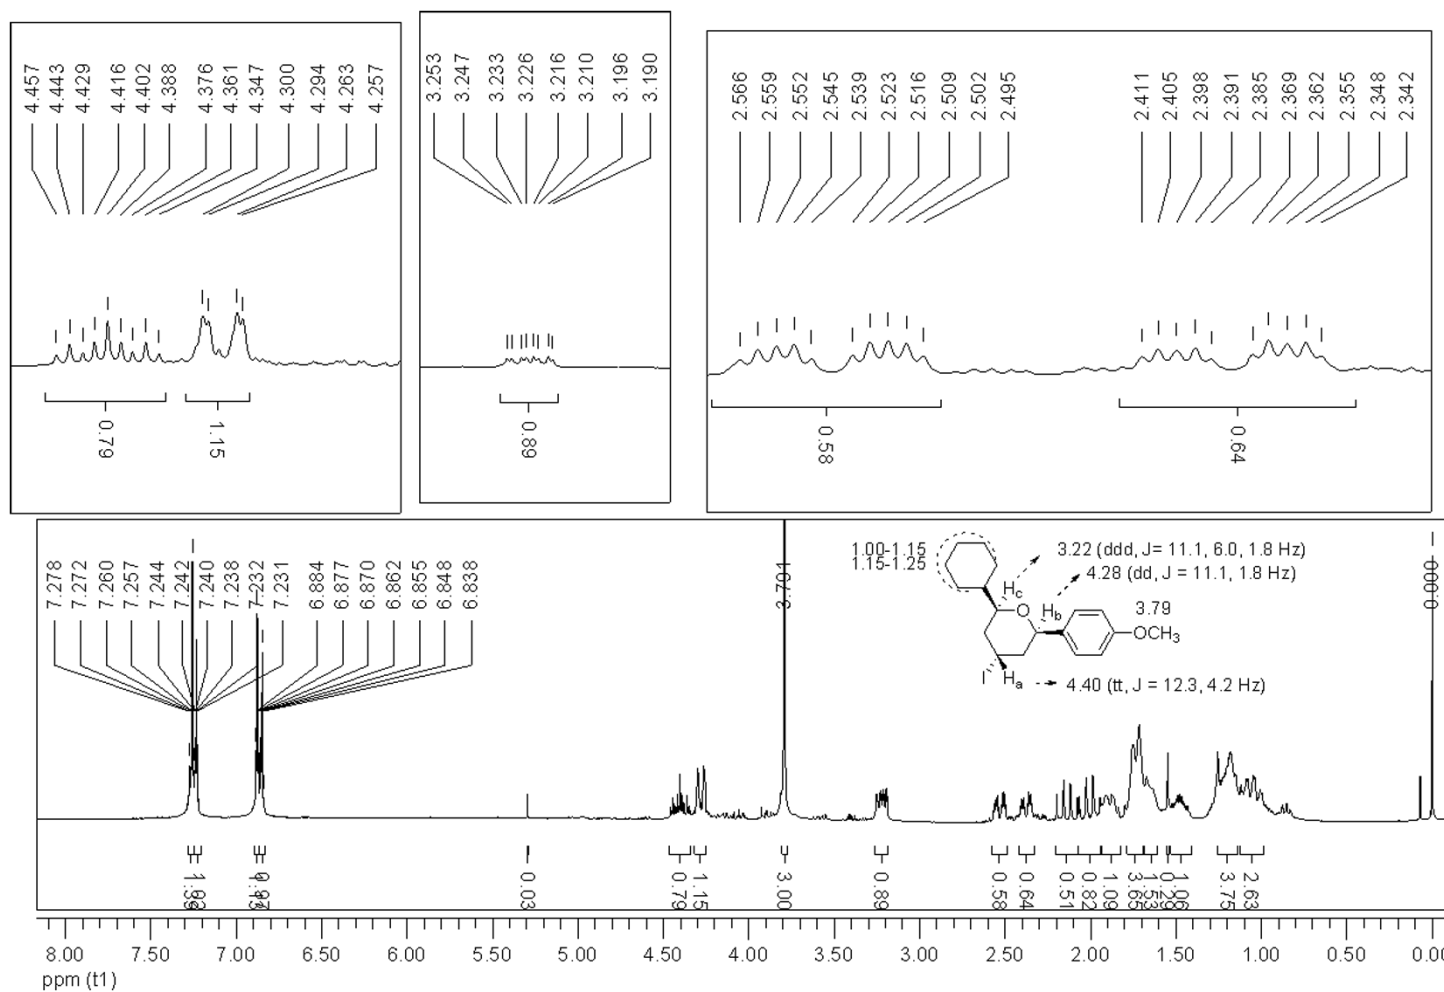

$^1\text{H}$ -NMR of compound **5i** (300 MHz,  $\text{CDCl}_3$ )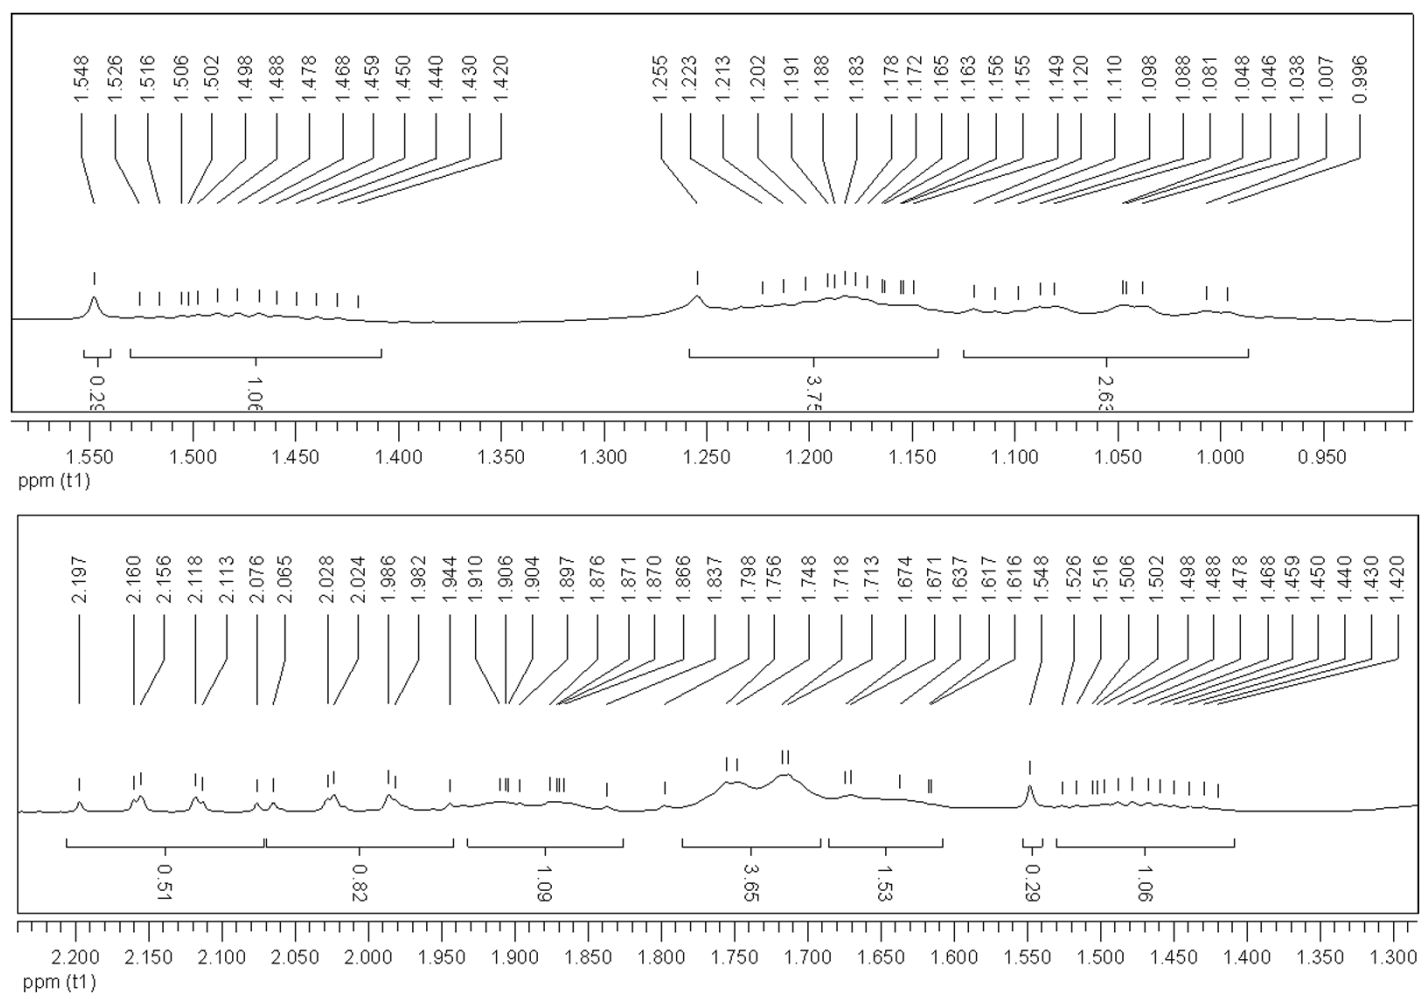

$^{13}\text{C}$ -NMR of compound **5i** (75 MHz,  $\text{CDCl}_3$ )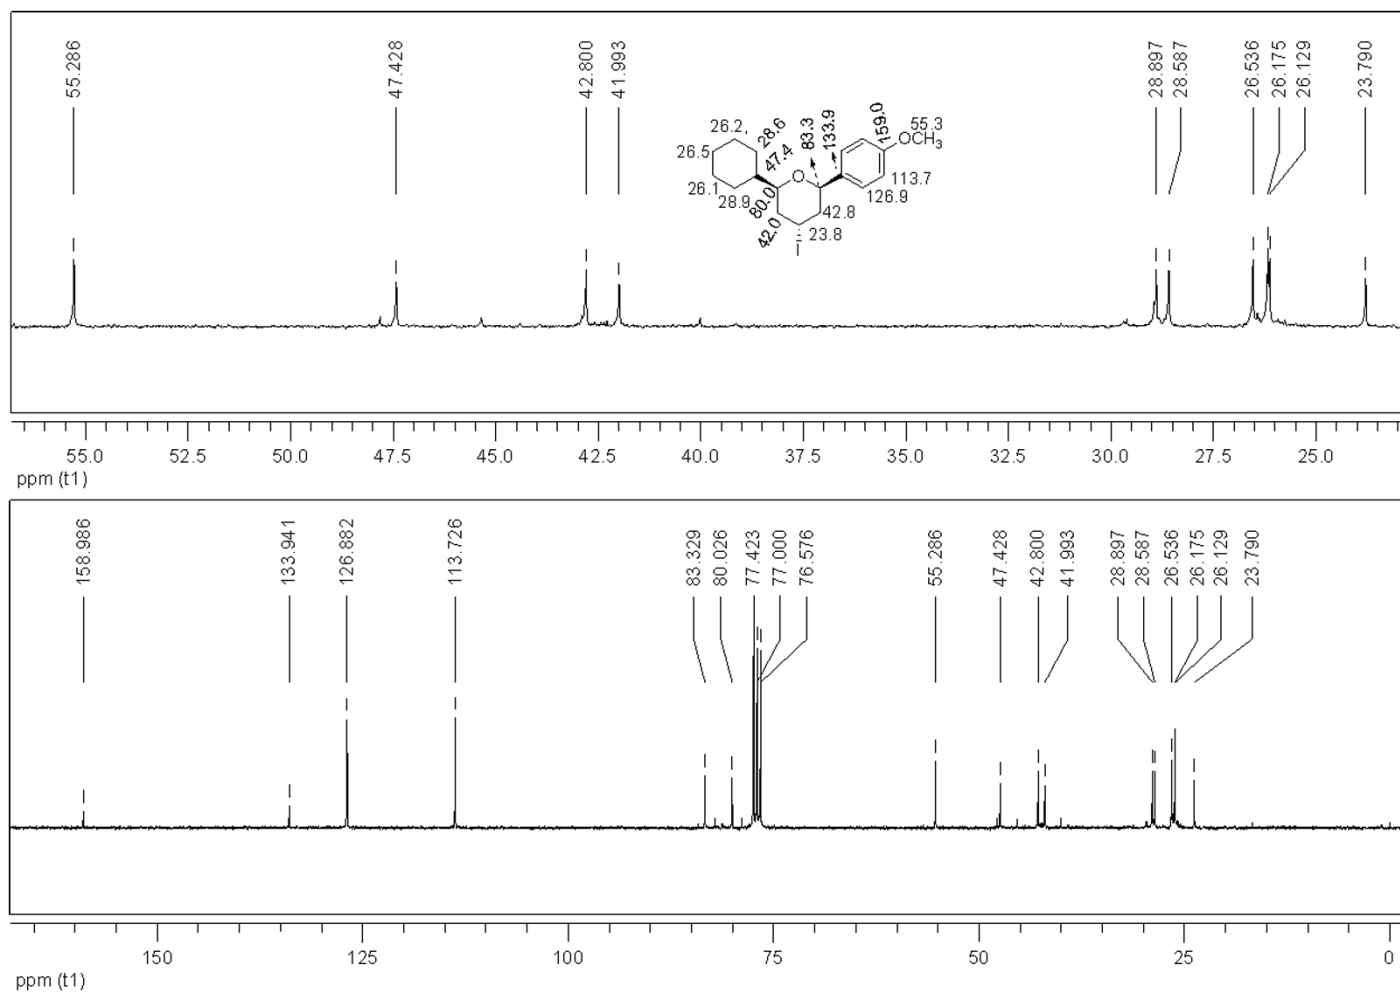

<sup>1</sup>H-NMR of compound **5j** (500 MHz, CDCl<sub>3</sub>)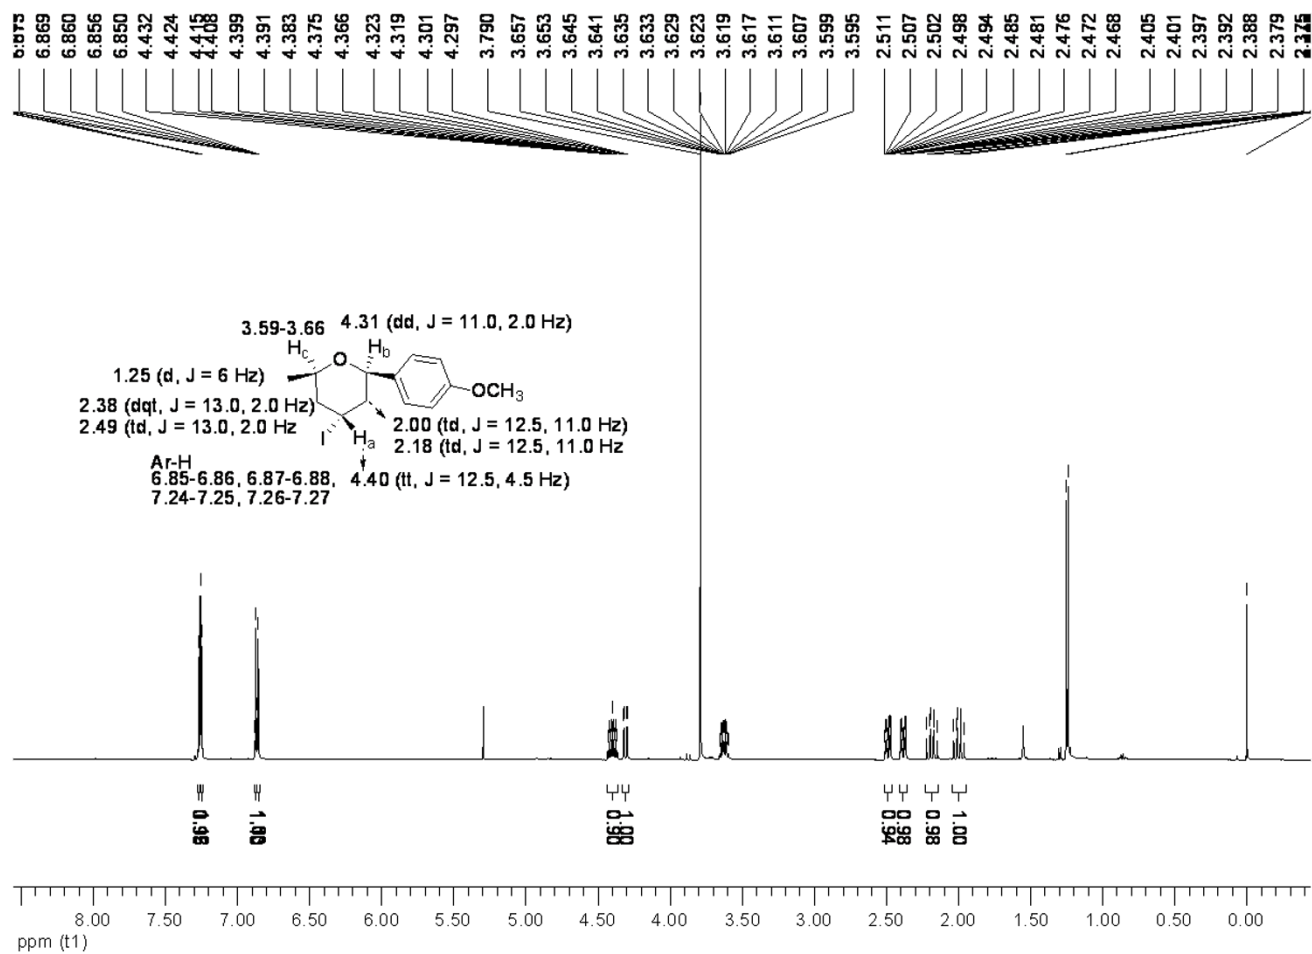

$^{13}\text{C}$ -NMR of compound **5j** (50 MHz,  $\text{CDCl}_3$ )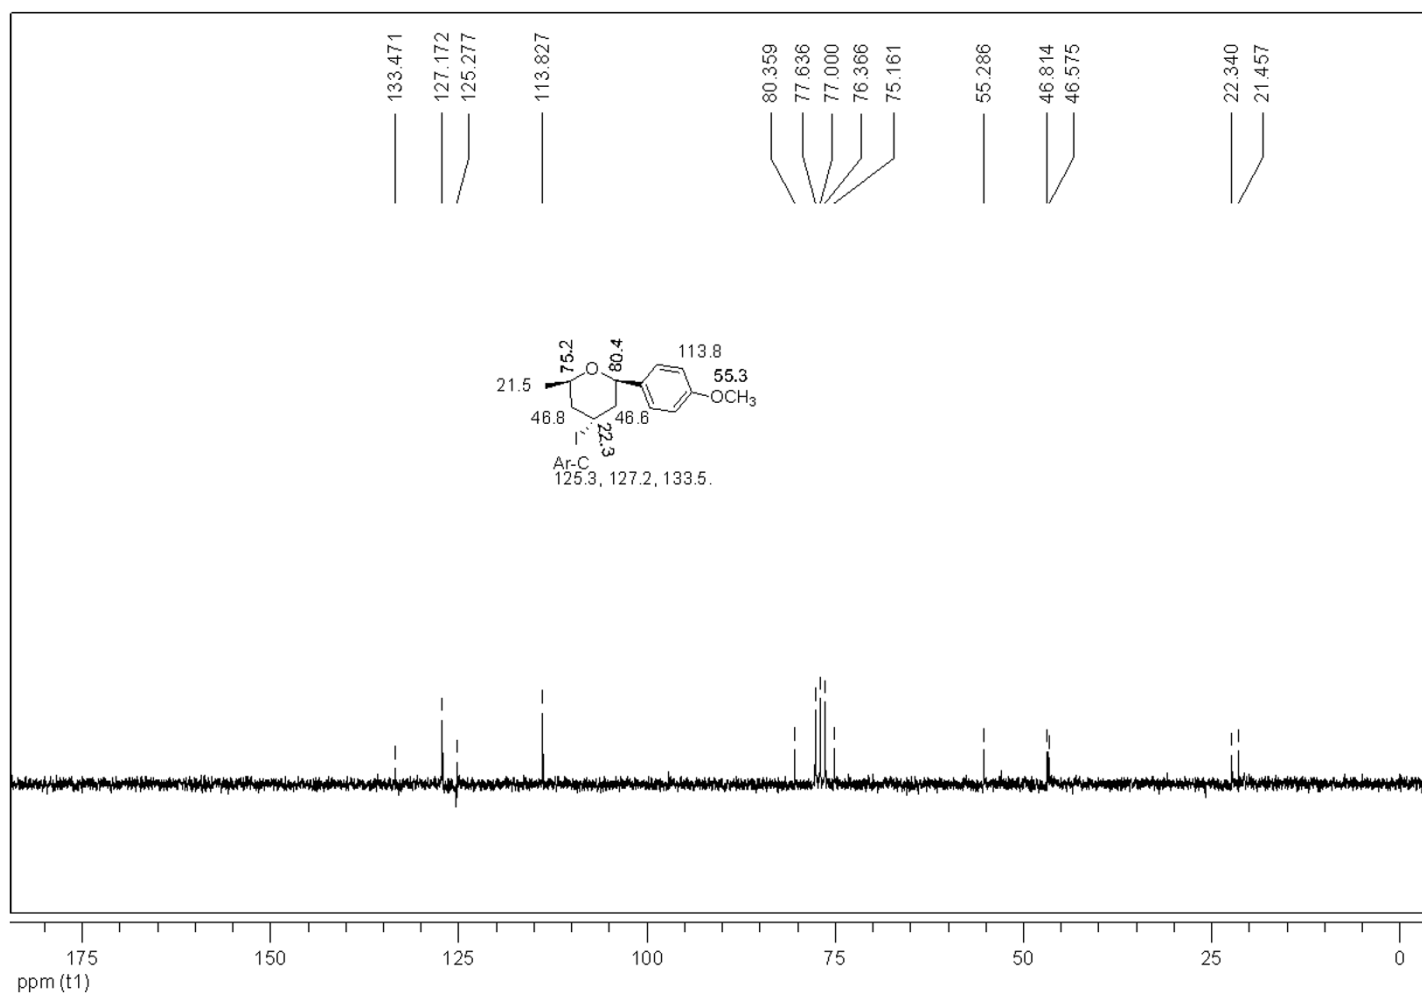

2D NOESY NMR of compound **5j** (500 MHz, CDCl<sub>3</sub>)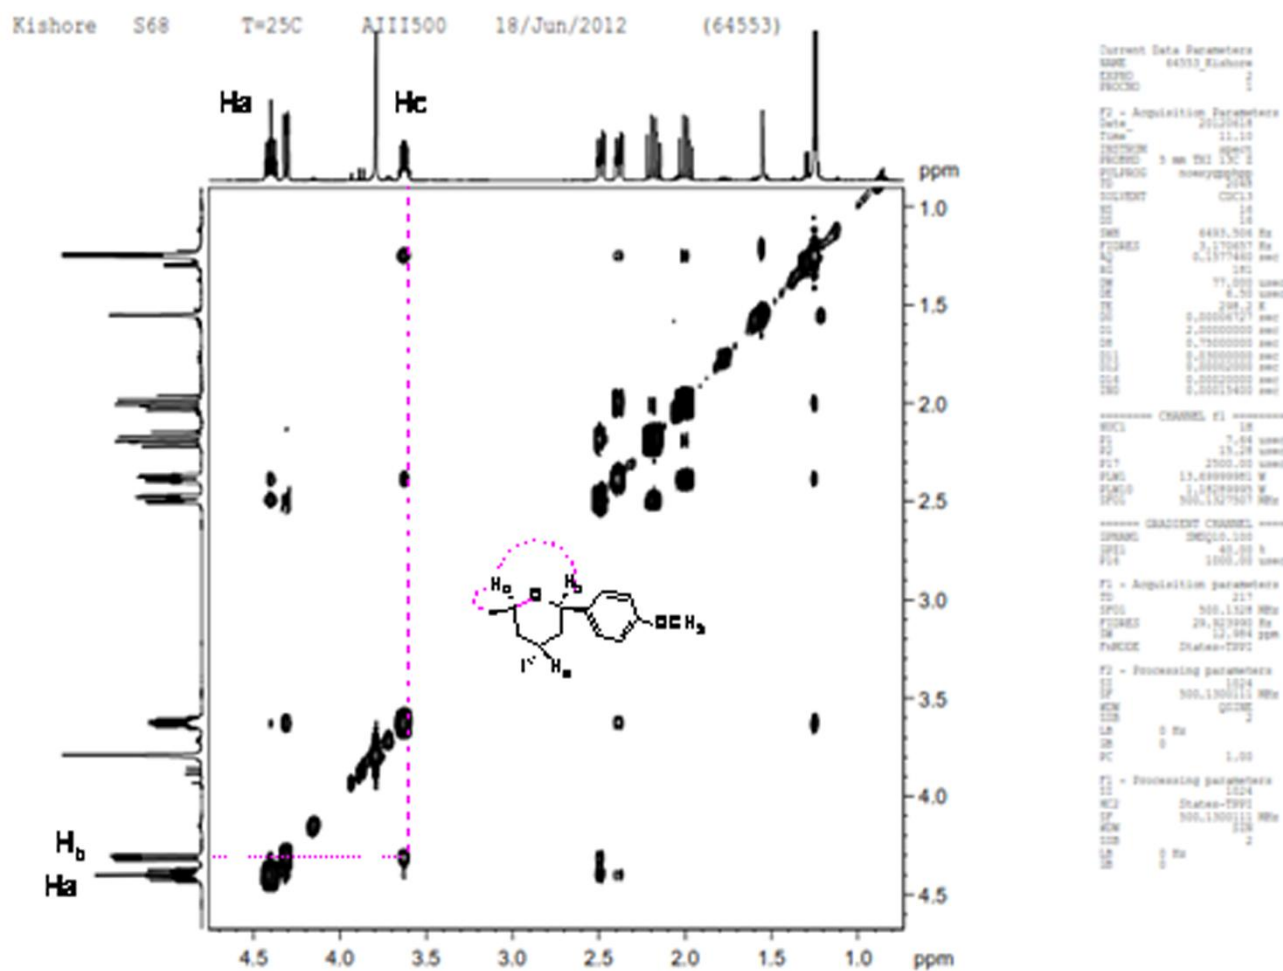

$^1\text{H}$ -NMR of compound **5k** (300 MHz,  $\text{CDCl}_3$ )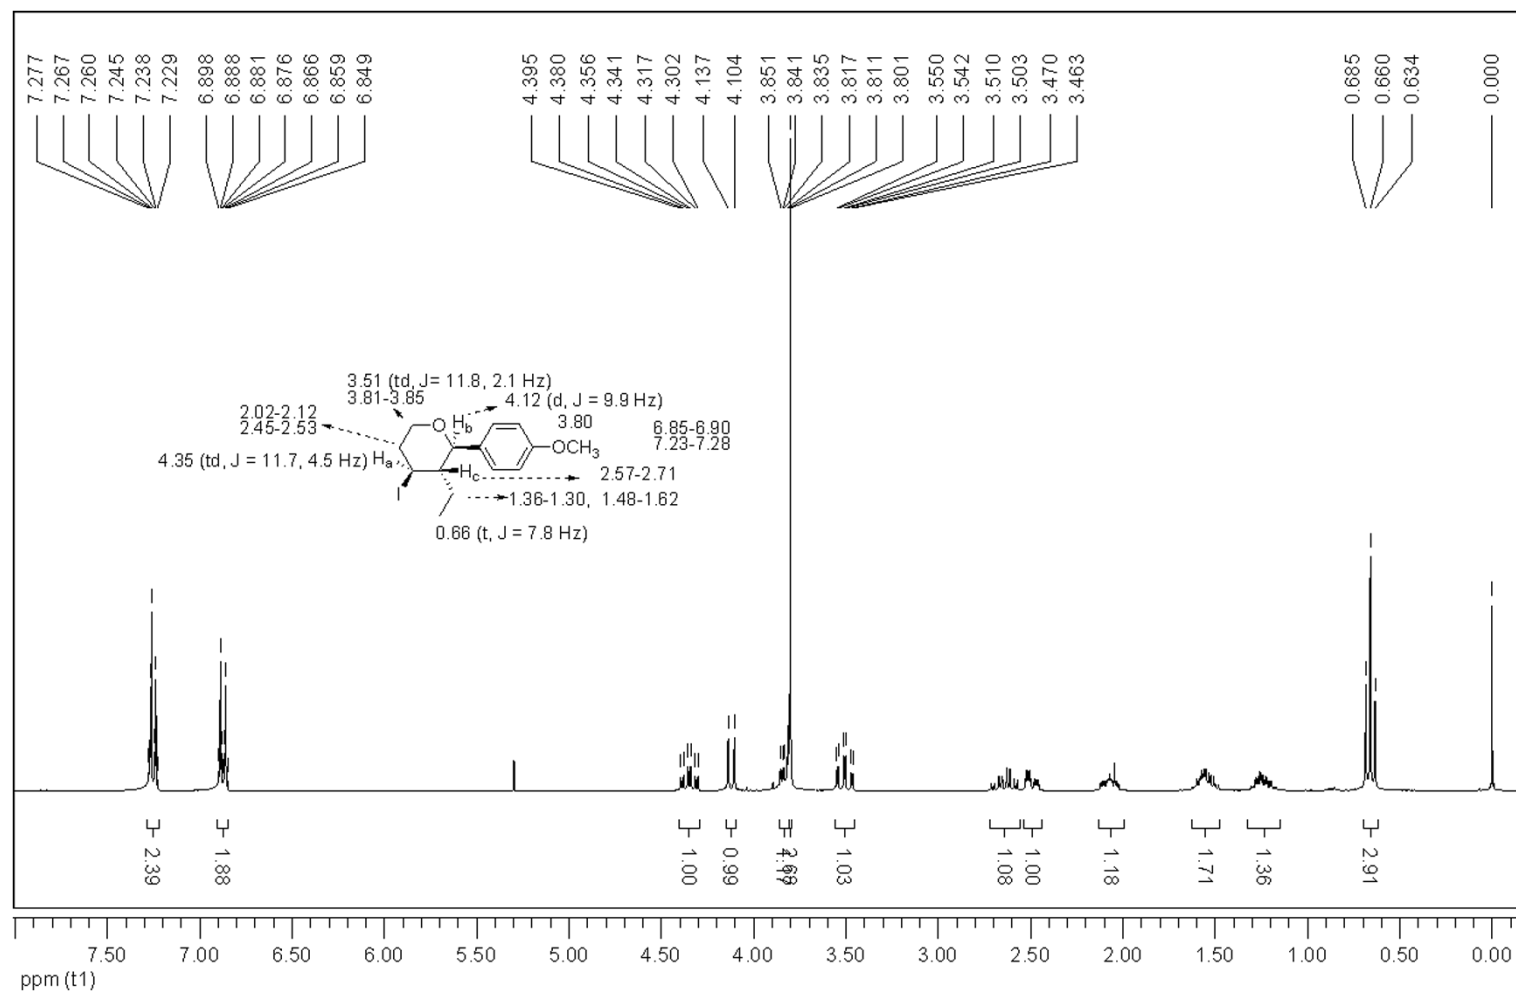

$^1\text{H}$ -NMR of compound **5k** (300 MHz,  $\text{CDCl}_3$ )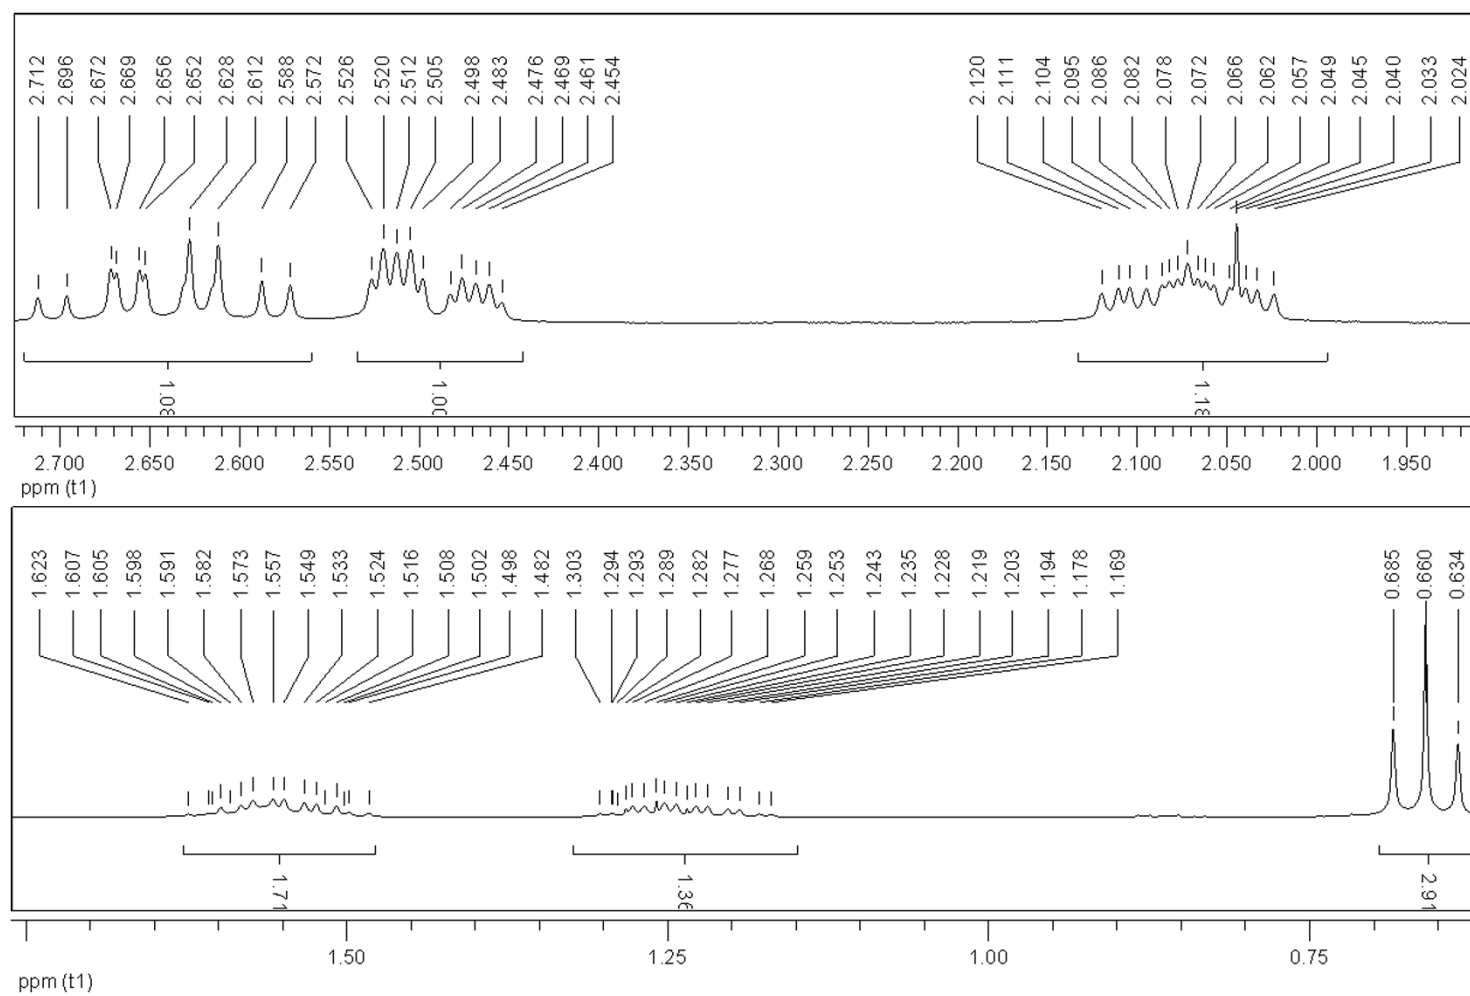

$^{13}\text{C}$ -NMR of compound **5k** (75 MHz,  $\text{CDCl}_3$ )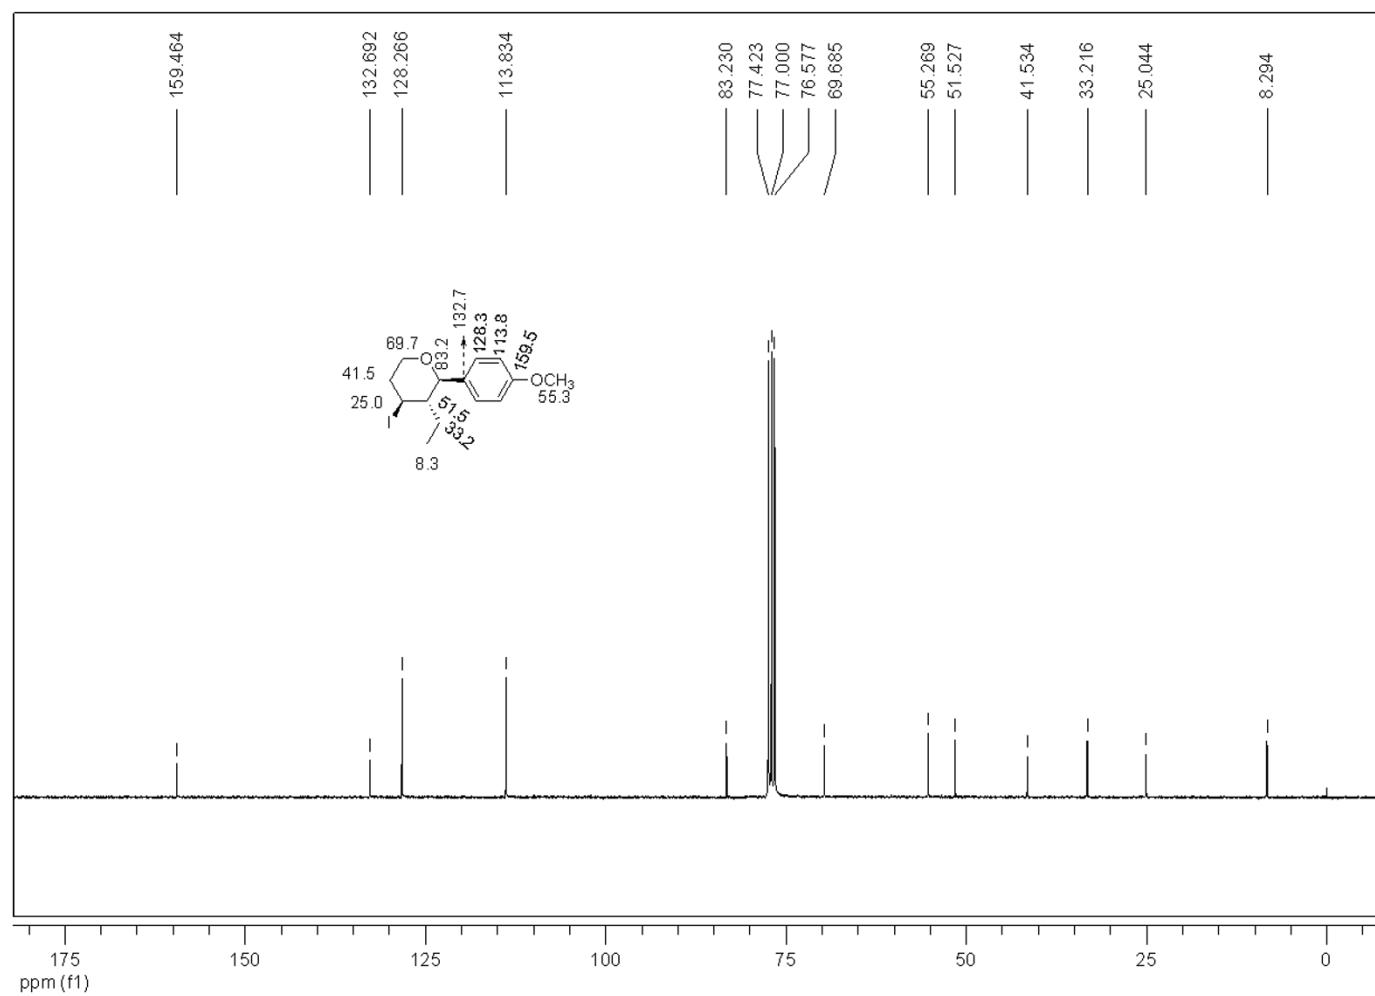

2D COSY NMR spectrum of compound 1a. The x-axis is  $^1\text{H}$  NMR (0-8 ppm) and the y-axis is  $^1\text{H}$  NMR (0-7 ppm). The 1D  $^1\text{H}$  NMR spectra are shown along the top and left axes. The 2D plot shows correlations between protons. Key correlations are highlighted: Hc (7.2 ppm) to Ha (7.0 ppm) and Hb (6.8 ppm); Ha (7.0 ppm) to Hc (7.2 ppm) and Hb (6.8 ppm); Hb (6.8 ppm) to Ha (7.0 ppm) and Hc (7.2 ppm). The aromatic region (6.5-7.5 ppm) shows correlations between Hc, Ha, and Hb. The aliphatic region (1.0-4.5 ppm) shows correlations between CH<sub>3</sub>/H<sub>a</sub> (1.0 ppm), H<sub>b</sub>/H<sub>c</sub> (3.5 ppm), and CH<sub>3</sub>/H<sub>b</sub> (4.0 ppm). A chemical structure of 1a is shown in the bottom right, with protons labeled: H<sub>a</sub> (aromatic), H<sub>b</sub> (aromatic), H<sub>c</sub> (aromatic), CH<sub>3</sub> (methyl), and H<sub>b</sub> (methylene).

<sup>1</sup>H-NMR of compound **51** (200 MHz, CDCl<sub>3</sub>)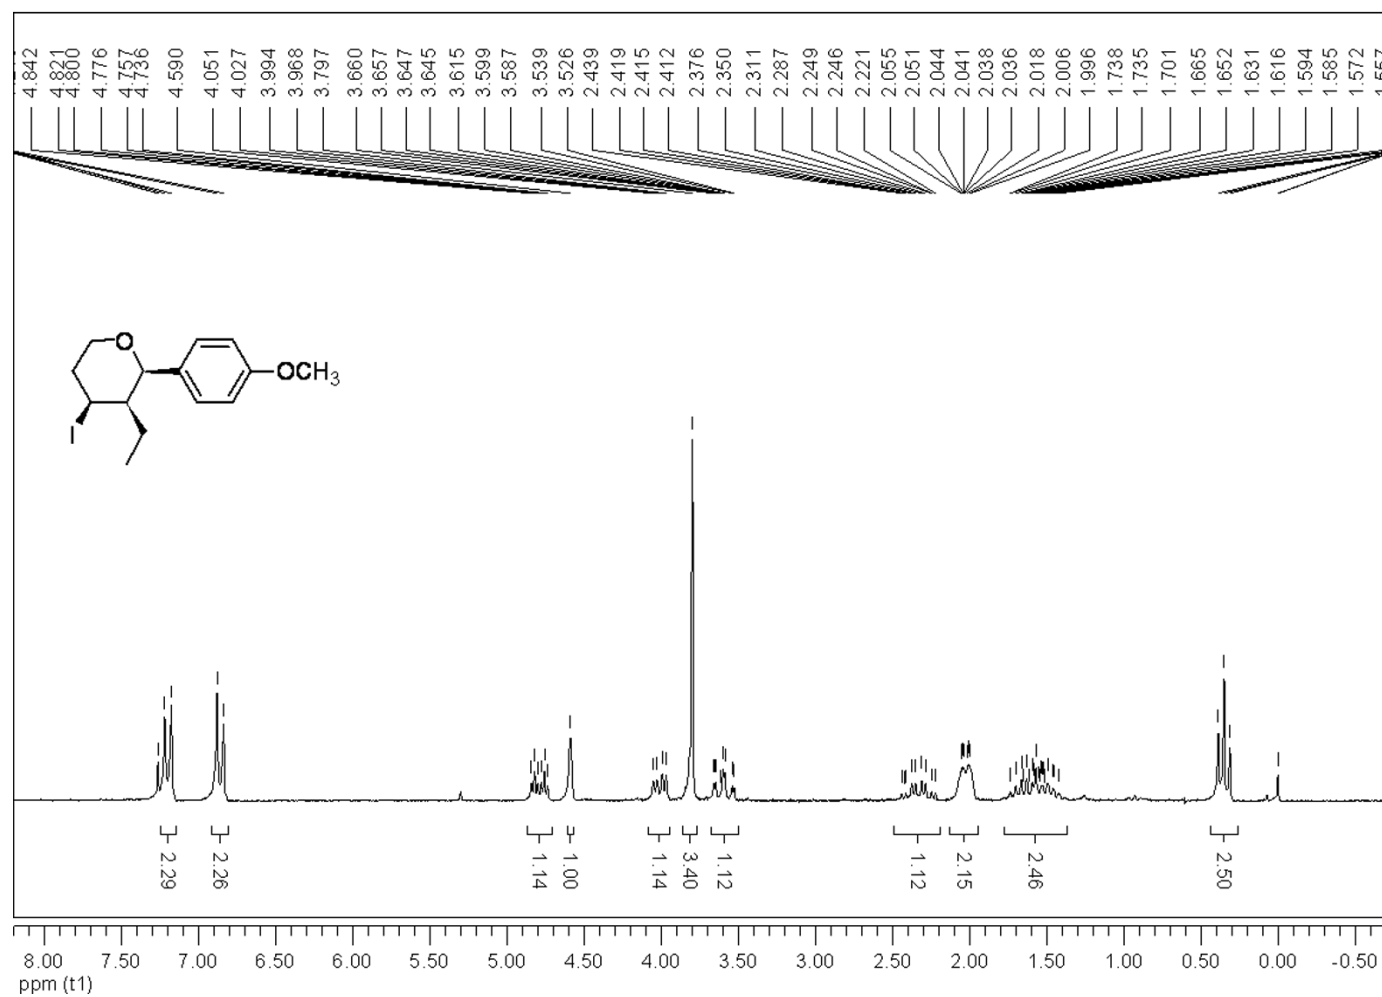

$^1\text{H}$ -NMR of compound **51** (200 MHz,  $\text{CDCl}_3$ )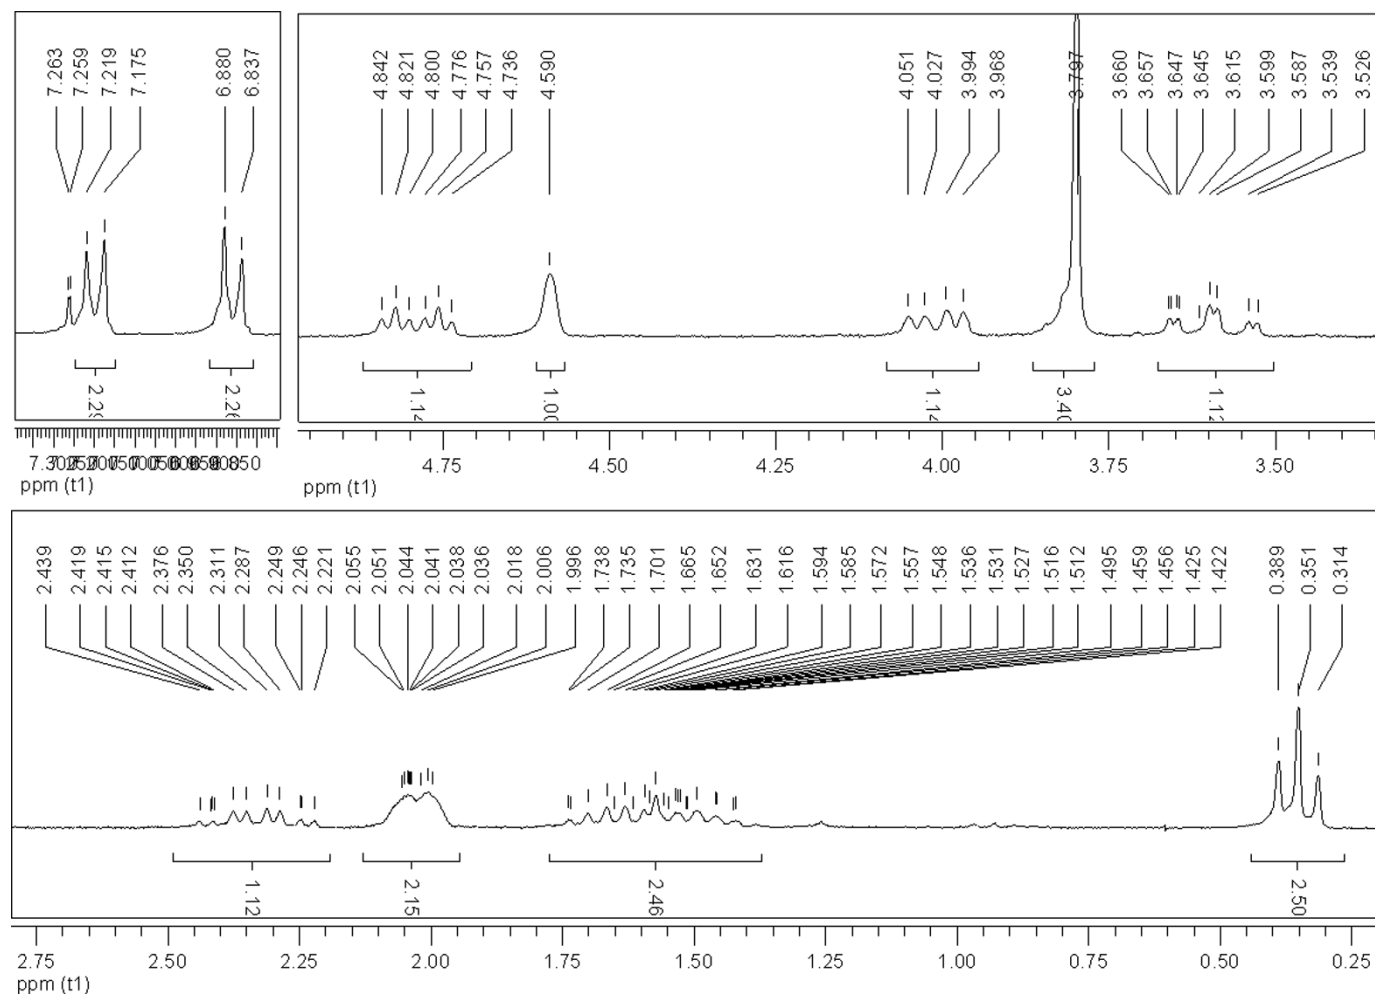

$^{13}\text{C}$ -NMR of compound **51** (50 MHz,  $\text{CDCl}_3$ )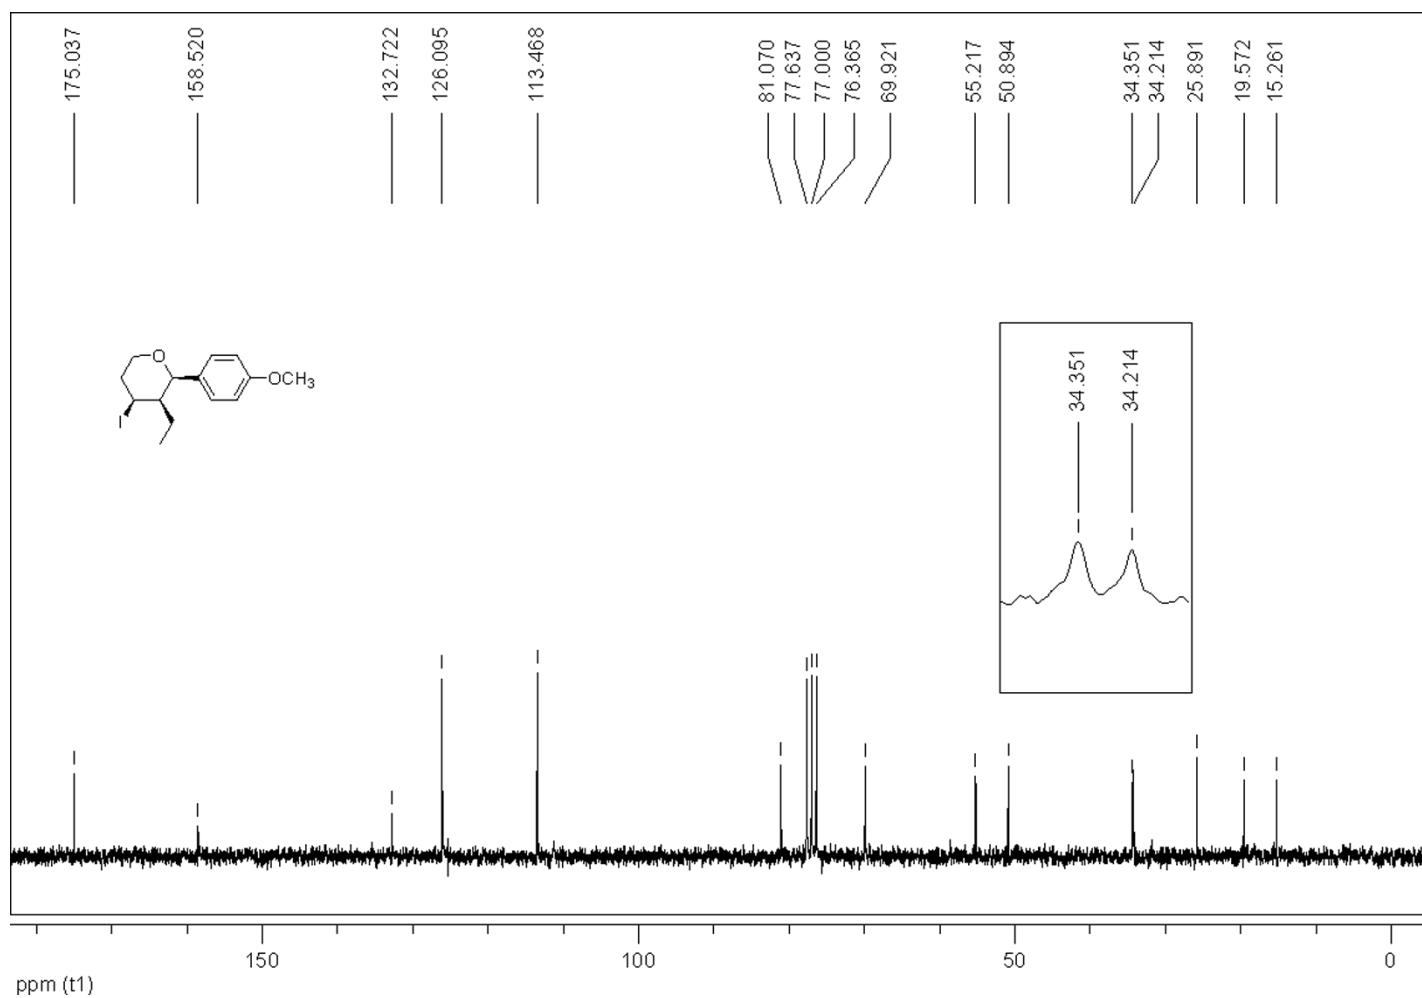

Supplement: s1 [file s1]
